# Supplementary material for: Inhibition of ERAD synergizes with FTS to eradicate pancreatic cancer cells
Source: PubMed Central journal article supplement (PMC7937230; doi:10.1186/s12885-021-07967-6), 2021-03-06

## **Inhibition of ERAD synergizes with FTS to eradicate pancreatic cancer cells**

Rong Du<sup>1,2,3</sup>, Delaney K. Sullivan<sup>4</sup>, Nancy G. Azizian<sup>1,2</sup>, Yuanhui Liu<sup>1,2</sup>, Yulin Li<sup>1,2\*</sup>

<sup>1</sup>Center for Immunotherapy Research, Houston Methodist Research Institute, Houston, TX 77030, USA; <sup>2</sup>Department of Medicine, Weill Cornell Medical College, New York, NY 10065, USA; <sup>3</sup>Department of Neurosurgery, Xiangya Hospital, Central South University, Changsha, Hunan 410008, China. <sup>4</sup>UCLA-Caltech Medical Scientist Training Program, David Geffen School of Medicine, University of California, Los Angeles, Los Angeles, CA 90095, USA

**\*Corresponding author:** Yulin Li, Houston Methodist Research Institute. 6670 Bertner Avenue. Houston, TX 77030, USA. Phone: 713-441-7350; Fax: 713-441-7438; Email: [yli@houstonmethodist.org](mailto:yli@houstonmethodist.org)

### **List of supplementary figures**

#### **Supplementary Figure S1. Combination indexes show synergistic effect between EerI and FTS**

- (A) Berenbaum combination index (CI). CI value of lower than 1 indicates synergy.
- (B) Cell viability tests presented as mean  $\pm$  SD. Data analysis and calculation of IC50 was performed using GraphPad Prism 8.
- (C) The CI values of FTS and EerI in 4292, PANC-1, and MIA PaCa-2 cells, indicating synergistic effect.

#### **Supplementary Figure S2. Original images of the Western blot presented in Figure 3A and 3C**

#### **Supplementary Figure S3. Validation of *SYVNI* and *SELIL* CRISPR knockouts by PCR and Sanger sequencing**

- (A) Map of *SYVNI* and *SELIL* and their respective sgRNAs. Half-arrows indicate the primer sets used to for PCR amplification. Primer sequences are listed in **Supplementary Table 5**.
- (B) PCR amplicons of wild type control and the knockouts using primer sets depicted in **S3A**.
- (C) Sanger sequencing of *SYVNI* exon3 PCR products. In *SYVNI* KO1, one allele shows 40nt deletion between the targeting sites of sg2 and sg3, and mutations/frameshift around sg3 targeting site in the other allele.
- (D) Sanger sequencing of *SELIL* 1F-3R PCR product from *SELIL* KO1 validating a 106 nucleotide deletion between the targeting sites of sg1 and sg3.

#### **Supplementary Figure S4. Original images of the Western blot presented in Figure 4A and 4F**

# Supplementary Figure S1

**A**

$$CI = \frac{D_{FTS}}{IC50_{FTS}} + \frac{D_{EerI}}{IC50_{EerI}} = 1 \text{ for additivity}$$

>1 for antagonism  
<1 for synergy

$IC50_{FTS}$  – IC50 of FTS alone

$IC50_{EerI}$  – IC50 of EerI alone

$D_{FTS}$  – IC50 of FTS in the presence of  $IC50_{EerI}$

$D_{EerI}$  – IC50 of EerI in the presence of  $IC50_{FTS}$

**B**

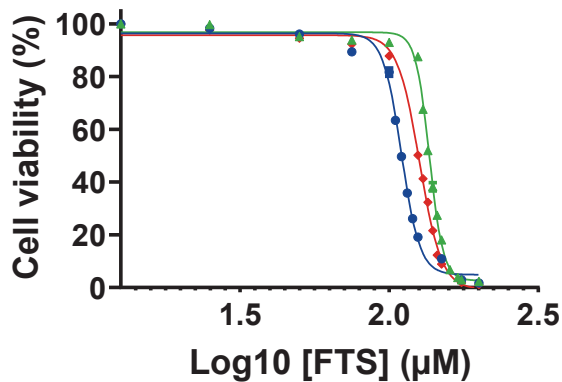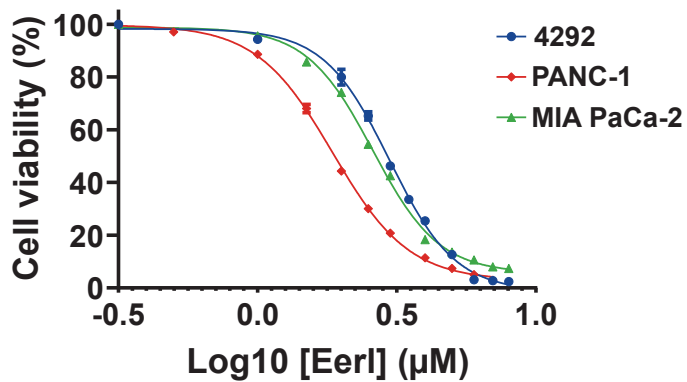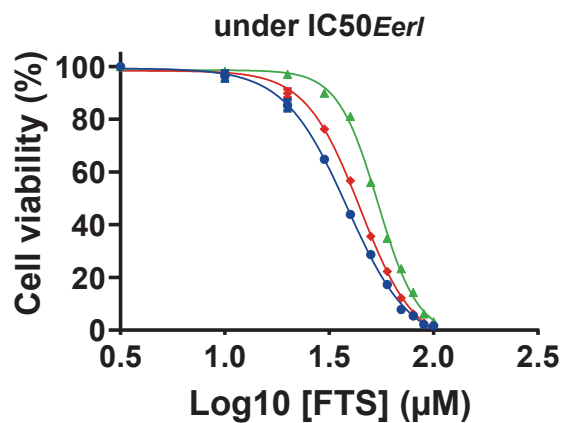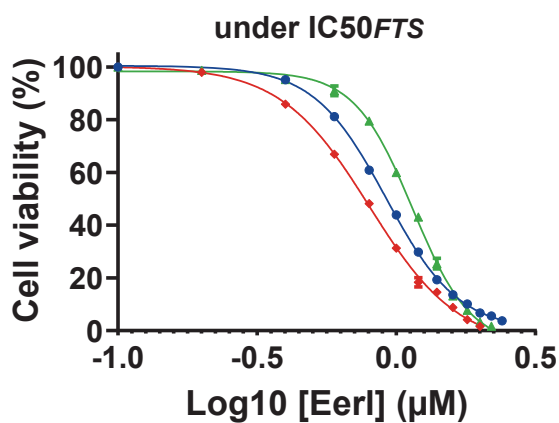

**C**

|            | $IC50_{FTS}$<br>( $\mu\text{M}$ ) | $IC50_{EerI}$<br>( $\mu\text{M}$ ) | $D_{FTS}$<br>( $\mu\text{M}$ ) | $D_{EerI}$<br>( $\mu\text{M}$ ) | $CI$  |
|------------|-----------------------------------|------------------------------------|--------------------------------|---------------------------------|-------|
| 4292       | 110.0                             | 2.982                              | 38.56                          | 0.920                           | 0.659 |
| PANC-1     | 126.5                             | 1.863                              | 44.55                          | 0.802                           | 0.783 |
| MIA PaCa-2 | 136.5                             | 2.595                              | 54.15                          | 1.146                           | 0.838 |

# Supplementary Figure S2

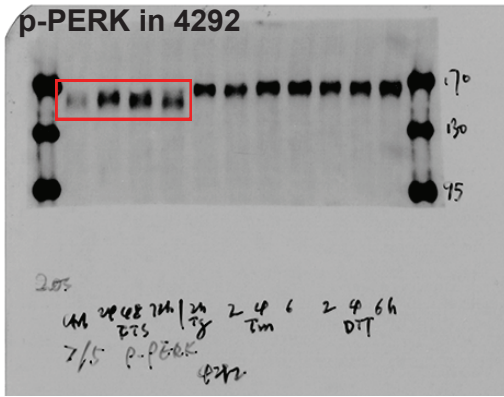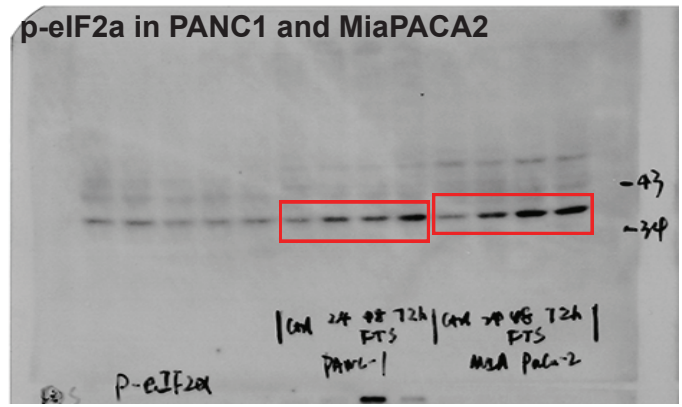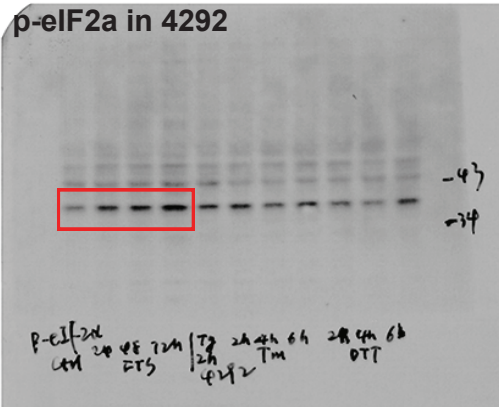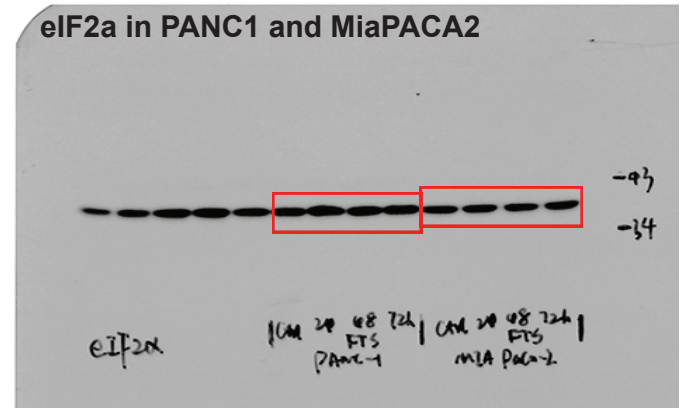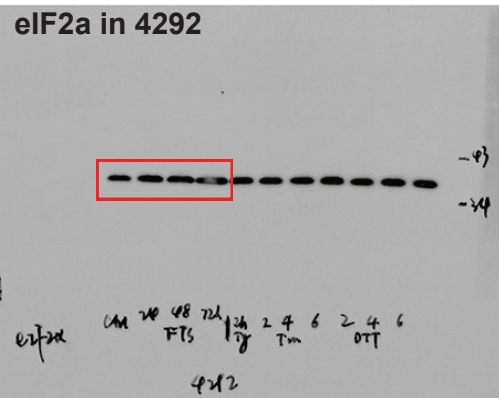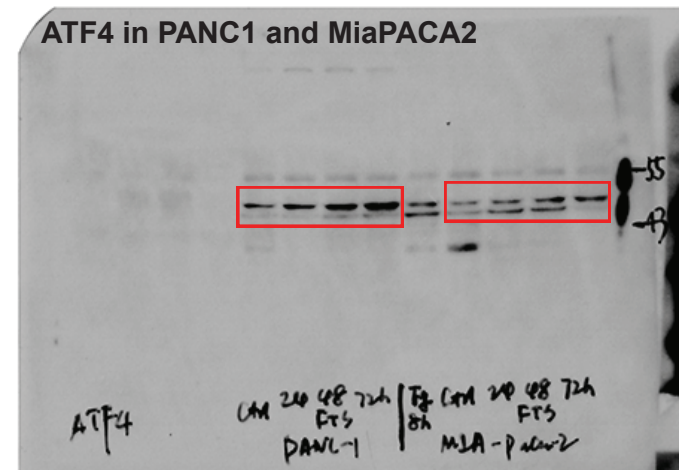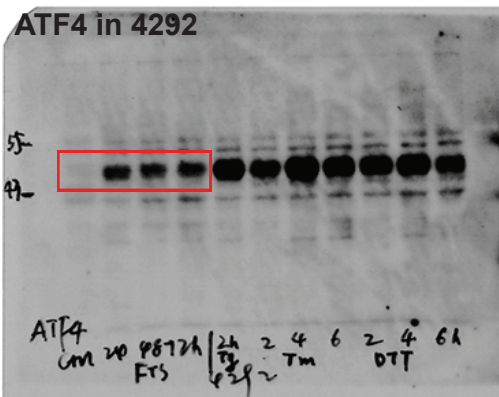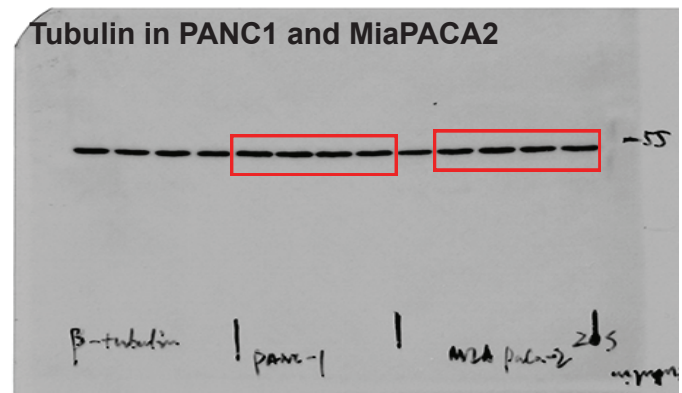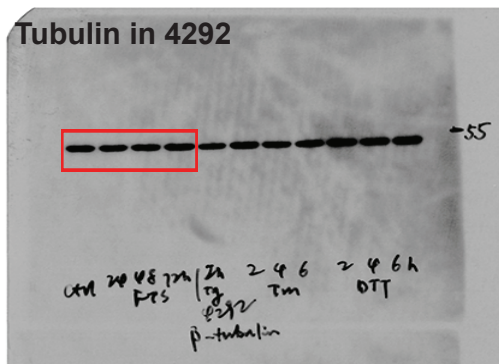

# Supplementary Figure S2 (Continued)

## Blots in Figure 3C

4292

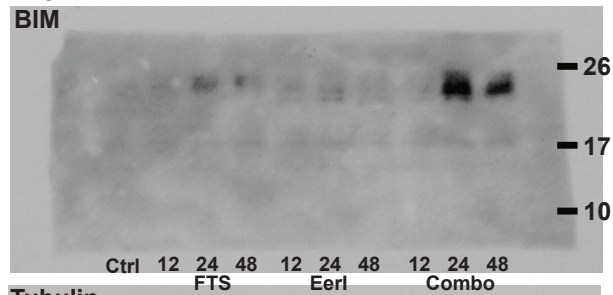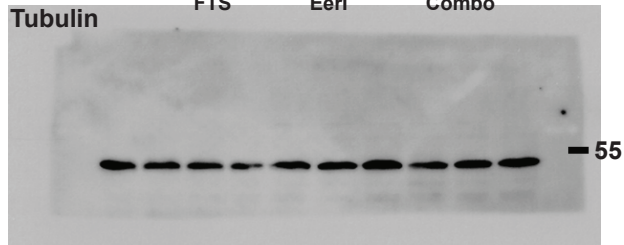

MiaPaca2

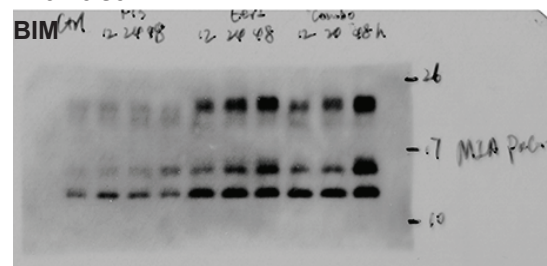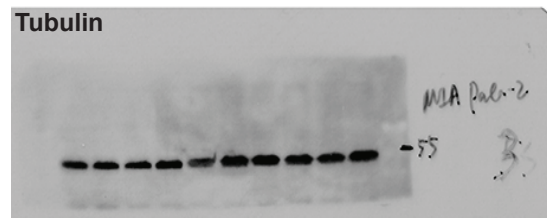

PANC-1

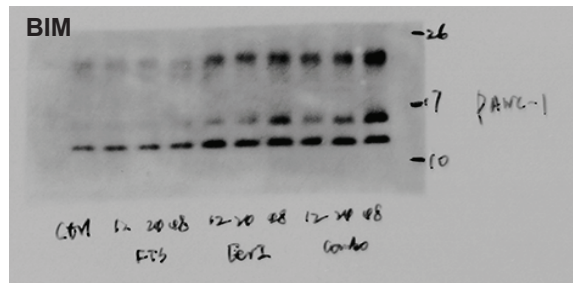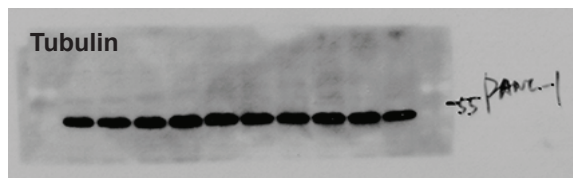



# Supplementary Figure S3

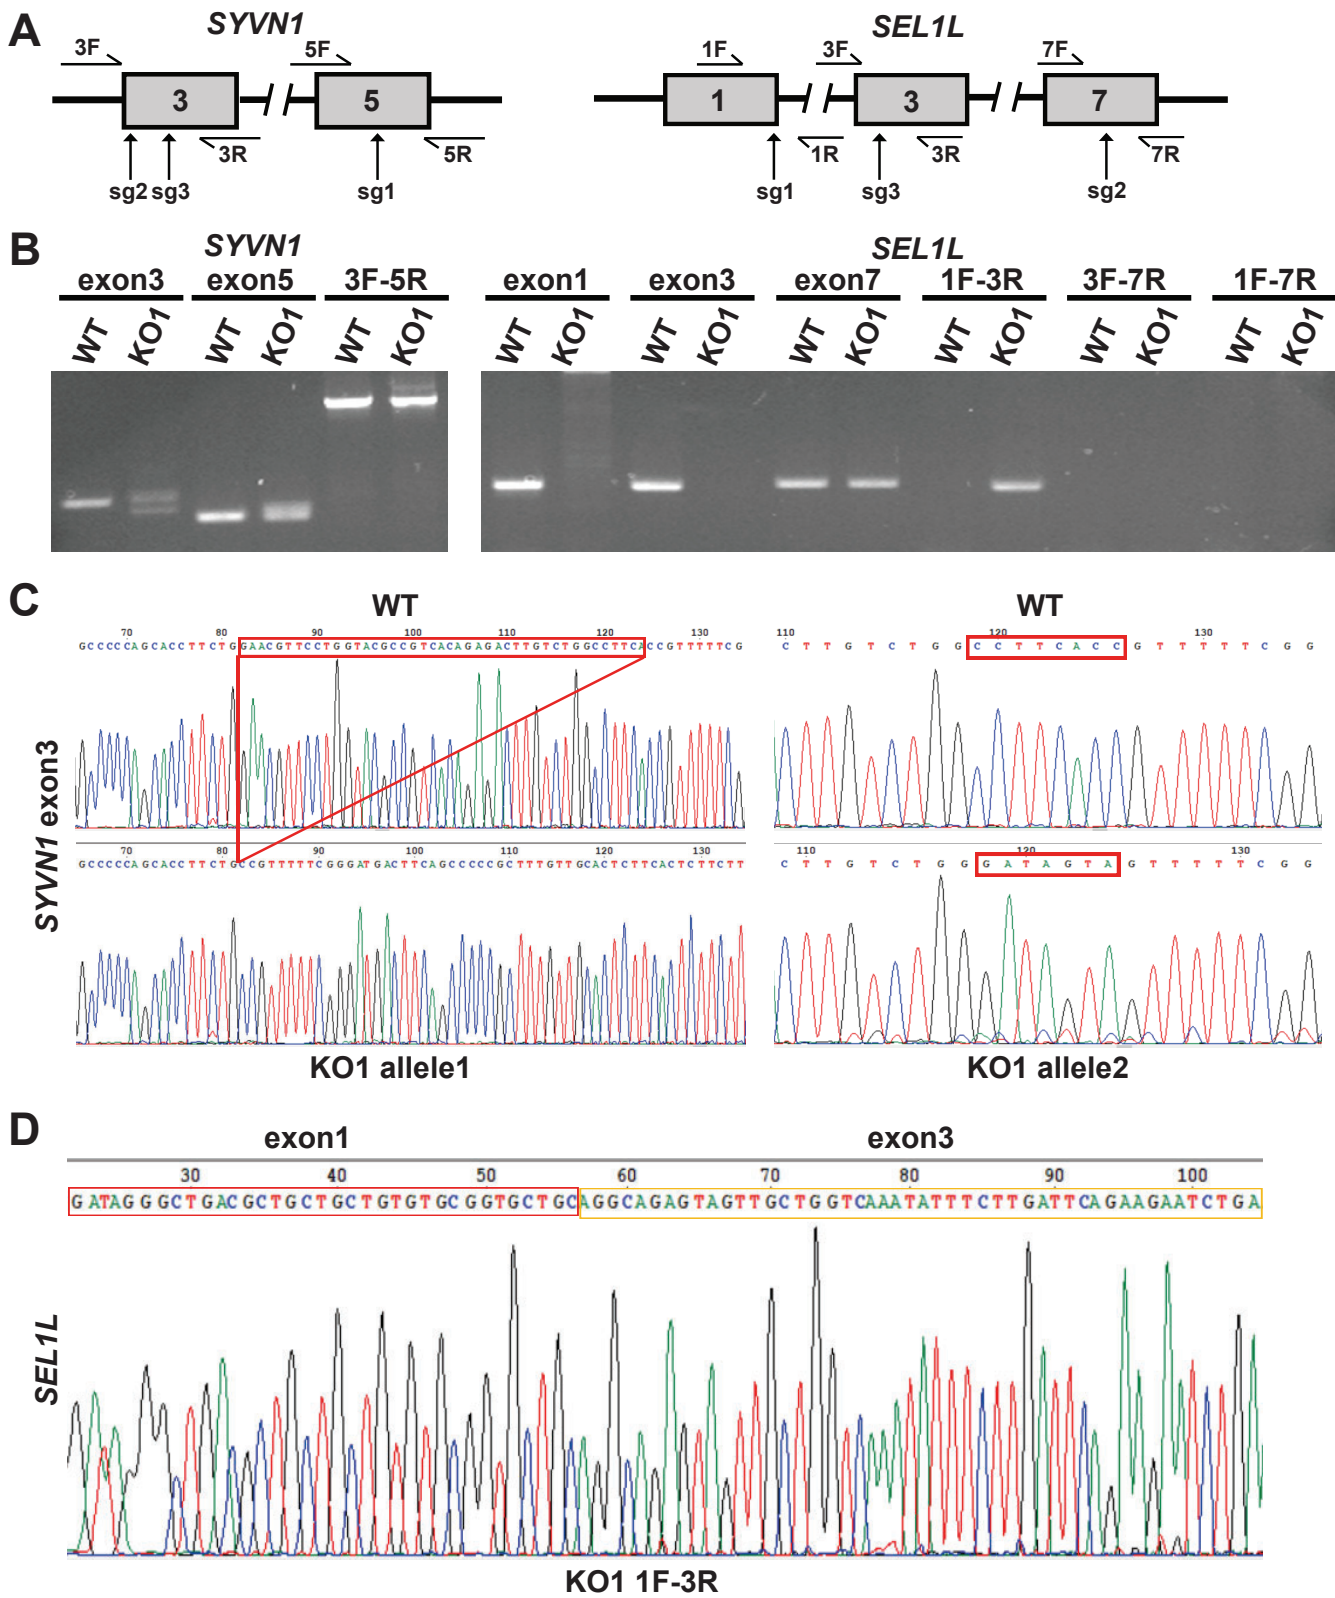

# Supplementary Figure S4

## Blots in Figure 4A

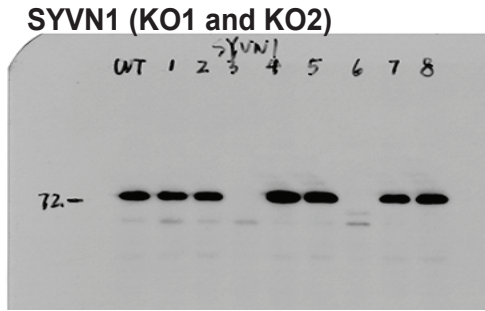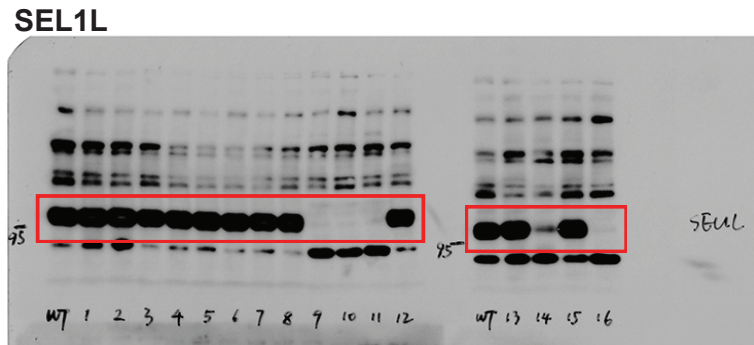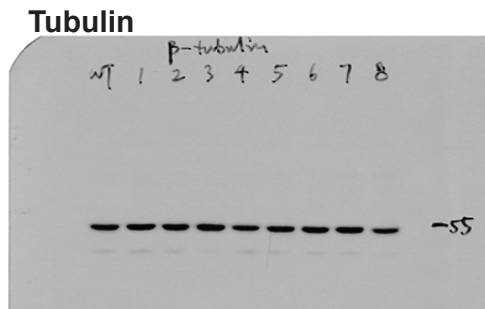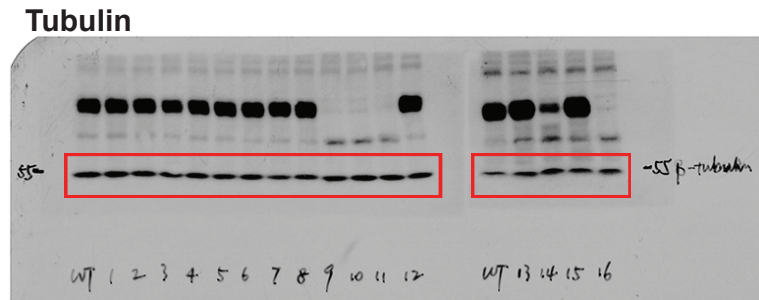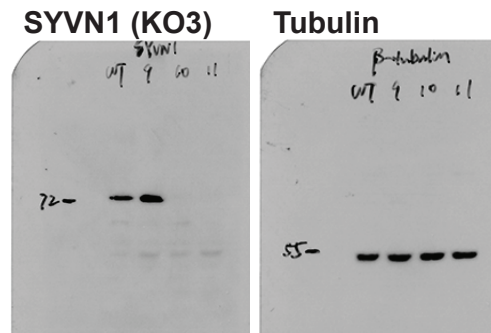

## Blots in Figure 4F

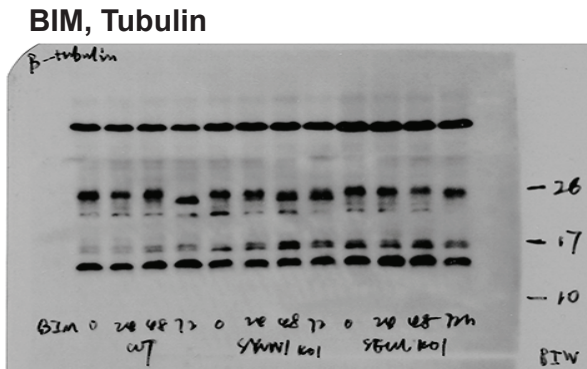

Supplement: 12885_2021_7967_MOESM1_ESM.pdf [file 12885_2021_7967_MOESM1_ESM.pdf]
