# Supplementary material for: Inhibition of ERAD synergizes with FTS to eradicate pancreatic cancer cells
Source: BMC Cancer. 2021 Mar 6;21:237. doi: 10.1186/s12885-021-07967-6 (PMC7937230; doi:10.1186/s12885-021-07967-6)
Supplement: Supplementary file 2 — Additional file 2: Supplementary Table 1. Genes rank based on their beta scores in ascending order from the FTS screen. Supplementary Table 2. GO pathway analysis of top candidate genes from FTS screen. Supplementary Table 3. The sequences of primers used in qPCR assay. Supplementary Table 4. sgRNA oligonucleotide sequences for SYVN1/SEL1L knockout. Supplementary Table 5. PCR primers used to validate genomic knockout of SYVN1 and SEL1L [file 12885_2021_7967_MOESM2_ESM.xlsx]

## Sheet: Table 1
Supplementary Table 1. Genes rank based on their beta scores in ascending order from the FTS screen.
Gene	beta	z	p-value	fdr	wald-p-value	wald-fdr
Kdsr	-2.3321	-6.5577	0	0	5.463e-11	5.6471e-07
Keap1	-1.6151	-6.7524	0	0	1.4542e-11	3.0064e-07
Ube2g2	-1.5083	-6.365	0	0	1.9527e-10	1.3457e-06
Sepsecs	-1.4594	-5.6338	0	0	1.7628e-08	9.1112e-05
Faf2	-1.4425	-5.0194	0	0	5.1842e-07	0.00076556
Acsl4	-1.4257	-5.1426	0	0	2.7102e-07	0.00062256
Ndufa1	-1.364	-5.2375	0	0	1.628e-07	0.00042072
Ogdh	-1.2989	-5.0222	0	0	5.1094e-07	0.00076556
Eefsec	-1.2499	-4.9591	0	0	7.0814e-07	0.000976
Tsc2	-1.1508	-5.5821	0	0	2.3757e-08	9.8229e-05
Syvn1	-1.1292	-5.2459	0	0	1.5552e-07	0.00042072
Eif4g2	-1.0978	-5.0691	0	0	3.9967e-07	0.00076556
Ndufs2	-1.0948	-4.0383	0	0	5.3836e-05	0.0265
Pcbp2	-1.0775	-5.0451	0	0	4.5332e-07	0.00076556
Tsc1	-1.0474	-5.2913	0	0	1.2143e-07	0.0004184
Bcl2l1	-1.0391	-4.7869	0	0	1.6941e-06	0.0020602
Ndufs1	-1.0052	-3.9105	0	0	9.2113e-05	0.03734
Dld	-0.9943	-4.0672	0	0	4.7576e-05	0.02399
Tmem261	-0.99369	-4.204	0	0	2.6224e-05	0.015945
Ndufb9	-0.99099	-4.2382	0	0	2.2536e-05	0.01456
Got2	-0.97759	-5.0443	0	0	4.5524e-07	0.00076556
Rtn4ip1	-0.97039	-4.492	0	0	7.0565e-06	0.0063429
Dlst	-0.96342	-4.4014	0	0	1.0755e-05	0.008894
Ndufa3	-0.94777	-3.6862	0	0	0.00022764	0.065364
Ndufa8	-0.93129	-3.8417	0	0	0.00012217	0.04517
Ndufv2	-0.89854	-4.3583	0	0	1.3106e-05	0.010036
Ndufb8	-0.8937	-3.9443	0	0	8.0019e-05	0.034465
Sel1l	-0.89004	-4.3238	0	0	1.5333e-05	0.010851
Isca1	-0.88608	-3.4965	0	0	0.00047144	0.10048
Aup1	-0.87473	-4.5599	0	0	5.1166e-06	0.005289
Ndufa13	-0.86845	-3.6658	0	0	0.00024652	0.06706
Cul5	-0.86175	-4.8409	0	0	1.2924e-06	0.0016699
Cul3	-0.85849	-4.4271	0	0	9.5512e-06	0.0082276
Sephs2	-0.84654	-4.3598	0	0	1.3017e-05	0.010036
Tmem30a	-0.83282	-3.9116	0	0	9.1675e-05	0.03734
Ndufb11	-0.82879	-3.7678	0	0	0.00016471	0.05225
Nprl3	-0.81939	-4.2818	0	0	1.8535e-05	0.012361
Rab7	-0.81107	-3.3367	0	0	0.00084783	0.14085
Sptlc2	-0.7923	-4.762	0	0	1.9173e-06	0.0022021
Ube2m	-0.78558	-3.9464	0	0	7.9321e-05	0.034465
Lias	-0.77794	-3.9449	0	0	7.9837e-05	0.034465
Tmed2	-0.76434	-4.5002	0	0	6.7884e-06	0.0063429
Ube2f	-0.76395	-4.5434	0	0	5.5342e-06	0.0054483
Ecsit	-0.76389	-3.5082	0	0	0.0004512	0.097167
Ndufa2	-0.76111	-3.2515	0	0	0.001148	0.16619
Ndufaf1	-0.75059	-2.7878	0	0	0.0053071	0.3877
Tmed10	-0.74325	-3.7415	0	0	0.00018294	0.054856
Tmem126b	-0.74278	-3.5907	0	0	0.00032976	0.078362
Urod	-0.72213	-4.3481	0	0	1.3734e-05	0.010141
Ndufa6	-0.72013	-3.32	0	0	0.00090029	0.14541
Pgrmc2	-0.71808	-4.1651	0	0	3.1118e-05	0.01693
Txnrd1	-0.71704	-3.5238	0	0	0.00042548	0.093579
Ndufc2	-0.70428	-3.5502	0	0	0.00038497	0.088433
Acsl3	-0.69814	-3.4007	0	0	0.0006722	0.12084
Mgat1	-0.68279	-4.1708	0	0	3.0353e-05	0.01693
Pstk	-0.68008	-3.5438	0	0	0.00039437	0.089595
Nprl2	-0.67795	-4.6108	0	0	4.0115e-06	0.004365
Ndufb2	-0.66724	-3.8891	0	0	0.0001006	0.039842
Derl2	-0.64909	-4.1699	0	0	3.0475e-05	0.01693
Ndufb6	-0.64551	-3.8407	0	0	0.00012269	0.04517
Opa1	-0.64267	-3.0042	0	0	0.0026626	0.28085
Ndufc1	-0.64196	-4.1315	0	0	3.6033e-05	0.019101
Ndufb4	-0.63975	-3.6903	0	0	0.00022401	0.065228
Snrnp35	-0.61806	-2.5529	0	0	0.010684	0.55591
Ndufa5	-0.61123	-3.2299	0	0	0.0012383	0.17534
Isca2	-0.60865	-3.0877	0	0	0.0020172	0.23648
Acaca	-0.60599	-3.6251	0	0	0.00028884	0.072208
Bcl2	-0.60328	-4.0306	0	0	5.5642e-05	0.026513
Golt1b	-0.60061	-2.173	0	0	0.029783	0.61247
Pik3r4	-0.59234	-2.4077	0	0	0.016051	0.58216
Arih1	-0.58548	-2.2222	0	0	0.02627	0.61153
Rnf7	-0.58534	-4.2154	0	0	2.4935e-05	0.015622
Pole2	-0.58406	-2.4277	0	0	0.015197	0.58216
Ankrd52	-0.58169	-4.0273	0	0	5.6428e-05	0.026513
Vps29	-0.58059	-4.1828	0	0	2.8796e-05	0.01693
Mcl1	-0.58014	-3.9785	0	0	6.9339e-05	0.031856
Gm561	-0.5767	-3.1435	0	0	0.0016692	0.21302
Depdc5	-0.56829	-3.919	0	0	8.8918e-05	0.03734
Uqcr10	-0.56282	-2.3079	9.674e-06	0.00022548	0.021004	0.59771
Alg5	-0.56252	-3.4655	9.674e-06	0.00022548	0.00052918	0.10622
Paxip1	-0.56031	-3.6735	9.674e-06	0.00022548	0.00023929	0.066977
Tceb2	-0.55834	-2.9364	9.674e-06	0.00022548	0.0033203	0.30945
Ndufb7	-0.54428	-2.9753	9.674e-06	0.00022548	0.0029268	0.29091
Kmt2d	-0.54197	-3.8855	9.674e-06	0.00022548	0.00010214	0.039842
Ndufs7	-0.5413	-2.5025	9.674e-06	0.00022548	0.012333	0.58094
Kif23	-0.53675	-2.297	9.674e-06	0.00022548	0.021621	0.6009
Cox17	-0.53299	-2.6383	9.674e-06	0.00022548	0.0083334	0.51736
E130309D02Rik	-0.53053	-3.6694	9.674e-06	0.00022548	0.00024311	0.067014
Mau2	-0.52783	-3.3946	9.674e-06	0.00022548	0.00068741	0.12147
Usp8	-0.52132	-2.5687	9.674e-06	0.00022548	0.010209	0.54723
Asun	-0.52003	-4.0787	9.674e-06	0.00022548	4.5286e-05	0.023406
Sdhb	-0.51656	-3.7897	9.674e-06	0.00022548	0.00015085	0.051753
Puf60	-0.51344	-1.5065	9.674e-06	0.00022548	0.13193	0.67959
Stag2	-0.51236	-4.318	9.674e-06	0.00022548	1.5746e-05	0.010851
Alg1	-0.51138	-1.9906	9.674e-06	0.00022548	0.046523	0.61574
Acad9	-0.51104	-3.3526	9.674e-06	0.00022548	0.00080057	0.13566
Uqcrfs1	-0.50545	-3.0753	9.674e-06	0.00022548	0.0021032	0.24023
Ndufb10	-0.49544	-2.9008	9.674e-06	0.00022548	0.0037224	0.32656
Pkmyt1	-0.49359	-2.8664	9.674e-06	0.00022548	0.0041513	0.34057
Sdha	-0.49359	-3.4158	9.674e-06	0.00022548	0.00063589	0.11634
Vps52	-0.49219	-3.8249	9.674e-06	0.00022548	0.00013081	0.046139
Nfyc	-0.49048	-2.6914	9.674e-06	0.00022548	0.0071163	0.46705
Smg9	-0.48923	-3.7583	9.674e-06	0.00022548	0.00017107	0.052788
Uqcrq	-0.48828	-2.2725	9.674e-06	0.00022548	0.023056	0.6009
Vps18	-0.48435	-3.673	9.674e-06	0.00022548	0.00023974	0.066977
A230046K03Rik	-0.48352	-3.7772	9.674e-06	0.00022548	0.00015861	0.05205
Sptlc1	-0.48066	-3.6182	9.674e-06	0.00022548	0.00029667	0.072208
Cept1	-0.47972	-2.4844	9.674e-06	0.00022548	0.012976	0.58216
Pmm2	-0.47957	-3.7377	9.674e-06	0.00022548	0.00018574	0.054856
Usmg5	-0.4774	-3.1027	9.674e-06	0.00022548	0.0019174	0.23441
Ppm1f	-0.47577	-3.4206	9.674e-06	0.00022548	0.00062483	0.11534
Iba57	-0.47494	-3.113	9.674e-06	0.00022548	0.0018519	0.23064
Ndufs5	-0.47327	-2.4585	9.674e-06	0.00022548	0.013953	0.58216
Vps11	-0.46928	-3.2511	9.674e-06	0.00022548	0.0011495	0.16619
Slc35a2	-0.4681	-3.6296	9.674e-06	0.00022548	0.00028385	0.072208
Bap1	-0.46732	-2.9772	9.674e-06	0.00022548	0.0029088	0.29091
Wsb2	-0.46135	-3.4672	9.674e-06	0.00022548	0.00052588	0.10622
Sod2	-0.45851	-3.0801	9.674e-06	0.00022548	0.0020691	0.23834
Vwa9	-0.45576	-3.6199	9.674e-06	0.00022548	0.00029475	0.072208
Klf6	-0.45539	-3.5686	9.674e-06	0.00022548	0.00035895	0.083382
Chchd1	-0.45452	-2.8051	9.674e-06	0.00022548	0.0050305	0.37545
Slc25a19	-0.4541	-3.7711	9.674e-06	0.00022548	0.00016255	0.05225
Egfr	-0.44731	-2.706	1.9348e-05	0.00043057	0.0068091	0.45958
March5	-0.44646	-3.7646	1.9348e-05	0.00043057	0.00016681	0.05225
Pcyt1a	-0.43754	-1.2952	1.9348e-05	0.00043057	0.19527	0.72594
Usp34	-0.43721	-3.4427	1.9348e-05	0.00043057	0.00057598	0.11278
Prrc2c	-0.43117	-3.5242	1.9348e-05	0.00043057	0.00042484	0.093579
Pcyt2	-0.43049	-3.2476	1.9348e-05	0.00043057	0.0011639	0.1671
Fh1	-0.42837	-3.6228	1.9348e-05	0.00043057	0.00029146	0.072208
Ddb1	-0.42829	-1.722	1.9348e-05	0.00043057	0.085073	0.66174
Snrpb	-0.4277	-1.0835	1.9348e-05	0.00043057	0.27858	0.76618
Ints10	-0.42739	-3.3355	1.9348e-05	0.00043057	0.0008516	0.14085
Rpa1	-0.42566	-1.708	1.9348e-05	0.00043057	0.087641	0.6618
Gbf1	-0.42362	-1.8808	1.9348e-05	0.00043057	0.060006	0.6305
Naa30	-0.42074	-2.9621	1.9348e-05	0.00043057	0.0030558	0.30012
Tfap4	-0.42018	-3.4661	1.9348e-05	0.00043057	0.00052799	0.10622
Alg3	-0.41879	-3.837	1.9348e-05	0.00043057	0.00012454	0.04517
Ilk	-0.41675	-3.3207	1.9348e-05	0.00043057	0.000898	0.14541
Sdhd	-0.41675	-2.9371	1.9348e-05	0.00043057	0.0033126	0.30945
Alg9	-0.41436	-3.0692	1.9348e-05	0.00043057	0.0021463	0.24247
Afg3l2	-0.41421	-3.4277	1.9348e-05	0.00043057	0.00060883	0.11457
Wee1	-0.41012	-1.5583	1.9348e-05	0.00043057	0.11916	0.67563
Cnbp	-0.4087	-3.4273	1.9348e-05	0.00043057	0.0006096	0.11457
Preb	-0.40553	-1.5033	1.9348e-05	0.00043057	0.13277	0.67959
Ndufb5	-0.40475	-2.1301	1.9348e-05	0.00043057	0.033164	0.61574
Stip1	-0.40227	-3.514	1.9348e-05	0.00043057	0.00044149	0.096077
Fitm2	-0.4014	-3.8592	1.9348e-05	0.00043057	0.00011377	0.043558
Vps16	-0.40072	-2.8831	1.9348e-05	0.00043057	0.0039376	0.33779
Pdap1	-0.40038	-3.5746	1.9348e-05	0.00043057	0.00035073	0.082398
Cdc23	-0.3997	-1.3709	1.9348e-05	0.00043057	0.1704	0.70679
Cox6b1	-0.39923	-3.2185	1.9348e-05	0.00043057	0.0012888	0.18126
Smg8	-0.39717	-3.3626	1.9348e-05	0.00043057	0.00077212	0.13192
Commd6	-0.3946	-3.7866	1.9348e-05	0.00043057	0.0001527	0.051753
Mon2	-0.39159	-3.4416	1.9348e-05	0.00043057	0.00057823	0.11278
Arih2	-0.3909	-3.1518	1.9348e-05	0.00043057	0.0016224	0.21276
Med21	-0.39086	-2.1313	1.9348e-05	0.00043057	0.033061	0.61574
Upf1	-0.38995	-1.8821	1.9348e-05	0.00043057	0.059819	0.6305
Cox11	-0.3895	-2.44	1.9348e-05	0.00043057	0.014687	0.58216
Sirt6	-0.3845	-3.3147	1.9348e-05	0.00043057	0.00091754	0.14592
Kctd5	-0.38395	-3.8233	1.9348e-05	0.00043057	0.00013167	0.046139
Cdx2	-0.38093	-2.9819	1.9348e-05	0.00043057	0.0028645	0.29091
Gnas	-0.37588	-3.0589	2.9022e-05	0.00060423	0.0022217	0.24563
Foxred1	-0.3749	-3.0881	2.9022e-05	0.00060423	0.0020142	0.23648
Tiparp	-0.37481	-3.6061	2.9022e-05	0.00060423	0.00031082	0.07472
Ndufa11	-0.37462	-2.6884	2.9022e-05	0.00060423	0.0071791	0.46968
Cdc42	-0.37417	-2.5753	2.9022e-05	0.00060423	0.010015	0.54369
Ndufaf2	-0.374	-3.739	2.9022e-05	0.00060423	0.00018472	0.054856
Dpm1	-0.3733	-1.8186	2.9022e-05	0.00060423	0.068979	0.63838
Ppp6c	-0.37248	-2.3866	2.9022e-05	0.00060423	0.017005	0.58216
Ndufb3	-0.36996	-2.1815	2.9022e-05	0.00060423	0.029145	0.61153
Esrra	-0.36974	-3.629	3.8696e-05	0.00077295	0.00028452	0.072208
Ufd1l	-0.36518	-1.158	3.8696e-05	0.00077295	0.24685	0.7507
Yae1d1	-0.36475	-1.8414	3.8696e-05	0.00077295	0.065565	0.63519
Sdhc	-0.36426	-2.6226	3.8696e-05	0.00077295	0.0087266	0.51977
Naa35	-0.36366	-2.1617	3.8696e-05	0.00077295	0.030641	0.61574
Jtb	-0.36363	-3.5404	3.8696e-05	0.00077295	0.00039959	0.089794
Wash1	-0.36261	-3.3152	3.8696e-05	0.00077295	0.00091579	0.14592
Commd8	-0.36255	-3.3809	3.8696e-05	0.00077295	0.00072246	0.12551
Arf1	-0.35857	-3.0866	3.8696e-05	0.00077295	0.0020247	0.23648
Eef1g	-0.35827	-1.5933	3.8696e-05	0.00077295	0.11108	0.67109
Zfp217	-0.35677	-3.4831	3.8696e-05	0.00077295	0.00049561	0.10455
E2f8	-0.3559	-3.7781	3.8696e-05	0.00077295	0.00015801	0.05205
Zfp281	-0.35564	-3.2972	3.8696e-05	0.00077295	0.00097665	0.14956
Srebf1	-0.35476	-2.8945	3.8696e-05	0.00077295	0.0037973	0.32986
Srsf5	-0.35472	-3.3099	3.8696e-05	0.00077295	0.00093316	0.14615
Ndc80	-0.3522	-1.266	3.8696e-05	0.00077295	0.20552	0.72874
Ptpn23	-0.35191	-3.3237	3.8696e-05	0.00077295	0.00088847	0.14541
Vps33a	-0.35061	-2.6758	3.8696e-05	0.00077295	0.0074554	0.47838
Lipt1	-0.34821	-2.9705	3.8696e-05	0.00077295	0.0029729	0.29408
Sptssa	-0.3469	-2.4201	3.8696e-05	0.00077295	0.015518	0.58216
Cbfb	-0.34592	-3.3113	3.8696e-05	0.00077295	0.00092864	0.14615
Ago2	-0.34497	-2.9785	3.8696e-05	0.00077295	0.0028963	0.29091
Cog7	-0.34401	-3.1437	3.8696e-05	0.00077295	0.0016684	0.21302
Ndufs8	-0.34283	-1.8132	3.8696e-05	0.00077295	0.069796	0.63838
Myeov2	-0.34219	-2.996	3.8696e-05	0.00077295	0.0027353	0.28561
Akt1s1	-0.3421	-3.0064	3.8696e-05	0.00077295	0.0026437	0.28028
Anapc11	-0.3408	-1.6236	3.8696e-05	0.00077295	0.10446	0.66487
Uqcrb	-0.3398	-1.7014	3.8696e-05	0.00077295	0.088866	0.6618
Lipt2	-0.33695	-3.3876	3.8696e-05	0.00077295	0.00070518	0.12355
Klhl20	-0.33625	-3.1475	3.8696e-05	0.00077295	0.0016466	0.21276
Atxn7l3	-0.33489	-3.2761	3.8696e-05	0.00077295	0.0010526	0.15769
Sarnp	-0.33292	-3.1012	3.8696e-05	0.00077295	0.0019275	0.23441
Srsf1	-0.33192	-0.90181	3.8696e-05	0.00077295	0.36716	0.81046
Grk6	-0.33145	-3.618	3.8696e-05	0.00077295	0.00029688	0.072208
Cox5b	-0.33112	-2.173	3.8696e-05	0.00077295	0.029784	0.61247
Ctdspl2	-0.32888	-3.4119	5.8044e-05	0.0011194	0.00064504	0.11698
Rbm14	-0.32801	-1.997	5.8044e-05	0.0011194	0.04583	0.61574
Alg10b	-0.32662	-2.8398	5.8044e-05	0.0011194	0.0045137	0.35617
Sfpq	-0.32613	-2.3805	5.8044e-05	0.0011194	0.017288	0.58216
Mrps18a	-0.32182	-1.6538	6.7718e-05	0.0012797	0.098159	0.66405
Rfc4	-0.32122	-1.2802	6.7718e-05	0.0012797	0.20046	0.72777
Srp72	-0.32055	-2.4272	6.7718e-05	0.0012797	0.015215	0.58216
Ndufaf7	-0.32005	-2.3676	6.7718e-05	0.0012797	0.017902	0.58216
Ets2	-0.31972	-3.43	6.7718e-05	0.0012797	0.00060361	0.11457
Ccz1	-0.3186	-3.6389	6.7718e-05	0.0012797	0.00027384	0.072208
Pmvk	-0.31753	-2.7951	6.7718e-05	0.0012797	0.0051886	0.3831
Dhx36	-0.31657	-2.631	6.7718e-05	0.0012797	0.0085136	0.51949
Ndufaf4	-0.31506	-2.8765	6.7718e-05	0.0012797	0.0040209	0.33889
Cnot1	-0.31447	-1.2472	6.7718e-05	0.0012797	0.21232	0.73499
Cox7b	-0.31447	-2.0603	6.7718e-05	0.0012797	0.039367	0.61574
Rps9	-0.31374	-1.1452	6.7718e-05	0.0012797	0.25211	0.75223
Casc3	-0.31351	-3.423	6.7718e-05	0.0012797	0.00061945	0.11534
Smg1	-0.31152	-1.3311	6.7718e-05	0.0012797	0.18314	0.71787
Mrpl44	-0.31067	-2.1831	6.7718e-05	0.0012797	0.029026	0.61153
Ndufs6	-0.31058	-3.3635	6.7718e-05	0.0012797	0.00076952	0.13192
Hist1h2bk	-0.3092	-0.66419	6.7718e-05	0.0012797	0.50657	0.8631
Traf3	-0.30915	-2.8178	6.7718e-05	0.0012797	0.0048348	0.36892
Dpm2	-0.30753	-2.5523	6.7718e-05	0.0012797	0.010702	0.55591
Pagr1a	-0.30635	-3.0436	7.7392e-05	0.0014388	0.0023374	0.25433
Cnep1r1	-0.30518	-3.1593	8.7066e-05	0.0016086	0.0015817	0.21204
Ubiad1	-0.30509	-3.2409	8.7066e-05	0.0016086	0.0011916	0.1699
Sec22b	-0.30472	-2.7016	8.7066e-05	0.0016086	0.0069013	0.46157
Commd3	-0.30444	-3.1364	8.7066e-05	0.0016086	0.0017104	0.21694
Prrc2a	-0.30401	-3.2544	8.7066e-05	0.0016086	0.0011365	0.16619
Atp5k	-0.30386	-1.9881	8.7066e-05	0.0016086	0.046799	0.61574
Mpdu1	-0.30271	-2.3661	9.674e-05	0.0017197	0.017977	0.58216
Supt20	-0.30267	-2.1164	9.674e-05	0.0017197	0.034312	0.61574
Tsc22d2	-0.30246	-2.8362	9.674e-05	0.0017197	0.0045648	0.35747
Daxx	-0.30198	-2.8705	9.674e-05	0.0017197	0.004098	0.33889
Ppp2r3c	-0.30128	-1.4615	9.674e-05	0.0017197	0.14389	0.68654
Cnot11	-0.30111	-3.3434	9.674e-05	0.0017197	0.00082769	0.13912
Txndc17	-0.30108	-2.5041	9.674e-05	0.0017197	0.012275	0.58094
Timmdc1	-0.30023	-2.7542	9.674e-05	0.0017197	0.0058842	0.41661
Ccdc22	-0.3002	-2.7823	9.674e-05	0.0017197	0.0053972	0.39152
Rbm39	-0.30001	-1.5774	9.674e-05	0.0017197	0.11471	0.6729
Cmip	-0.29977	-2.9592	9.674e-05	0.0017197	0.0030845	0.30079
Lrpprc	-0.29948	-2.8953	9.674e-05	0.0017197	0.0037877	0.32986
Hsp90ab1	-0.29875	-2.8689	0.00010641	0.0018676	0.0041184	0.33922
Ndufs3	-0.2975	-1.876	0.00010641	0.0018676	0.060656	0.6309
Ubtf	-0.29722	-1.1465	0.00010641	0.0018676	0.25159	0.75223
Ahctf1	-0.29712	-1.1863	0.00010641	0.0018676	0.23552	0.74725
Szt2	-0.29615	-2.8715	0.00010641	0.0018676	0.0040847	0.33889
E430025E21Rik	-0.29604	-2.1464	0.00010641	0.0018676	0.031845	0.61574
Cebpb	-0.29568	-2.9613	0.00010641	0.0018676	0.003063	0.30012
Osbpl8	-0.29545	-3.6244	0.00010641	0.0018676	0.00028965	0.072208
Zfp36l2	-0.2951	-3.4569	0.00010641	0.0018676	0.00054639	0.10862
Chordc1	-0.29488	-0.89007	0.00010641	0.0018676	0.37343	0.81312
Cox6c	-0.29488	-2.8504	0.00010641	0.0018676	0.004366	0.3485
Bcap31	-0.29409	-1.8289	0.00010641	0.0018676	0.067417	0.6373
Rarg	-0.2935	-3.2937	0.00010641	0.0018676	0.00098866	0.15029
Pi4kb	-0.29301	-3.088	0.00010641	0.0018676	0.0020148	0.23648
Cyc1	-0.29133	-1.877	0.00013544	0.0023649	0.06052	0.6309
Dyrk1a	-0.2912	-3.1709	0.00013544	0.0023649	0.0015198	0.20536
Trappc13	-0.29024	-2.873	0.00013544	0.0023649	0.0040663	0.33889
Tceb1	-0.28972	-2.2498	0.00014511	0.0025274	0.024464	0.6027
Ubr2	-0.28968	-3.1772	0.00014511	0.0025274	0.0014868	0.20223
Sec63	-0.28885	-2.2801	0.00017413	0.002963	0.022604	0.6009
BC048403	-0.28806	-3.2019	0.00017413	0.002963	0.0013654	0.18946
Brap	-0.28742	-3.4306	0.00017413	0.002963	0.00060235	0.11457
Cdk5	-0.2873	-3.1578	0.00017413	0.002963	0.0015898	0.21204
Ube2j1	-0.28718	-2.8798	0.00017413	0.002963	0.0039788	0.33889
Ptchd4	-0.28617	-1.5648	0.00018381	0.0031199	0.11763	0.67563
Ctage5	-0.28132	-2.5336	0.00021283	0.0035599	0.01129	0.56529
Dscr3	-0.27952	-2.7298	0.00023218	0.0038278	0.0063365	0.4396
1810043H04Rik	-0.27894	-2.2237	0.00023218	0.0038278	0.026168	0.61153
Hgs	-0.27894	-1.5159	0.00023218	0.0038278	0.12954	0.67959
Erbb2	-0.27887	-2.2328	0.00023218	0.0038278	0.02556	0.61153
Ddx41	-0.27859	-1.0867	0.00023218	0.0038278	0.27715	0.76531
Btbd7	-0.277	-2.587	0.00025152	0.0041434	0.0096811	0.53659
Commd4	-0.27602	-1.3716	0.00027087	0.0044269	0.17019	0.70679
Senp1	-0.27575	-2.6614	0.00027087	0.0044269	0.0077819	0.49503
Atp5sl	-0.27545	-2.4744	0.00027087	0.0044269	0.013346	0.58216
Cars2	-0.27379	-2.081	0.00029989	0.0048475	0.037438	0.61574
Ylpm1	-0.27199	-2.4	0.00030957	0.0049922	0.016396	0.58216
Gm14345	-0.27194	-1.6441	0.00030957	0.0049922	0.10016	0.66445
Dad1	-0.27187	-1.0333	0.00030957	0.0049922	0.30147	0.7779
Eif5b	-0.27049	-2.1549	0.00031924	0.0051163	0.031171	0.61574
Dusp10	-0.26889	-2.4605	0.00033859	0.0053722	0.013873	0.58216
Fdx1	-0.26852	-2.916	0.00034826	0.0055088	0.0035457	0.31872
Ptges3	-0.268	-2.5849	0.00034826	0.0055088	0.0097416	0.53752
Timm23	-0.26796	-0.93158	0.00034826	0.0055088	0.35155	0.80363
Ncoa6	-0.2677	-2.7994	0.00034826	0.0055088	0.0051202	0.37941
Zic2	-0.26752	-3.2982	0.00035794	0.0056532	0.00097307	0.14956
Fam178a	-0.26689	-2.6372	0.00036761	0.0057795	0.0083582	0.51736
Agps	-0.2664	-2.3846	0.00037729	0.0059091	0.0171	0.58216
Cap2	-0.26636	-1.3109	0.00037729	0.0059091	0.18989	0.72201
Stk35	-0.26633	-3.1044	0.00037729	0.0059091	0.0019065	0.23441
Zfp148	-0.26581	-2.3111	0.00038696	0.006056	0.020828	0.59771
Skint7	-0.26543	-2.8514	0.00040631	0.0062921	0.0043528	0.3485
Rfc3	-0.264	-1.2046	0.00040631	0.0062921	0.22837	0.7446
Dynll1	-0.26369	-2.9897	0.00042566	0.0065525	0.0027927	0.28725
Tmem69	-0.2636	-2.4721	0.00042566	0.0065525	0.013431	0.58216
Lsm1	-0.26354	-2.5702	0.00042566	0.0065525	0.010163	0.54723
Crebbp	-0.26344	-3.2977	0.00042566	0.0065525	0.00097468	0.14956
Tk1	-0.2634	-2.8508	0.00043533	0.0066766	0.0043607	0.3485
Hexim1	-0.26178	-2.2883	0.000445	0.0068148	0.02212	0.6009
Tfg	-0.26136	-3.0598	0.00045468	0.0069373	0.002215	0.24563
Fus	-0.26064	-3.4658	0.00045468	0.0069373	0.00052859	0.10622
Tmem259	-0.26039	-1.9786	0.00047403	0.0071848	0.047864	0.61574
Blzf1	-0.26031	-2.1178	0.00047403	0.0071848	0.034196	0.61574
9030624J02Rik	-0.25977	-2.9928	0.00049337	0.0074344	0.0027646	0.28578
Plekhh3	-0.2597	-2.9248	0.00049337	0.0074344	0.0034473	0.31535
Acin1	-0.25933	-2.6073	0.00049337	0.0074344	0.0091268	0.52413
Pex5	-0.25863	-2.9533	0.00051272	0.0076369	0.0031443	0.30228
Bhlhe40	-0.25802	-2.9011	0.0005224	0.0077586	0.0037181	0.32656
Srsf11	-0.25766	-1.7918	0.0005224	0.0077586	0.073169	0.64237
Shc1	-0.25686	-2.3144	0.0005224	0.0077586	0.020644	0.59771
Vps35	-0.2564	-2.1452	0.0005224	0.0077586	0.031933	0.61574
Clk3	-0.25601	-3.1222	0.00053207	0.0078515	0.0017951	0.22629
Ccdc93	-0.25587	-2.9563	0.00053207	0.0078515	0.0031139	0.30224
Rtn4	-0.25584	-3.1523	0.00053207	0.0078515	0.0016197	0.21276
Kctd10	-0.25527	-1.4399	0.00053207	0.0078515	0.1499	0.69127
Ccdc53	-0.25345	-2.3936	0.00059979	0.0087324	0.016682	0.58216
2310011J03Rik	-0.25341	-0.9715	0.00059979	0.0087324	0.3313	0.79099
Camsap2	-0.25337	-2.3688	0.00060946	0.0088608	0.017844	0.58216
Chmp5	-0.25289	-2.1522	0.00061914	0.0089573	0.03138	0.61574
Olfr1048	-0.25251	-1.1189	0.00062881	0.0090719	0.26317	0.75798
Ankle2	-0.25243	-1.1501	0.00062881	0.0090719	0.25009	0.75128
Senp3	-0.25233	-2.8288	0.00063848	0.0091922	0.0046729	0.36183
Klhl42	-0.25222	-2.7897	0.00063848	0.0091922	0.0052752	0.38674
Ppp1cb	-0.25213	-0.88727	0.00063848	0.0091922	0.37494	0.81328
Vps51	-0.25105	-2.7723	0.00065783	0.0094576	0.0055668	0.40202
Mrpl45	-0.25036	-1.2535	0.00067718	0.0096953	0.21002	0.73324
Mrpl40	-0.25009	-1.0898	0.00067718	0.0096953	0.27578	0.76516
Rras2	-0.25001	-2.8716	0.00067718	0.0096953	0.0040842	0.33889
Dcun1d1	-0.24981	-2.4302	0.00067718	0.0096953	0.015092	0.58216
Akap14	-0.24963	-2.936	0.00067718	0.0096953	0.0033247	0.30945
Uqcrc1	-0.24867	-1.0715	0.0007449	0.010606	0.28393	0.76893
Lim2	-0.24844	-2.0391	0.0007449	0.010606	0.041438	0.61574
2410127L17Rik	-0.24774	-2.9003	0.00075457	0.010692	0.0037278	0.32656
Ndufaf5	-0.24752	-2.8539	0.00075457	0.010692	0.0043184	0.3485
Slc7a11	-0.24698	-2.4002	0.00077392	0.010914	0.016387	0.58216
Iqgap1	-0.24696	-3.0481	0.00077392	0.010914	0.0023032	0.25328
Klc1	-0.24687	-2.8016	0.00077392	0.010914	0.0050856	0.3782
Col4a3bp	-0.24683	-2.8157	0.00078359	0.011028	0.0048666	0.36892
Dnaja1	-0.24679	-2.5817	0.00078359	0.011028	0.0098325	0.5392
Pex3	-0.24643	-2.7031	0.00078359	0.011028	0.0068692	0.46108
Sys1	-0.24597	-1.7036	0.00079327	0.011149	0.088464	0.6618
Polr2a	-0.24405	-1.1222	0.00085131	0.011924	0.26177	0.75744
Foxp1	-0.24377	-3.2732	0.00086098	0.012003	0.0010633	0.15815
Slc25a1	-0.24339	-3.0349	0.00088033	0.012256	0.0024059	0.25906
Safb	-0.24265	-2.6757	0.00090935	0.012584	0.0074572	0.47838
Cks1b	-0.24258	-1.8163	0.00090935	0.012584	0.069326	0.63838
Col8a1	-0.24239	-1.8383	0.00091903	0.012692	0.066021	0.63519
Dusp28	-0.24229	-1.2191	0.0009287	0.012774	0.22279	0.73989
Cog5	-0.24206	-2.6508	0.0009287	0.012774	0.0080297	0.50458
Fibp	-0.24204	-3.1486	0.0009287	0.012774	0.0016406	0.21276
Tbc1d10b	-0.24197	-2.2705	0.0009287	0.012774	0.023177	0.6009
Abhd16a	-0.24183	-2.9145	0.00094805	0.01298	0.0035629	0.31887
Snx17	-0.24141	-3.2114	0.0009674	0.013158	0.0013209	0.18452
Cog6	-0.2412	-2.9868	0.00097707	0.013281	0.0028188	0.2885
Fgfr1	-0.24075	-0.90548	0.00099642	0.013455	0.36521	0.80934
Rad21	-0.24032	-1.9743	0.00099642	0.013455	0.04835	0.61574
Bcor	-0.23949	-3.0391	0.0010351	0.013923	0.0023728	0.25683
Stub1	-0.23938	-2.3866	0.0010351	0.013923	0.017005	0.58216
Cnot2	-0.23894	-1.9235	0.0010448	0.014017	0.054412	0.62133
Cenpn	-0.23869	-1.9445	0.0010545	0.014137	0.051832	0.61869
Pak2	-0.23782	-2.3601	0.0011319	0.015068	0.018271	0.58382
Serac1	-0.23763	-2.2527	0.0011415	0.015138	0.024279	0.6027
Pik3c3	-0.23757	-1.8293	0.0011415	0.015138	0.067348	0.63723
Commd5	-0.23751	-2.2338	0.0011415	0.015138	0.025497	0.61153
Zfp598	-0.23742	-3.1155	0.0011512	0.015247	0.0018365	0.23011
Chd2	-0.23677	-3.199	0.0011609	0.015345	0.0013791	0.19007
Vim	-0.23559	-3.1481	0.0012092	0.015863	0.0016433	0.21276
Gimap6	-0.23551	-2.8706	0.0012092	0.015863	0.0040966	0.33889
Atp5o	-0.23535	-1.885	0.0012092	0.015863	0.059424	0.62998
Erh	-0.2352	-1.1164	0.0012189	0.015959	0.26426	0.75853
Selo	-0.23519	-2.9264	0.0012189	0.015959	0.0034288	0.31505
Hsd17b12	-0.23509	-2.5652	0.0012189	0.015959	0.010313	0.54952
Kcne2	-0.23477	-2.6108	0.0012479	0.016278	0.0090327	0.52258
Mapk3	-0.23475	-2.8549	0.0012479	0.016278	0.0043056	0.3485
Gpkow	-0.23436	-1.7325	0.0012673	0.016499	0.083189	0.65543
Asb6	-0.23416	-2.913	0.0012866	0.016719	0.0035794	0.31897
Olfr437	-0.23415	-2.1337	0.0012866	0.016719	0.032864	0.61574
Lsm7	-0.23381	-1.256	0.0013157	0.017075	0.20911	0.73202
Deb1	-0.23296	-1.5471	0.0013544	0.017478	0.12184	0.67661
Mrpl23	-0.23289	-1.3734	0.0013544	0.017478	0.16962	0.70679
Il2rb	-0.23198	-0.92455	0.0014027	0.018012	0.3552	0.80555
Mprip	-0.23189	-2.3247	0.0014027	0.018012	0.02009	0.59771
Supt5	-0.23168	-1.0363	0.0014124	0.018114	0.30004	0.77696
Krt27	-0.23165	-2.4011	0.0014124	0.018114	0.016346	0.58216
Ice2	-0.23111	-3.2683	0.0014704	0.018765	0.0010818	0.15976
Sec31a	-0.23061	-2.381	0.0015091	0.019141	0.017266	0.58216
Fgf3	-0.23055	-1.4792	0.0015091	0.019141	0.1391	0.68243
Alg12	-0.23051	-2.7006	0.0015285	0.019351	0.006921	0.46157
Samd1	-0.23011	-2.7671	0.0015478	0.01956	0.0056565	0.40605
Ash2l	-0.22996	-2.7628	0.0015672	0.019768	0.0057302	0.4085
Morc3	-0.22967	-2.8522	0.0015769	0.019866	0.0043414	0.3485
Gm10228	-0.22945	-2.9279	0.0015769	0.019866	0.003413	0.315
Pex10	-0.22931	-3.0455	0.0015865	0.019951	0.0023229	0.25409
Carhsp1	-0.22797	-3.4798	0.0016833	0.021091	0.00050173	0.10477
Nup133	-0.22794	-1.5546	0.0016929	0.021174	0.12004	0.67563
Nme6	-0.22778	-2.5483	0.0017026	0.021269	0.010826	0.55759
Fastkd1	-0.22728	-3.0296	0.0017413	0.021739	0.0024489	0.26098
Ube4b	-0.22698	-2.9058	0.0017703	0.022061	0.0036635	0.32507
Mgat2	-0.22647	-2.8328	0.0018477	0.022915	0.0046145	0.36
Kdm2a	-0.22611	-3.2905	0.0018768	0.023234	0.00099995	0.1509
Dgkq	-0.22575	-2.0177	0.0019058	0.023522	0.043626	0.61574
Atrx	-0.22566	-2.4876	0.0019058	0.023522	0.012861	0.58216
Anapc7	-0.22481	-3.0848	0.0019638	0.024152	0.002037	0.23659
Uqcr11	-0.22407	-2.0581	0.0020509	0.02503	0.039576	0.61574
Dgkd	-0.22406	-2.7549	0.0020509	0.02503	0.0058717	0.41661
Iglon5	-0.2239	-2.3867	0.0020606	0.025059	0.017001	0.58216
Ambra1	-0.22388	-2.5434	0.0020606	0.025059	0.010976	0.55893
Rpap2	-0.22369	-0.87332	0.0020702	0.025147	0.38249	0.81657
Tada2b	-0.22256	-1.5178	0.002167	0.026184	0.12905	0.67959
Pcnxl4	-0.22216	-0.97916	0.0021863	0.026402	0.3275	0.79005
Ppt2	-0.22171	-2.6927	0.002225	0.026775	0.0070877	0.46666
Dzip3	-0.22165	-2.9972	0.0022347	0.02686	0.0027245	0.28561
Dbr1	-0.22156	-0.94538	0.0022347	0.02686	0.34447	0.79977
Olfr45	-0.22144	-2.2007	0.002254	0.02703	0.027759	0.61153
Ptov1	-0.22139	-2.3646	0.002254	0.02703	0.018048	0.58216
Rictor	-0.22138	-2.5062	0.002254	0.02703	0.012203	0.58094
Tagln2	-0.22048	-3.0619	0.0023314	0.027877	0.0021991	0.24563
Setx	-0.22043	-3.1802	0.0023411	0.027896	0.0014716	0.20148
Cnot10	-0.22038	-2.2659	0.0023411	0.027896	0.023456	0.6009
Nat6	-0.22029	-1.2606	0.0023411	0.027896	0.20746	0.73056
9130011E15Rik	-0.22024	-2.7523	0.0023411	0.027896	0.0059176	0.41754
Morf4l2	-0.22011	-1.6582	0.0023508	0.027979	0.097287	0.66405
Nr1h2	-0.21978	-2.8297	0.0023895	0.028326	0.0046594	0.36183
Hsd17b4	-0.21962	-1.7849	0.0023991	0.028392	0.074279	0.6435
Ncor1	-0.21832	-2.9366	0.0025152	0.029562	0.0033187	0.30945
A230065H16Rik	-0.21831	-2.675	0.0025152	0.029562	0.0074739	0.47838
Rnf145	-0.21811	-2.4807	0.0025249	0.029625	0.013111	0.58216
Coq2	-0.21799	-2.3399	0.0025249	0.029625	0.01929	0.59168
Ndufa10	-0.21765	-1.3536	0.0025733	0.030142	0.17588	0.71069
Naa38	-0.21755	-2.0721	0.002583	0.030238	0.038259	0.61574
Olfr168	-0.21651	-2.949	0.0027184	0.031573	0.0031883	0.30375
Alg8	-0.21606	-1.5712	0.0027958	0.032236	0.11613	0.67327
Prr19	-0.21576	-2.8539	0.0028248	0.032517	0.0043192	0.3485
Emc3	-0.21558	-2.5599	0.0028345	0.032574	0.010469	0.55056
Thra	-0.21554	-2.7636	0.0028345	0.032574	0.0057171	0.4085
Bcorl1	-0.21504	-3.395	0.0028732	0.032982	0.00068626	0.12147
Ost4	-0.21463	-1.6048	0.0029409	0.033666	0.10855	0.66955
Setd4	-0.21462	-3.064	0.0029409	0.033666	0.0021837	0.24536
Arntl	-0.21453	-2.9177	0.0029506	0.033739	0.003526	0.31833
Zfp395	-0.21378	-2.6313	0.0030473	0.034615	0.0085058	0.51949
Pnn	-0.21354	-1.3668	0.0030667	0.034778	0.17169	0.70679
Smg6	-0.21339	-2.4003	0.0030667	0.034778	0.016383	0.58216
Tspo	-0.21339	-2.0665	0.0030667	0.034778	0.03878	0.61574
Zfx	-0.21319	-2.4682	0.0030957	0.035088	0.013581	0.58216
Mad2l1	-0.21274	-0.53738	0.0031924	0.036046	0.59101	0.89303
Itfg2	-0.21263	-2.1192	0.0031924	0.036046	0.034075	0.61574
Cpsf2	-0.21234	-0.74037	0.0032214	0.036334	0.45908	0.84643
2310061I04Rik	-0.21228	-3.0883	0.0032311	0.036383	0.0020127	0.23648
Spop	-0.21222	-1.9409	0.0032311	0.036383	0.052274	0.62072
Bmpr1a	-0.21218	-2.2205	0.0032311	0.036383	0.026384	0.61153
Mrpl17	-0.21167	-1.1056	0.0033472	0.037486	0.26889	0.76207
Traf2	-0.2116	-2.1892	0.0033569	0.037574	0.02858	0.61153
Wnk3	-0.21072	-2.6227	0.0034536	0.038574	0.0087242	0.51977
Ier5	-0.21046	-2.4679	0.0034826	0.038877	0.013592	0.58216
Mrps25	-0.20966	-0.81684	0.0035697	0.039614	0.41402	0.82796
2700089E24Rik	-0.20956	-2.3434	0.0035697	0.039614	0.019111	0.59159
Fbxl6	-0.2095	-2.0452	0.0035697	0.039614	0.040838	0.61574
Psmc3	-0.20928	-1.2636	0.0035987	0.039829	0.20636	0.72973
Edem2	-0.2089	-2.6438	0.0036568	0.040342	0.0081976	0.51202
Stau2	-0.20882	-3.0915	0.0036761	0.04049	0.0019912	0.23648
Hif1a	-0.20859	-2.115	0.0036955	0.04066	0.034427	0.61574
Olfr644	-0.2085	-0.85748	0.0037051	0.040745	0.39118	0.81938
Atrip	-0.20845	-2.0497	0.0037148	0.040764	0.040395	0.61574
Pex1	-0.20747	-2.5109	0.0039083	0.042751	0.012044	0.58094
Tspyl1	-0.20736	-2.3067	0.003918	0.042812	0.021073	0.59771
B3gnt2	-0.20679	-1.7506	0.004005	0.043602	0.080017	0.65045
P2rx2	-0.20679	-2.248	0.004005	0.043602	0.024575	0.6027
Gm10229	-0.2064	-2.4952	0.0040727	0.044176	0.012587	0.58216
Map6d1	-0.20605	-2.9547	0.0040921	0.04434	0.00313	0.30228
Sema5a	-0.20599	-2.8906	0.0041114	0.044503	0.0038456	0.33127
Ube2n	-0.20548	-1.8722	0.0042082	0.045431	0.061186	0.63154
Taf12	-0.20547	-0.90276	0.0042082	0.045431	0.36666	0.81018
Serpinb3c	-0.2053	-1.8331	0.0042469	0.045753	0.066794	0.63665
Atp6ap1	-0.20523	-2.3794	0.0042759	0.046018	0.017339	0.58216
Dmrt1	-0.20511	-2.7255	0.0042953	0.046202	0.0064201	0.44137
Vezf1	-0.20482	-3.0704	0.0043339	0.046545	0.0021377	0.24247
Rnf185	-0.20473	-2.3553	0.0043436	0.046625	0.018508	0.58597
C130026I21Rik	-0.20421	-2.0004	0.0044404	0.047516	0.045456	0.61574
Cflar	-0.20345	-2.295	0.0045855	0.048891	0.021736	0.6009
Zfp644	-0.2033	-1.5615	0.0046242	0.049202	0.1184	0.67563
Olfr805	-0.20295	-2.2902	0.0047016	0.049897	0.022008	0.6009
Cxcr5	-0.20244	-2.4504	0.0048176	0.050946	0.014269	0.58216
Vps37a	-0.20237	-1.7759	0.0048176	0.050946	0.075749	0.64791
Pmepa1	-0.20229	-2.1501	0.004837	0.051099	0.031551	0.61574
Olfr194	-0.2016	-2.6119	0.0049434	0.05209	0.0090041	0.52258
Clock	-0.20159	-2.8142	0.0049434	0.05209	0.0048895	0.36892
Taf5l	-0.20124	-1.1131	0.0050111	0.052696	0.26567	0.75989
Phf10	-0.20108	-2.2081	0.0050595	0.053123	0.027235	0.61153
Obsl1	-0.20062	-1.8753	0.0051466	0.053928	0.060746	0.6309
Frs2	-0.20044	-0.9421	0.0051466	0.053928	0.34614	0.80108
Zfp335	-0.2	-0.69061	0.0052626	0.054673	0.48981	0.85752
Mtif3	-0.19976	-2.0584	0.005311	0.055038	0.039549	0.61574
Grn	-0.19968	-2.5533	0.00534	0.055283	0.010671	0.55591
Actr10	-0.19959	-0.90264	0.0053691	0.055556	0.36672	0.81018
Rab21	-0.19928	-2.1614	0.0054561	0.056287	0.030664	0.61574
Tmem185b	-0.19928	-2.4955	0.0054561	0.056287	0.01258	0.58216
Atg14	-0.19914	-2.0514	0.0054948	0.056602	0.040228	0.61574
Prmt7	-0.19845	-2.508	0.005669	0.058193	0.012142	0.58094
Slirp	-0.1984	-2.5265	0.005669	0.058193	0.01152	0.57225
Nedd8	-0.19827	-0.62111	0.0056883	0.058333	0.53453	0.87318
Nono	-0.19823	-1.8898	0.005698	0.058375	0.058784	0.62768
Pdcd7	-0.19819	-1.8192	0.005698	0.058375	0.068884	0.63838
Sfmbt1	-0.19816	-2.6535	0.0057077	0.058445	0.007965	0.50314
Wibg	-0.19797	-1.752	0.0057754	0.05908	0.07977	0.65045
Tmem186	-0.19728	-2.0323	0.0059205	0.060236	0.042119	0.61574
Edem3	-0.19711	-2.699	0.0059592	0.060541	0.006954	0.46228
Slc2a5	-0.19708	-2.2766	0.0059592	0.060541	0.022813	0.6009
Hoxb4	-0.19703	-2.135	0.0059592	0.060541	0.032762	0.61574
Paxbp1	-0.19699	-1.6967	0.0059688	0.060609	0.089757	0.6618
Eprs	-0.19658	-0.73883	0.0060656	0.06141	0.46001	0.84732
Runx1	-0.19654	-2.4696	0.0060656	0.06141	0.013525	0.58216
Edf1	-0.19647	-2.1686	0.0060753	0.061478	0.030114	0.61416
Ncln	-0.19629	-2.8784	0.006114	0.06184	0.0039968	0.33889
Fam193a	-0.19608	-1.9059	0.0061623	0.062298	0.056658	0.62484
Snx3	-0.19603	-1.0845	0.006172	0.062366	0.27815	0.76582
Nsmaf	-0.19602	-2.4435	0.0061817	0.062402	0.014544	0.58216
Trappc5	-0.196	-1.2117	0.0061817	0.062402	0.22563	0.74236
Lrrtm3	-0.19592	-2.2165	0.0061914	0.062469	0.026659	0.61153
Usp25	-0.19587	-2.2198	0.0062204	0.062732	0.026434	0.61153
Atp5j	-0.19571	-1.7499	0.0062494	0.062963	0.080131	0.65045
Ythdc1	-0.19558	-2.0406	0.0062591	0.062999	0.041292	0.61574
Tmem63c	-0.19546	-0.7885	0.0062881	0.06326	0.43041	0.83401
Tmco3	-0.19529	-1.6375	0.0062978	0.063327	0.10153	0.66487
Nle1	-0.19505	-0.82847	0.0063365	0.063685	0.4074	0.82508
Rnf19a	-0.19452	-2.6183	0.0064429	0.064535	0.0088361	0.51977
Pex2	-0.19421	-2.5928	0.0064912	0.064925	0.0095207	0.53054
Vmn1r31	-0.19416	-1.7052	0.0065203	0.065184	0.088149	0.6618
Cops4	-0.19386	-1.9784	0.006617	0.065991	0.047888	0.61574
Mdh2	-0.1938	-2.7053	0.006646	0.066121	0.0068246	0.45958
Idi1	-0.19312	-1.4505	0.0067524	0.067115	0.14691	0.6893
Slc5a7	-0.19274	-2.1895	0.0068589	0.067814	0.028559	0.61153
Fgb	-0.19233	-2.1937	0.0069653	0.068801	0.028257	0.61153
Nup85	-0.19223	-0.69138	0.0069943	0.069021	0.48933	0.85745
Ei24	-0.19215	-2.4902	0.0070136	0.069146	0.012766	0.58216
Ptpn11	-0.19203	-1.1828	0.0070427	0.069399	0.23688	0.74737
Gm10922	-0.19194	-1.3088	0.0070717	0.069652	0.1906	0.72241
Cluap1	-0.19183	-2.6173	0.0071104	0.069933	0.0088617	0.51977
Gm13298	-0.19182	-2.4548	0.0071201	0.069995	0.014095	0.58216
Dqx1	-0.19155	-1.9017	0.0071781	0.070499	0.057216	0.6252
Ankrd17	-0.19153	-2.6206	0.0072071	0.07075	0.0087786	0.51977
Chpf	-0.19143	-2.3399	0.0072265	0.070839	0.019287	0.59168
Lyrm4	-0.19131	-0.84325	0.0072555	0.071056	0.39909	0.82143
Pex6	-0.1912	-2.0013	0.0072652	0.071117	0.045362	0.61574
Fem1b	-0.19091	-2.1842	0.0073329	0.071645	0.028949	0.61153
Dennd2a	-0.19082	-2.1378	0.0073426	0.071705	0.03253	0.61574
Apoc1	-0.19069	-1.9932	0.0073716	0.071819	0.046235	0.61574
Sspn	-0.19067	-1.8748	0.0073716	0.071819	0.060819	0.6309
Foxh1	-0.19036	-2.0876	0.0074683	0.072693	0.036837	0.61574
Ncaph2	-0.18924	-2.2267	0.0077876	0.07541	0.025967	0.61153
Pth2r	-0.18904	-2.5933	0.0078263	0.07563	0.0095047	0.53054
Kmt2b	-0.18898	-1.9972	0.0078359	0.07563	0.045805	0.61574
Exosc3	-0.18897	-1.612	0.0078359	0.07563	0.10696	0.66809
Snrpc	-0.18895	-1.1439	0.0078359	0.07563	0.25265	0.75229
Hdac8	-0.18893	-2.4886	0.0078359	0.07563	0.012823	0.58216
Rab3gap2	-0.1888	-2.1253	0.007865	0.075804	0.033564	0.61574
Gapdh	-0.18878	-0.87438	0.007865	0.075804	0.38191	0.81619
Eef1a2	-0.18857	-1.0415	0.007923	0.076151	0.29764	0.77617
Cd2ap	-0.18849	-2.1584	0.0079423	0.076301	0.030896	0.61574
Cav3	-0.18802	-2.3151	0.0080778	0.077479	0.02061	0.59771
Ctdnep1	-0.18796	-2.0895	0.0080875	0.077479	0.036664	0.61574
Pdss1	-0.18728	-1.9806	0.00831	0.079134	0.047633	0.61574
Gtf2f2	-0.18719	-1.1098	0.008339	0.079337	0.26708	0.76116
Btbd3	-0.18703	-2.267	0.0084067	0.079725	0.02339	0.6009
Ptcd3	-0.18699	-1.5734	0.0084164	0.07978	0.11562	0.6729
Ube2z	-0.18684	-2.1367	0.0084744	0.080183	0.032624	0.61574
Chst7	-0.18658	-1.7622	0.0085712	0.08095	0.078028	0.64863
Trp53i13	-0.18651	-2.3362	0.0085808	0.080968	0.01948	0.59181
2310057N15Rik	-0.18648	-2.6233	0.0085808	0.080968	0.0087076	0.51977
Pyurf	-0.18612	-1.7215	0.0087356	0.082278	0.085156	0.66174
Nes	-0.18607	-2.4808	0.0087646	0.082486	0.01311	0.58216
Commd1	-0.18603	-2.3544	0.008784	0.082486	0.018551	0.58642
4930562C15Rik	-0.18595	-2.2547	0.0087937	0.082486	0.024151	0.60155
Olfr780	-0.18587	-2.505	0.0088227	0.082721	0.012244	0.58094
Ddx28	-0.1856	-1.839	0.0089291	0.083454	0.065918	0.63519
Taf11	-0.18514	-1.0378	0.0090065	0.084025	0.29935	0.77688
Mfn2	-0.18512	-2.712	0.0090065	0.084025	0.0066877	0.45476
Tmem206	-0.18505	-2.7302	0.0090355	0.08422	0.0063294	0.4396
Trpt1	-0.18454	-1.8411	0.009287	0.086331	0.065604	0.63519
Commd10	-0.18439	-2.2857	0.0093547	0.086804	0.022272	0.6009
Mvk	-0.18437	-1.9379	0.0093547	0.086804	0.052631	0.6212
Mrps24	-0.18412	-1.7001	0.0094321	0.087366	0.089118	0.6618
Pbx1	-0.18402	-2.7395	0.0095192	0.087975	0.0061524	0.43117
Rad54b	-0.18384	-1.3835	0.0095869	0.088364	0.1665	0.70445
Ppm1e	-0.18374	-2.5477	0.0096546	0.088869	0.010842	0.55759
Lcmt1	-0.18347	-2.0396	0.0097901	0.089916	0.041389	0.61574
Ddx39b	-0.18314	-1.6552	0.0098771	0.090394	0.097876	0.66405
Man1c1	-0.18312	-2.2651	0.0098868	0.090442	0.023506	0.6009
Crb3	-0.18267	-2.3961	0.010071	0.091758	0.01657	0.58216
Bnip1	-0.18221	-1.716	0.010196	0.0927	0.086157	0.6618
Sec61b	-0.18193	-2.2233	0.010312	0.09355	0.026193	0.61153
Rdh8	-0.18191	-2.7849	0.010312	0.09355	0.0053539	0.38974
L3mbtl3	-0.18147	-2.1799	0.010477	0.094668	0.029265	0.61153
F11r	-0.18111	-1.7008	0.010545	0.095197	0.088984	0.6618
Sltm	-0.18108	-1.9315	0.010564	0.095288	0.053424	0.6212
Pnpla3	-0.18097	-2.5404	0.010622	0.095728	0.011073	0.55971
Tnfrsf8	-0.18068	-2.599	0.010757	0.09657	0.0093506	0.53054
Nrp1	-0.18045	-2.5796	0.010786	0.096788	0.0098912	0.54098
Prorsd1	-0.18027	-1.9955	0.010854	0.097269	0.045986	0.61574
Edrf1	-0.1799	-2.7483	0.011048	0.098661	0.0059904	0.42124
Gm21637	-0.17972	-1.8271	0.011144	0.099182	0.067683	0.63838
Npr2	-0.17963	-2.1073	0.011164	0.099312	0.035087	0.61574
G0s2	-0.17915	-2.8148	0.011415	0.10129	0.00488	0.36892
Olfr193	-0.17908	-2.4401	0.011444	0.10141	0.014683	0.58216
Sde2	-0.17887	-1.5962	0.011599	0.10248	0.11043	0.67109
Chmp2b	-0.17805	-2.2682	0.011957	0.10506	0.023319	0.6009
Fxn	-0.17794	-1.5747	0.012005	0.10517	0.11532	0.6729
Casp8	-0.17785	-2.5609	0.012083	0.10571	0.01044	0.55056
Tuba4a	-0.17756	-2.5011	0.012199	0.10659	0.01238	0.58094
Rxrb	-0.17749	-2.3517	0.012247	0.10693	0.018688	0.58677
Prdm13	-0.17715	-2.0633	0.012402	0.10791	0.039089	0.61574
Pspc1	-0.17699	-2.456	0.01246	0.10824	0.014051	0.58216
Bcl6	-0.17647	-0.74885	0.01275	0.11019	0.45395	0.84269
Zeb2	-0.17639	-2.2203	0.012779	0.11031	0.026396	0.61153
Txndc11	-0.17629	-1.6212	0.012837	0.11058	0.10497	0.66487
Stk36	-0.17619	-2.1519	0.012915	0.11106	0.031403	0.61574
Gpc1	-0.17573	-2.1382	0.013108	0.11249	0.032497	0.61574
Col14a1	-0.17569	-0.93966	0.013147	0.11264	0.34739	0.80263
Cox15	-0.17563	-1.452	0.013195	0.11296	0.14649	0.6893
Ccdc61	-0.17554	-1.4539	0.013234	0.1132	0.14598	0.68858
1110038F14Rik	-0.17536	-1.7789	0.013302	0.11373	0.075256	0.64558
Nubpl	-0.17508	-1.8415	0.013437	0.11449	0.065542	0.63519
Nlgn2	-0.17503	-1.9514	0.013457	0.11449	0.051014	0.6164
Pex12	-0.17477	-2.6288	0.013602	0.11544	0.0085693	0.51953
Them5	-0.17461	-0.83877	0.013679	0.11604	0.4016	0.82337
Galnt2	-0.17423	-2.3907	0.013902	0.1175	0.016818	0.58216
Tbc1d7	-0.17421	-2.711	0.013911	0.11753	0.0067089	0.45476
Ptpn12	-0.17395	-1.8738	0.014076	0.11858	0.060958	0.6309
Fbxl17	-0.17375	-1.9593	0.01425	0.11966	0.050076	0.61586
Mrpl15	-0.17368	-1.0339	0.014298	0.1199	0.3012	0.77779
Mesdc1	-0.17363	-1.3575	0.014308	0.1199	0.17463	0.70962
4930558K02Rik	-0.17345	-1.8433	0.014424	0.12027	0.065289	0.63519
Tsacc	-0.1734	-2.2994	0.014472	0.12045	0.021484	0.6009
Eif2b1	-0.17318	-0.61971	0.01454	0.12056	0.53545	0.87356
Nabp2	-0.17318	-2.0919	0.01454	0.12056	0.036448	0.61574
Olfr205	-0.17306	-2.8402	0.014598	0.12091	0.0045086	0.35617
Cdk1	-0.17296	-0.59743	0.014695	0.12162	0.55022	0.8805
Polq	-0.1728	-1.4261	0.014801	0.12245	0.15385	0.69411
Commd2	-0.1727	-2.0337	0.01483	0.12257	0.041981	0.61574
Dnlz	-0.17269	-1.7542	0.01484	0.12257	0.079391	0.65045
Mbd3	-0.17259	-1.6273	0.014859	0.12263	0.10368	0.66487
Krt8	-0.17227	-2.6846	0.015024	0.12384	0.0072626	0.47216
Rnmtl1	-0.17209	-1.8097	0.01513	0.12456	0.070342	0.63838
Ifnl3	-0.17207	-2.4625	0.01514	0.12456	0.013797	0.58216
Cnot4	-0.17202	-3.0311	0.015159	0.12456	0.0024363	0.26098
2510009E07Rik	-0.17201	-2.8467	0.015159	0.12456	0.0044171	0.35123
Tmem147	-0.17163	-2.3276	0.015401	0.1263	0.019935	0.59771
Ccr3	-0.17162	-2.13	0.015401	0.1263	0.033175	0.61574
Cpa1	-0.17155	-1.9953	0.015449	0.1266	0.046013	0.61574
Tnfrsf21	-0.1712	-1.8942	0.015643	0.12773	0.058195	0.62757
Dmxl2	-0.17092	-0.82312	0.015778	0.12858	0.41044	0.8268
Zdhhc8	-0.17091	-2.5933	0.015788	0.12861	0.0095061	0.53054
Gls	-0.17085	-2.175	0.015846	0.12898	0.029633	0.61203
Ptar1	-0.17082	-2.3097	0.015865	0.12908	0.020903	0.59771
P2rx6	-0.17074	-2.0609	0.015923	0.12949	0.039314	0.61574
Tlk2	-0.17049	-3.1013	0.016088	0.13007	0.0019267	0.23441
Olfr740	-0.17032	-2.9934	0.016194	0.13081	0.0027586	0.28578
Psap	-0.1703	-2.7252	0.016204	0.13081	0.006426	0.44137
Flt1	-0.17029	-2.0185	0.016214	0.13084	0.043539	0.61574
Vps25	-0.17017	-0.54512	0.016272	0.13115	0.58567	0.89253
Cuzd1	-0.17003	-2.03	0.016349	0.13142	0.042352	0.61574
Arl6ip6	-0.16972	-1.2395	0.016543	0.13256	0.21516	0.73554
Grsf1	-0.16967	-1.6853	0.016572	0.13271	0.091936	0.66231
Sec14l5	-0.16965	-2.0053	0.016581	0.13271	0.044928	0.61574
Senp8	-0.16948	-1.2121	0.016697	0.13338	0.22548	0.74236
Irs2	-0.16947	-1.6338	0.016697	0.13338	0.10229	0.66487
Stt3b	-0.16888	-2.2004	0.017007	0.13533	0.027776	0.61153
Nfs1	-0.16884	-0.47744	0.017026	0.13544	0.63305	0.9058
Dnajc3	-0.16873	-1.9241	0.017104	0.1359	0.054347	0.62133
Msi2	-0.16862	-2.1107	0.017104	0.1359	0.034796	0.61574
Gm5938	-0.1684	-2.0775	0.01722	0.1365	0.037752	0.61574
Cdip1	-0.1683	-2.6687	0.017229	0.13653	0.0076134	0.4858
H13	-0.16829	-2.408	0.017239	0.13655	0.016041	0.58216
Acsl5	-0.16816	-2.1871	0.017316	0.13701	0.028733	0.61153
Kmt2c	-0.16809	-2.5592	0.017384	0.13749	0.010492	0.55056
Lin9	-0.16797	-1.2147	0.017452	0.13792	0.22447	0.74155
Dcaf12	-0.16786	-2.9763	0.017539	0.13834	0.0029175	0.29091
Rfx3	-0.16778	-2.3592	0.017578	0.13844	0.018315	0.58431
Rbm27	-0.1677	-1.6873	0.017616	0.13869	0.091548	0.66231
Bok	-0.16755	-2.2186	0.017723	0.13942	0.026516	0.61153
Idh1	-0.16734	-1.9349	0.017887	0.14024	0.053001	0.6212
Cycs	-0.1672	-0.71814	0.017965	0.14079	0.47267	0.85196
Scnn1b	-0.167	-1.606	0.01809	0.14167	0.10828	0.66955
Arpp21	-0.16693	-1.7398	0.018139	0.14183	0.081897	0.6545
Ugp2	-0.16673	-2.0028	0.018294	0.14282	0.045198	0.61574
Slc22a3	-0.16671	-2.5605	0.018313	0.14292	0.010452	0.55056
Rpl30	-0.16667	-0.47869	0.018332	0.14299	0.63216	0.9056
E2f7	-0.16658	-2.2224	0.01839	0.14326	0.026259	0.61153
Adcy4	-0.1663	-2.1947	0.018506	0.14389	0.028186	0.61153
Olfr610	-0.16629	-1.0331	0.018506	0.14389	0.30154	0.7779
Olfr1097	-0.16604	-1.808	0.018661	0.14487	0.070606	0.63838
Nek6	-0.16603	-2.47	0.018671	0.14489	0.013513	0.58216
1110025L11Rik	-0.1657	-2.1287	0.018884	0.14594	0.03328	0.61574
Tipin	-0.16567	-0.70282	0.018884	0.14594	0.48217	0.85521
Tbc1d22a	-0.16563	-2.0371	0.018903	0.14604	0.041642	0.61574
Hmox2	-0.16546	-2.8088	0.018971	0.1464	0.0049732	0.37252
Dgkg	-0.16528	-2.618	0.019038	0.14681	0.0088438	0.51977
Hdac7	-0.16519	-2.0854	0.019106	0.14713	0.037036	0.61574
Chst2	-0.16515	-2.9519	0.019116	0.14713	0.0031582	0.30228
Jph1	-0.16515	-2.5423	0.019116	0.14713	0.011013	0.55903
Hoxc8	-0.16469	-3.0932	0.019425	0.1494	0.0019798	0.23648
Brms1	-0.16462	-1.5982	0.019483	0.1498	0.11	0.67109
Esr1	-0.16446	-1.7839	0.019609	0.15048	0.07444	0.64399
Srp68	-0.16413	-1.2015	0.01989	0.15235	0.22954	0.7446
Hyou1	-0.16401	-1.2391	0.019957	0.15268	0.21529	0.73577
Smim22	-0.16401	-2.3706	0.019977	0.15268	0.017761	0.58216
Rcc2	-0.16398	-2.0338	0.020025	0.15299	0.041973	0.61574
Tmem189	-0.16397	-2.4391	0.020035	0.15301	0.014724	0.58216
Vcl	-0.16385	-2.1437	0.020122	0.15356	0.03206	0.61574
Ets1	-0.16379	-2.308	0.02019	0.15385	0.020997	0.59771
Cdk5rap1	-0.16367	-2.4063	0.020306	0.15451	0.016114	0.58216
Tsg101	-0.16358	-0.78443	0.020383	0.15493	0.43279	0.83427
Chd1	-0.16348	-1.34	0.02046	0.15534	0.18023	0.71488
Gdpgp1	-0.16348	-2.6195	0.02046	0.15534	0.008806	0.51977
Zc3h12d	-0.16345	-2.3109	0.02047	0.15536	0.020836	0.59771
Comp	-0.16333	-1.9606	0.020567	0.15587	0.049931	0.61576
Phip	-0.1633	-1.9536	0.020586	0.15595	0.050749	0.6164
Cep162	-0.16316	-2.6761	0.020693	0.15642	0.0074493	0.47838
9030617O03Rik	-0.16299	-1.2427	0.020915	0.15758	0.214	0.73528
Dcun1d4	-0.16285	-2.1453	0.021031	0.15817	0.031926	0.61574
Sept12	-0.16284	-1.6965	0.021041	0.15818	0.089793	0.6618
Pax3	-0.1626	-2.2201	0.021205	0.15913	0.026414	0.61153
Clps	-0.16255	-2.4992	0.021244	0.15925	0.012448	0.58094
Cplx3	-0.16253	-2.2125	0.021263	0.15933	0.026935	0.61153
2510002D24Rik	-0.16232	-2.9463	0.021418	0.1602	0.0032156	0.30495
Fbxl14	-0.16231	-2.4273	0.021428	0.16022	0.01521	0.58216
Paqr4	-0.16222	-2.2748	0.021486	0.16053	0.022921	0.6009
Aco2	-0.16219	-2.4886	0.021525	0.16077	0.012826	0.58216
Cyp4f15	-0.16206	-2.4312	0.02167	0.16162	0.015049	0.58216
Parl	-0.16171	-2.7128	0.021999	0.16324	0.006671	0.45476
Zfp362	-0.16154	-1.9681	0.022173	0.1643	0.049061	0.61574
Mical3	-0.16149	-1.8645	0.022221	0.16454	0.062255	0.63231
Krtap31-1	-0.16144	-2.3902	0.02225	0.16464	0.016839	0.58216
Atp6v1c2	-0.16082	-0.82196	0.022715	0.16742	0.4111	0.82749
Prune	-0.16077	-2.087	0.022744	0.16757	0.03689	0.61574
Smad1	-0.1606	-2.1576	0.02284	0.16816	0.03096	0.61574
Adcy9	-0.16058	-1.8161	0.02286	0.16824	0.069351	0.63838
Ice1	-0.16012	-1.4062	0.023314	0.17074	0.15968	0.69758
Casr	-0.1601	-2.1618	0.023343	0.17089	0.030634	0.61574
Epb4.1l2	-0.15994	-0.81587	0.023537	0.17182	0.41457	0.82834
Sec62	-0.15993	-1.9866	0.023537	0.17182	0.046961	0.61574
Sap18	-0.15977	-1.5148	0.023643	0.17223	0.12983	0.67959
Slc35e4	-0.15977	-2.6328	0.023643	0.17223	0.0084681	0.51949
Btbd9	-0.15973	-1.6537	0.023653	0.17224	0.098192	0.66405
2610507B11Rik	-0.15959	-1.7679	0.023692	0.17234	0.07707	0.64791
4922502D21Rik	-0.15944	-2.0741	0.023933	0.17361	0.038067	0.61574
Fev	-0.15939	-2.0937	0.023962	0.1737	0.036286	0.61574
Entpd7	-0.15934	-1.5752	0.024021	0.174	0.11521	0.6729
Gosr1	-0.15929	-2.1829	0.02405	0.17409	0.02904	0.61153
Fthl17	-0.15925	-0.72843	0.024079	0.17418	0.46635	0.85027
Krtap19-3	-0.15925	-2.2797	0.024079	0.17418	0.022623	0.6009
Rhox3f	-0.15896	-2.0992	0.024233	0.17524	0.035797	0.61574
Uqcrc2	-0.1589	-1.2476	0.02434	0.17588	0.21219	0.73499
Gm10094	-0.15887	-1.5436	0.024378	0.17604	0.12269	0.67661
Socs1	-0.1588	-2.1651	0.024456	0.17641	0.030379	0.61513
Ppig	-0.15879	-1.9839	0.024456	0.17641	0.047267	0.61574
Comt	-0.15871	-2.6115	0.024514	0.17665	0.0090133	0.52258
Nomo1	-0.15838	-2.2745	0.024911	0.17894	0.022936	0.6009
Twist2	-0.15836	-2.4728	0.02493	0.17898	0.013405	0.58216
Hspa4	-0.15831	-2.0423	0.024998	0.1792	0.041122	0.61574
Hpse	-0.15825	-2.4793	0.025036	0.17941	0.013164	0.58216
Ccdc74a	-0.15815	-2.4294	0.025123	0.17985	0.015124	0.58216
Pik3c2b	-0.15805	-1.8693	0.02522	0.18028	0.06158	0.6317
Ccdc9	-0.15803	-2.2172	0.025239	0.18028	0.026612	0.61153
Dnajb13	-0.15803	-2.4341	0.025239	0.18028	0.014927	0.58216
Phlpp1	-0.158	-2.0442	0.025259	0.18028	0.04093	0.61574
B3galt5	-0.15796	-2.3678	0.025288	0.18028	0.017896	0.58216
Neurog1	-0.15794	-2.5707	0.025288	0.18028	0.010149	0.54723
Hmg20b	-0.15789	-1.917	0.025326	0.18038	0.055244	0.62226
Fndc3b	-0.15785	-2.0868	0.025346	0.18038	0.036908	0.61574
Smyd3	-0.15783	-2.5021	0.025346	0.18038	0.012346	0.58094
Exoc6b	-0.15777	-1.8743	0.025375	0.18046	0.060888	0.6309
Cnih2	-0.15764	-2.0599	0.025462	0.18071	0.039408	0.61574
Fabp3	-0.15759	-1.9081	0.025501	0.18092	0.056383	0.62423
Cnksr3	-0.15756	-2.4286	0.02552	0.18099	0.015158	0.58216
BC016579	-0.15754	-2.9348	0.025539	0.18107	0.0033379	0.30945
Nit2	-0.1575	-2.1763	0.025607	0.18143	0.02953	0.61164
Orai1	-0.15742	-1.9672	0.025694	0.18192	0.049157	0.61574
Emilin2	-0.15738	-2.6102	0.025733	0.18207	0.0090492	0.52258
Cfc1	-0.15732	-2.1817	0.025781	0.18223	0.029135	0.61153
Fam103a1	-0.15726	-1.6526	0.025859	0.18258	0.098418	0.66445
Casq2	-0.15721	-2.3414	0.025936	0.183	0.019214	0.59168
Adrbk1	-0.15705	-2.1974	0.02611	0.18361	0.027988	0.61153
Tfpi2	-0.15704	-1.1773	0.02612	0.18361	0.23908	0.74847
Fzd1	-0.15695	-2.4695	0.026217	0.18398	0.013532	0.58216
Gm14346	-0.15687	-1.1556	0.026333	0.18467	0.24786	0.7507
Micu2	-0.15672	-1.9162	0.026478	0.18537	0.055342	0.62226
Foxj2	-0.15642	-2.343	0.026739	0.18669	0.01913	0.59159
Nudt19	-0.15637	-2.0835	0.026778	0.18684	0.037204	0.61574
Mast3	-0.15624	-1.9266	0.026894	0.18746	0.054025	0.6212
Ica1	-0.15623	-2.146	0.026894	0.18746	0.03187	0.61574
Dalrd3	-0.15617	-2.8372	0.026961	0.18774	0.0045511	0.35747
Dyrk1b	-0.15608	-2.3617	0.027058	0.18829	0.018194	0.58382
B630005N14Rik	-0.1559	-2.0869	0.027252	0.18912	0.036896	0.61574
Kat2a	-0.15575	-2.1712	0.027387	0.18968	0.029913	0.61351
C2cd5	-0.15568	-2.3303	0.027435	0.18976	0.01979	0.59684
Tmem229a	-0.15533	-2.2481	0.027764	0.19152	0.024568	0.6027
Olfr1444	-0.15532	-1.9149	0.027784	0.19153	0.055502	0.62226
Kptn	-0.15531	-2.3066	0.027793	0.19153	0.021076	0.59771
Nr2c2	-0.15526	-2.3359	0.027851	0.19187	0.019494	0.59181
Ctsl	-0.1552	-2.5978	0.0279	0.19202	0.0093816	0.53054
Fastk	-0.15518	-2.1465	0.027948	0.19202	0.03183	0.61574
Ccdc142	-0.15512	-1.6434	0.028026	0.19249	0.1003	0.66445
2410131K14Rik	-0.15502	-1.1851	0.028093	0.19289	0.23598	0.74737
D11Wsu47e	-0.15495	-1.7691	0.028209	0.19343	0.07688	0.64791
Kalrn	-0.15489	-1.6609	0.028238	0.19351	0.096729	0.66405
2310067B10Rik	-0.15487	-2.446	0.028248	0.19351	0.014447	0.58216
Emc4	-0.15479	-1.7812	0.028354	0.19411	0.07488	0.64449
Ap3d1	-0.15477	-2.5124	0.028383	0.19424	0.011992	0.58094
Spcs2	-0.15451	-1.4244	0.028712	0.19604	0.15433	0.69411
Derl1	-0.1544	-2.3132	0.028867	0.1969	0.02071	0.59771
Tmc6	-0.15426	-2.1281	0.029022	0.19782	0.033331	0.61574
Serbp1	-0.15415	-1.7675	0.029128	0.19848	0.077149	0.64791
Ano4	-0.15392	-2.1798	0.029409	0.19993	0.02927	0.61153
Zfyve1	-0.15391	-1.3468	0.029419	0.19993	0.17804	0.71291
Cpped1	-0.15382	-2.5444	0.029486	0.20013	0.010948	0.55893
Ddi1	-0.15374	-1.0507	0.029612	0.20046	0.29339	0.77333
Hes1	-0.1536	-2.6159	0.029689	0.20059	0.0089	0.51977
Mrpl36	-0.15359	-1.4836	0.029699	0.20059	0.13791	0.68155
Mapk1ip1	-0.15355	-2.4644	0.029748	0.20085	0.013724	0.58216
Srek1	-0.15323	-2.4425	0.030154	0.20267	0.014585	0.58216
Uso1	-0.15315	-1.2046	0.030222	0.20292	0.22838	0.7446
Nans	-0.1529	-1.8837	0.030531	0.2046	0.059604	0.6303
Arpc4	-0.15288	-0.81794	0.030541	0.2046	0.41339	0.82796
Olfr94	-0.15283	-2.2583	0.030579	0.2046	0.02393	0.60116
Jmjd6	-0.15276	-2.4417	0.030638	0.20485	0.01462	0.58216
Epg5	-0.15271	-2.0522	0.030667	0.20491	0.040153	0.61574
Ikzf3	-0.15264	-1.3711	0.030734	0.20523	0.17034	0.70679
Sbds	-0.15255	-0.84579	0.030928	0.20606	0.39767	0.82076
Cyld	-0.15252	-1.8745	0.030966	0.20625	0.060858	0.6309
Rsph1	-0.15244	-1.9578	0.031063	0.20676	0.050257	0.61594
Nos2	-0.15239	-2.5236	0.03115	0.20714	0.011614	0.57225
Snai1	-0.15237	-1.8597	0.03116	0.20714	0.062926	0.63268
Celf1	-0.15233	-1.6597	0.031179	0.20719	0.09697	0.66405
Ccr1l1	-0.1523	-2.7714	0.031199	0.20719	0.0055809	0.40202
Trmt2a	-0.15229	-2.82	0.031208	0.20719	0.0048025	0.36892
Dmxl1	-0.15201	-1.5371	0.031547	0.20917	0.12427	0.67661
Pdss2	-0.15196	-2.0559	0.031634	0.20968	0.039793	0.61574
Nadk2	-0.1519	-2.5752	0.031731	0.21025	0.01002	0.54369
Htra2	-0.15188	-2.0322	0.03175	0.21025	0.042135	0.61574
Atf6	-0.15178	-2.0257	0.031847	0.21076	0.042796	0.61574
Tcf15	-0.15167	-2.0319	0.032089	0.21154	0.042161	0.61574
Olfr770	-0.15166	-2.52	0.032118	0.2116	0.011734	0.57324
Fzd7	-0.15146	-1.5321	0.03234	0.21273	0.1255	0.67661
Gm14744	-0.15144	-1.9094	0.03234	0.21273	0.05621	0.62377
Cpox	-0.15143	-2	0.032379	0.21291	0.045497	0.61574
Gm14347	-0.15141	-0.8458	0.032408	0.21303	0.39766	0.82076
Zkscan14	-0.15126	-0.77613	0.032543	0.21358	0.43767	0.83762
Dhx30	-0.15125	-1.8782	0.032553	0.21358	0.060352	0.6309
Cryga	-0.15091	-2.3722	0.033027	0.21567	0.017683	0.58216
Prokr1	-0.15082	-1.7631	0.033153	0.21642	0.077887	0.64798
Ing1	-0.15066	-2.0577	0.033366	0.21712	0.039624	0.61574
Cnot8	-0.15057	-2.5669	0.033501	0.21759	0.010262	0.54821
Gpr89	-0.15057	-2.2812	0.033501	0.21759	0.022538	0.6009
Zbtb12	-0.15046	-2.4704	0.033685	0.21858	0.013495	0.58216
Eif4h	-0.15028	-1.9049	0.033994	0.22024	0.056798	0.62484
Ppp2r1a	-0.15023	-1.4633	0.03412	0.22078	0.14339	0.68589
Tarbp2	-0.15023	-2.1027	0.03412	0.22078	0.035489	0.61574
Thap7	-0.1502	-1.5369	0.034159	0.22089	0.12432	0.67661
Mxra8	-0.15012	-2.2612	0.034304	0.22142	0.023744	0.60116
Olfr110	-0.15008	-0.89198	0.034333	0.22153	0.3724	0.81295
Hcfc1	-0.15004	-0.61235	0.034381	0.22162	0.54031	0.87669
Agrp	-0.15003	-2.1809	0.03441	0.22162	0.029193	0.61153
Sharpin	-0.14998	-1.7741	0.034488	0.22191	0.076048	0.64791
Ppp2r5c	-0.1499	-2.3261	0.034594	0.22239	0.020015	0.59771
Ddit3	-0.14978	-2.4888	0.034817	0.22331	0.012817	0.58216
Cand1	-0.14974	-1.8037	0.034846	0.22331	0.07128	0.63838
Sec24c	-0.14971	-1.9001	0.034875	0.22342	0.057418	0.6253
Eif4g3	-0.14961	-1.673	0.03502	0.22379	0.094318	0.66324
C77080	-0.14953	-2.3427	0.035165	0.22452	0.019143	0.59159
Kctd3	-0.14951	-1.9291	0.035223	0.22475	0.053716	0.6212
Camk4	-0.14938	-2.2586	0.035397	0.22572	0.023908	0.60116
Cask	-0.14913	-1.8285	0.035697	0.22679	0.067479	0.6376
Abcc4	-0.14912	-2.0628	0.035716	0.22679	0.039133	0.61574
Gbp4	-0.14904	-2.3858	0.035765	0.22679	0.017041	0.58216
Zfp94	-0.14893	-1.8896	0.035929	0.2275	0.058813	0.62768
1700037C18Rik	-0.14889	-2.0243	0.035997	0.22778	0.042938	0.61574
Rnf149	-0.14887	-2.3164	0.036007	0.22778	0.020535	0.59771
Mrpl9	-0.14874	-1.0277	0.036152	0.22794	0.30407	0.77969
Ccdc71l	-0.14862	-2.5686	0.036248	0.22823	0.010211	0.54723
Muc13	-0.14862	-2.2969	0.036248	0.22823	0.021622	0.6009
Slc18a2	-0.14862	-1.2172	0.036258	0.22823	0.22353	0.74044
Trip11	-0.1486	-1.8411	0.036287	0.22823	0.065613	0.63519
Tex24	-0.14845	-1.3145	0.03651	0.22941	0.18866	0.72092
Klhl15	-0.14842	-1.6989	0.036519	0.22941	0.089337	0.6618
2510003E04Rik	-0.14834	-1.7269	0.036635	0.23	0.08419	0.65855
Fam57a	-0.14817	-1.5272	0.036887	0.23123	0.1267	0.67811
Trim14	-0.14808	-1.0046	0.037003	0.23173	0.31508	0.78424
Gm4477	-0.14788	-2.1135	0.037235	0.2325	0.034556	0.61574
Zfp36	-0.14782	-2.3978	0.037351	0.23294	0.016492	0.58216
Cacybp	-0.14777	-1.8002	0.03739	0.23304	0.071836	0.63978
Fam71f2	-0.14774	-0.98582	0.037438	0.23312	0.32422	0.78868
Afg3l1	-0.14772	-2.1628	0.037448	0.23312	0.030554	0.61574
Pcm1	-0.14772	-2.1167	0.037448	0.23312	0.034283	0.61574
Pou4f2	-0.1477	-1.9976	0.037487	0.23314	0.045765	0.61574
Hcfc2	-0.14769	-2.1217	0.037496	0.23314	0.033864	0.61574
Adig	-0.14763	-1.6178	0.037583	0.23345	0.10571	0.66545
Bdh1	-0.14759	-2.4317	0.037593	0.23345	0.015029	0.58216
Ccdc80	-0.14754	-1.9658	0.0377	0.23384	0.049318	0.61574
Tulp4	-0.14745	-2.1602	0.037825	0.23406	0.030757	0.61574
Ifi204	-0.14738	-1.9392	0.037922	0.23409	0.052482	0.62072
Med7	-0.14721	-1.8038	0.038145	0.23449	0.071256	0.63838
Il19	-0.14717	-2.9217	0.038212	0.23484	0.0034812	0.31566
Dgkb	-0.14715	-0.8124	0.038241	0.23488	0.41656	0.82883
Cacna2d3	-0.14713	-1.7827	0.03827	0.23499	0.074629	0.64448
Gcsh	-0.14702	-1.7892	0.038377	0.23548	0.073578	0.64237
Sec23ip	-0.14701	-1.5874	0.038396	0.23548	0.11242	0.67168
Gm1979	-0.1468	-0.49424	0.038735	0.23749	0.62114	0.90102
Arhgef6	-0.14679	-1.9394	0.038754	0.23753	0.052449	0.62072
Rpe65	-0.14675	-2.362	0.038783	0.23764	0.018178	0.58382
Ffar3	-0.14671	-1.8582	0.03886	0.23797	0.063145	0.63279
Pi4k2b	-0.14668	-2.446	0.038918	0.23826	0.014444	0.58216
1700001F09Rik	-0.14659	-2.3318	0.039073	0.23906	0.019711	0.59664
Tollip	-0.14642	-1.8104	0.039276	0.23995	0.070233	0.63838
Psmc3ip	-0.14628	-1.5666	0.039451	0.2404	0.1172	0.67556
Zbtb9	-0.14628	-1.7763	0.03946	0.2404	0.075681	0.64791
Satb2	-0.14617	-2.489	0.039634	0.24107	0.012809	0.58216
Chaf1a	-0.14612	-1.6279	0.039721	0.24125	0.10355	0.66487
Gpx4	-0.14606	-1.4487	0.039818	0.24148	0.14742	0.6893
Elavl4	-0.146	-2.189	0.039876	0.24162	0.028595	0.61153
Nfix	-0.14592	-1.326	0.039934	0.24169	0.18484	0.71857
Iah1	-0.14571	-2.0518	0.040128	0.24243	0.040186	0.61574
Vps41	-0.14563	-2.452	0.040273	0.24302	0.014208	0.58216
Cdh17	-0.14552	-1.6876	0.040437	0.2438	0.091487	0.66231
Cnpy2	-0.14549	-1.9044	0.040515	0.24406	0.056863	0.62484
Pex13	-0.14532	-1.895	0.040727	0.24477	0.058089	0.62757
Slc44a4	-0.14524	-0.66551	0.040853	0.24538	0.50573	0.86279
Avpi1	-0.14521	-2.0206	0.040892	0.24554	0.043326	0.61574
Tgif2	-0.1446	-2.0458	0.041714	0.24932	0.040774	0.61574
Cope	-0.14457	-1.8624	0.041821	0.2496	0.062547	0.63231
Ccin	-0.14453	-1.5208	0.041879	0.24973	0.1283	0.67918
Acbd3	-0.14442	-1.7355	0.042053	0.25026	0.082644	0.6545
Lcn3	-0.14433	-0.85197	0.042159	0.25068	0.39423	0.82005
Pdia3	-0.14433	-1.8805	0.042159	0.25068	0.060044	0.6305
Rnf220	-0.1443	-1.861	0.042217	0.2508	0.062749	0.63268
Zscan2	-0.1443	-2.2205	0.042217	0.2508	0.026387	0.61153
Sh3bgr	-0.14422	-1.6567	0.042304	0.25115	0.097574	0.66405
Pfkm	-0.14418	-1.9354	0.042362	0.25123	0.052935	0.6212
Adam26b	-0.14415	-2.655	0.042391	0.2513	0.0079302	0.50291
Mtfmt	-0.14415	-1.4721	0.042401	0.2513	0.141	0.68356
Grap2	-0.14412	-2.2045	0.042478	0.25162	0.027486	0.61153
Lamp1	-0.14408	-2.5449	0.042537	0.25176	0.010932	0.55893
Lypd5	-0.14387	-2.019	0.042846	0.25301	0.043484	0.61574
1810065E05Rik	-0.14366	-1.2421	0.043223	0.2545	0.21421	0.73534
Itga3	-0.14366	-1.8812	0.043214	0.2545	0.05995	0.6305
Unc50	-0.14361	-1.7598	0.043291	0.25477	0.078435	0.64993
Mtf1	-0.14355	-2.5819	0.043388	0.25526	0.0098246	0.5392
Llgl1	-0.14348	-1.7859	0.043504	0.25573	0.074109	0.64348
Vil1	-0.14341	-2.2033	0.043649	0.25629	0.027571	0.61153
Morc2a	-0.14334	-1.8791	0.043688	0.25634	0.060233	0.6309
Pdp1	-0.14325	-2.0323	0.043881	0.25714	0.042119	0.61574
Ssxb3	-0.14317	-1.1264	0.044007	0.25751	0.25998	0.75638
Chmp4b	-0.14311	-1.4718	0.044104	0.25772	0.14107	0.68356
Khdc1b	-0.14295	-2.2655	0.044442	0.25904	0.023481	0.6009
Pias1	-0.14287	-1.4371	0.044529	0.25947	0.15068	0.69192
Ube3b	-0.14279	-2.2754	0.044578	0.25965	0.022883	0.6009
Tmem132a	-0.14275	-2.1335	0.044655	0.25984	0.032886	0.61574
Sept2	-0.14271	-1.8239	0.044771	0.26035	0.068166	0.63838
Hao2	-0.1427	-1.7588	0.044781	0.26035	0.078608	0.65015
Sdf2l1	-0.14267	-2.066	0.04481	0.26044	0.038831	0.61574
Akr1a1	-0.14262	-1.4255	0.044868	0.26047	0.15402	0.69411
Ccr9	-0.14262	-0.92855	0.044868	0.26047	0.35312	0.80471
B4galt3	-0.1426	-2.2843	0.044878	0.26047	0.022353	0.6009
Chrnd	-0.1425	-2.0862	0.045061	0.26125	0.036958	0.61574
Vmac	-0.14237	-1.8556	0.045236	0.26189	0.063513	0.63319
Cs	-0.14228	-2.9228	0.045429	0.26257	0.0034695	0.31566
She	-0.14228	-2.6528	0.045429	0.26257	0.0079825	0.50314
Dpm3	-0.14213	-1.6324	0.045719	0.26333	0.1026	0.66487
Pxylp1	-0.14206	-1.5083	0.045777	0.26333	0.13147	0.67959
1110017D15Rik	-0.14202	-2.0525	0.045835	0.26359	0.040125	0.61574
Arpc2	-0.14199	-0.89283	0.045864	0.26368	0.37195	0.81295
Pkd1	-0.14195	-2.0544	0.045903	0.26368	0.039936	0.61574
Acaa1a	-0.14183	-2.2832	0.046077	0.26432	0.02242	0.6009
Plac1	-0.14182	-2.5225	0.046077	0.26432	0.011653	0.57225
Adam25	-0.14181	-1.3751	0.046077	0.26432	0.16909	0.70679
Dock6	-0.14164	-1.7514	0.04628	0.26504	0.079878	0.65045
Faim3	-0.14158	-1.7137	0.046367	0.26547	0.086577	0.6618
Wdr70	-0.14153	-0.70045	0.046484	0.26591	0.48365	0.85554
Ppm1a	-0.14146	-2.078	0.046638	0.26657	0.037713	0.61574
Cdc6	-0.14141	-0.69525	0.046725	0.26692	0.4869	0.85706
Gm572	-0.14131	-1.3938	0.04689	0.26764	0.16337	0.70189
Galnt9	-0.14128	-2.152	0.046929	0.26772	0.0314	0.61574
Inmt	-0.14122	-1.8435	0.047025	0.26805	0.065254	0.63519
Foxj3	-0.14113	-1.3762	0.047199	0.26835	0.16877	0.70679
Slc6a1	-0.14113	-1.8518	0.047199	0.26835	0.064061	0.63355
Abcb1b	-0.14112	-2.1914	0.047219	0.26835	0.028421	0.61153
Cog2	-0.14112	-1.0915	0.047209	0.26835	0.27506	0.76516
Cyp1a2	-0.14108	-1.8528	0.047238	0.26835	0.063914	0.63355
1700021K19Rik	-0.14106	-2.9812	0.047277	0.26837	0.0028707	0.29091
Olfr1323	-0.14106	-2.4929	0.047277	0.26837	0.012671	0.58216
Mcf2l	-0.14098	-2.625	0.047441	0.26884	0.0086642	0.51977
Moxd1	-0.14089	-2.1704	0.047625	0.26953	0.02998	0.61407
Mfap4	-0.1408	-1.9158	0.047838	0.27044	0.055394	0.62226
Smpdl3b	-0.14074	-1.685	0.047935	0.27091	0.091992	0.66231
Nipa1	-0.14067	-2.373	0.048051	0.27142	0.017646	0.58216
Nbas	-0.14065	-1.5513	0.048109	0.27158	0.12083	0.67585
Tmem38b	-0.14058	-2.2823	0.048215	0.27198	0.022473	0.6009
Prl4a1	-0.14057	-2.3563	0.048215	0.27198	0.01846	0.58597
Rbck1	-0.14029	-1.9188	0.048718	0.2742	0.05501	0.62226
Vmn2r34	-0.14029	-1.151	0.048728	0.2742	0.24972	0.75128
Mtrf1l	-0.14019	-0.92563	0.048844	0.2744	0.35464	0.80542
Smc5	-0.14019	-1.1851	0.048805	0.2744	0.23597	0.74737
Zfp574	-0.14006	-1.4623	0.049008	0.27518	0.14365	0.68624
Dnase1	-0.14003	-2.0524	0.049057	0.27537	0.040129	0.61574
Otud6a	-0.13995	-1.6153	0.049173	0.27595	0.10626	0.66688
Gnpat	-0.13977	-2.5328	0.049463	0.27678	0.011315	0.56529
Fam110c	-0.13975	-1.1453	0.049502	0.27678	0.2521	0.75223
Mrgprb3	-0.13975	-2.0405	0.049482	0.27678	0.041305	0.61574
Vmn1r17	-0.13957	-2.1371	0.04985	0.27809	0.032586	0.61574
Cebpg	-0.1395	-1.5745	0.049908	0.27832	0.11537	0.6729
St7	-0.1395	-2.0997	0.049918	0.27832	0.035757	0.61574
Pygo2	-0.13936	-2.2489	0.050053	0.27872	0.024519	0.6027
Ctf1	-0.13934	-2.2961	0.050092	0.27872	0.021669	0.6009
Zfp84	-0.13932	-1.0053	0.050111	0.27872	0.31475	0.7841
Snap29	-0.13931	-1.8661	0.05015	0.27878	0.062028	0.6317
Cep350	-0.13921	-2.0674	0.050285	0.27916	0.038697	0.61574
Cux1	-0.13913	-2.2565	0.050469	0.27966	0.024037	0.60116
Rtn4r	-0.13902	-2.1785	0.050682	0.28046	0.029371	0.61164
Irs4	-0.13885	-2.5954	0.051001	0.2817	0.0094493	0.53054
Ap3b1	-0.13878	-2.3912	0.05105	0.28187	0.016796	0.58216
Slc25a12	-0.13878	-1.7072	0.051059	0.28187	0.087791	0.6618
Spns1	-0.13863	-1.8412	0.05132	0.28286	0.065596	0.63519
Rusc2	-0.13857	-2.1956	0.051417	0.28295	0.028122	0.61153
Olfr1512	-0.13855	-2.2096	0.051437	0.28295	0.027136	0.61153
Spaca6	-0.13854	-2.4427	0.051446	0.28295	0.014579	0.58216
Zfp956	-0.1385	-1.8254	0.051543	0.28323	0.067936	0.63838
Ccdc78	-0.13848	-0.98781	0.051543	0.28323	0.32324	0.78854
Scaf4	-0.13824	-1.9017	0.051998	0.284	0.057213	0.6252
Slain2	-0.13821	-1.8733	0.052027	0.284	0.061033	0.6309
Rsph14	-0.1382	-2.0529	0.052027	0.284	0.040082	0.61574
Hscb	-0.13808	-0.75696	0.052249	0.28484	0.44907	0.84196
Wnt16	-0.13808	-1.8761	0.052259	0.28484	0.060635	0.6309
Myt1l	-0.13805	-2.1258	0.052288	0.28492	0.033523	0.61574
Herpud1	-0.13804	-1.0687	0.052307	0.28495	0.28522	0.76902
Murc	-0.13799	-1.9657	0.052423	0.28519	0.049334	0.61574
Ivd	-0.13795	-1.7051	0.052491	0.28526	0.088167	0.6618
Lclat1	-0.13787	-1.9791	0.052656	0.28587	0.047804	0.61574
Tspan14	-0.13766	-1.6219	0.053042	0.28772	0.10482	0.66487
Ptx3	-0.1376	-1.8473	0.053139	0.28805	0.06471	0.63355
Rps20	-0.13759	-0.44917	0.053159	0.28805	0.65331	0.91193
Slc2a7	-0.13755	-0.82892	0.053217	0.28824	0.40715	0.82508
Slamf7	-0.13752	-1.8324	0.053323	0.28856	0.066884	0.63665
Pddc1	-0.13742	-2.2709	0.053516	0.28918	0.023155	0.6009
Commd7	-0.13736	-1.8764	0.053623	0.28945	0.060602	0.6309
Tlr12	-0.13731	-1.7714	0.053739	0.29	0.076488	0.64791
Alg6	-0.13726	-0.58208	0.053807	0.29015	0.56052	0.88241
Hdac4	-0.13711	-1.8999	0.054039	0.29048	0.057453	0.6253
Camsap1	-0.13704	-2.0355	0.054194	0.29094	0.041801	0.61574
Ssrp1	-0.13704	-0.44703	0.054184	0.29094	0.65485	0.91242
Mcoln1	-0.13696	-1.945	0.05431	0.29126	0.051779	0.61869
Atmin	-0.13694	-1.6719	0.054358	0.29144	0.094542	0.66324
Col6a2	-0.1369	-1.7913	0.054436	0.29163	0.073244	0.64237
Nfatc2ip	-0.13687	-1.9778	0.054523	0.29195	0.047948	0.61574
Nsmce2	-0.13682	-1.6817	0.054629	0.29236	0.092619	0.66247
Hmgcr	-0.13672	-1.7681	0.054774	0.29267	0.077036	0.64791
Rxra	-0.1367	-1.9524	0.054784	0.29267	0.050894	0.6164
Carm1	-0.13669	-1.1921	0.054793	0.29267	0.23321	0.74565
Sp1	-0.13667	-1.5267	0.054813	0.29267	0.12685	0.67811
Spata18	-0.13667	-2.6417	0.054813	0.29267	0.0082489	0.51367
Rpl10l	-0.13666	-2.3282	0.054832	0.29267	0.0199	0.59771
Nfic	-0.13665	-2.6966	0.054852	0.29267	0.0070057	0.46422
Chodl	-0.13661	-1.6834	0.054919	0.29286	0.092291	0.66231
Cfdp1	-0.13658	-1.3133	0.055026	0.29304	0.18907	0.72097
Errfi1	-0.13654	-1.5459	0.055064	0.2931	0.12214	0.67661
Gaa	-0.13654	-1.9886	0.055064	0.2931	0.046748	0.61574
Micu3	-0.13652	-0.90946	0.055093	0.2931	0.36311	0.80862
Gps1	-0.13648	-0.80984	0.055122	0.29318	0.41803	0.82931
Atp5l	-0.13641	-1.2986	0.055229	0.29357	0.1941	0.72511
Pus7l	-0.13634	-2.0923	0.055384	0.29399	0.036407	0.61574
Itgb2l	-0.13625	-1.8663	0.055529	0.29459	0.062006	0.6317
Clcc1	-0.13622	-1.1795	0.055558	0.29466	0.23819	0.74793
Olfr156	-0.1362	-2.5231	0.055616	0.29482	0.011634	0.57225
Bend6	-0.1361	-2.1516	0.055771	0.29526	0.031428	0.61574
Slc27a2	-0.13609	-2.1061	0.055819	0.29529	0.035198	0.61574
Efcab3	-0.13608	-2.4624	0.055858	0.29537	0.0138	0.58216
Atxn7l2	-0.13607	-2.0652	0.055877	0.29537	0.038902	0.61574
Faim	-0.13591	-1.8635	0.056148	0.29627	0.062386	0.63231
Fam168b	-0.13559	-1.2459	0.056873	0.29919	0.21279	0.73499
Spata2l	-0.13544	-2.1487	0.057367	0.30102	0.031661	0.61574
Pih1d1	-0.13532	-2.0542	0.057686	0.3021	0.039954	0.61574
Slc6a7	-0.13512	-1.8966	0.058102	0.30303	0.057887	0.62757
Olfr516	-0.13502	-1.634	0.058315	0.30352	0.10226	0.66487
Elk3	-0.13494	-1.9894	0.058479	0.30392	0.046652	0.61574
Tmx2	-0.13485	-0.92916	0.058663	0.30465	0.3528	0.80471
Klf5	-0.13479	-1.1941	0.05876	0.305	0.23243	0.74563
Ano6	-0.13474	-1.9613	0.058886	0.30524	0.049844	0.61574
Agmat	-0.13473	-2.0675	0.058886	0.30524	0.038685	0.61574
H2-M10.1	-0.13472	-2.7162	0.058895	0.30524	0.0066039	0.45208
Mto1	-0.13455	-1.5175	0.059253	0.30633	0.12914	0.67959
Atr	-0.13452	-0.98112	0.059302	0.3065	0.32654	0.7896
Olfr1373	-0.13447	-1.5721	0.059389	0.30687	0.11592	0.6729
Celsr3	-0.13415	-1.6808	0.059969	0.30902	0.092797	0.66247
Zfr	-0.13405	-1.8679	0.060104	0.30957	0.06177	0.6317
Prdm15	-0.13404	-1.9667	0.060124	0.30959	0.049221	0.61574
Mboat7	-0.13402	-1.7184	0.060153	0.30966	0.085721	0.6618
Galt	-0.13387	-2.3726	0.06052	0.31063	0.017663	0.58216
Krtap20-2	-0.13382	-2.0978	0.060598	0.31073	0.035922	0.61574
Olfr1301	-0.1338	-0.60196	0.060666	0.31073	0.5472	0.87935
Ooep	-0.1338	-1.9571	0.060666	0.31073	0.050339	0.61618
Adamts10	-0.13366	-2.0733	0.061072	0.31188	0.038146	0.61574
Slx4	-0.13366	-1.8107	0.061082	0.31188	0.070193	0.63838
Angpt2	-0.13365	-2.0648	0.061082	0.31188	0.038942	0.61574
Slc3a1	-0.1336	-1.8158	0.061188	0.31211	0.069397	0.63838
Nf2	-0.13358	-1.0594	0.061217	0.31219	0.28941	0.77133
9130401M01Rik	-0.13341	-2.4709	0.061478	0.3129	0.013478	0.58216
Gm20917	-0.13339	-1.4953	0.33011	0.71396	0.13484	0.67959
Syne1	-0.13336	-1.2378	0.061662	0.31353	0.2158	0.73671
Zc3h7a	-0.13328	-2.5915	0.061855	0.31404	0.0095546	0.531
Creg1	-0.13321	-1.7952	0.062059	0.31469	0.072616	0.64237
Stk19	-0.1332	-1.9684	0.062117	0.31491	0.049025	0.61574
Atoh8	-0.13317	-1.8442	0.062165	0.31507	0.065161	0.63519
8430419L09Rik	-0.13316	-2.2951	0.062194	0.31507	0.021725	0.6009
Anxa11	-0.13311	-1.4631	0.062339	0.31565	0.14345	0.68589
Ccdc101	-0.13304	-0.92235	0.062504	0.31621	0.35635	0.8061
1810037I17Rik	-0.13302	-2.277	0.062533	0.31621	0.022785	0.6009
Adam11	-0.13287	-1.147	0.0629	0.31761	0.25136	0.75223
Ube2i	-0.13284	-0.78964	0.062968	0.31774	0.42974	0.83382
Sppl2b	-0.13282	-1.649	0.062997	0.31778	0.099154	0.66445
Megf8	-0.13279	-1.6945	0.063055	0.31794	0.090166	0.6618
Asap1	-0.13266	-1.9823	0.063336	0.31887	0.047449	0.61574
Vmn2r57	-0.13266	-2.3863	0.063326	0.31887	0.017021	0.58216
Ndufa9	-0.13264	-0.90096	0.063345	0.31887	0.36761	0.81058
Vmn1r13	-0.13262	-1.3651	0.063384	0.31899	0.17221	0.70811
Fadd	-0.13249	-1.5102	0.063626	0.31997	0.13101	0.67959
Tmem50b	-0.13218	-2.4061	0.064245	0.3216	0.016126	0.58216
Rsrp1	-0.13213	-2.345	0.064284	0.32171	0.019028	0.59066
Rdx	-0.1321	-1.9281	0.064342	0.32177	0.053837	0.6212
Olfr531	-0.13207	-1.6206	0.06438	0.32189	0.10509	0.66487
Trim25	-0.132	-1.5541	0.064545	0.32252	0.12016	0.67563
G3bp2	-0.13196	-2.0104	0.064642	0.32288	0.044389	0.61574
Ehhadh	-0.1319	-2.0664	0.064767	0.32327	0.038791	0.61574
Alkbh7	-0.13189	-1.9039	0.064796	0.32334	0.056927	0.62484
Lemd3	-0.13186	-1.5111	0.064883	0.32346	0.13075	0.67959
Sult1c2	-0.13173	-1.835	0.065212	0.32463	0.066501	0.63589
Olfr157	-0.1316	-2.2757	0.065474	0.32538	0.022866	0.6009
Tmem136	-0.13159	-1.7938	0.065493	0.3254	0.072847	0.64237
Xdh	-0.13148	-2.2355	0.065802	0.32649	0.025385	0.61153
Zfp512	-0.13144	-2.8109	0.065899	0.32671	0.0049399	0.37137
Spin2c	-0.13129	-1.1296	0.066189	0.32768	0.25866	0.7557
Olfr212	-0.13128	-1.7639	0.066247	0.32772	0.077755	0.64791
Olfr15	-0.13126	-2.2657	0.066276	0.32772	0.02347	0.6009
Nagpa	-0.13104	-2.0307	0.066731	0.32895	0.042281	0.61574
Senp5	-0.13101	-2.3711	0.06677	0.32906	0.017733	0.58216
Fbxo48	-0.13096	-1.5067	0.066857	0.32941	0.13189	0.67959
Tsn	-0.13093	-1.9455	0.066925	0.32959	0.051709	0.61869
Snai2	-0.13087	-1.8876	0.067041	0.33007	0.059081	0.62928
Ipo8	-0.13086	-1.8261	0.067118	0.33007	0.06784	0.63838
Dnajc14	-0.13078	-2.2512	0.067331	0.33096	0.024373	0.6027
Mrps23	-0.13075	-1.9659	0.067389	0.33113	0.049309	0.61574
Rimbp3	-0.13067	-1.6024	0.067689	0.33208	0.10908	0.66955
Slc25a13	-0.13067	-1.6959	0.067689	0.33208	0.089905	0.6618
Spice1	-0.1305	-1.6745	0.068066	0.33322	0.094031	0.66324
Tnfrsf14	-0.13048	-2.0399	0.068086	0.33324	0.04136	0.61574
Adora2a	-0.13047	-1.6247	0.068124	0.33335	0.10422	0.66487
Acsl1	-0.13046	-1.3116	0.068153	0.33341	0.18967	0.72161
Phldb2	-0.13044	-2.5989	0.068182	0.33348	0.0093519	0.53054
Ep300	-0.13042	-1.7849	0.068231	0.33363	0.074284	0.6435
Tecta	-0.13032	-1.6071	0.068453	0.33409	0.10802	0.66955
Pygl	-0.13024	-1.9416	0.068656	0.33484	0.052184	0.62038
Rab3il1	-0.13019	-1.5188	0.068743	0.33511	0.12882	0.67959
Atp5a1	-0.13015	-0.63641	0.068782	0.33522	0.52451	0.86981
Atp2b2	-0.13001	-1.7714	0.069169	0.33667	0.076495	0.64791
Ccl21b	-0.12999	-1.8893	0.069227	0.33667	0.058855	0.62768
Gstt4	-0.12994	-1.9625	0.069353	0.33709	0.049706	0.61574
Olfr655	-0.12989	-1.7896	0.069479	0.3375	0.073524	0.64237
Cbr1	-0.12984	-2.1946	0.069508	0.33756	0.028194	0.61153
Slc30a3	-0.12981	-1.5036	0.069546	0.33767	0.13267	0.67959
Xpo5	-0.12971	-1.2276	0.069711	0.33831	0.21961	0.73962
Gm5346	-0.12968	-1.6274	0.06974	0.33837	0.10365	0.66487
Upf3b	-0.12962	-1.7969	0.069914	0.33896	0.072347	0.64198
Gga1	-0.1296	-2.0912	0.069943	0.33896	0.036507	0.61574
Rpp25	-0.12959	-1.7496	0.069943	0.33896	0.080185	0.65045
Tpd52	-0.12948	-1.7407	0.070117	0.33964	0.081732	0.65442
Lta	-0.12947	-1.6267	0.070165	0.3398	0.10381	0.66487
Stmn4	-0.12943	-1.6253	0.070223	0.33992	0.1041	0.66487
4931406B18Rik	-0.12933	-1.8087	0.070456	0.34088	0.070504	0.63838
Pan3	-0.12928	-1.5636	0.070543	0.34107	0.11791	0.67563
Hist1h1b	-0.12926	-1.3391	0.070591	0.34122	0.18054	0.71488
Rnf44	-0.12913	-2.4327	0.070949	0.34271	0.014987	0.58216
Cplx2	-0.12907	-0.67465	0.071123	0.34347	0.4999	0.86139
Rag2	-0.12899	-1.6568	0.071278	0.34406	0.097551	0.66405
Svs5	-0.12885	-2.2262	0.071597	0.3452	0.025998	0.61153
Npm3	-0.12883	-1.6684	0.071646	0.34528	0.095233	0.66405
Itgb1	-0.12881	-1.8029	0.071675	0.34528	0.0714	0.63838
Car6	-0.1288	-1.8631	0.071675	0.34528	0.062453	0.63231
Neurl3	-0.12875	-1.2788	0.071771	0.34528	0.20098	0.72777
Myo1b	-0.12868	-1.9189	0.071984	0.34593	0.054995	0.62226
Mbnl2	-0.12865	-1.6243	0.072042	0.34595	0.10431	0.66487
Phlda1	-0.12865	-1.92	0.072062	0.34595	0.054855	0.62226
Gm13124	-0.12858	-1.629	0.072236	0.34658	0.10332	0.66487
Nckap1l	-0.12855	-1.2415	0.072303	0.34675	0.21441	0.73534
Egr4	-0.12853	-1.4938	0.072323	0.34675	0.13522	0.67959
Sept5	-0.12853	-1.691	0.072313	0.34675	0.090841	0.6618
Sdf4	-0.12841	-1.9959	0.072671	0.34778	0.04594	0.61574
Fam170b	-0.12836	-2.0564	0.072826	0.34797	0.039745	0.61574
St7l	-0.12836	-1.8684	0.072835	0.34797	0.061704	0.6317
Tbx21	-0.12818	-1.7462	0.073271	0.34968	0.080772	0.65106
Ccr2	-0.12816	-2.1423	0.073358	0.3499	0.032168	0.61574
Bex6	-0.12814	-2.4372	0.073435	0.34998	0.014802	0.58216
Trappc4	-0.12806	-0.85479	0.073638	0.35046	0.39267	0.81992
Ypel5	-0.12805	-1.4314	0.073658	0.35046	0.15232	0.69269
2310035C23Rik	-0.12799	-1.733	0.073842	0.35046	0.083097	0.65543
Rfc5	-0.12797	-0.62154	0.073909	0.35058	0.53424	0.87306
Sox1	-0.12789	-1.8673	0.074045	0.35078	0.061865	0.6317
Ptk2	-0.12783	-1.6869	0.074132	0.35082	0.091626	0.66231
Rpap3	-0.12783	-1.1904	0.074132	0.35082	0.23389	0.74607
1700013G24Rik	-0.12782	-1.7136	0.07419	0.35082	0.086594	0.6618
Cnbd2	-0.12778	-1.7169	0.074306	0.35121	0.085997	0.6618
Dbp	-0.12773	-2.3008	0.074364	0.35137	0.021401	0.6009
Tro	-0.1277	-1.4752	0.074422	0.35152	0.14017	0.6827
Gm4070	-0.12768	-1.3418	0.074499	0.3518	0.17965	0.71488
F8	-0.12765	-0.94541	0.074596	0.35218	0.34445	0.79977
Aqp3	-0.12761	-1.5217	0.074664	0.3523	0.12808	0.67912
Lhfpl5	-0.12758	-1.4389	0.074741	0.35246	0.15019	0.69185
Acvr1	-0.12753	-1.2105	0.074896	0.35271	0.2261	0.74282
Olfr1014	-0.12752	-1.9882	0.074915	0.35272	0.046785	0.61574
Rtn3	-0.12742	-1.8621	0.075138	0.35345	0.062594	0.63231
Fam3b	-0.12738	-1.7739	0.075225	0.35353	0.07608	0.64791
Vnn1	-0.12729	-1.8473	0.075505	0.35446	0.064701	0.63355
Myh2	-0.12725	-2.6298	0.075525	0.35446	0.0085434	0.51949
Slc39a7	-0.12723	-0.44971	0.075573	0.35449	0.65292	0.91175
Aldh1l1	-0.12719	-2.6308	0.07566	0.35469	0.0085194	0.51949
Atp13a1	-0.12716	-1.702	0.075747	0.35491	0.088752	0.6618
Pkib	-0.12716	-2.2695	0.075738	0.35491	0.02324	0.6009
Hpn	-0.12706	-1.5093	0.075979	0.3553	0.13123	0.67959
Enpp2	-0.12698	-1.3235	0.076144	0.35561	0.18569	0.71929
Gpsm3	-0.1269	-1.5655	0.076289	0.35579	0.11746	0.67563
Zfp446	-0.12674	-0.60433	0.076676	0.35711	0.54563	0.87898
Pdlim7	-0.12669	-1.6436	0.076811	0.35758	0.10025	0.66445
Ctnnb1	-0.12662	-1.7472	0.076957	0.35798	0.08061	0.65106
Ugt1a9	-0.12656	-1.8159	0.07716	0.35847	0.069392	0.63838
Rhot2	-0.12651	-2.0566	0.077266	0.35858	0.03972	0.61574
Txndc5	-0.12649	-1.9094	0.077305	0.35858	0.056204	0.62377
Mzt1	-0.12645	-1.2705	0.077411	0.35883	0.20389	0.72855
Ell3	-0.12644	-2.4332	0.077479	0.35899	0.014968	0.58216
Emp2	-0.12639	-1.6507	0.077595	0.3592	0.098792	0.66445
Olfr571	-0.12623	-2.2959	0.078021	0.35994	0.02168	0.6009
Vgll3	-0.12622	-2.1827	0.07805	0.35994	0.029057	0.61153
Pycrl	-0.12619	-1.7262	0.078117	0.36007	0.08431	0.65924
Cadm2	-0.12618	-1.8751	0.078156	0.36007	0.060778	0.6309
Mical2	-0.12614	-1.9923	0.078263	0.36037	0.046338	0.61574
Tmcc3	-0.12612	-1.7954	0.078282	0.36037	0.072587	0.64237
Ccpg1os	-0.12611	-1.7919	0.078301	0.36037	0.073153	0.64237
Asap3	-0.1261	-2.2103	0.07834	0.36039	0.027082	0.61153
Ddx17	-0.12603	-1.5184	0.078456	0.36052	0.12892	0.67959
Uaca	-0.12602	-2.2506	0.078533	0.36064	0.024411	0.6027
Klk1b5	-0.12599	-0.89555	0.078611	0.3608	0.37049	0.81131
Gm15023	-0.12584	-1.7063	0.07894	0.3615	0.087946	0.6618
Acsm1	-0.12582	-1.9944	0.079007	0.3615	0.046108	0.61574
Atp6v0b	-0.12572	-0.42981	0.079298	0.36234	0.66733	0.91519
Dhdds	-0.12564	-0.49328	0.079491	0.36302	0.62182	0.9012
Scd2	-0.12559	-0.62676	0.079694	0.36363	0.53082	0.872
Wdr31	-0.1255	-0.857	0.079917	0.36424	0.39145	0.81949
Tnfsf12	-0.12548	-2.2565	0.079946	0.36429	0.02404	0.60116
Ppp1r9a	-0.12539	-2.8912	0.080197	0.36512	0.0038373	0.33127
Cys1	-0.12536	-1.944	0.080275	0.36531	0.051899	0.6189
Pros1	-0.12531	-1.9315	0.080362	0.36539	0.053417	0.6212
Lrp6	-0.12518	-1.4359	0.080662	0.36659	0.15102	0.692
Khdrbs2	-0.12516	-1.6913	0.080691	0.36664	0.090777	0.6618
Rergl	-0.12512	-1.476	0.080778	0.36675	0.13994	0.68269
Gm21951	-0.12511	-1.4334	0.080826	0.36685	0.15174	0.6926
3110002H16Rik	-0.12499	-2.2963	0.081145	0.36798	0.021656	0.6009
Farsa	-0.1248	-0.58098	0.081552	0.3691	0.56125	0.88305
Iqch	-0.12479	-2.2413	0.08161	0.36911	0.025004	0.60745
Nr1i2	-0.12477	-2.4998	0.081745	0.3694	0.012425	0.58094
Inppl1	-0.12471	-1.7909	0.081929	0.37004	0.073307	0.64237
Slurp1	-0.12469	-1.558	0.081958	0.37004	0.11924	0.67563
Ezr	-0.12467	-1.8103	0.081977	0.37004	0.070251	0.63838
Arl9	-0.12447	-1.6056	0.082742	0.37289	0.10836	0.66955
Ulbp1	-0.12447	-1.6786	0.082751	0.37289	0.093236	0.66247
Tescl	-0.12439	-2.2465	0.082964	0.37344	0.024671	0.6036
Colgalt2	-0.12433	-2.1243	0.083061	0.37371	0.033643	0.61574
Hnrnph1	-0.12432	-1.1927	0.08308	0.37372	0.23299	0.74564
Erbb3	-0.12428	-1.2894	0.083187	0.37408	0.19726	0.72702
Slco2a1	-0.12426	-2.3497	0.083206	0.37408	0.018788	0.58677
Dse	-0.12425	-1.5165	0.083216	0.37408	0.1294	0.67959
Smagp	-0.12419	-1.6422	0.08339	0.37462	0.10055	0.66445
Prickle2	-0.12398	-1.3619	0.083932	0.37615	0.17324	0.70942
Mfsd12	-0.12394	-1.9301	0.084067	0.37635	0.053595	0.6212
Tlr11	-0.12394	-2.0541	0.084067	0.37635	0.039968	0.61574
Vwa7	-0.12389	-2.3207	0.084183	0.37659	0.020304	0.59771
Ero1l	-0.12388	-1.742	0.084193	0.37659	0.081515	0.65363
Igsf8	-0.12387	-1.7604	0.084231	0.37668	0.078337	0.64973
Sptb	-0.12376	-1.9984	0.084483	0.37748	0.045673	0.61574
Ablim2	-0.12367	-1.6225	0.084763	0.37824	0.1047	0.66487
Rnf152	-0.12364	-1.7574	0.08486	0.37843	0.078844	0.65015
Atp6ap2	-0.12359	-1.5451	0.085073	0.37918	0.12233	0.67661
Prkar1b	-0.12357	-1.7498	0.085102	0.37918	0.080161	0.65045
Olfr976	-0.12348	-2.117	0.085421	0.38028	0.034261	0.61574
Pdcd1	-0.12344	-1.5799	0.085499	0.38047	0.11413	0.6729
Fam150a	-0.12341	-1.9215	0.085528	0.38047	0.054664	0.62163
Angpt4	-0.12329	-1.6407	0.085837	0.38095	0.10086	0.66476
B4galt1	-0.12329	-1.1993	0.085837	0.38095	0.23041	0.74517
Sin3a	-0.12329	-1.2205	0.085818	0.38095	0.22227	0.73962
Slx	-0.12329	-1.6959	0.085857	0.38095	0.08991	0.6618
Snx12	-0.12326	-1.4769	0.085924	0.38096	0.13969	0.68258
Fxyd6	-0.1232	-1.2741	0.086118	0.38141	0.20262	0.72838
Csdc2	-0.12317	-1.9393	0.086224	0.38159	0.052466	0.62072
Ripk3	-0.12313	-1.8435	0.08634	0.3819	0.06526	0.63519
Tmem183a	-0.12308	-2.209	0.086505	0.3821	0.027174	0.61153
C78339	-0.12307	-1.7528	0.086514	0.3821	0.079631	0.65045
Zfyve21	-0.12304	-2.5417	0.086631	0.38212	0.011033	0.55903
Sgca	-0.12303	-2.019	0.086631	0.38212	0.04349	0.61574
Tgm3	-0.12301	-2.7284	0.086727	0.38247	0.0063639	0.44002
Peg10	-0.12298	-1.4297	0.086814	0.38257	0.15279	0.6937
Plekhb1	-0.12298	-1.7128	0.086814	0.38257	0.086757	0.6618
Il20rb	-0.1228	-1.8103	0.087521	0.38465	0.070246	0.63838
Klc4	-0.1228	-1.8399	0.087521	0.38465	0.06578	0.63519
Rhd	-0.12274	-2.2504	0.087646	0.38512	0.024423	0.6027
Snx27	-0.12272	-1.6556	0.087704	0.3853	0.097812	0.66405
Tmem198	-0.12266	-1.8966	0.087985	0.3856	0.057883	0.62757
Mtpn	-0.1226	-1.5068	0.088188	0.38594	0.13186	0.67959
Gm14085	-0.12252	-1.5553	0.088372	0.38642	0.11988	0.67563
Nrip1	-0.12249	-1.769	0.08843	0.38651	0.076901	0.64791
Use1	-0.12249	-1.4478	0.08843	0.38651	0.14767	0.6893
Wbp5	-0.12245	-2.0937	0.088546	0.38686	0.03629	0.61574
Olfr894	-0.12244	-1.9784	0.088546	0.38686	0.047888	0.61574
Ncoa5	-0.12234	-2.7914	0.088788	0.38767	0.0052486	0.38615
Ubd	-0.12231	-1.7085	0.088865	0.38792	0.087534	0.6618
Cox8a	-0.12227	-1.6638	0.088943	0.38801	0.096151	0.66405
Krtap19-1	-0.12213	-2.0461	0.089359	0.38917	0.040747	0.61574
Mycbp	-0.12213	-2.348	0.089359	0.38917	0.018872	0.5876
Olfr160	-0.12203	-2.0345	0.089707	0.3897	0.041897	0.61574
Cxadr	-0.12195	-2.4485	0.089949	0.39005	0.014345	0.58216
Zfpl1	-0.12192	-1.7657	0.090026	0.39005	0.077442	0.64791
Grxcr2	-0.12188	-2.33	0.090152	0.39005	0.019804	0.59684
Atp5d	-0.12184	-1.1501	0.09021	0.39005	0.25009	0.75128
Cenpb	-0.12183	-1.6285	0.090239	0.39005	0.10342	0.66487
Cxcl14	-0.12183	-1.6315	0.090239	0.39005	0.10279	0.66487
Fam133b	-0.12181	-1.7335	0.090316	0.39006	0.083004	0.65543
Ptgr1	-0.12181	-0.68837	0.090316	0.39006	0.49122	0.85862
Acsf3	-0.12179	-1.4771	0.090336	0.39006	0.13966	0.68258
1700055N04Rik	-0.12178	-1.5081	0.090403	0.39015	0.13153	0.67959
Cables2	-0.12177	-1.4799	0.090432	0.39015	0.13891	0.68238
Ifnlr1	-0.12177	-1.517	0.090432	0.39015	0.12926	0.67959
Tbc1d8	-0.12171	-1.7673	0.090626	0.39078	0.077178	0.64791
Birc2	-0.1217	-1.7833	0.090636	0.39078	0.074536	0.64426
Orm2	-0.12168	-0.74646	0.090674	0.39079	0.45539	0.84383
Tsta3	-0.12164	-1.6782	0.090839	0.39121	0.093311	0.66247
Anks3	-0.12163	-1.9944	0.090887	0.39121	0.046104	0.61574
Uba6	-0.12162	-1.4137	0.090926	0.3913	0.15744	0.69689
Hbp1	-0.12159	-1.9917	0.090994	0.39139	0.046402	0.61574
Olfr430	-0.12159	-0.55528	0.090994	0.39139	0.5787	0.89098
Olfr190	-0.1215	-1.2315	0.091322	0.39211	0.21815	0.73932
Plat	-0.12133	-1.9624	0.091864	0.39345	0.049716	0.61574
Nostrin	-0.12126	-2.2948	0.092106	0.39408	0.021746	0.6009
Gatsl2	-0.12116	-1.53	0.092445	0.39537	0.12601	0.67751
Snrpa	-0.12115	-0.70856	0.092464	0.39537	0.4786	0.85411
M1ap	-0.12101	-1.9852	0.092861	0.39665	0.047117	0.61574
Zfp53	-0.12087	-2.2288	0.093199	0.39769	0.025824	0.61153
Podxl2	-0.12081	-1.4058	0.093431	0.39843	0.15978	0.69758
Azgp1	-0.12077	-1.9732	0.093518	0.39847	0.048475	0.61574
Ammecr1	-0.12065	-1.9268	0.093992	0.39938	0.054008	0.6212
4933434E20Rik	-0.12061	-1.6199	0.094099	0.39955	0.10526	0.66487
Bloc1s4	-0.12055	-1.8774	0.094176	0.39979	0.060459	0.6309
Gimap3	-0.12046	-1.9023	0.094563	0.40094	0.057134	0.6252
Myrip	-0.12046	-1.765	0.094563	0.40094	0.077559	0.64791
Gm14474	-0.12037	-1.6591	0.094805	0.40151	0.097095	0.66405
Sim2	-0.12037	-2.0285	0.094824	0.40151	0.042513	0.61574
Ttc34	-0.12036	-1.6321	0.094844	0.40151	0.10266	0.66487
Fam219b	-0.1203	-2.3612	0.095028	0.40176	0.018217	0.58382
Rgcc	-0.1202	-1.5908	0.095395	0.40302	0.11166	0.67109
Vmn1r49	-0.12016	-0.49042	0.095511	0.40331	0.62383	0.90228
Hint3	-0.12008	-1.4473	0.095801	0.40383	0.14782	0.6893
Tmem254a	-0.12	-2.0371	0.096043	0.40423	0.041638	0.61574
Cep131	-0.11996	-1.8781	0.09615	0.40448	0.060362	0.6309
Pik3r3	-0.11994	-1.9708	0.096237	0.40464	0.048752	0.61574
Olfr323	-0.1199	-1.6385	0.096353	0.40471	0.10132	0.6648
Pate4	-0.1199	-1.3904	0.096353	0.40471	0.1644	0.70307
Ctnna3	-0.11986	-1.8788	0.096459	0.40487	0.060276	0.6309
Tcirg1	-0.11983	-1.3264	0.096614	0.40523	0.18472	0.71857
Kprp	-0.11979	-1.5268	0.096701	0.40535	0.12681	0.67811
Evx2	-0.11978	-1.8195	0.096721	0.40535	0.068833	0.63838
Mapk8	-0.11977	-1.4822	0.096721	0.40535	0.13828	0.68155
4930447A16Rik	-0.11975	-2.2621	0.09675	0.40539	0.023688	0.6009
Nfkbia	-0.11969	-1.6172	0.096904	0.40587	0.10584	0.66567
Sult5a1	-0.11949	-1.3291	0.09764	0.40805	0.18381	0.71854
Gm2012	-0.11947	-0.94011	0.23996	0.63441	0.34716	0.8024
Olfr1093	-0.11947	-2.2349	0.097727	0.40828	0.025426	0.61153
Fcho2	-0.11946	-1.9554	0.097765	0.40828	0.050533	0.6164
Vmn1r16	-0.11946	-2.2928	0.097765	0.40828	0.021859	0.6009
Ugdh	-0.11931	-1.8031	0.09823	0.40985	0.071369	0.63838
Trank1	-0.11929	-2.0966	0.098278	0.40988	0.036029	0.61574
Bcdin3d	-0.11928	-1.5972	0.098297	0.40988	0.11023	0.67109
Flcn	-0.11916	-2.263	0.098713	0.41112	0.023633	0.6009
Foxq1	-0.11912	-1.442	0.098907	0.41159	0.14931	0.69036
Rbm44	-0.11912	-1.2115	0.098907	0.41159	0.22569	0.74236
Mbd1	-0.11911	-2.127	0.098965	0.41167	0.033424	0.61574
Tfe3	-0.11908	-1.39	0.099004	0.41167	0.16453	0.70307
Itgb5	-0.11906	-1.5032	0.099071	0.41178	0.13279	0.67959
Ncor2	-0.11893	-1.5571	0.099574	0.41304	0.11945	0.67563
Mvd	-0.11885	-0.87665	0.099855	0.41362	0.38068	0.81581
Pi4k2a	-0.1188	-1.7126	0.099971	0.41402	0.086784	0.6618
Srgn	-0.1188	-1.457	0.10001	0.4141	0.14512	0.68793
Olfr330	-0.11877	-1.2524	0.10005	0.41418	0.21041	0.73369
Cnih1	-0.11874	-1.8235	0.10014	0.41429	0.06823	0.63838
Gm4847	-0.11862	-1.3553	0.10045	0.41532	0.17532	0.71047
Chmp6	-0.11859	-0.52131	0.10055	0.41551	0.60215	0.89552
Plekhh2	-0.1185	-1.2503	0.10075	0.41605	0.2112	0.73478
Myo1e	-0.11848	-1.4398	0.1008	0.41605	0.14991	0.69127
A630023A22Rik	-0.11842	-1.829	0.10102	0.4166	0.067398	0.6373
Cyb5r2	-0.11841	-1.7254	0.10104	0.41663	0.084448	0.65981
Olfr173	-0.1184	-1.499	0.10108	0.41671	0.13389	0.67959
Rbm18	-0.11838	-1.5077	0.10112	0.41678	0.13163	0.67959
Tcf19	-0.11836	-1.992	0.10117	0.41682	0.046371	0.61574
Acot8	-0.11831	-1.6749	0.10134	0.41732	0.093957	0.66324
Nhlh1	-0.11824	-1.9461	0.10159	0.41803	0.05164	0.61869
Elmod2	-0.11823	-1.2904	0.10163	0.4181	0.1969	0.72702
Ccl20	-0.11821	-2.0689	0.1017	0.4181	0.038558	0.61574
Cdh5	-0.11815	-1.5973	0.10183	0.4181	0.1102	0.67109
Gp5	-0.11811	-1.9089	0.10191	0.4181	0.056279	0.62408
Olfr488	-0.11811	-1.6959	0.1019	0.4181	0.089904	0.6618
Olfr47	-0.11807	-1.4336	0.10204	0.41824	0.15169	0.6926
Swsap1	-0.11805	-1.4824	0.10211	0.41843	0.13825	0.68155
Hand2	-0.11803	-1.9033	0.10218	0.41863	0.057006	0.62494
Zcchc18	-0.11801	-1.7204	0.10225	0.41878	0.085357	0.6618
Clec2d	-0.11789	-1.7944	0.10256	0.41947	0.072753	0.64237
Ufsp1	-0.11789	-1.653	0.10256	0.41947	0.098321	0.66445
Itgb1bp2	-0.11783	-1.9983	0.10273	0.41964	0.045685	0.61574
Olfr957	-0.11782	-1.5922	0.10274	0.41964	0.11134	0.67109
Tle3	-0.11758	-2.4218	0.10341	0.42116	0.015444	0.58216
Cpn1	-0.11746	-1.6128	0.10372	0.42188	0.1068	0.66792
Gas2l3	-0.11729	-1.2815	0.10428	0.42312	0.20003	0.72768
Gm766	-0.11729	-1.7759	0.10427	0.42312	0.075754	0.64791
Nrl	-0.11726	-2.0381	0.10434	0.42328	0.041543	0.61574
Kank3	-0.11724	-1.64	0.10438	0.42328	0.101	0.66476
5730409E04Rik	-0.11723	-1.8044	0.10444	0.42328	0.071173	0.63838
Fignl2	-0.11723	-1.8906	0.10444	0.42328	0.058677	0.62768
2310036O22Rik	-0.11721	-1.5387	0.10449	0.42332	0.12387	0.67661
Scn5a	-0.1172	-1.8942	0.10454	0.42335	0.058198	0.62757
Olfr74	-0.11718	-1.8241	0.10465	0.42365	0.068133	0.63838
Snapc1	-0.11708	-0.70801	0.10486	0.42406	0.47894	0.85411
Gpr19	-0.117	-2.1102	0.1051	0.42462	0.03484	0.61574
Gprc5b	-0.11697	-2.1079	0.1052	0.4248	0.035035	0.61574
Prrt3	-0.11693	-2.5375	0.10535	0.42522	0.011165	0.56163
Melk	-0.11691	-1.7913	0.10544	0.42524	0.073241	0.64237
Srm	-0.11688	-2.0781	0.10551	0.42547	0.037702	0.61574
Nfia	-0.11684	-1.4764	0.10558	0.42566	0.13983	0.68269
Fem1c	-0.1168	-1.8762	0.1058	0.42614	0.06063	0.6309
Epas1	-0.11666	-1.7679	0.10629	0.42738	0.077081	0.64791
Ptprq	-0.11661	-2.1853	0.10646	0.42788	0.028864	0.61153
Nme4	-0.11659	-1.5039	0.10649	0.4279	0.13262	0.67959
Shisa9	-0.11656	-2.52	0.10661	0.4279	0.011736	0.57324
Cdc42ep1	-0.11655	-2.1583	0.10661	0.4279	0.030902	0.61574
1700024P16Rik	-0.11646	-1.6826	0.10704	0.42871	0.092459	0.66247
Olfr368	-0.11632	-2.4193	0.10744	0.4298	0.015552	0.58216
Pilrb2	-0.11629	-1.7423	0.1075	0.42986	0.081459	0.65363
Soga1	-0.11621	-1.3552	0.10778	0.4304	0.17536	0.71047
Trim26	-0.11612	-1.7354	0.10813	0.4308	0.082675	0.6545
Wdr5b	-0.1161	-1.3884	0.10816	0.43082	0.16503	0.70345
Olfr1419	-0.11602	-1.7313	0.10849	0.43135	0.083405	0.65588
Olfm2	-0.11601	-1.8358	0.10856	0.43142	0.06639	0.63589
Sstr3	-0.116	-2.436	0.10864	0.43142	0.014849	0.58216
Garem	-0.11599	-1.2605	0.10865	0.43142	0.20748	0.73056
Klhl36	-0.11599	-2.1697	0.10866	0.43142	0.030029	0.61407
Arhgap10	-0.11595	-1.6511	0.1088	0.43175	0.098721	0.66445
Vmn1r38	-0.11595	-1.0738	0.10883	0.43178	0.2829	0.76783
Slc23a1	-0.11592	-1.943	0.10893	0.432	0.052016	0.61916
Ube2q2	-0.1159	-1.5008	0.10897	0.43207	0.1334	0.67959
Os9	-0.11585	-1.4377	0.10914	0.43242	0.15051	0.69192
Sbspon	-0.11584	-1.466	0.10916	0.43242	0.14265	0.68505
Canx	-0.11577	-1.814	0.10935	0.43296	0.069685	0.63838
Ppm1b	-0.11575	-2.0641	0.10941	0.43296	0.039004	0.61574
Meis1	-0.1157	-1.7313	0.1096	0.43296	0.083391	0.65588
Syt17	-0.11567	-0.98072	0.1097	0.43296	0.32673	0.78979
Gm9994	-0.11565	-1.7232	0.10978	0.43296	0.084845	0.66097
Gucy2c	-0.11564	-1.7909	0.1098	0.43296	0.07331	0.64237
6330416G13Rik	-0.11557	-1.4793	0.11013	0.43354	0.13905	0.68243
Olfr1258	-0.11553	-2.1801	0.11025	0.43359	0.029252	0.61153
Cyhr1	-0.11534	-2.0486	0.11086	0.43508	0.040501	0.61574
Ndufa4l2	-0.11532	-1.3604	0.11091	0.43519	0.1737	0.70945
Nipbl	-0.11524	-0.73697	0.11124	0.43582	0.46114	0.84778
Prodh	-0.11517	-0.61144	0.11147	0.43664	0.54091	0.87688
Tdo2	-0.11513	-2.2074	0.11163	0.43707	0.027289	0.61153
Fam25c	-0.11504	-0.85893	0.11199	0.43797	0.39038	0.81924
Cd69	-0.11486	-2.0543	0.11276	0.43996	0.039945	0.61574
Panx3	-0.11486	-2.0386	0.11276	0.43996	0.041485	0.61574
Tas2r130	-0.11486	-1.5554	0.11277	0.43996	0.11986	0.67563
Sgip1	-0.11484	-1.4361	0.11279	0.43996	0.15098	0.692
Abcf3	-0.11483	-1.9052	0.11286	0.4401	0.056754	0.62484
Ppp2r5d	-0.11482	-2.4482	0.11287	0.4401	0.014356	0.58216
Kcnj2	-0.11478	-1.8639	0.1131	0.44059	0.062332	0.63231
Krtap6-2	-0.11474	-1.8142	0.11329	0.44126	0.069642	0.63838
Cdk2ap1	-0.1147	-1.6615	0.11341	0.44163	0.096614	0.66405
Pitpnc1	-0.11463	-1.3482	0.11365	0.44232	0.17761	0.7129
Tnfsf8	-0.11457	-2.2743	0.11389	0.44284	0.022949	0.6009
Cxcl12	-0.11456	-2.0226	0.11391	0.44284	0.043114	0.61574
Mreg	-0.1145	-1.3513	0.11412	0.44328	0.1766	0.71225
Slc25a51	-0.11444	-1.4657	0.11432	0.44374	0.14274	0.68505
Llph	-0.11441	-1.0303	0.11445	0.44394	0.30288	0.77882
Cc2d1b	-0.11429	-1.6915	0.11491	0.44504	0.090743	0.6618
Tbx15	-0.11424	-2.0178	0.11508	0.44541	0.043611	0.61574
Ereg	-0.11423	-1.9056	0.11511	0.44541	0.056707	0.62484
Rbfox2	-0.11421	-1.1722	0.11516	0.44551	0.24113	0.74926
Cd209b	-0.1141	-1.4443	0.11556	0.44638	0.14865	0.68996
Chn1	-0.11399	-2.0751	0.11608	0.44797	0.037977	0.61574
Rhox4f	-0.11386	-1.0283	0.11656	0.44929	0.30382	0.77969
Tmem40	-0.11371	-2.432	0.11711	0.45066	0.015017	0.58216
Xxylt1	-0.11369	-1.7131	0.11722	0.45078	0.086688	0.6618
Icos	-0.11368	-1.8113	0.11727	0.4508	0.070093	0.63838
Tlx3	-0.11368	-1.2993	0.11726	0.4508	0.19385	0.72471
Tomm40l	-0.11364	-1.5076	0.11738	0.45095	0.13165	0.67959
Nefm	-0.11363	-0.82339	0.11741	0.45095	0.41028	0.82674
Atf4	-0.11361	-0.97991	0.11745	0.45095	0.32713	0.79005
Gm20594	-0.1136	-1.9891	0.11747	0.45095	0.046689	0.61574
Hs3st2	-0.1136	-1.3451	0.11747	0.45095	0.17859	0.713
Por	-0.11337	-1.8069	0.11834	0.45299	0.070784	0.63838
Tns1	-0.11333	-2.0539	0.11847	0.4533	0.039982	0.61574
Fam3c	-0.11328	-2.3291	0.11867	0.45391	0.019855	0.59749
Pex16	-0.11326	-1.2673	0.11874	0.45409	0.20506	0.72864
Hcls1	-0.11297	-2.1725	0.11981	0.45693	0.02982	0.61247
Uprt	-0.11296	-1.6614	0.11989	0.45697	0.096627	0.66405
Rnf114	-0.11282	-1.5745	0.12042	0.4584	0.11537	0.6729
Nfu1	-0.11281	-2.0751	0.12046	0.4584	0.037973	0.61574
Bzw1	-0.11278	-1.6959	0.12059	0.45844	0.089906	0.6618
Nxf2	-0.11278	-1.4369	0.12056	0.45841	0.15074	0.69192
Krt6a	-0.11275	-1.6361	0.12071	0.45874	0.10182	0.66487
Snrk	-0.11274	-1.7545	0.12076	0.45877	0.079345	0.65045
Lef1	-0.11267	-1.6748	0.12107	0.45959	0.093974	0.66324
Rnpc3	-0.11266	-0.3458	0.12109	0.45959	0.72949	0.93422
Mrps18b	-0.11263	-1.354	0.12113	0.45965	0.17575	0.71047
Arid4a	-0.11258	-1.2812	0.12134	0.45988	0.20011	0.72777
Coro2b	-0.11257	-2.0084	0.12138	0.45988	0.044599	0.61574
Cmpk1	-0.11255	-0.54295	0.12141	0.45988	0.58716	0.89265
Bcl9	-0.11253	-1.5227	0.12151	0.46007	0.12783	0.67893
Trappc12	-0.11243	-1.8996	0.12182	0.46094	0.05749	0.6253
Il22ra1	-0.11239	-1.5027	0.12195	0.46116	0.13293	0.67959
Dnah5	-0.11236	-1.3573	0.12204	0.46132	0.1747	0.70962
Samd12	-0.11228	-1.8371	0.12243	0.46224	0.066197	0.63565
Btnl2	-0.11226	-2.2003	0.12257	0.46244	0.027783	0.61153
Capns1	-0.1122	-1.3049	0.12278	0.46262	0.19194	0.72284
Syt16	-0.1122	-2.0912	0.12277	0.46262	0.03651	0.61574
Csnk2a1	-0.11211	-1.2213	0.12307	0.46316	0.22198	0.73962
Mmachc	-0.11204	-0.79054	0.12347	0.46398	0.42921	0.83382
Hyal3	-0.11201	-1.3566	0.12358	0.46398	0.17491	0.71002
Rab39b	-0.11201	-1.3486	0.12358	0.46398	0.17747	0.71289
Olfr768	-0.11199	-1.2434	0.1236	0.46398	0.21372	0.73528
Stk16	-0.11187	-1.426	0.12403	0.46473	0.15388	0.69411
Bri3	-0.11182	-1.1927	0.12422	0.46509	0.23298	0.74564
Hes3	-0.11176	-2.0435	0.1245	0.46569	0.041001	0.61574
Cnih3	-0.11175	-1.738	0.12451	0.46569	0.082214	0.6545
Mapk13	-0.11167	-1.0643	0.1248	0.46608	0.28719	0.77005
Shisa4	-0.11167	-1.5737	0.1248	0.46608	0.11555	0.6729
Krit1	-0.11164	-1.313	0.12492	0.46626	0.18918	0.72097
Ccnd2	-0.11163	-1.7288	0.125	0.46646	0.083847	0.65694
Kcnk1	-0.11159	-1.7166	0.12511	0.46673	0.08605	0.6618
Apoc2	-0.11154	-1.5415	0.12522	0.46704	0.12321	0.67661
Prmt8	-0.11151	-1.0141	0.12535	0.46704	0.31055	0.78207
Ipcef1	-0.11148	-1.3698	0.12546	0.46734	0.17073	0.70679
Nup98	-0.11145	-0.8033	0.12566	0.46775	0.4218	0.83039
Efcab2	-0.11142	-1.6941	0.12581	0.46797	0.090242	0.6618
Btbd11	-0.1114	-1.3634	0.12589	0.46818	0.17277	0.70839
Hsf5	-0.11135	-1.6039	0.12607	0.46828	0.10875	0.66955
Fbxl13	-0.11134	-0.65926	0.12612	0.46828	0.50973	0.86424
Tial1	-0.11129	-1.283	0.12632	0.46862	0.19949	0.72768
Cldn9	-0.11128	-1.9272	0.1264	0.46874	0.053958	0.6212
Tdgf1	-0.11125	-2.4826	0.12647	0.4689	0.013043	0.58216
Icam4	-0.11113	-1.8803	0.12692	0.46966	0.060067	0.6305
Slc25a33	-0.11107	-2.3028	0.12708	0.47	0.021292	0.6009
Ube2r2	-0.11105	-1.7766	0.12711	0.47	0.075636	0.64791
Vcp	-0.11102	-0.46315	0.12716	0.47	0.64326	0.90902
Olfr71	-0.111	-1.8881	0.12724	0.47	0.059016	0.62892
Lce1b	-0.11099	-1.8601	0.1273	0.47	0.062867	0.63268
Olfr575	-0.11099	-1.593	0.12731	0.47	0.11116	0.67109
Stac3	-0.11099	-1.7887	0.1273	0.47	0.07366	0.64237
Slc22a26	-0.11098	-1.8385	0.12731	0.47	0.065982	0.63519
Tmem221	-0.11096	-1.8496	0.12739	0.47011	0.064368	0.63355
Zbtb38	-0.11087	-2.0236	0.12787	0.47106	0.043007	0.61574
Chrd	-0.11082	-2.0535	0.1281	0.47133	0.040028	0.61574
H1fx	-0.1108	-1.4798	0.12818	0.47153	0.13892	0.68238
Mapk8ip3	-0.11071	-1.9929	0.12854	0.47234	0.046271	0.61574
Ctcfl	-0.11059	-1.1409	0.12889	0.47312	0.25391	0.75293
Lrrc49	-0.11059	-2.0122	0.12888	0.47312	0.044195	0.61574
Clca1	-0.11057	-1.7237	0.12893	0.47312	0.084758	0.66074
Tm2d1	-0.11057	-1.2132	0.12894	0.47312	0.22503	0.74218
Sp9	-0.11055	-1.7157	0.129	0.47312	0.086219	0.6618
Zbtb41	-0.11048	-1.7879	0.12936	0.47405	0.073797	0.64249
Hmgn1	-0.11047	-2.0092	0.1294	0.47405	0.044512	0.61574
L1cam	-0.11043	-1.5186	0.12953	0.47405	0.12885	0.67959
Pramel1	-0.11042	-1.7079	0.12954	0.47405	0.08766	0.6618
Pde6g	-0.11041	-1.4841	0.12964	0.47428	0.13779	0.68155
Krtap6-1	-0.11038	-1.7492	0.12978	0.47445	0.08026	0.65045
Ccdc85c	-0.11031	-2.0959	0.13002	0.4747	0.036088	0.61574
Herpud2	-0.11023	-1.7823	0.13038	0.47555	0.074708	0.64449
Ly6k	-0.11018	-1.1734	0.13058	0.47612	0.24065	0.74897
Olfr866	-0.11018	-1.8591	0.13055	0.4761	0.063006	0.63268
Spg20	-0.11015	-1.0547	0.1307	0.47616	0.29155	0.77247
Zfp760	-0.11012	-1.347	0.13082	0.4765	0.17798	0.71291
Spt1	-0.10997	-1.6738	0.13144	0.47816	0.094166	0.66324
Acat1	-0.10996	-1.7839	0.13153	0.47823	0.074448	0.64399
Il22	-0.1099	-2.0475	0.13176	0.47864	0.040608	0.61574
Tnfaip8l1	-0.10989	-1.6264	0.13181	0.47864	0.10386	0.66487
Sec14l1	-0.10988	-1.1343	0.13183	0.47864	0.25667	0.75497
Fam162a	-0.10984	-1.4644	0.13195	0.47871	0.14308	0.68589
Sox3	-0.10982	-1.9777	0.13208	0.47872	0.047967	0.61574
Acot11	-0.1098	-1.3369	0.13219	0.47882	0.18126	0.71547
Gm5901	-0.10979	-1.5217	0.13222	0.47882	0.12808	0.67912
Mlx	-0.10967	-1.7568	0.13279	0.47988	0.078957	0.65015
Gpc6	-0.10962	-1.6128	0.13304	0.48042	0.10679	0.66792
Kin	-0.10945	-0.46052	0.13381	0.4816	0.64515	0.90944
5530400C23Rik	-0.10933	-1.6434	0.13429	0.4825	0.1003	0.66445
Apol11a	-0.10932	-0.73646	0.13435	0.48253	0.46145	0.84778
Ska3	-0.10925	-0.83938	0.13471	0.48351	0.40126	0.82322
Gorab	-0.1092	-2.3082	0.13494	0.48395	0.02099	0.59771
Ttc16	-0.10919	-1.9613	0.13495	0.48395	0.049849	0.61574
Gpr21	-0.10918	-2.122	0.13502	0.48403	0.033835	0.61574
Mrps27	-0.10909	-0.33668	0.13541	0.485	0.73636	0.93665
Ifi205	-0.10898	-2.1756	0.13583	0.48585	0.029585	0.61164
Samsn1	-0.10896	-1.6304	0.13592	0.48608	0.10302	0.66487
Hsf2	-0.10894	-1.5796	0.13599	0.48623	0.11419	0.6729
Gal3st2	-0.10889	-2.0903	0.13621	0.48693	0.036595	0.61574
Olfr1061	-0.10886	-1.0048	0.13632	0.48716	0.315	0.78424
Rab12	-0.10881	-1.6155	0.13655	0.48755	0.1062	0.66672
Rffl	-0.10879	-1.887	0.13665	0.48769	0.059154	0.62941
Tacstd2	-0.10878	-1.6398	0.13665	0.48769	0.10105	0.66476
Sgol2b	-0.10873	-1.2977	0.1369	0.48839	0.19441	0.72531
Loxl4	-0.10872	-1.9109	0.13696	0.48846	0.056017	0.62377
Ubap2l	-0.10864	-0.98642	0.13724	0.48892	0.32393	0.78863
Thsd1	-0.10862	-2.1834	0.13732	0.48906	0.029006	0.61153
Lsp1	-0.1086	-1.4167	0.13737	0.48906	0.15657	0.69599
Meis2	-0.1086	-1.2881	0.13737	0.48906	0.19772	0.72704
Cox4i1	-0.10858	-0.95642	0.13747	0.48931	0.33886	0.79645
Zfp810	-0.10852	-1.3228	0.13765	0.48973	0.18589	0.71946
Ercc8	-0.1085	-2.1429	0.13777	0.48989	0.032119	0.61574
Rbm10	-0.10846	-1.2864	0.13797	0.49027	0.19832	0.72733
H2afy2	-0.10842	-1.5505	0.13813	0.49052	0.12102	0.676
Anks1b	-0.10835	-1.3273	0.13849	0.49127	0.18442	0.71854
AU021092	-0.10835	-2.5012	0.13848	0.49127	0.012377	0.58094
Pdx1	-0.10825	-2.0202	0.13883	0.49189	0.043358	0.61574
Nt5c2	-0.10821	-1.618	0.139	0.49214	0.10566	0.66541
Ptgdr2	-0.10818	-1.8351	0.13905	0.49218	0.066498	0.63589
Myh4	-0.10811	-1.7345	0.13943	0.49284	0.082823	0.6545
Pgm3	-0.10811	-1.7637	0.13941	0.49284	0.077784	0.64791
Grm4	-0.10804	-2.0504	0.13971	0.49369	0.040321	0.61574
6430571L13Rik	-0.10802	-1.3274	0.13979	0.49371	0.18437	0.71854
Champ1	-0.10797	-1.8383	0.14004	0.49398	0.066021	0.63519
B3gnt9	-0.10792	-2.0485	0.14026	0.49434	0.040508	0.61574
Rgs5	-0.10789	-0.66438	0.14037	0.4944	0.50645	0.86306
Fam163b	-0.10788	-1.8028	0.14038	0.4944	0.071427	0.63838
S100pbp	-0.10775	-0.6378	0.14104	0.49546	0.5236	0.86951
Skint11	-0.10766	-1.5442	0.14137	0.49611	0.12253	0.67661
Nck2	-0.10765	-1.7545	0.14137	0.49611	0.079351	0.65045
Prdm16	-0.10748	-1.5994	0.14228	0.49821	0.10972	0.67109
Trpv5	-0.10748	-1.8909	0.14224	0.49821	0.058641	0.62768
Grem1	-0.10746	-2.1207	0.14232	0.49821	0.033948	0.61574
Klk4	-0.10746	-1.6975	0.14232	0.49821	0.089597	0.6618
Olfr1475	-0.10745	-1.3745	0.14235	0.49822	0.16929	0.70679
Rbm12b1	-0.10739	-0.80096	0.14265	0.4991	0.42315	0.83099
Uckl1	-0.10734	-1.2846	0.14286	0.49956	0.19892	0.7276
Dsn1	-0.10729	-1.6412	0.14321	0.50034	0.10076	0.66445
Ifi27l2b	-0.1072	-1.7658	0.14356	0.50126	0.077427	0.64791
Cldn1	-0.10711	-1.8655	0.14407	0.5016	0.062106	0.63188
Gm5460	-0.10711	-1.5235	0.14406	0.5016	0.12763	0.67884
Stbd1	-0.10711	-1.5749	0.14409	0.5016	0.11529	0.6729
Gm2825	-0.10708	-1.5302	0.46432	0.80462	0.12598	0.67751
Ankrd37	-0.10688	-1.8076	0.14498	0.50339	0.070666	0.63838
Zbtb21	-0.10688	-1.5786	0.145	0.50339	0.11444	0.6729
Gm5111	-0.10677	-1.3275	0.14555	0.5041	0.18435	0.71854
Nrg1	-0.10677	-1.5886	0.14554	0.5041	0.11215	0.67167
Cog1	-0.10676	-1.2728	0.14558	0.5041	0.20309	0.72838
Map4k5	-0.10676	-1.9627	0.14556	0.5041	0.04968	0.61574
Tmem158	-0.10671	-1.2865	0.14589	0.50448	0.19826	0.72733
Slc24a2	-0.10666	-1.7675	0.14603	0.50468	0.077144	0.64791
Fbln1	-0.10661	-1.6931	0.1462	0.50486	0.090445	0.6618
Cyp2b23	-0.1066	-1.084	0.14626	0.50493	0.27835	0.76616
Eln	-0.10655	-1.5264	0.14646	0.50534	0.12692	0.67811
Smim5	-0.10655	-1.8529	0.14646	0.50534	0.063896	0.63355
Galm	-0.10652	-1.8414	0.14659	0.50561	0.065568	0.63519
Adh6a	-0.10645	-1.8041	0.14685	0.50625	0.071217	0.63838
Olfr1505	-0.10644	-1.5757	0.14691	0.50628	0.1151	0.6729
Bckdha	-0.1064	-1.9665	0.14704	0.50646	0.049245	0.61574
Isl2	-0.10639	-2.0338	0.14708	0.50646	0.041973	0.61574
Boc	-0.10637	-1.5257	0.14721	0.50656	0.12709	0.67811
Plxnd1	-0.10635	-1.5383	0.14733	0.50686	0.12397	0.67661
Ankrd7	-0.10633	-1.556	0.14734	0.50686	0.1197	0.67563
AI837181	-0.10631	-2.0096	0.14748	0.50715	0.044473	0.61574
Camkv	-0.1063	-2.1974	0.14753	0.50715	0.027995	0.61153
Grid2ip	-0.1063	-1.8781	0.14753	0.50715	0.060362	0.6309
Dyx1c1	-0.10626	-1.2008	0.14775	0.50766	0.22982	0.7446
Zfp672	-0.10623	-2.0927	0.14792	0.50806	0.036374	0.61574
Ankrd35	-0.10621	-1.3746	0.14804	0.50823	0.16924	0.70679
Plxnb1	-0.10619	-1.2164	0.14807	0.50823	0.22384	0.74044
Stap2	-0.10616	-1.5566	0.14817	0.50841	0.11957	0.67563
Ak4	-0.10611	-2.5846	0.14841	0.50899	0.00975	0.53752
Tmem178	-0.10604	-1.8715	0.14872	0.50949	0.061273	0.63154
Tinf2	-0.10602	-0.51264	0.14879	0.50952	0.6082	0.89731
Grhl3	-0.10601	-1.8051	0.14881	0.50954	0.071061	0.63838
Retsat	-0.10599	-1.6795	0.14892	0.50954	0.093051	0.66247
1700012P22Rik	-0.10596	-2.1931	0.14902	0.50954	0.028301	0.61153
Abi3	-0.10595	-1.2612	0.14906	0.50954	0.20724	0.73056
Def8	-0.10595	-0.65208	0.14906	0.50954	0.51435	0.86612
Foxr2	-0.10595	-1.5178	0.14906	0.50954	0.12908	0.67959
Slc45a4	-0.10594	-1.7957	0.14907	0.50954	0.072549	0.64237
Chchd3	-0.10591	-1.8715	0.14929	0.50998	0.061278	0.63154
Rwdd4a	-0.10589	-2.0752	0.14938	0.51019	0.037967	0.61574
Ascl1	-0.10583	-2.0935	0.14971	0.51104	0.036305	0.61574
Nsfl1c	-0.10582	-1.4059	0.14975	0.51104	0.15976	0.69758
Tmcc2	-0.10576	-1.3199	0.14997	0.5114	0.18686	0.72007
Serpine2	-0.10575	-1.7908	0.15001	0.51142	0.073333	0.64237
Aifm3	-0.10573	-1.6667	0.15008	0.51142	0.095578	0.66405
Pik3ip1	-0.10572	-1.6158	0.15008	0.51142	0.10614	0.66672
Oog3	-0.10569	-1.8152	0.15019	0.5117	0.069488	0.63838
Eva1b	-0.10564	-1.0192	0.15034	0.51206	0.30809	0.78207
Pdzk1ip1	-0.10558	-1.6993	0.15059	0.51266	0.089261	0.6618
Armc3	-0.10557	-1.7489	0.15064	0.51274	0.080316	0.65063
Tcf12	-0.10556	-1.392	0.15071	0.51289	0.16393	0.70238
Atf6b	-0.10553	-1.9503	0.15094	0.51317	0.051139	0.61647
Trim39	-0.10553	-1.1854	0.15094	0.51317	0.23587	0.74737
Ostf1	-0.10542	-1.9719	0.15152	0.51455	0.048622	0.61574
Gm4301	-0.10531	-1.1984	0.15193	0.51498	0.23078	0.74517
Iffo2	-0.10531	-1.2137	0.15193	0.51498	0.22486	0.74218
Sh3bgrl3	-0.10531	-1.5402	0.15195	0.51498	0.12352	0.67661
Brwd1	-0.10508	-1.2581	0.15313	0.51686	0.20835	0.73081
Nr1h5	-0.10508	-1.5005	0.15316	0.51686	0.13349	0.67959
Pdzd2	-0.10507	-1.3756	0.15318	0.51686	0.16893	0.70679
Rbm12b2	-0.10506	-1.4086	0.15325	0.517	0.15895	0.69758
Runx2	-0.10503	-1.7605	0.15331	0.51706	0.078319	0.64973
Gja3	-0.10502	-1.8324	0.15336	0.51706	0.066886	0.63665
Spns2	-0.10502	-2.0973	0.15336	0.51706	0.035969	0.61574
Rhox7a	-0.105	-1.789	0.15347	0.51716	0.073613	0.64237
Micalcl	-0.10495	-1.647	0.1537	0.51751	0.09955	0.66445
Helz2	-0.10493	-1.581	0.15374	0.51751	0.11389	0.6729
2010111I01Rik	-0.10488	-1.7312	0.15405	0.51802	0.083416	0.65588
Klf4	-0.10484	-1.7359	0.15421	0.51827	0.082588	0.6545
Aox2	-0.10483	-1.6588	0.15422	0.51827	0.097153	0.66405
Kcnip2	-0.10476	-1.274	0.1546	0.5192	0.20265	0.72838
Glyr1	-0.10474	-1.5486	0.15469	0.51941	0.12147	0.67661
AA467197	-0.10471	-1.5778	0.15489	0.51975	0.11461	0.6729
Gmpr2	-0.10471	-1.6223	0.15489	0.51975	0.10474	0.66487
Boll	-0.10452	-1.4019	0.1558	0.52154	0.16095	0.69848
Athl1	-0.10451	-1.662	0.15586	0.52154	0.096522	0.66405
Capg	-0.1045	-0.88286	0.15598	0.52181	0.37731	0.81432
Il31ra	-0.10448	-2.0181	0.1561	0.52199	0.043581	0.61574
Sla	-0.10447	-1.6907	0.15614	0.52199	0.090886	0.6618
Arhgef9	-0.1044	-1.5772	0.15646	0.52289	0.11476	0.6729
Ndn	-0.10437	-1.8771	0.15658	0.52322	0.06051	0.6309
Nlrp14	-0.10436	-1.1181	0.15663	0.52322	0.26352	0.75802
Aox4	-0.10431	-2.824	0.15683	0.52381	0.0047424	0.36584
Ugt2a3	-0.10429	-1.587	0.15697	0.5241	0.11251	0.67171
Ripk4	-0.10425	-1.5081	0.15719	0.52432	0.13153	0.67959
H1fnt	-0.10424	-1.0294	0.15725	0.52432	0.30329	0.7793
Col6a6	-0.10423	-1.5348	0.15728	0.52432	0.12483	0.67661
Fam89a	-0.10423	-1.5924	0.15727	0.52432	0.1113	0.67109
Tfap2e	-0.10415	-1.6318	0.15754	0.52448	0.10271	0.66487
Myod1	-0.1041	-1.2874	0.15774	0.52471	0.19794	0.72713
Kif3c	-0.10409	-2.1999	0.15775	0.52471	0.027815	0.61153
Ear14	-0.10405	-1.7452	0.15796	0.5251	0.080944	0.65165
Gm15127	-0.10403	-0.97822	0.15807	0.52532	0.32797	0.79012
Cited2	-0.10402	-1.0229	0.15814	0.52537	0.30635	0.78119
Ebf1	-0.10397	-1.4063	0.15831	0.52561	0.15965	0.69758
Creb3	-0.10396	-1.7288	0.15835	0.52566	0.083848	0.65694
Flywch1	-0.10393	-1.6983	0.15851	0.52608	0.089458	0.6618
Rin1	-0.10389	-1.3954	0.1587	0.52621	0.16289	0.7013
Snta1	-0.10388	-1.6837	0.15874	0.52621	0.092244	0.66231
Zfp804b	-0.10388	-1.3761	0.15874	0.52621	0.1688	0.70679
Prdx1	-0.10383	-1.8305	0.15892	0.5264	0.067178	0.63689
Sbpl	-0.10381	-1.0901	0.159	0.52654	0.27569	0.76516
Shisa7	-0.10377	-2.404	0.1592	0.52676	0.016217	0.58216
Sumo2	-0.10375	-1.0092	0.15932	0.52699	0.31289	0.78358
Rassf1	-0.10372	-1.3691	0.15942	0.52699	0.17098	0.70679
Slc27a4	-0.10371	-1.4493	0.1595	0.52707	0.14726	0.6893
Hoxa2	-0.10368	-1.5782	0.15967	0.52726	0.11452	0.6729
Hcfc1r1	-0.10367	-1.282	0.15968	0.52726	0.19984	0.72768
Snw1	-0.10363	-0.85504	0.15979	0.52745	0.39253	0.81992
Hrct1	-0.10357	-1.6232	0.16003	0.5279	0.10455	0.66487
Irf5	-0.10357	-1.8522	0.16003	0.5279	0.063992	0.63355
Lekr1	-0.10349	-2.0387	0.16053	0.52889	0.041481	0.61574
Gabrg3	-0.10347	-1.5338	0.16068	0.52918	0.12509	0.67661
Pnmt	-0.10347	-2.0905	0.16066	0.52918	0.036569	0.61574
Nfe2l3	-0.10342	-1.5519	0.16098	0.52994	0.1207	0.67563
Mettl22	-0.10341	-1.9447	0.16113	0.53002	0.051812	0.61869
Rdh10	-0.10341	-1.2408	0.16112	0.53002	0.21468	0.73534
Dstn	-0.10338	-1.9804	0.16122	0.53014	0.047662	0.61574
Foxe3	-0.10335	-1.2297	0.16131	0.53019	0.21882	0.73962
Slc25a17	-0.10335	-1.6062	0.16128	0.53019	0.10824	0.66955
Nfib	-0.10334	-2.1947	0.16133	0.53019	0.028182	0.61153
Lmbrd2	-0.1033	-1.6568	0.16149	0.53044	0.09755	0.66405
Zc3h6	-0.10313	-1.3468	0.16226	0.53234	0.17804	0.71291
Tiam1	-0.10311	-2.0331	0.16235	0.53234	0.042037	0.61574
Colec10	-0.10307	-1.4043	0.16263	0.53291	0.16024	0.69786
Aaas	-0.10305	-0.98835	0.16268	0.53291	0.32298	0.78854
Tmf1	-0.10304	-1.7704	0.16273	0.53297	0.076654	0.64791
Tcf21	-0.10298	-1.4032	0.16296	0.53341	0.16056	0.69848
Atf3	-0.10285	-1.5527	0.1635	0.53435	0.12049	0.67563
Sema3c	-0.10284	-1.9526	0.16357	0.53435	0.050867	0.6164
Btd	-0.10283	-0.99654	0.16362	0.53435	0.31899	0.78625
Hsd3b5	-0.10282	-1.3988	0.16364	0.53435	0.16186	0.70017
Fgfr2	-0.10278	-1.602	0.16394	0.53496	0.10915	0.66981
Ankrd2	-0.10269	-1.3695	0.1644	0.53564	0.17084	0.70679
Bcl3	-0.10267	-2.1412	0.16451	0.53583	0.032256	0.61574
Il17rd	-0.10266	-1.6861	0.16455	0.53583	0.091785	0.66231
Slc7a4	-0.10263	-1.7541	0.16476	0.53621	0.079406	0.65045
Commd9	-0.10261	-1.6615	0.16484	0.53621	0.096618	0.66405
Olfr510	-0.1026	-1.7024	0.16488	0.53621	0.088681	0.6618
Tmem92	-0.10257	-1.8019	0.16511	0.53621	0.071568	0.63886
Aox1	-0.10256	-1.1589	0.16513	0.53621	0.24649	0.7504
Gpr37l1	-0.10255	-0.52561	0.16515	0.53621	0.59916	0.89451
Tnn	-0.10255	-2.0122	0.16515	0.53621	0.044199	0.61574
Fgl2	-0.10241	-1.3715	0.16576	0.53706	0.17022	0.70679
Shank1	-0.10239	-1.1659	0.1659	0.53717	0.24366	0.74929
Kctd12	-0.10232	-1.5575	0.16619	0.53777	0.11934	0.67563
Aldob	-0.10231	-1.6729	0.1663	0.53794	0.094348	0.66324
Prr5	-0.10231	-2.0136	0.1663	0.53794	0.04405	0.61574
Ccdc40	-0.10229	-0.93219	0.16634	0.53802	0.35124	0.80358
Pogz	-0.10226	-1.4443	0.16652	0.53824	0.14864	0.68996
Arsj	-0.10222	-1.1386	0.1669	0.5391	0.25487	0.75341
Noc4l	-0.10221	-0.34253	0.16696	0.5391	0.73195	0.93554
Dusp14	-0.10216	-0.41092	0.16711	0.5392	0.68113	0.92057
Fos	-0.10216	-0.99471	0.16713	0.5392	0.31988	0.78726
Dennd1c	-0.102	-1.5307	0.16793	0.54023	0.12584	0.67735
Pgm2	-0.10191	-1.6019	0.16827	0.54086	0.10918	0.66981
Ints5	-0.10187	-1.0059	0.1684	0.54104	0.31448	0.78379
Itgal	-0.10178	-1.1136	0.16897	0.54259	0.26546	0.7598
Notch2	-0.10175	-1.6432	0.16905	0.5427	0.10034	0.66445
Olfr739	-0.10171	-1.151	0.16927	0.54294	0.24975	0.75128
Cdt1	-0.1017	-0.53405	0.16932	0.54294	0.59331	0.89305
Abhd14a	-0.10169	-1.4872	0.16932	0.54294	0.13697	0.68155
Herc2	-0.10168	-1.3809	0.16935	0.54294	0.16731	0.70445
Kpna1	-0.10168	-1.402	0.16935	0.54294	0.16091	0.69848
Eml1	-0.10167	-1.3072	0.16941	0.54301	0.19113	0.72241
Prss3	-0.10164	-1.3019	0.16958	0.54337	0.19296	0.72347
Tbk1	-0.10163	-1.447	0.16966	0.54348	0.1479	0.6893
Mon1a	-0.10161	-1.2341	0.16977	0.54357	0.21717	0.73808
Prdx4	-0.10161	-1.0503	0.16973	0.54356	0.29359	0.77333
Tas2r110	-0.10149	-1.3156	0.17035	0.54475	0.18832	0.72092
Cep170b	-0.10144	-0.91497	0.17051	0.54518	0.36021	0.8071
N4bp1	-0.10144	-1.4656	0.17054	0.54518	0.14274	0.68505
Cabp2	-0.1014	-2.4069	0.17077	0.54532	0.016087	0.58216
Galnt6	-0.10133	-2.0644	0.17106	0.54616	0.03898	0.61574
Cox6a1	-0.10132	-1.8947	0.17116	0.54616	0.058133	0.62757
Ergic2	-0.10132	-0.88358	0.17115	0.54616	0.37692	0.81432
Olfr812	-0.10129	-1.9127	0.17128	0.54637	0.055784	0.62322
Kif1a	-0.10127	-1.5111	0.17134	0.54647	0.13077	0.67959
Col1a1	-0.10119	-2.0739	0.1718	0.54727	0.038085	0.61574
Shmt1	-0.10117	-1.3189	0.17192	0.54742	0.1872	0.72061
Slc44a3	-0.10115	-1.726	0.172	0.54753	0.084348	0.65928
4930415O20Rik	-0.10112	-1.5558	0.17213	0.54773	0.11975	0.67563
Alg11	-0.1011	-0.47542	0.17225	0.54793	0.63449	0.90586
C1ql1	-0.10107	-1.3242	0.17238	0.54797	0.18545	0.71903
Sh3bp2	-0.10107	-1.55	0.17235	0.54797	0.12113	0.67629
Abhd14b	-0.10101	-1.6355	0.17271	0.54851	0.10194	0.66487
Mark1	-0.10098	-2.1811	0.17283	0.54854	0.029174	0.61153
Wdfy3	-0.10098	-2.0289	0.17284	0.54854	0.042472	0.61574
Olfr1321	-0.10095	-1.5728	0.17299	0.54857	0.11576	0.6729
Znhit2	-0.10095	-0.44305	0.17301	0.54857	0.65773	0.91333
Osbpl11	-0.10083	-1.6609	0.1737	0.54933	0.096739	0.66405
Gvin1	-0.10081	-1.6782	0.17377	0.54947	0.093315	0.66247
Col4a2	-0.1008	-1.1893	0.17382	0.54947	0.23431	0.74652
Mrps36	-0.10076	-1.1188	0.17404	0.54973	0.26321	0.75798
D5Ertd577e	-0.10073	-1.0942	0.17418	0.54989	0.27387	0.76486
Ptp4a3	-0.10058	-1.354	0.17495	0.55162	0.17573	0.71047
Tnr	-0.10055	-1.3302	0.17518	0.55177	0.18345	0.71829
Nsd1	-0.10052	-2.0335	0.17535	0.55194	0.042005	0.61574
Ptpn20	-0.10048	-2.0972	0.17558	0.55226	0.035977	0.61574
Ppp2r5e	-0.10047	-1.3367	0.17565	0.55226	0.18132	0.71547
Mst1r	-0.10046	-1.6978	0.17569	0.55226	0.089554	0.6618
Tacr1	-0.10046	-1.1183	0.17569	0.55226	0.26343	0.758
Hs3st1	-0.10045	-1.5004	0.17582	0.5526	0.13352	0.67959
Phkg2	-0.10043	-1.6429	0.17589	0.55262	0.10041	0.66445
4930449I24Rik	-0.10042	-1.8069	0.17596	0.55263	0.070779	0.63838
Tmem63a	-0.10042	-1.5903	0.17591	0.55262	0.11177	0.67109
Nhlrc4	-0.10037	-2.1147	0.1763	0.55333	0.034458	0.61574
Glt28d2	-0.10031	-1.0716	0.17665	0.55392	0.2839	0.76893
Mical1	-0.10029	-1.3843	0.17678	0.55409	0.16626	0.70445
Ppp1r11	-0.10029	-0.56863	0.17674	0.55409	0.56961	0.887
Rbm43	-0.10026	-1.3749	0.17698	0.55439	0.16916	0.70679
Gm11596	-0.10019	-1.3135	0.17734	0.55496	0.18901	0.72097
Cd320	-0.10015	-2.3112	0.17751	0.55519	0.020823	0.59771
Tmed11	-0.10012	-0.95309	0.17767	0.5552	0.34054	0.79683
Slc4a1	-0.099972	-1.8026	0.17855	0.5567	0.071453	0.63838
Kbtbd2	-0.099969	-1.1199	0.17856	0.5567	0.26275	0.75792
Saraf	-0.099789	-1.5252	0.1794	0.55802	0.1272	0.67811
Prr3	-0.099774	-1.6727	0.17949	0.55802	0.094391	0.66324
Aldoart2	-0.099764	-2.7362	0.17952	0.55802	0.0062149	0.43407
Slc20a1	-0.099762	-1.3593	0.17952	0.55802	0.17404	0.70961
Car4	-0.099708	-3.0793	0.17975	0.55806	0.0020751	0.23834
Dleu7	-0.099691	-1.8532	0.17986	0.55807	0.063858	0.63355
Prr36	-0.09967	-1.4241	0.17996	0.55828	0.15442	0.69411
Gm3238	-0.099643	-1.2011	0.18012	0.55855	0.22973	0.7446
2010107E04Rik	-0.09963	-0.55165	0.18015	0.55855	0.58119	0.89167
Cspg5	-0.099601	-1.5964	0.18042	0.55855	0.11039	0.67109
Sez6l	-0.099596	-1.7544	0.18046	0.55859	0.079368	0.65045
Lipf	-0.099564	-1.647	0.18065	0.55902	0.099559	0.66445
Arsa	-0.09951	-1.7876	0.18095	0.55936	0.07384	0.64249
Nov	-0.099501	-1.3449	0.18099	0.5594	0.17865	0.713
Kcna2	-0.099477	-2.0701	0.18111	0.55967	0.038441	0.61574
B4galnt4	-0.099463	-2.0995	0.18119	0.55967	0.035775	0.61574
Pot1a	-0.099459	-1.7604	0.18121	0.55967	0.078348	0.64973
Col5a3	-0.099394	-1.8571	0.18147	0.5603	0.063291	0.63279
C4bp	-0.099342	-1.8619	0.18173	0.5605	0.062616	0.63231
Nap1l5	-0.099313	-1.7848	0.18187	0.56078	0.074298	0.6435
Arvcf	-0.099296	-1.4479	0.18198	0.56094	0.14765	0.6893
Depdc1a	-0.099264	-1.3929	0.18216	0.56121	0.16364	0.70198
Nudt10	-0.099136	-1.3461	0.18295	0.56277	0.17828	0.71291
Prkcsh	-0.09912	-2.0595	0.183	0.56281	0.039444	0.61574
Gbe1	-0.09909	-2.1184	0.18309	0.56294	0.034144	0.61574
Higd2a	-0.09898	-0.86467	0.18369	0.56431	0.38722	0.81813
Tmem14a	-0.098939	-1.1748	0.18387	0.56466	0.24008	0.74865
Tfeb	-0.098889	-1.3011	0.18415	0.56512	0.19323	0.7236
Dkk2	-0.098843	-1.4502	0.1844	0.56539	0.14701	0.6893
Galnt1	-0.098841	-1.3198	0.18441	0.56539	0.18689	0.72007
Syt7	-0.098807	-1.3677	0.1846	0.56562	0.1714	0.70679
Erich2	-0.098799	-0.64363	0.18464	0.56562	0.51982	0.86862
Dnah17	-0.098795	-1.4289	0.18465	0.56562	0.15303	0.6941
Fut1	-0.098784	-1.6696	0.18475	0.5657	0.095004	0.66394
Atp5j2	-0.098764	-1.1681	0.18491	0.56588	0.24279	0.74926
Scrn2	-0.098749	-1.3197	0.18497	0.56588	0.18692	0.72007
Mgat4a	-0.098658	-2.2777	0.18557	0.56718	0.022747	0.6009
Tnfaip6	-0.09865	-1.2918	0.18562	0.56727	0.19644	0.72702
Nsmce1	-0.098609	-0.90742	0.18578	0.56748	0.36418	0.80908
Rxrg	-0.098542	-1.3866	0.18613	0.568	0.16557	0.70445
P4ha3	-0.098525	-1.463	0.1862	0.568	0.14346	0.68589
Adamts14	-0.098512	-2.1218	0.1863	0.568	0.033851	0.61574
Ethe1	-0.098498	-1.6969	0.18642	0.56827	0.089716	0.6618
Ampd2	-0.098473	-1.3334	0.18653	0.56846	0.1824	0.71648
Usp54	-0.098398	-1.4984	0.18697	0.56914	0.13404	0.67959
Hdac5	-0.098395	-1.4581	0.18698	0.56914	0.14481	0.68756
Vmn1r11	-0.098381	-1.5162	0.18709	0.56927	0.12947	0.67959
Evi5l	-0.098355	-1.5872	0.18729	0.56964	0.11248	0.67168
Csgalnact1	-0.098316	-1.432	0.18756	0.57024	0.15214	0.6926
Tmco4	-0.098267	-1.3766	0.18789	0.57082	0.16864	0.70679
Gm2933	-0.098216	-0.56397	0.18812	0.57113	0.57278	0.88848
Actr3b	-0.098193	-1.2511	0.18827	0.57129	0.21089	0.73447
Dmtf1	-0.098176	-1.4349	0.18838	0.57139	0.15132	0.69204
Tmub1	-0.098165	-1.4148	0.18842	0.5714	0.15711	0.69632
Abhd10	-0.098153	-1.6203	0.18849	0.5714	0.10516	0.66487
Tas2r103	-0.098153	-0.64602	0.18849	0.5714	0.51826	0.86734
Mocs1	-0.098141	-1.9239	0.18853	0.5714	0.054365	0.62133
Tead1	-0.09812	-1.3414	0.18863	0.5714	0.17981	0.71488
Specc1l	-0.098087	-1.002	0.18878	0.57162	0.31636	0.78495
Tulp1	-0.098044	-1.5741	0.18907	0.57221	0.11547	0.6729
Mcee	-0.098024	-1.3507	0.18913	0.57231	0.1768	0.71235
Mon1b	-0.098018	-1.0658	0.18917	0.57237	0.28652	0.76919
Cd46	-0.098011	-1.9156	0.18922	0.57243	0.055416	0.62226
Ppp4r4	-0.097987	-2.1177	0.18936	0.57267	0.034199	0.61574
Adnp2	-0.097978	-1.6437	0.18943	0.5728	0.10023	0.66445
Avpr1a	-0.09793	-1.3084	0.18974	0.5734	0.19075	0.72241
Creb3l3	-0.097918	-1.6951	0.18978	0.57344	0.09006	0.6618
Cd200r3	-0.097914	-1.2405	0.18982	0.57344	0.21481	0.73534
Cops7b	-0.097885	-1.8182	0.1899	0.57347	0.069039	0.63838
Zfp119a	-0.097871	-1.4216	0.19001	0.57369	0.15514	0.69552
Plekha4	-0.09786	-1.5272	0.19005	0.57369	0.12671	0.67811
D8Ertd82e	-0.097801	-1.8315	0.19036	0.57412	0.067029	0.63689
Ube2l3	-0.097754	-0.4601	0.19065	0.57466	0.64545	0.9095
Cd5	-0.097739	-1.3507	0.19077	0.57493	0.17678	0.71235
Gsto1	-0.097736	-0.88882	0.19081	0.57496	0.3741	0.81318
Gdf9	-0.097716	-0.42778	0.1909	0.57505	0.66881	0.9159
Tmub2	-0.097697	-1.6662	0.19099	0.57518	0.095665	0.66405
Hs3st4	-0.097683	-0.96698	0.19107	0.57528	0.33355	0.79336
Ugt1a1	-0.097672	-1.516	0.19111	0.57528	0.12953	0.67959
Yipf6	-0.097648	-1.551	0.19121	0.57546	0.1209	0.67585
Pwwp2b	-0.097627	-1.8116	0.1913	0.57546	0.070043	0.63838
Sprn	-0.097539	-1.7578	0.19169	0.57581	0.078786	0.65015
Il1rl1	-0.097537	-1.4665	0.19171	0.57581	0.14251	0.68505
Nmral1	-0.097537	-1.1718	0.19171	0.57581	0.24128	0.74926
Mesp2	-0.097458	-2.201	0.19204	0.57623	0.027736	0.61153
Ncstn	-0.097441	-1.3088	0.1921	0.57623	0.19061	0.72241
Exog	-0.097439	-1.2388	0.1921	0.57623	0.21541	0.73577
Slc16a7	-0.097375	-1.1398	0.19252	0.57676	0.25439	0.75293
Aes	-0.097365	-1.6215	0.19259	0.57688	0.1049	0.66487
Pdcd10	-0.097299	-1.2253	0.19302	0.57762	0.22046	0.73962
Rttn	-0.097274	-1.9262	0.19313	0.5778	0.054081	0.62133
Tacc1	-0.097263	-2.1792	0.19319	0.57784	0.029314	0.61153
Lhb	-0.097222	-1.4277	0.19348	0.5782	0.15339	0.69411
Tctex1d2	-0.097215	-1.4496	0.19348	0.5782	0.14718	0.6893
Slc16a8	-0.097151	-1.6649	0.19381	0.57891	0.095941	0.66405
Uck2	-0.097097	-1.6862	0.19412	0.57915	0.091762	0.66231
Fer1l5	-0.097063	-2.0046	0.19427	0.57915	0.045005	0.61574
Ptpro	-0.097009	-2.1857	0.19443	0.5795	0.028836	0.61153
Tpm3	-0.096998	-1.1499	0.19448	0.5795	0.25019	0.75128
Prl7a1	-0.096957	-1.4325	0.19475	0.57987	0.15199	0.6926
Gnrh1	-0.096937	-1.5517	0.19482	0.57987	0.12073	0.67563
Olfr131	-0.096913	-1.7446	0.1949	0.58002	0.081056	0.65179
Slc12a2	-0.096805	-1.5015	0.19555	0.58161	0.13324	0.67959
Them6	-0.096757	-1.6121	0.19591	0.58218	0.10695	0.66809
Pclo	-0.096727	-1.2726	0.19606	0.58239	0.20316	0.72838
Rag1	-0.096723	-1.1316	0.19609	0.58239	0.25779	0.7557
Dlgap4	-0.096605	-1.7911	0.19679	0.58337	0.073283	0.64237
Prh1	-0.096573	-1.2127	0.19692	0.5836	0.22524	0.74224
Tmem211	-0.09655	-1.2103	0.197	0.58366	0.22617	0.74282
Flrt3	-0.096428	-0.71969	0.19761	0.58466	0.47172	0.85165
Nme3	-0.096371	-1.4204	0.19799	0.58514	0.15548	0.69552
Phyhip	-0.096359	-1.1518	0.19807	0.58514	0.2494	0.75128
Sema6b	-0.09632	-1.4782	0.19825	0.58543	0.13935	0.6825
Fam71d	-0.096295	-2.0073	0.19836	0.58558	0.044719	0.61574
Dnase2b	-0.096274	-1.5592	0.19845	0.5857	0.11895	0.67563
Olfr829	-0.09626	-1.7143	0.19854	0.58579	0.086472	0.6618
Fbxw26	-0.096238	-1.7002	0.19864	0.5859	0.089086	0.6618
Rsph3a	-0.096216	-1.4949	0.19874	0.58603	0.13493	0.67959
Tob2	-0.096212	-1.0981	0.19878	0.58603	0.27215	0.76373
Gm14137	-0.096205	-1.3278	0.19882	0.58603	0.18424	0.71854
Atp6v0e2	-0.0962	-1.7702	0.19883	0.58603	0.076694	0.64791
[truncated: 17,676 more rows]

## Sheet: Table 2
Supplementary Table 2. GO pathway analysis of top candidate genes from FTS screen.
Term	Overlap	P-value	Adjusted P-value	Odds Ratio	Combined Score	Genes
mitochondrial ATP synthesis coupled electron transport (GO:0042775)	44/85	2.01354e-48	1.02751e-44	21.215	2329.93	NDUFB9;COX7B;NDUFA13;NDUFB8;NDUFB7;NDUFA11;NDUFB6;NDUFB10;UQCRB;NDUFB11;NDUFB5;NDUFB4;NDUFA10;NDUFB3;NDUFB2;UQCR11;UQCR10;COX5B;UQCRFS1;CYC1;NDUFV2;NDUFA8;NDUFA6;NDUFA5;NDUFA3;NDUFA2;NDUFA1;NDUFC2;NDUFC1;SDHC;SDHD;SDHA;COX6C;COX6B1;NDUFS8;NDUFS7;NDUFS6;UQCRQ;NDUFS5;NDUFS3;UQCRC1;NDUFS2;NDUFS1;NDUFAF1
respiratory electron transport chain (GO:0022904)	45/94	1.77544e-47	4.53005e-44	19.6198	2112.02	NDUFB9;COX7B;NDUFA13;NDUFB8;NDUFB7;NDUFA11;NDUFB6;NDUFB10;UQCRB;NDUFB11;NDUFB5;NDUFB4;NDUFA10;NDUFB3;NDUFB2;UQCR11;UQCR10;COX5B;UQCRFS1;CYC1;NDUFV2;NDUFA8;NDUFA6;NDUFA5;NDUFA3;NDUFA2;NDUFA1;NDUFC2;NDUFC1;SDHC;SDHD;SDHA;COX6C;SDHB;COX6B1;NDUFS8;NDUFS7;NDUFS6;UQCRQ;NDUFS5;NDUFS3;UQCRC1;NDUFS2;NDUFS1;NDUFAF1
NADH dehydrogenase complex assembly (GO:0010257)	39/64	6.40859e-47	1.0901e-43	24.9744	2656.37	NDUFB9;NDUFA13;NDUFB8;NDUFB7;NDUFA11;NDUFB6;NDUFB10;NDUFB11;NDUFB5;NDUFB4;NDUFA10;NDUFB3;NDUFB2;ECSIT;FOXRED1;NDUFV2;NDUFA8;TIMMDC1;NDUFA6;NDUFA5;NDUFA3;ACAD9;NDUFA2;NDUFA1;NDUFC2;NDUFC1;NDUFS8;NDUFS7;NDUFS6;NDUFAF7;NDUFS5;NDUFAF4;NDUFAF5;NDUFS3;NDUFAF2;NDUFS2;NDUFS1;TMEM126B;NDUFAF1
mitochondrial respiratory chain complex I biogenesis (GO:0097031)	39/64	6.40859e-47	8.17576e-44	24.9744	2656.37	NDUFB9;NDUFA13;NDUFB8;NDUFB7;NDUFA11;NDUFB6;NDUFB10;NDUFB11;NDUFB5;NDUFB4;NDUFA10;NDUFB3;NDUFB2;ECSIT;FOXRED1;NDUFV2;NDUFA8;TIMMDC1;NDUFA6;NDUFA5;NDUFA3;ACAD9;NDUFA2;NDUFA1;NDUFC2;NDUFC1;NDUFS8;NDUFS7;NDUFS6;NDUFAF7;NDUFS5;NDUFAF4;NDUFAF5;NDUFS3;NDUFAF2;NDUFS2;NDUFS1;TMEM126B;NDUFAF1
mitochondrial respiratory chain complex I assembly (GO:0032981)	39/64	6.40859e-47	6.54061e-44	24.9744	2656.37	NDUFB9;NDUFA13;NDUFB8;NDUFB7;NDUFA11;NDUFB6;NDUFB10;NDUFB11;NDUFB5;NDUFB4;NDUFA10;NDUFB3;NDUFB2;ECSIT;FOXRED1;NDUFV2;NDUFA8;TIMMDC1;NDUFA6;NDUFA5;NDUFA3;ACAD9;NDUFA2;NDUFA1;NDUFC2;NDUFC1;NDUFS8;NDUFS7;NDUFS6;NDUFAF7;NDUFS5;NDUFAF4;NDUFAF5;NDUFS3;NDUFAF2;NDUFS2;NDUFS1;TMEM126B;NDUFAF1
mitochondrial respiratory chain complex assembly (GO:0033108)	42/97	5.03938e-42	4.28599e-39	17.7455	1687.44	NDUFB9;NDUFA13;NDUFB8;NDUFB7;NDUFA11;NDUFB10;UQCRB;NDUFB6;NDUFB11;NDUFB5;NDUFB4;NDUFA10;COX17;NDUFB3;NDUFB2;UQCR10;ECSIT;FOXRED1;NDUFV2;NDUFA8;TIMMDC1;NDUFA6;NDUFA5;NDUFA3;ACAD9;NDUFA2;NDUFA1;NDUFC2;NDUFC1;NDUFS8;NDUFS7;NDUFAF7;NDUFS6;NDUFAF4;NDUFS5;NDUFAF5;NDUFAF2;NDUFS3;NDUFS2;NDUFS1;TMEM126B;NDUFAF1
mitochondrial electron transport, NADH to ubiquinone (GO:0006120)	30/46	1.18788e-37	8.65966e-35	26.7284	2272.54	NDUFB9;NDUFB8;NDUFA13;NDUFB7;NDUFB6;NDUFB10;NDUFA11;NDUFB11;NDUFB5;NDUFB4;NDUFA10;NDUFB3;NDUFB2;NDUFV2;NDUFA8;NDUFA6;NDUFA5;NDUFA3;NDUFA2;NDUFA1;NDUFC2;NDUFC1;NDUFS8;NDUFS7;NDUFS6;NDUFS5;NDUFS3;NDUFS2;NDUFS1;NDUFAF1
proteasome-mediated ubiquitin-dependent protein catabolic process (GO:0043161)	28/291	7.23946e-10	4.61787e-07	3.94344	82.9948	CUL3;FAF2;SEL1L;DERL2;UBR2;AUP1;RNF7;UBE2J1;ANAPC11;ARNTL;CDC23;PCBP2;SPOP;ANAPC7;SYVN1;UBE4B;UBE2G2;KCTD5;KLHL42;KLHL20;DDB1;RNF145;PSMC3;KCTD10;STUB1;RNF185;DZIP3;MAD2L1
cellular respiration (GO:0045333)	12/57	1.01609e-08	5.76123e-06	8.62813	158.798	FASTKD1;NDUFS7;UQCRB;NDUFS3;UQCRC1;NDUFAF2;SDHC;NDUFS1;UQCR10;SDHA;NDUFV2;SDHB
ubiquitin-dependent ERAD pathway (GO:0030433)	12/58	1.25312e-08	6.39467e-06	8.47937	154.282	PSMC3;FAF2;SEL1L;EDEM2;SYVN1;DERL2;UBE4B;AUP1;UBE2G2;RNF185;DZIP3;UBE2J1
mitochondrial electron transport, ubiquinol to cytochrome c (GO:0006122)	7/14	1.45972e-08	6.77178e-06	20.4918	369.722	UQCRB;UQCRQ;UQCRC1;UQCRFS1;UQCR11;UQCR10;CYC1
protein N-linked glycosylation (GO:0006487)	13/73	2.10561e-08	8.95409e-06	7.29845	129.008	OST4;ALG8;ALG5;PMM2;SYVN1;ALG12;UBE2G2;UBE2J1;DPM1;DPM2;DAD1;MGAT1;MGAT2
negative regulation of TOR signaling (GO:0032007)	10/40	2.99907e-08	1.17725e-05	10.2459	177.483	SZT2;NPRL2;NPRL3;AKT1S1;TSC2;UBR2;TSC1;DEPDC5;ITFG2;ARNTL
protein exit from endoplasmic reticulum (GO:0032527)	7/19	1.9275e-07	7.02575e-05	15.0992	233.462	CTAGE5;SEL1L;FAF2;SYVN1;DERL2;PREB;AUP1
proteasomal protein catabolic process (GO:0010498)	21/237	3.98122e-07	0.000135441	3.63146	53.515	ANAPC7;CUL3;SEL1L;SYVN1;KEAP1;UBE4B;KCTD5;ANAPC11;ARNTL;KLHL42;KLHL20;DDB1;RNF145;CDC23;PSMC3;KCTD10;PCBP2;SPOP;STUB1;RNF185;MAD2L1
oligosaccharide-lipid intermediate biosynthetic process (GO:0006490)	6/14	5.20397e-07	0.000165974	17.5644	254.134	ALG8;ALG9;ALG3;ALG12;ALG1;MPDU1
ubiquitin-dependent protein catabolic process (GO:0006511)	25/341	1.14713e-06	0.000344342	3.00466	41.0985	CUL5;CUL3;PTPN23;RNF7;ANAPC11;ARNTL;CDC23;PCBP2;ARIH2;SPOP;ARIH1;ANAPC7;SYVN1;UBE4B;UBE2G2;KCTD5;KLHL42;KLHL20;DDB1;RNF145;PSMC3;KCTD10;STUB1;RNF185;MAD2L1
ERAD pathway (GO:0036503)	11/77	2.55035e-06	0.000723025	5.8548	75.4056	PSMC3;FAF2;SEL1L;SYVN1;DERL2;UBE4B;AUP1;UBE2G2;RNF185;DZIP3;UBE2J1
protein ubiquitination (GO:0016567)	31/506	2.85513e-06	0.000766826	2.51085	32.0545	CBFB;CUL5;CUL3;HIST1H2BK;KEAP1;UBR2;RNF7;HIF1A;ANAPC11;SPOP;ARIH2;ARIH1;BRAP;SYVN1;PEX10;UBE4B;UBE2G2;MARCH5;KLHL42;KLHL20;DDB1;RNF145;PSMC3;KCTD10;PEX5;BCL2;UBE2N;STUB1;CCDC22;RNF185;DZIP3
dolichol-linked oligosaccharide biosynthetic process (GO:0006488)	6/18	2.96026e-06	0.000755309	13.6612	173.91	ALG8;ALG9;ALG3;ALG12;ALG1;MPDU1
protein glycosylation (GO:0006486)	14/130	3.63057e-06	0.000882228	4.41362	55.2855	ALG8;COG7;ALG5;PMM2;ALG3;ALG12;SIRT6;ALG1;DPM1;DAD1;B3GNT2;MGAT1;MGAT2;ALG10B
endosomal transport (GO:0016197)	19/229	3.76601e-06	0.000873544	3.40039	42.4691	VPS29;VPS18;MON2;SYS1;VPS33A;GBF1;PIK3R4;PTPN23;KLHL20;VPS51;SNX17;HGS;VPS52;VPS11;VPS35;PIK3C3;TBC1D10B;VPS16;CHMP5
regulation of TOR signaling (GO:0032006)	10/67	4.86683e-06	0.0010798	6.11696	74.8291	DGKQ;NPRL2;AKT1S1;NPRL3;TSC2;TSC1;UBR2;RICTOR;DEPDC5;ARNTL
regulation of retrograde protein transport, ER to cytosol (GO:1904152)	5/12	5.82392e-06	0.00123831	17.0765	205.832	BCAP31;EDEM2;DERL2;UBE2G2;UBE2J1
protein modification by small protein conjugation (GO:0032446)	26/398	5.86827e-06	0.00119783	2.67732	32.2509	CUL3;HIST1H2BK;DCUN1D1;KEAP1;UBR2;RNF7;HIF1A;ANAPC11;ARIH2;ARIH1;BRAP;UBE2F;NUP133;SYVN1;PEX10;UBE2G2;KLHL42;KLHL20;SENP1;DDB1;KCTD10;PEX5;UBE2N;STUB1;CCDC22;UBE2M
protein N-linked glycosylation via asparagine (GO:0018279)	8/44	9.71268e-06	0.0019063	7.45156	86.0065	DPM1;OST4;DPM2;DAD1;ALG5;SYVN1;UBE2G2;UBE2J1
peptidyl-asparagine modification (GO:0018196)	8/45	1.15629e-05	0.00218538	7.28597	82.8249	DPM1;OST4;DPM2;DAD1;ALG5;SYVN1;UBE2G2;UBE2J1
negative regulation of intrinsic apoptotic signaling pathway (GO:2001243)	9/62	1.83219e-05	0.00333916	5.94923	64.8908	DNAJA1;NDUFA13;OPA1;NDUFS3;SYVN1;BCL2;SOD2;MCL1;BCL2L1
RNA splicing, via transesterification reactions with bulged adenosine as nucleophile (GO:0000377)	18/236	2.13202e-05	0.00375161	3.12587	33.6214	DBR1;GPKOW;FUS;CPSF2;SRSF1;CASC3;DDX41;PNN;LSM7;SFPQ;POLR2A;PUF60;PCBP2;NAA38;SRSF5;SNRNP35;SRSF11;SNRPB
protein polyubiquitination (GO:0000209)	20/283	2.2911e-05	0.00389715	2.89637	30.9445	ANAPC7;CBFB;CUL3;SYVN1;UBE4B;UBR2;UBE2G2;MARCH5;ANAPC11;KLHL42;KLHL20;RNF145;CDC23;PSMC3;ARIH2;UBE2N;BCL2;STUB1;ARIH1;DZIP3
regulation of telomere maintenance (GO:0032204)	6/25	2.44233e-05	0.00402039	9.83607	104.459	UPF1;SMG1;DHX36;ATRX;SIRT6;SMG6
endoplasmic reticulum to cytosol transport (GO:1903513)	5/16	2.96225e-05	0.00472387	12.8074	133.542	SEL1L;FAF2;SYVN1;DERL2;AUP1
negative regulation of intracellular signal transduction (GO:1902532)	14/161	4.21163e-05	0.00651271	3.56379	35.9055	NDUFA13;NPRL2;NPRL3;TSC2;TSC1;UBR2;ARNTL;AKT1S1;BCL2;NDUFS3;CCDC22;DEPDC5;MCL1;BCL2L1
regulation of cellular response to stress (GO:0080135)	11/104	4.7152e-05	0.00707696	4.3348	43.1839	CREBBP;SMG1;HSP90AB1;NUP133;PTGES3;CHORDC1;AKT1S1;RPA1;MCL1;ARNTL;MAPK3
aerobic respiration (GO:0009060)	6/28	4.88263e-05	0.00711887	8.7822	87.183	UQCRB;NDUFS7;UQCRC1;SDHC;UQCR10;SDHB
retrograde protein transport, ER to cytosol (GO:0030970)	5/18	5.5805e-05	0.00791036	11.3843	111.494	SEL1L;FAF2;SYVN1;DERL2;AUP1
glycoprotein biosynthetic process (GO:0009101)	9/72	6.19711e-05	0.00854698	5.12295	49.6355	COG7;DAD1;ALG5;PMM2;ALG3;B3GNT2;MGAT1;ALG1;ALG10B
mRNA processing (GO:0006397)	19/283	7.29031e-05	0.00979012	2.75155	26.2123	DBR1;GPKOW;FUS;CPSF2;SRSF1;CASC3;DDX41;PNN;LSM7;SFPQ;POLR2A;PUF60;SARNP;PCBP2;NAA38;SRSF5;SNRNP35;SRSF11;SNRPB
fatty-acyl-CoA biosynthetic process (GO:0046949)	6/30	7.38364e-05	0.00966121	8.19672	77.9808	SLC25A1;ACSL4;HSD17B12;ACSL3;PPT2;ACACA
endoplasmic reticulum mannose trimming (GO:1904380)	5/19	7.42221e-05	0.00946888	10.7852	102.55	EDEM2;SEL1L;SYVN1;DERL2;RNF185
post-Golgi vesicle-mediated transport (GO:0006892)	8/58	7.79153e-05	0.00969761	5.65291	53.4759	ARF1;MON2;SYS1;VPS52;GBF1;CCDC22;CCDC93;KLHL20
mRNA splicing, via spliceosome (GO:0000398)	18/261	7.97326e-05	0.00968751	2.82646	26.6728	DBR1;GPKOW;FUS;CPSF2;SRSF1;CASC3;DDX41;PNN;LSM7;SFPQ;POLR2A;PUF60;PCBP2;NAA38;SRSF5;SNRNP35;SRSF11;SNRPB
regulation of cellular response to heat (GO:1900034)	9/78	0.000116707	0.0138502	4.72888	42.824	CREBBP;HSP90AB1;NUP133;PTGES3;CHORDC1;AKT1S1;RPA1;IER5;MAPK3
Golgi vesicle transport (GO:0048193)	18/271	0.00012837	0.014888	2.72216	24.3922	BCAP31;ARF1;COG7;TMED10;COG6;COG5;CUL3;GBF1;KIF23;DYNLL1;KLC1;TFG;CTAGE5;VPS51;TMED2;PREB;SEC22B;SEC31A
ER to Golgi vesicle-mediated transport (GO:0006888)	14/180	0.000140505	0.0159333	3.18761	28.275	BCAP31;COG7;TMED10;COG6;COG5;CUL3;GBF1;DYNLL1;TFG;CTAGE5;TMED2;PREB;SEC22B;SEC31A
vesicle coating (GO:0006901)	8/63	0.000141536	0.0157013	5.20427	46.1252	PPP6C;TMED10;TFG;CUL3;TMED2;PREB;SEC22B;SEC31A
COPII vesicle coating (GO:0048208)	8/63	0.000141536	0.0153672	5.20427	46.1252	PPP6C;TMED10;TFG;CUL3;TMED2;PREB;SEC22B;SEC31A
vesicle targeting, rough ER to cis-Golgi (GO:0048207)	8/63	0.000141536	0.0150471	5.20427	46.1252	PPP6C;TMED10;TFG;CUL3;TMED2;PREB;SEC22B;SEC31A
cytosolic transport (GO:0016482)	11/118	0.000149051	0.0155226	3.82051	33.6633	VPS29;MON2;SYS1;VPS51;VPS52;GBF1;VPS35;PIK3C3;PTPN23;TBC1D10B;KLHL20
RNA export from nucleus (GO:0006405)	11/119	0.000160693	0.0164004	3.7884	33.0955	UPF1;SMG1;NUP133;SARNP;CPSF2;SRSF1;TSC1;CASC3;SRSF5;SRSF11;SMG6
mRNA-containing ribonucleoprotein complex export from nucleus (GO:0071427)	10/100	0.000165942	0.016604	4.09836	35.6716	UPF1;SMG1;NUP133;SARNP;CPSF2;SRSF1;CASC3;SRSF5;SRSF11;SMG6
gene expression (GO:0010467)	23/411	0.000209854	0.020594	2.29349	19.4238	UPF1;ISCA2;RBM39;SMG1;RPS9;NUP133;SRSF1;CPSF2;MRPS18A;ASH2L;CASC3;MRPL23;SMG6;MRPL44;SETX;LSM7;POLR2A;SARNP;AGO2;DHX36;STUB1;SRSF5;SRSF11
regulation of triglyceride biosynthetic process (GO:0010866)	4/13	0.000210108	0.0202298	12.6103	106.783	SREBF1;NR1H2;CNEP1R1;FITM2
protein neddylation (GO:0045116)	4/13	0.000210108	0.0198552	12.6103	106.783	UBE2F;DCUN1D1;RNF7;UBE2M
mRNA transport (GO:0051028)	10/104	0.000229474	0.021291	3.94073	33.0222	UPF1;SMG1;NUP133;SARNP;CPSF2;SRSF1;CASC3;SRSF5;SRSF11;SMG6
cellular protein modification process (GO:0006464)	43/1001	0.000240686	0.0219325	1.76053	14.6688	LIPT1;CUL5;CUL3;DCUN1D1;PIK3R4;KEAP1;ILK;RNF7;HIF1A;PPP1CB;PPP6C;DUSP10;ERBB2;MGAT1;PAK2;MAPK3;UBE2F;MORC3;COG7;WSB2;PMM2;ALG5;DYRK1A;ALG3;ALG1;CLK3;KLHL42;KLHL20;DDB1;PSMC3;CDK5;DAD1;WNK3;UBE2N;ASB6;B3GNT2;PIK3C3;CCDC22;ALG10B;BAP1;BMPR1A;FGFR1;UBE2M
COPII-coated vesicle budding (GO:0090114)	8/68	0.000242912	0.021747	4.8216	40.1293	PPP6C;TMED10;TFG;CUL3;TMED2;PREB;SEC22B;SEC31A
protein alpha-1,2-demannosylation (GO:0036508)	5/24	0.000245305	0.0215826	8.53825	70.9785	EDEM2;SEL1L;SYVN1;DERL2;RNF185
translational elongation (GO:0006414)	10/105	0.000248205	0.0214676	3.9032	32.4015	EEFSEC;EEF1G;MRPL40;MRPS25;MRPS18A;MRPL17;MRPL23;MRPL45;CHCHD1;MRPL44
mRNA export from nucleus (GO:0006406)	10/105	0.000248205	0.0211098	3.9032	32.4015	UPF1;SMG1;NUP133;SARNP;CPSF2;SRSF1;CASC3;SRSF5;SRSF11;SMG6
DNA-templated transcription, termination (GO:0006353)	10/106	0.000268199	0.0224364	3.86638	31.7962	SETX;POLR2A;SARNP;CPSF2;SRSF1;UBTF;CASC3;SRSF5;SRSF11;SNRPB
COPI coating of Golgi vesicle (GO:0048205)	3/6	0.00027333	0.0224968	20.4918	168.132	TMED10;GBF1;TMED2
Golgi transport vesicle coating (GO:0048200)	3/6	0.00027333	0.0221397	20.4918	168.132	TMED10;GBF1;TMED2
protein localization to endoplasmic reticulum exit site (GO:0070973)	3/6	0.00027333	0.0217938	20.4918	168.132	BCAP31;CTAGE5;GBF1
COPI-coated vesicle budding (GO:0035964)	3/6	0.00027333	0.0214585	20.4918	168.132	TMED10;GBF1;TMED2
protein ubiquitination involved in ubiquitin-dependent protein catabolic process (GO:0042787)	8/70	0.000297327	0.0229888	4.68384	38.036	CUL5;CUL3;ARIH2;SPOP;ARIH1;RNF7;RNF185;ANAPC11
cellular response to amino acid starvation (GO:0034198)	6/39	0.000336963	0.0256645	6.30517	50.4132	SZT2;NPRL2;NPRL3;DEPDC5;ITFG2;MAPK3
lysosomal transport (GO:0007041)	8/72	0.000361307	0.027114	4.55373	36.0919	VPS18;VPS51;HGS;VPS33A;VPS52;VPS11;VPS35;VPS16
protein targeting to peroxisome (GO:0006625)	4/15	0.000385848	0.028536	10.929	85.9024	PEX3;PEX5;PEX10;PEX1
mitochondrial transport (GO:0006839)	11/135	0.000481645	0.0351119	3.3394	25.5074	SLC25A1;NDUFB8;SLC25A19;BCL2;TSPO;TIMM23;VPS35;CYC1;ATP5O;COX5B;BCL2L1
vesicle-mediated transport (GO:0016192)	22/410	0.000507209	0.0364547	2.19912	16.6838	VPS29;VPS18;TMED10;VPS33A;GBF1;PIK3R4;CCZ1;TSC2;PTPN23;CDC42;CTAGE5;CDK5;VPS51;VPS52;VPS11;TMED2;VPS35;PIK3C3;SEC22B;VPS16;TBC1D10B;CHMP5
regulation of cytokinesis (GO:0032465)	8/77	0.000571329	0.040493	4.25804	31.7971	CDC42;AHCTF1;CUL3;PIK3R4;KIF23;PIK3C3;E2F8;BCL2L1
protein transmembrane import into intracellular organelle (GO:0044743)	6/43	0.000579913	0.0405383	5.71864	42.6189	NDUFA13;PEX3;PEX5;TIMM23;PEX10;PEX1
positive regulation of protein modification process (GO:0031401)	12/163	0.000677942	0.0467505	3.0172	22.0148	ANKLE2;DAXX;CNEP1R1;CHORDC1;ERBB2;DYRK1A;UBE2N;ILK;ALG10B;EGFR;ARNTL;MAPK3
protein lipoylation (GO:0009249)	3/8	0.000737854	0.0502036	15.3689	110.837	LIPT2;LIPT1;LIAS
negative regulation of retrograde protein transport, ER to cytosol (GO:1904153)	3/8	0.000737854	0.049543	15.3689	110.837	DERL2;UBE2G2;UBE2J1
protein complex assembly (GO:0006461)	13/189	0.000780289	0.0517118	2.81898	20.1722	KMT2D;CREBBP;TMED10;CUL3;ASH2L;AFG3L2;PPP6C;TFG;OPA1;TMED2;PREB;SEC22B;SEC31A
vesicle-mediated transport to the plasma membrane (GO:0098876)	5/31	0.000852053	0.0557439	6.61026	46.7204	VPS29;SNX17;VPS35;CCDC22;CCDC93
RNA metabolic process (GO:0016070)	13/191	0.000860258	0.0555683	2.78946	19.6888	RBM39;FASTKD1;LSM1;CASC3;DDX41;LRPPRC;MRPL44;SETX;LSM7;POLR2A;DHX36;PCBP2;AGO2
DNA damage response, signal transduction by p53 class mediator (GO:0030330)	8/82	0.000870573	0.0555317	3.9984	28.1742	PAXIP1;TFAP4;CNOT11;CNOT1;CNOT2;ATRX;CNOT10;E2F8
regulation of intrinsic apoptotic signaling pathway (GO:2001242)	6/47	0.000940872	0.0592749	5.23195	36.4599	BCAP31;NDUFA13;BCL2;NDUFS3;MCL1;BCL2L1
protein maturation (GO:0051604)	8/83	0.000943282	0.058702	3.95023	27.5179	LIPT2;ISCA2;AFG3L2;LIPT1;ISCA1;UQCRC1;STUB1;LIAS
negative regulation of apoptotic signaling pathway (GO:2001234)	7/65	0.00101205	0.0622225	4.41362	30.4354	NDUFA13;OPA1;NDUFS3;BCL2;CFLAR;MCL1;BCL2L1
positive regulation of chromosome organization (GO:2001252)	4/19	0.00101402	0.0616017	8.62813	59.4809	RAD21;ATRX;DHX36;SIRT6
fatty-acyl-CoA metabolic process (GO:0035337)	4/19	0.00101402	0.0608769	8.62813	59.4809	SLC25A1;HSD17B4;PPT2;ACACA
aspartate family amino acid catabolic process (GO:0009068)	4/19	0.00101402	0.0601691	8.62813	59.4809	GOT2;OGDH;DLST;DLD
positive regulation of triglyceride biosynthetic process (GO:0010867)	3/9	0.00108677	0.0637448	13.6612	93.2315	SREBF1;CNEP1R1;NR1H2
regulation of SNARE complex assembly (GO:0035542)	3/9	0.00108677	0.0630204	13.6612	93.2315	VPS18;VPS11;VPS16
negative regulation of protein exit from endoplasmic reticulum (GO:0070862)	3/9	0.00108677	0.0623123	13.6612	93.2315	DERL2;UBE2G2;UBE2J1
nuclear-transcribed mRNA catabolic process (GO:0000956)	12/174	0.00119975	0.0680258	2.82646	19.0097	UPF1;RPS9;SMG1;CNOT11;CNOT1;CNOT2;LSM1;CNOT10;SMG9;CASC3;SMG8;SMG6
cellular response to starvation (GO:0009267)	9/107	0.00123325	0.069157	3.44722	23.0898	SREBF1;SZT2;NPRL2;NPRL3;PIK3R4;PIK3C3;DEPDC5;ITFG2;MAPK3
positive regulation of cell cycle process (GO:0090068)	9/107	0.00123325	0.0684053	3.44722	23.0898	CDC42;DMRT1;CUL3;RAD21;ATRX;KIF23;NDC80;E2F8;MAD2L1
Golgi to endosome transport (GO:0006895)	4/20	0.00124328	0.0682199	8.19672	54.8361	MON2;SYS1;GBF1;KLHL20
error-prone translesion synthesis (GO:0042276)	4/20	0.00124328	0.0674941	8.19672	54.8361	RFC3;RFC4;POLE2;RPA1
mitochondrial translational elongation (GO:0070125)	8/87	0.00128421	0.0689826	3.76861	25.0899	MRPL40;MRPS25;MRPS18A;MRPL17;MRPL45;MRPL23;CHCHD1;MRPL44
apoptotic mitochondrial changes (GO:0008637)	5/34	0.00131406	0.0698503	6.027	39.987	BCL2;VPS35;NDUFS1;SOD2;BCL2L1
termination of RNA polymerase II transcription (GO:0006369)	7/68	0.00132384	0.0696449	4.2189	27.9596	SARNP;SRSF1;CPSF2;CASC3;SRSF5;SRSF11;SNRPB
mitochondrial translational termination (GO:0070126)	8/89	0.00148801	0.077483	3.68392	23.9835	MRPL40;MRPS25;MRPS18A;MRPL17;MRPL45;MRPL23;CHCHD1;MRPL44
lipid phosphorylation (GO:0046834)	5/35	0.00150273	0.0774587	5.8548	38.059	SMG1;DGKD;DGKQ;PIK3C3;PI4KB
mitochondrial electron transport, cytochrome c to oxygen (GO:0006123)	4/21	0.00150646	0.0768748	7.8064	50.7259	COX7B;COX5B;COX6C;COX6B1
protein-cofactor linkage (GO:0018065)	3/10	0.0015245	0.0770249	12.2951	79.747	LIPT2;LIPT1;LIAS
positive regulation of protein exit from endoplasmic reticulum (GO:0070863)	3/10	0.0015245	0.0762698	12.2951	79.747	BCAP31;TMEM30A;EDEM2
positive regulation of growth (GO:0045927)	7/71	0.00170609	0.0845259	4.04064	25.7532	CDC42;ERBB2;BCL2;DERL2;EGFR;PPM1F;EIF4G2
regulation of neuron death (GO:1901214)	7/72	0.00185091	0.0908192	3.98452	25.0709	DAXX;CDK5;CHORDC1;AKT1S1;RRAS2;VPS35;TSC1
positive regulation of transferase activity (GO:0051347)	10/137	0.00198025	0.0962403	2.9915	18.6207	RFC3;HSP90AB1;RFC4;PTGES3;ERBB2;DCUN1D1;UBE2N;EGFR;FGFR1;MAPK3
transcription from RNA polymerase II promoter (GO:0006366)	23/485	0.00198442	0.0955329	1.94355	12.0936	ESRRA;CREBBP;RARG;CEBPB;CBFB;CDX2;THRA;TAF12;ICE2;NR1H2;SRSF1;INTS10;CPSF2;VEZF1;CASC3;HIF1A;RPAP2;NCOR1;POLR2A;SARNP;SRSF5;SRSF11;SNRPB
positive regulation of mRNA catabolic process (GO:0061014)	4/23	0.00214458	0.102279	7.12758	43.7976	UPF1;CNOT1;AGO2;ZFP36L2
translational termination (GO:0006415)	8/96	0.00241068	0.113905	3.4153	20.5869	MRPL40;MRPS25;MRPS18A;MRPL17;MRPL45;MRPL23;CHCHD1;MRPL44
modification-dependent protein catabolic process (GO:0019941)	10/141	0.00244731	0.114574	2.90664	17.4769	DDB1;CDC23;KCTD10;CUL3;ARIH2;SYVN1;UBE4B;STUB1;ARIH1;UBE2G2
ERBB2 signaling pathway (GO:0038128)	5/39	0.0024607	0.114154	5.25431	31.5642	CUL5;SHC1;ERBB2;STUB1;EGFR
histone mRNA metabolic process (GO:0008334)	4/24	0.00252444	0.116056	6.8306	40.8589	UPF1;CPSF2;LSM1;SNRPB
mRNA metabolic process (GO:0016071)	8/97	0.00257266	0.117217	3.38009	20.1549	SFPQ;PCBP2;SRSF1;CNOT10;SRSF5;ZFP36L2;SRSF11;SNRPB
negative regulation of ERAD pathway (GO:1904293)	3/12	0.00269508	0.121708	10.2459	60.6181	DERL2;UBE2G2;UBE2J1
mitochondrion transport along microtubule (GO:0047497)	3/12	0.00269508	0.12064	10.2459	60.6181	OPA1;HIF1A;LRPPRC
lysine catabolic process (GO:0006554)	3/12	0.00269508	0.119591	10.2459	60.6181	OGDH;DLST;DLD
protein import into peroxisome matrix (GO:0016558)	3/12	0.00269508	0.11856	10.2459	60.6181	PEX5;PEX10;PEX1
lysine metabolic process (GO:0006553)	3/12	0.00269508	0.117547	10.2459	60.6181	OGDH;DLST;DLD
RNA processing (GO:0006396)	12/193	0.00286293	0.123809	2.5482	14.9221	SETX;RBM39;LSM7;SFPQ;DHX36;SRSF1;LSM1;SRSF5;SNRNP35;SRSF11;MRPL44;SNRPB
cellular response to epidermal growth factor stimulus (GO:0071364)	4/25	0.00294804	0.126419	6.55738	38.2073	ERBB2;IQGAP1;EGFR;ZFP36L2
regulation of cholesterol metabolic process (GO:0090181)	5/41	0.00307774	0.130881	4.998	28.9062	SREBF1;NFYC;DGKQ;PMVK;ACACA
cellular response to DNA damage stimulus (GO:0006974)	17/329	0.00313468	0.132201	2.11769	12.209	UPF1;SMG1;RFC3;RBM14;RFC4;CUL5;NCOA6;RPA1;ASH2L;SETX;DDB1;POLE2;BCL2;ATRIP;MCL1;BCL2L1;MAPK3
regulation of protein ubiquitination (GO:0031396)	8/101	0.00330743	0.138343	3.24623	18.5411	DNAJA1;DAXX;PAXIP1;HSP90AB1;CUL3;CHORDC1;UBE2N;STUB1
retrograde vesicle-mediated transport, Golgi to ER (GO:0006890)	7/80	0.00338051	0.14025	3.58607	20.4037	COG7;TMED10;GBF1;TMED2;KIF23;SEC22B;KLC1
ERBB signaling pathway (GO:0038127)	7/80	0.00338051	0.139119	3.58607	20.4037	DGKD;CUL5;SHC1;ERBB2;STUB1;IQGAP1;EGFR
RNA biosynthetic process (GO:0032774)	4/26	0.00341775	0.139526	6.30517	35.8056	SETX;POLR2A;TAF12;NCOA6
protein localization to endoplasmic reticulum (GO:0070972)	3/13	0.00344057	0.139343	9.45776	53.6455	BCAP31;CTAGE5;GBF1
positive regulation of ERAD pathway (GO:1904294)	3/13	0.00344057	0.138246	9.45776	53.6455	BCAP31;TMEM259;EDEM2
RNA 3'-end processing (GO:0031123)	6/61	0.00365472	0.145703	4.03117	22.6219	SARNP;SRSF1;CPSF2;CASC3;SRSF5;SRSF11
cargo loading into vesicle (GO:0035459)	4/27	0.00393585	0.155695	6.07165	33.6225	TMED10;CTAGE5;TMED2;SEC31A
regulation of cell growth (GO:0001558)	12/201	0.00397488	0.156029	2.44678	13.5252	CDC42;NDUFA13;NME6;ERBB2;BCL2;NDUFS3;DERL2;BLZF1;BAP1;EGFR;RTN4;EIF4G2
regulation of steroid biosynthetic process (GO:0050810)	5/44	0.00420189	0.163681	4.65723	25.4854	SREBF1;NFYC;DGKQ;PMVK;ACACA
nuclear-transcribed mRNA catabolic process, deadenylation-dependent decay (GO:0000288)	6/63	0.00429382	0.165995	3.9032	21.2747	LSM7;CNOT11;CNOT1;CNOT2;LSM1;CNOT10
regulation of nuclear-transcribed mRNA catabolic process, deadenylation-dependent decay (GO:1900151)	3/14	0.00430023	0.164993	8.7822	47.855	CNOT1;AGO2;ZFP36L2
retrograde transport, endosome to plasma membrane (GO:1990126)	3/14	0.00430023	0.163762	8.7822	47.855	VPS29;SNX17;VPS35
acyl-CoA biosynthetic process (GO:0071616)	3/14	0.00430023	0.162549	8.7822	47.855	SLC25A1;PPT2;ACACA
metallo-sulfur cluster assembly (GO:0031163)	3/14	0.00430023	0.161353	8.7822	47.855	ISCA2;ISCA1;IBA57
regulation of TORC1 signaling (GO:1903432)	4/28	0.0045046	0.167788	5.8548	31.6315	SZT2;DGKQ;DEPDC5;ITFG2
negative regulation of intracellular steroid hormone receptor signaling pathway (GO:0033144)	4/28	0.0045046	0.166572	5.8548	31.6315	CNOT1;CNOT2;ARNTL;FOXP1
mitochondrial translation (GO:0032543)	8/107	0.00470327	0.172667	3.06419	16.4225	MRPL40;MRPS25;MRPS18A;MRPL17;MRPL23;MRPL45;CHCHD1;MRPL44
positive regulation of histone modification (GO:0031058)	4/29	0.00512616	0.186848	5.65291	29.8101	TADA2B;PAXIP1;UBE2N;MAPK3
nuclear-transcribed mRNA poly(A) tail shortening (GO:0000289)	4/29	0.00512616	0.185523	5.65291	29.8101	CNOT11;CNOT1;CNOT2;CNOT10
positive regulation of peptidyl-lysine acetylation (GO:2000758)	3/15	0.00527883	0.189703	8.19672	42.984	TADA2B;PAXIP1;MAPK3
nuclear pore organization (GO:0006999)	3/15	0.00527883	0.188377	8.19672	42.984	AHCTF1;NUP133;RTN4
negative regulation of TORC1 signaling (GO:1904262)	3/15	0.00527883	0.187068	8.19672	42.984	SZT2;DEPDC5;ITFG2
regulation of mitotic metaphase/anaphase transition (GO:0030071)	3/15	0.00527883	0.185778	8.19672	42.984	CDC23;CUL3;ANAPC11
N-terminal protein amino acid acetylation (GO:0006474)	3/15	0.00527883	0.184506	8.19672	42.984	CREBBP;NAA30;NAA35
negative regulation of programmed cell death (GO:0043069)	19/408	0.00570494	0.198043	1.90855	9.86038	ANKLE2;SHC1;CFLAR;EGFR;KLHL20;SETX;DNAJA1;OPA1;IL2RB;WNK3;ERBB2;BCL2;NAA35;NAA38;PAK2;MCL1;BCL2L1;MAD2L1;FGFR1
regulation of intracellular estrogen receptor signaling pathway (GO:0033146)	4/30	0.00580263	0.200073	5.46448	28.139	KMT2D;CBFB;CNOT1;CNOT2
DNA-templated transcription, initiation (GO:0006352)	11/186	0.00611015	0.209263	2.42376	12.3559	ESRRA;CREBBP;RARG;CBFB;THRA;POLR2A;TAF12;NCOA6;NR1H2;UBTF;MAPK3
regulation of epithelial cell migration (GO:0010632)	5/48	0.00611968	0.208192	4.26913	21.7565	DUSP10;PTPN23;HIF1A;RTN4;PPM1F
regulation of translation (GO:0006417)	12/213	0.00626826	0.211834	2.30894	11.7115	UPF1;EIF5B;NUP133;POLR2A;CNOT1;CNOT2;AGO2;ERBB2;TSC1;CNOT10;VIM;EIF4G2
positive regulation of nuclear-transcribed mRNA catabolic process, deadenylation-dependent decay (GO:1900153)	3/16	0.00638058	0.214211	7.68443	38.8409	CNOT1;AGO2;ZFP36L2
positive regulation of triglyceride metabolic process (GO:0090208)	3/16	0.00638058	0.212811	7.68443	38.8409	SREBF1;NR1H2;CNEP1R1
regulation of cell cycle process (GO:0010564)	7/90	0.00646493	0.214224	3.18761	16.0699	CDC42;AHCTF1;CDK5;PIK3R4;PIK3C3;PKMYT1;BCL2L1
regulation of protein catabolic process (GO:0042176)	7/91	0.00686062	0.225869	3.15259	15.706	DDB1;NDUFA13;HGS;TIPARP;SEC22B;EGFR;MAD2L1
nuclear export (GO:0051168)	7/92	0.00727401	0.237944	3.11832	15.3529	NUP133;SARNP;CHORDC1;SRSF1;CASC3;SRSF5;SRSF11
positive regulation of telomere maintenance (GO:0032206)	4/32	0.00732837	0.238195	5.12295	25.1844	DHX36;ATRX;SIRT6;MAPK3
2-oxoglutarate metabolic process (GO:0006103)	3/17	0.00760916	0.245757	7.2324	35.2826	GOT2;OGDH;DLST
histone H2A ubiquitination (GO:0033522)	3/17	0.00760916	0.244211	7.2324	35.2826	DDB1;UBR2;BCOR
regulation of early endosome to late endosome transport (GO:2000641)	3/17	0.00760916	0.242685	7.2324	35.2826	VPS11;PTPN23;MAPK3
mitochondrion organization (GO:0007005)	10/167	0.00803407	0.254645	2.45411	11.8388	ESRRA;AFG3L2;NDUFB8;OPA1;MRPL17;TSPO;TIMM23;NDUFS1;SOD2;BCL2L1
cellular response to fibroblast growth factor stimulus (GO:0044344)	7/94	0.00815571	0.256905	3.05197	14.677	SETX;FIBP;POLR2A;FGF3;ZFP36L2;MAPK3;FGFR1
protein acetylation (GO:0006473)	4/33	0.00818147	0.256135	4.96771	23.8742	NAT6;CREBBP;NAA30;NAA35
positive regulation of intrinsic apoptotic signaling pathway (GO:2001244)	4/33	0.00818147	0.254573	4.96771	23.8742	BCAP31;SFPQ;BCL2;BCL2L1
cellular response to glucose starvation (GO:0042149)	4/33	0.00818147	0.25303	4.96771	23.8742	SZT2;PIK3R4;PIK3C3;ITFG2
positive regulation of DNA-directed DNA polymerase activity (GO:1900264)	2/6	0.00835041	0.2567	13.6612	65.3749	RFC3;RFC4
positive regulation of protein glycosylation (GO:0060050)	2/6	0.00835041	0.255163	13.6612	65.3749	CHORDC1;ALG10B
regulation of oxidative stress-induced neuron intrinsic apoptotic signaling pathway (GO:1903376)	2/6	0.00835041	0.253644	13.6612	65.3749	HIF1A;MCL1
succinyl-CoA metabolic process (GO:0006104)	2/6	0.00835041	0.252143	13.6612	65.3749	OGDH;DLST
peroxisomal membrane transport (GO:0015919)	2/6	0.00835041	0.25066	13.6612	65.3749	PEX3;PEX5
oxygen homeostasis (GO:0032364)	2/6	0.00835041	0.249194	13.6612	65.3749	SOD2;HIF1A
corticosteroid receptor signaling pathway (GO:0031958)	2/6	0.00835041	0.247745	13.6612	65.3749	RBM14;NCOA6
regulation of DNA-directed DNA polymerase activity (GO:1900262)	2/6	0.00835041	0.246313	13.6612	65.3749	RFC3;RFC4
glucocorticoid receptor signaling pathway (GO:0042921)	2/6	0.00835041	0.244897	13.6612	65.3749	RBM14;NCOA6
positive regulation of proteasomal protein catabolic process (GO:1901800)	6/73	0.00878226	0.256091	3.36852	15.95	KCNE2;TMEM259;ARIH2;KEAP1;STUB1;ARIH1
long-chain fatty-acyl-CoA biosynthetic process (GO:0035338)	3/18	0.00896777	0.260014	6.8306	32.2003	ACSL4;ACSL3;HSD17B12
iron-sulfur cluster assembly (GO:0016226)	3/18	0.00896777	0.258545	6.8306	32.2003	ISCA2;ISCA1;IBA57
release of cytochrome c from mitochondria (GO:0001836)	3/18	0.00896777	0.257093	6.8306	32.2003	BCL2;SOD2;BCL2L1
positive regulation of cellular process (GO:0048522)	22/519	0.0089989	0.256544	1.73726	8.18364	KMT2D;RPS9;HSP90AB1;SHC1;CUL3;CNBP;COX17;DERL2;ASH2L;PTPN23;ACSL3;EGFR;FGF3;ACACA;CDC42;P2RX2;ERBB2;VPS11;BCL2;IER5;EIF4G2;FGFR1
cellular macromolecule biosynthetic process (GO:0034645)	17/367	0.00909279	0.25778	1.89842	8.92311	EEFSEC;UPF1;RPS9;RFC3;RBM14;RFC4;NCOA6;RPA1;MRPS18A;ASH2L;MRPL23;EEF1G;POLR2A;POLE2;AGO2;ATRIP;EIF4G2
regulation of alcohol biosynthetic process (GO:1902930)	4/34	0.00909712	0.256479	4.8216	22.6605	SREBF1;NFYC;PMVK;ACACA
DNA replication (GO:0006260)	8/120	0.00923825	0.259026	2.73224	12.7989	UPF1;RFC3;RBM14;RFC4;NCOA6;POLE2;RPA1;ATRIP
mRNA 3'-end processing (GO:0031124)	6/74	0.00936579	0.261167	3.323	15.5207	SARNP;SRSF1;CPSF2;CASC3;SRSF5;SRSF11
protein localization to organelle (GO:0033365)	7/97	0.00962245	0.266866	2.95758	13.734	DNAJA1;COG7;TMEM30A;CNEP1R1;GBF1;RPA1;MARCH5
positive regulation of RNA metabolic process (GO:0051254)	4/35	0.010077	0.277963	4.68384	21.5339	SETX;POLR2A;DYRK1A;EGFR
regulation of protein kinase activity (GO:0045859)	9/147	0.0101346	0.278046	2.5092	11.5218	DAXX;CHORDC1;AKT1S1;TSC2;JTB;IQGAP1;SMG8;PAK2;PPM1F
error-free translesion synthesis (GO:0070987)	3/19	0.0104591	0.285416	6.4711	29.51	RFC3;RFC4;RPA1
intracellular estrogen receptor signaling pathway (GO:0030520)	3/19	0.0104591	0.283898	6.4711	29.51	RBM14;NCOA6;SAFB
extrinsic apoptotic signaling pathway in absence of ligand (GO:0097192)	3/19	0.0104591	0.282396	6.4711	29.51	BCL2;BCL2L1;MCL1
positive regulation of adherens junction organization (GO:1903393)	3/19	0.0104591	0.280909	6.4711	29.51	TSC1;PTPN23;PPM1F
mitochondrial membrane organization (GO:0007006)	3/19	0.0104591	0.279439	6.4711	29.51	OPA1;BCL2;BCL2L1
DNA metabolic process (GO:0006259)	15/314	0.0106255	0.282405	1.95782	8.89729	UPF1;SMG1;RFC3;RBM14;RFC4;NCOA6;PTGES3;ATRX;RPA1;DDB1;RAD21;POLE2;UBE2N;TK1;ATRIP
positive regulation of DNA biosynthetic process (GO:2000573)	5/55	0.0108265	0.286257	3.72578	16.862	RFC3;HSP90AB1;RFC4;PTGES3;MAPK3
DNA recombination (GO:0006310)	5/55	0.0108265	0.284782	3.72578	16.862	RBM14;NCOA6;RAD21;ATRX;RPA1
regulation of ubiquitin protein ligase activity (GO:1904666)	4/36	0.0111229	0.291077	4.55373	20.4861	CDC23;ANAPC7;ANAPC11;MAD2L1
inner mitochondrial membrane organization (GO:0007007)	4/36	0.0111229	0.289592	4.55373	20.4861	AFG3L2;NDUFA13;OPA1;ATP5O
regulation of hormone biosynthetic process (GO:0046885)	2/7	0.0115027	0.297962	11.7096	52.2854	DGKQ;HIF1A
positive regulation of metaphase/anaphase transition of cell cycle (GO:1902101)	2/7	0.0115027	0.296457	11.7096	52.2854	CUL3;ANAPC11
regulation of DNA endoreduplication (GO:0032875)	2/7	0.0115027	0.294967	11.7096	52.2854	STAG2;E2F8
translational readthrough (GO:0006451)	2/7	0.0115027	0.293492	11.7096	52.2854	EEFSEC;SEPSECS
gas homeostasis (GO:0033483)	2/7	0.0115027	0.292032	11.7096	52.2854	SOD2;HIF1A
regulation of response to biotic stimulus (GO:0002831)	2/7	0.0115027	0.290586	11.7096	52.2854	TRAF3;FOXP1
positive regulation of mitotic sister chromatid separation (GO:1901970)	2/7	0.0115027	0.289155	11.7096	52.2854	CUL3;ANAPC11
positive regulation of mitotic cell cycle spindle assembly checkpoint (GO:0090267)	2/7	0.0115027	0.287737	11.7096	52.2854	NDC80;MAD2L1
selenocysteine incorporation (GO:0001514)	2/7	0.0115027	0.286334	11.7096	52.2854	EEFSEC;SEPSECS
ATP metabolic process (GO:0046034)	5/56	0.0116559	0.288739	3.65925	16.2908	UQCRB;NDUFAF7;UQCRC1;NDUFS1;ATP5O
regulation of transcription from RNA polymerase II promoter (GO:0006357)	50/1478	0.0118356	0.291774	1.38645	6.1512	RARG;THRA;CHD2;ETS2;IER5;SREBF1;RBM14;NCOA6;ATRX;VEZF1;SAFB;FOXP1;SENP1;SFPQ;NCOR1;MED21;DGKQ;BLZF1;KMT2D;CEBPB;CBFB;HIF1A;RPAP2;EGFR;ARNTL;RAD21;DHX36;ERBB2;E2F8;MAPK3;HEXIM1;ESRRA;CREBBP;DMRT1;CDX2;NR1H2;CNBP;NFYC;SOD2;SETX;TADA2B;KLF6;TFAP4;PSMC3;CNOT1;CNOT2;AGO2;BHLHE40;BCOR;BMPR1A
intrinsic apoptotic signaling pathway (GO:0097193)	7/101	0.0118663	0.291124	2.84045	12.5947	CEBPB;CUL5;CUL3;BCL2;PPM1F;MCL1;BCL2L1
fibroblast growth factor receptor signaling pathway (GO:0008543)	6/78	0.0119778	0.292452	3.15259	13.9493	SETX;FIBP;POLR2A;FGF3;MAPK3;FGFR1
regulation of vacuole organization (GO:0044088)	3/20	0.0120854	0.293676	6.14754	27.146	NPRL2;NPRL3;VPS16
telomere maintenance via telomerase (GO:0007004)	3/20	0.0120854	0.292284	6.14754	27.146	HSP90AB1;PTGES3;SMG6
nucleotide-excision repair, DNA incision, 5'-to lesion (GO:0006296)	4/37	0.0122361	0.294532	4.43066	19.5098	DDB1;RFC3;RFC4;RPA1
protein stabilization (GO:0050821)	9/152	0.0124298	0.297789	2.42666	10.6474	MORC3;COG7;HSP90AB1;PTGES3;CHORDC1;SEL1L;SYVN1;TSC1;RTN4
IRE1-mediated unfolded protein response (GO:0036498)	5/57	0.0125275	0.298728	3.59505	15.7457	SHC1;SYVN1;PREB;SEC63;SEC31A
anaphase-promoting complex-dependent catabolic process (GO:0031145)	6/79	0.0127034	0.301513	3.11268	13.5896	CDC23;ANAPC7;PSMC3;CUL3;ANAPC11;MAD2L1
positive regulation of protein kinase B signaling (GO:0051897)	8/127	0.0127366	0.300903	2.58164	11.2644	SEMA5A;OSBPL8;ERBB2;RICTOR;FGF3;RTN4;EGFR;FGFR1
RNA transport (GO:0050658)	6/80	0.0134593	0.31651	3.07377	13.2421	NUP133;SARNP;SRSF1;CASC3;SRSF5;SRSF11
RNA-dependent DNA biosynthetic process (GO:0006278)	3/21	0.0138486	0.324171	5.8548	25.056	HSP90AB1;PTGES3;SMG6
histone ubiquitination (GO:0016574)	3/21	0.0138486	0.322691	5.8548	25.056	UBE2N;UBR2;ATXN7L3
negative regulation of macroautophagy (GO:0016242)	3/21	0.0138486	0.321224	5.8548	25.056	TSC2;TSC1;SEC22B
positive regulation of histone acetylation (GO:0035066)	3/21	0.0138486	0.319771	5.8548	25.056	TADA2B;PAXIP1;MAPK3
mitochondrial ATP synthesis coupled proton transport (GO:0042776)	3/21	0.0138486	0.31833	5.8548	25.056	CYC1;COX5B;ATP5O
cellular response to misfolded protein (GO:0071218)	3/21	0.0138486	0.316903	5.8548	25.056	CUL3;STUB1;RNF185
negative regulation of cell cycle process (GO:0010948)	6/81	0.0142461	0.324544	3.03582	12.9061	HSP90AB1;TFAP4;STAG2;NME6;DMRT1;E2F8
positive regulation of protein catabolic process (GO:0045732)	6/81	0.0142461	0.323101	3.03582	12.9061	DDB1;NDUFA13;TIPARP;VPS11;VPS35;SEC22B
positive regulation of intracellular signal transduction (GO:1902533)	20/479	0.0143944	0.32502	1.71122	7.25712	HEXIM1;SEMA5A;BCAP31;OSBPL8;GOLT1B;SHC1;ILK;CFLAR;EGFR;FGF3;RTN4;TFG;P2RX2;ERBB2;BCL2;UBE2N;RICTOR;CCDC22;BCL2L1;FGFR1
phosphorylation (GO:0016310)	17/386	0.0143995	0.323704	1.80498	7.65412	MORC3;DGKD;UQCRB;DYRK1A;PIK3R4;ILK;CLK3;CDK5;DGKQ;WNK3;ERBB2;UQCRC1;PIK3C3;PAK2;FGFR1;BMPR1A;MAPK3
Golgi to plasma membrane transport (GO:0006893)	4/39	0.0146704	0.328348	4.20345	17.7466	SYS1;CCDC22;CCDC93;BLZF1
retrograde transport, endosome to Golgi (GO:0042147)	6/82	0.0150643	0.335692	2.9988	12.5812	VPS29;VPS51;VPS52;GBF1;VPS35;TBC1D10B
positive regulation of DNA metabolic process (GO:0051054)	6/82	0.0150643	0.334232	2.9988	12.5812	SHC1;ATRX;DHX36;UBE2N;SIRT6;EGFR
regulation of establishment of protein localization to mitochondrion (GO:1903747)	2/8	0.015091	0.333375	10.2459	42.9678	DNAJA1;SREBF1
positive regulation of mitotic metaphase/anaphase transition (GO:0045842)	2/8	0.015091	0.331938	10.2459	42.9678	CUL3;ANAPC11
negative regulation of execution phase of apoptosis (GO:1900118)	2/8	0.015091	0.330513	10.2459	42.9678	PAK2;BCL2L1
positive regulation of early endosome to late endosome transport (GO:2000643)	2/8	0.015091	0.329101	10.2459	42.9678	VPS11;PTPN23
protein desumoylation (GO:0016926)	2/8	0.015091	0.3277	10.2459	42.9678	SENP3;SENP1
positive regulation of spindle checkpoint (GO:0090232)	2/8	0.015091	0.326312	10.2459	42.9678	NDC80;MAD2L1
positive regulation of catenin import into nucleus (GO:0035413)	2/8	0.015091	0.324935	10.2459	42.9678	SEMA5A;EGFR
TORC1 signaling (GO:0038202)	2/8	0.015091	0.323569	10.2459	42.9678	AKT1S1;NPRL3
regulation of lipid transport (GO:0032368)	2/8	0.015091	0.322216	10.2459	42.9678	NCOR1;NR1H2
regulation of cytoplasmic mRNA processing body assembly (GO:0010603)	2/8	0.015091	0.320873	10.2459	42.9678	CNOT1;CNOT2
membrane lipid biosynthetic process (GO:0046467)	5/60	0.0154042	0.326173	3.4153	14.2524	COL4A3BP;SPTLC1;SPTLC2;KDSR;SPTSSA
histone lysine methylation (GO:0034968)	3/22	0.01575	0.332118	5.58867	23.1981	KMT2D;PAXIP1;ASH2L
positive regulation of RNA splicing (GO:0033120)	3/22	0.01575	0.330751	5.58867	23.1981	SETX;POLR2A;DYRK1A
positive regulation of protein ubiquitination (GO:0031398)	6/83	0.0159147	0.332838	2.96267	12.267	PAXIP1;CUL3;DCUN1D1;UBE2N;STUB1;CCDC22
positive regulation of homeostatic process (GO:0032846)	6/83	0.0159147	0.33148	2.96267	12.267	ATP6AP1;P2RX2;ATRX;DHX36;SIRT6;HIF1A
nucleotide-excision repair, DNA incision (GO:0033683)	4/40	0.0159942	0.331782	4.09836	16.9489	DDB1;RFC3;RFC4;RPA1
regulation of cholesterol biosynthetic process (GO:0045540)	4/40	0.0159942	0.330439	4.09836	16.9489	SREBF1;NFYC;PMVK;ACACA
negative regulation of apoptotic process (GO:0043066)	20/485	0.0162539	0.334451	1.69005	6.96201	ANKLE2;SHC1;CFLAR;SOD2;EGFR;KLHL20;SETX;DNAJA1;OPA1;IL2RB;WNK3;ERBB2;BCL2;NAA35;NAA38;PAK2;MCL1;BCL2L1;MAD2L1;FGFR1
positive regulation of cellular biosynthetic process (GO:0031328)	9/159	0.0162657	0.333349	2.31983	9.55466	SREBF1;HSP90AB1;SHC1;CNEP1R1;NR1H2;ERBB2;VIM;HIF1A;EGFR
positive regulation of transcription, DNA-templated (GO:0045893)	39/1120	0.0164285	0.335339	1.42711	5.86361	KMT2D;RARG;CEBPB;THRA;SHC1;ICE2;ILK;HIF1A;EGFR;ETS2;ARNTL;CKS1B;ZIC2;DHX36;ERBB2;UBTF;IER5;ATXN7L3;E2F8;MAPK3;ESRRA;SREBF1;CREBBP;RBM14;DMRT1;NCOA6;NR1H2;CNBP;ATRX;VEZF1;SENP1;SETX;KLF6;SFPQ;TFAP4;PSMC3;MED21;AGO2;BMPR1A
protein targeting (GO:0006605)	8/133	0.0164355	0.334144	2.46518	10.1277	NDUFB8;SYS1;PMM2;PIK3R4;TSPO;TIMM23;PEX1;SEC63
regulation of mitotic nuclear division (GO:0007088)	6/84	0.0167976	0.340151	2.9274	11.9629	CDC23;STAG2;NME6;DMRT1;PKMYT1;CHMP5
regulation of cellular metabolic process (GO:0031323)	4/41	0.0173906	0.350767	3.9984	16.2008	ARF1;VPS35;STUB1;ACACA
DNA damage response, signal transduction by p53 class mediator resulting in cell cycle arrest (GO:0006977)	5/62	0.0175488	0.352565	3.30513	13.3619	CNOT11;CNOT1;CNOT2;CNOT10;E2F8
negative regulation of gene expression (GO:0010629)	24/618	0.0175984	0.352175	1.5916	6.42997	HEXIM1;DAXX;NDUFA13;THRA;TIPARP;SHC1;NR1H2;TSC1;CNOT10;HIF1A;PPM1F;ZFP36L2;FOXP1;ARNTL;SFPQ;NCOR1;TFAP4;CDK5;ZIC2;CNOT1;DGKQ;CNOT2;BHLHE40;BCOR
nucleotide-excision repair, DNA gap filling (GO:0006297)	3/23	0.0177909	0.354636	5.34569	21.5381	RFC3;RFC4;RPA1
protein K48-linked deubiquitination (GO:0071108)	3/23	0.0177909	0.353256	5.34569	21.5381	USP8;USP34;BAP1
peroxisome organization (GO:0007031)	3/23	0.0177909	0.351887	5.34569	21.5381	PEX3;PEX10;PEX1
negative regulation of signal transduction in absence of ligand (GO:1901099)	3/23	0.0177909	0.350528	5.34569	21.5381	BCL2;BCL2L1;MCL1
negative regulation of extrinsic apoptotic signaling pathway in absence of ligand (GO:2001240)	3/23	0.0177909	0.34918	5.34569	21.5381	BCL2;BCL2L1;MCL1
histone H3-K4 methylation (GO:0051568)	3/23	0.0177909	0.347842	5.34569	21.5381	KMT2D;PAXIP1;ASH2L
macroautophagy (GO:0016236)	7/110	0.0182563	0.355581	2.60805	10.4406	HGS;VPS33A;PIK3R4;PIK3C3;AMBRA1;DYNLL1;VPS16
signal transduction involved in mitotic G1 DNA damage checkpoint (GO:0072431)	5/63	0.0186915	0.362671	3.25267	12.9446	CNOT11;CNOT1;CNOT2;CNOT10;E2F8
regulation of protein kinase B signaling (GO:0051896)	9/163	0.0188131	0.363649	2.2629	8.99095	SEMA5A;OSBPL8;ERBB2;TSC2;RICTOR;FGF3;RTN4;EGFR;FGFR1
regulation of telomerase activity (GO:0051972)	4/42	0.0188606	0.363192	3.9032	15.4984	HSP90AB1;PTGES3;SMG6;MAPK3
translesion synthesis (GO:0019985)	4/42	0.0188606	0.361827	3.9032	15.4984	RFC3;RFC4;POLE2;RPA1
mitochondrial respiratory chain complex III assembly (GO:0034551)	2/9	0.0190923	0.364898	9.10747	36.0517	UQCRB;UQCR10
ATP synthesis coupled electron transport (GO:0042773)	2/9	0.0190923	0.363537	9.10747	36.0517	NDUFB6;NDUFS2
respiratory chain complex III assembly (GO:0017062)	2/9	0.0190923	0.362185	9.10747	36.0517	UQCRB;UQCR10
Golgi vesicle budding (GO:0048194)	2/9	0.0190923	0.360844	9.10747	36.0517	TMED10;SEC31A
production of siRNA involved in RNA interference (GO:0030422)	2/9	0.0190923	0.359512	9.10747	36.0517	AGO2;MRPL44
positive regulation of vascular endothelial cell proliferation (GO:1905564)	2/9	0.0190923	0.35819	9.10747	36.0517	SIRT6;FGFR1
axonal transport of mitochondrion (GO:0019896)	2/9	0.0190923	0.356878	9.10747	36.0517	OPA1;HIF1A
MAPK cascade (GO:0000165)	13/278	0.019517	0.363486	1.9165	7.54424	BRAP;SHC1;CUL3;ILK;EGFR;FGF3;ZFP36L2;SETX;PSMC3;ERBB2;IL2RB;FGFR1;MAPK3
positive regulation of protein ubiquitination involved in ubiquitin-dependent protein catabolic process (GO:2000060)	6/87	0.0196475	0.364585	2.82646	11.1074	CDC23;ANAPC7;PSMC3;CCDC22;ANAPC11;MAD2L1
nuclear-transcribed mRNA catabolic process, nonsense-mediated decay (GO:0000184)	7/112	0.0199516	0.368887	2.56148	10.0268	UPF1;RPS9;SMG1;SMG9;CASC3;SMG8;SMG6
histone monoubiquitination (GO:0010390)	3/24	0.0199718	0.367928	5.12295	20.0483	DDB1;BCOR;ATXN7L3
regulation of chromosome organization (GO:0033044)	3/24	0.0199718	0.366605	5.12295	20.0483	UPF1;SMG1;SMG6
mRNA splice site selection (GO:0006376)	3/24	0.0199718	0.365291	5.12295	20.0483	SETX;SRSF1;SRSF5
fatty acid derivative biosynthetic process (GO:1901570)	3/24	0.0199718	0.363986	5.12295	20.0483	SLC25A1;PPT2;ACACA
mitotic metaphase plate congression (GO:0007080)	4/43	0.0204054	0.370565	3.81243	14.8378	CDC23;CUL3;NDC80;CHMP5
negative regulation of ERBB signaling pathway (GO:1901185)	4/43	0.0204054	0.369251	3.81243	14.8378	CDC42;HGS;ERBB2;EGFR
substantia nigra development (GO:0021762)	4/43	0.0204054	0.367946	3.81243	14.8378	CDC42;NDUFS3;DYNLL1;COX6B1
positive regulation of developmental process (GO:0051094)	7/113	0.0208391	0.374444	2.53881	9.82753	PAXIP1;HSP90AB1;AGO2;VPS35;MARCH5;RTN4;BMPR1A
metaphase plate congression (GO:0051310)	4/44	0.0220258	0.394377	3.72578	14.2159	CDC23;CUL3;NDC80;CHMP5
misfolded or incompletely synthesized protein catabolic process (GO:0006515)	3/25	0.0222932	0.39777	4.91803	18.7056	CUL3;STUB1;RNF185
long-chain fatty-acyl-CoA metabolic process (GO:0035336)	3/25	0.0222932	0.396384	4.91803	18.7056	ACSL4;HSD17B12;ACSL3
sphingolipid biosynthetic process (GO:0030148)	5/66	0.0224097	0.397071	3.10482	11.7929	COL4A3BP;SPTLC1;SPTLC2;KDSR;SPTSSA
cellular response to oxidative stress (GO:0034599)	7/115	0.0226958	0.40075	2.49465	9.4437	SETX;TXNRD1;SOD2;HIF1A;EGFR;ARNTL;MAPK3
regulation of myeloid leukocyte differentiation (GO:0002761)	2/10	0.0234842	0.413241	8.19672	30.7494	CEBPB;FOXP1
3'-UTR-mediated mRNA destabilization (GO:0061158)	2/10	0.0234842	0.411821	8.19672	30.7494	UPF1;ZFP36L2
positive regulation of transcription from RNA polymerase III promoter (GO:0045945)	2/10	0.0234842	0.410411	8.19672	30.7494	ICE2;ERBB2
positive regulation of cytoplasmic transport (GO:1903651)	2/10	0.0234842	0.40901	8.19672	30.7494	VPS11;PTPN23
cellular copper ion homeostasis (GO:0006878)	2/10	0.0234842	0.407619	8.19672	30.7494	ARF1;CCDC22
regulation of DNA-templated transcription, initiation (GO:2000142)	2/10	0.0234842	0.406237	8.19672	30.7494	SETX;THRA
nuclear pore complex assembly (GO:0051292)	2/10	0.0234842	0.404865	8.19672	30.7494	AHCTF1;RTN4
mitochondrial respiratory chain complex III biogenesis (GO:0097033)	2/10	0.0234842	0.403501	8.19672	30.7494	UQCRB;UQCR10
protein localization to mitochondrion (GO:0070585)	2/10	0.0234842	0.402147	8.19672	30.7494	DNAJA1;MARCH5
neuron projection fasciculation (GO:0106030)	2/10	0.0234842	0.400802	8.19672	30.7494	SEMA5A;RTN4
negative regulation of intracellular estrogen receptor signaling pathway (GO:0033147)	2/10	0.0234842	0.399466	8.19672	30.7494	CNOT1;CNOT2
negative regulation of kinase activity (GO:0033673)	6/91	0.0239356	0.405792	2.70222	10.0857	NPRL2;CHORDC1;AKT1S1;TSC2;PAK2;PPM1F
regulation of histone acetylation (GO:0035065)	3/26	0.0247552	0.418298	4.72888	17.4908	TADA2B;PAXIP1;MAPK3
cell cycle G1/S phase transition (GO:0044843)	6/92	0.0250981	0.422691	2.67284	9.84934	PPP6C;WEE1;CUL5;CUL3;POLE2;RPA1
DNA repair (GO:0006281)	13/288	0.0251672	0.422461	1.84995	6.81193	UPF1;SMG1;RFC3;RBM14;RFC4;NCOA6;RPA1;SETX;DDB1;RAD21;POLE2;UBE2N;ATRIP
interleukin-12-mediated signaling pathway (GO:0035722)	4/46	0.0254964	0.426583	3.56379	13.0763	CDC42;ARF1;SOD2;PAK2
cellular response to interleukin-12 (GO:0071349)	4/46	0.0254964	0.425189	3.56379	13.0763	CDC42;ARF1;SOD2;PAK2
negative regulation of autophagy (GO:0010507)	4/46	0.0254964	0.423804	3.56379	13.0763	BCL2;TSC1;EIF4G2;MCL1
regulation of DNA metabolic process (GO:0051052)	4/46	0.0254964	0.422428	3.56379	13.0763	UPF1;SMG1;UBE2N;SMG6
regulation of phosphorylation (GO:0042325)	7/119	0.0267457	0.441694	2.4108	8.73043	ANKLE2;NUP133;PTGES3;ILK;RICTOR;DYNLL1;EGFR
positive regulation of transcription from RNA polymerase II promoter (GO:0045944)	30/848	0.0273439	0.450116	1.44989	5.21854	KMT2D;RARG;CEBPB;PAXIP1;THRA;HIF1A;EGFR;ARNTL;DHX36;IER5;E2F8;MAPK3;ESRRA;SREBF1;CREBBP;RBM14;DMRT1;NCOA6;NR1H2;CNBP;ATRX;VEZF1;SENP1;SETX;KLF6;SFPQ;PSMC3;MED21;AGO2;BMPR1A
postreplication repair (GO:0006301)	4/47	0.0273479	0.448735	3.48797	12.5536	RFC3;RFC4;RPA1;UBE2N
ATP synthesis coupled proton transport (GO:0015986)	3/27	0.0273577	0.447456	4.55373	16.3878	CYC1;COX5B;ATP5O
telomere maintenance via telomere lengthening (GO:0010833)	3/27	0.0273577	0.446026	4.55373	16.3878	HSP90AB1;PTGES3;SMG6
phosphatidylinositol phosphorylation (GO:0046854)	3/27	0.0273577	0.444606	4.55373	16.3878	SMG1;PIK3C3;PI4KB
endocytic recycling (GO:0032456)	3/27	0.0273577	0.443194	4.55373	16.3878	VPS51;VPS52;PTPN23
regulation of extrinsic apoptotic signaling pathway in absence of ligand (GO:2001239)	3/27	0.0273577	0.441792	4.55373	16.3878	BCL2;MCL1;BCL2L1
protein localization to chromosome (GO:0034502)	3/27	0.0273577	0.440398	4.55373	16.3878	RAD21;ATRX;RPA1
positive regulation of proteasomal ubiquitin-dependent protein catabolic process (GO:0032436)	5/70	0.0280682	0.450415	2.9274	10.46	BCAP31;ARIH2;KEAP1;STUB1;ARIH1
regulation of stem cell population maintenance (GO:2000036)	2/11	0.0282455	0.45184	7.45156	26.5784	CNOT1;CNOT2
interleukin-2-mediated signaling pathway (GO:0038110)	2/11	0.0282455	0.450428	7.45156	26.5784	SHC1;IL2RB
negative regulation of nuclear division (GO:0051784)	2/11	0.0282455	0.449025	7.45156	26.5784	DMRT1;NME6
negative regulation of JUN kinase activity (GO:0043508)	2/11	0.0282455	0.44763	7.45156	26.5784	DNAJA1;DUSP10
positive regulation of nuclear-transcribed mRNA poly(A) tail shortening (GO:0060213)	2/11	0.0282455	0.446244	7.45156	26.5784	CNOT1;AGO2
regulation of hemopoiesis (GO:1903706)	2/11	0.0282455	0.444867	7.45156	26.5784	CREBBP;CBFB
positive regulation of glycoprotein biosynthetic process (GO:0010560)	2/11	0.0282455	0.443498	7.45156	26.5784	CHORDC1;ALG10B
regulation of nuclear-transcribed mRNA poly(A) tail shortening (GO:0060211)	2/11	0.0282455	0.442138	7.45156	26.5784	CNOT1;AGO2
cellular response to interleukin-2 (GO:0071352)	2/11	0.0282455	0.440786	7.45156	26.5784	SHC1;IL2RB
histone mRNA catabolic process (GO:0071044)	2/11	0.0282455	0.439442	7.45156	26.5784	UPF1;LSM1
regulation of RNA polymerase II transcriptional preinitiation complex assembly (GO:0045898)	2/11	0.0282455	0.438106	7.45156	26.5784	THRA;PSMC3
cellular response to interferon-beta (GO:0035458)	2/11	0.0282455	0.436778	7.45156	26.5784	NDUFA13;UBE2G2
positive regulation of sodium ion transmembrane transporter activity (GO:2000651)	2/11	0.0282455	0.435459	7.45156	26.5784	CHORDC1;WNK3
oxidative phosphorylation (GO:0006119)	2/11	0.0282455	0.434147	7.45156	26.5784	UQCRB;UQCRC1
protein O-linked mannosylation (GO:0035269)	2/11	0.0282455	0.432843	7.45156	26.5784	DPM1;DPM2
regulation of signal transduction (GO:0009966)	11/233	0.0284013	0.433928	1.93485	6.89062	BRAP;SEMA5A;CREBBP;CBFB;DGKQ;GRK6;ERBB2;TSC2;ILK;EGFR;FGFR1
positive regulation of protein localization to membrane (GO:1905477)	6/95	0.0288093	0.438847	2.58844	9.18134	CHORDC1;ERBB2;WNK3;BCL2;DYNLL1;EGFR
Golgi organization (GO:0007030)	7/121	0.0289442	0.43959	2.37095	8.39883	CDC42;COG7;TMED10;VPS51;GBF1;TMED2;BLZF1
endosome to lysosome transport (GO:0008333)	4/48	0.0292778	0.443337	3.4153	12.0592	VPS18;VPS33A;VPS11;VPS16
negative regulation of ubiquitin-protein ligase activity involved in mitotic cell cycle (GO:0051436)	5/71	0.0296117	0.447066	2.88617	10.1581	CDC23;ANAPC7;PSMC3;ANAPC11;MAD2L1
post-translational protein modification (GO:0043687)	15/357	0.0298132	0.448782	1.722	6.04905	UBE2F;WSB2;CUL5;CUL3;DCUN1D1;KEAP1;RNF7;HIF1A;KLHL42;KLHL20;DDB1;PSMC3;ASB6;CCDC22;UBE2M
positive regulation of phosphate metabolic process (GO:0045937)	3/28	0.0301	0.451766	4.3911	15.383	PTGES3;ILK;EGFR
protein K11-linked ubiquitination (GO:0070979)	3/28	0.0301	0.450441	4.3911	15.383	CDC23;ANAPC7;ANAPC11
negative regulation of JNK cascade (GO:0046329)	3/28	0.0301	0.449124	4.3911	15.383	DNAJA1;DUSP10;NCOR1
positive regulation of lipid biosynthetic process (GO:0046889)	3/28	0.0301	0.447815	4.3911	15.383	SREBF1;NR1H2;CNEP1R1
lipid biosynthetic process (GO:0008610)	5/72	0.0312077	0.462944	2.84608	9.86763	SREBF1;PCYT2;AGPS;FITM2;ACACA
regulation of ubiquitin-protein ligase activity involved in mitotic cell cycle (GO:0051439)	5/72	0.0312077	0.461602	2.84608	9.86763	CDC23;ANAPC7;PSMC3;ANAPC11;MAD2L1
transcription-coupled nucleotide-excision repair (GO:0006283)	5/73	0.0328566	0.484587	2.8071	9.58793	DDB1;RFC3;RFC4;POLR2A;RPA1
regulation of protein complex assembly (GO:0043254)	5/73	0.0328566	0.483191	2.8071	9.58793	CDC42;VPS18;VPS11;PREB;VPS16
phosphatidylinositol biosynthetic process (GO:0006661)	6/98	0.0328646	0.481919	2.5092	8.56982	DPM1;DPM2;ARF1;PIK3R4;PIK3C3;PI4KB
positive regulation of cell growth (GO:0030307)	6/98	0.0328646	0.480538	2.5092	8.56982	CDC42;ERBB2;BCL2;DERL2;EIF4G2;EGFR
cellular response to cadmium ion (GO:0071276)	3/29	0.0329817	0.480873	4.23968	14.465	DAXX;EGFR;MAPK3
vacuolar transport (GO:0007034)	3/29	0.0329817	0.479503	4.23968	14.465	VPS51;VPS52;PIK3R4
axonal fasciculation (GO:0007413)	2/12	0.0333556	0.483562	6.8306	23.2277	SEMA5A;RTN4
regulation of protein glycosylation (GO:0060049)	2/12	0.0333556	0.482192	6.8306	23.2277	CHORDC1;ALG10B
viral RNA genome replication (GO:0039694)	2/12	0.0333556	0.48083	6.8306	23.2277	CDC42;PCBP2
regulation of actomyosin structure organization (GO:0110020)	2/12	0.0333556	0.479475	6.8306	23.2277	CDC42;TSC1
alternative mRNA splicing, via spliceosome (GO:0000380)	2/12	0.0333556	0.478128	6.8306	23.2277	SFPQ;SRSF1
regulation of sequestering of triglyceride (GO:0010889)	2/12	0.0333556	0.476789	6.8306	23.2277	OSBPL8;FITM2
positive regulation of DNA-dependent DNA replication (GO:2000105)	2/12	0.0333556	0.475457	6.8306	23.2277	ATRX;E2F8
regulation of vascular endothelial cell proliferation (GO:1905562)	2/12	0.0333556	0.474133	6.8306	23.2277	SIRT6;FGFR1
positive regulation of mRNA metabolic process (GO:1903313)	2/12	0.0333556	0.472816	6.8306	23.2277	UPF1;CNOT1
beta-catenin-TCF complex assembly (GO:1904837)	3/30	0.0360016	0.508908	4.09836	13.6237	KMT2D;CREBBP;ASH2L
regulation of mitotic cell cycle phase transition (GO:1901990)	9/184	0.0370742	0.522623	2.00463	6.60493	DDB1;CDC23;TFAP4;ANAPC7;PSMC3;DYNLL1;ZFP36L2;ANAPC11;MAD2L1
positive regulation of ubiquitin-protein ligase activity involved in regulation of mitotic cell cycle transition (GO:0051437)	5/76	0.0381246	0.535949	2.69629	8.8085	CDC23;ANAPC7;PSMC3;ANAPC11;MAD2L1
regulation of cell cycle (GO:0051726)	10/215	0.0387774	0.54363	1.90621	6.19504	WEE1;GBF1;TSC2;TSC1;IQGAP1;PKMYT1;PAK2;BAP1;ARNTL;CKS1B
DNA strand elongation (GO:0022616)	2/13	0.0387947	0.542382	6.30517	20.4885	RFC3;RFC4
response to iron ion (GO:0010039)	2/13	0.0387947	0.5409	6.30517	20.4885	BCL2;HIF1A
mitochondrial genome maintenance (GO:0000002)	2/13	0.0387947	0.539426	6.30517	20.4885	OPA1;MRPL17
regulation of cell aging (GO:0090342)	2/13	0.0387947	0.537961	6.30517	20.4885	MARCH5;ARNTL
regulation of production of miRNAs involved in gene silencing by miRNA (GO:1903798)	2/13	0.0387947	0.536503	6.30517	20.4885	NCOR1;EGFR
positive regulation of endothelial cell chemotaxis (GO:2001028)	2/13	0.0387947	0.535053	6.30517	20.4885	SEMA5A;FGFR1
copper ion homeostasis (GO:0055070)	2/13	0.0387947	0.53361	6.30517	20.4885	ARF1;CCDC22
cellular response to interleukin-15 (GO:0071350)	2/13	0.0387947	0.532176	6.30517	20.4885	SHC1;IL2RB
toll-like receptor 9 signaling pathway (GO:0034162)	2/13	0.0387947	0.530749	6.30517	20.4885	PIK3R4;PIK3C3
regulation of oxidoreductase activity (GO:0051341)	2/13	0.0387947	0.52933	6.30517	20.4885	SZT2;ECSIT
RNA interference (GO:0016246)	2/13	0.0387947	0.527919	6.30517	20.4885	AGO2;MRPL44
diacylglycerol metabolic process (GO:0046339)	2/13	0.0387947	0.526515	6.30517	20.4885	DGKD;DGKQ
interleukin-15-mediated signaling pathway (GO:0035723)	2/13	0.0387947	0.525118	6.30517	20.4885	SHC1;IL2RB
pre-miRNA processing (GO:0031054)	2/13	0.0387947	0.523729	6.30517	20.4885	AGO2;MRPL44
positive regulation of protein dephosphorylation (GO:0035307)	3/31	0.0391586	0.527246	3.96616	12.8509	ANKLE2;HSP90AB1;CNEP1R1
cofactor biosynthetic process (GO:0051188)	3/31	0.0391586	0.525858	3.96616	12.8509	ISCA2;ISCA1;IBA57
response to cadmium ion (GO:0046686)	3/31	0.0391586	0.524478	3.96616	12.8509	DAXX;EGFR;MAPK3
lysosome organization (GO:0007040)	3/31	0.0391586	0.523105	3.96616	12.8509	VPS18;VPS33A;VPS11
liver development (GO:0001889)	3/31	0.0391586	0.521739	3.96616	12.8509	CEBPB;RARG;E2F8
negative regulation of ubiquitin protein ligase activity (GO:1904667)	5/77	0.0399886	0.531412	2.66127	8.56706	CDC23;ANAPC7;PSMC3;ANAPC11;MAD2L1
central nervous system development (GO:0007417)	10/217	0.0408737	0.541762	1.88865	6.03851	ANKLE2;COX7B;RARG;SZT2;CDK5;THRA;ZIC2;NCOA6;SMG9;FGFR1
ceramide biosynthetic process (GO:0046513)	3/32	0.0424514	0.561216	3.84221	12.1391	SPTLC1;SPTLC2;SPTSSA
mitochondrial transmembrane transport (GO:1990542)	3/32	0.0424514	0.559766	3.84221	12.1391	AFG3L2;NDUFA13;ACACA
purine ribonucleoside triphosphate metabolic process (GO:0009205)	3/32	0.0424514	0.558323	3.84221	12.1391	OPA1;NDUFAF7;NDUFS1
protein targeting to mitochondrion (GO:0006626)	4/54	0.04252	0.557788	3.03582	9.58646	NDUFA13;NDUFB8;TSPO;TIMM23
transcription initiation from RNA polymerase II promoter (GO:0006367)	8/160	0.0428464	0.560629	2.04918	6.45519	ESRRA;CREBBP;RARG;CBFB;THRA;POLR2A;TAF12;NR1H2
G1/S transition of mitotic cell cycle (GO:0000082)	6/105	0.0437144	0.570523	2.34192	7.33039	PPP6C;WEE1;CUL5;CUL3;POLE2;RPA1
regulation of Golgi organization (GO:1903358)	2/14	0.0445438	0.579865	5.8548	18.2159	CAMSAP2;MAPK3
acetyl-CoA metabolic process (GO:0006084)	2/14	0.0445438	0.57839	5.8548	18.2159	PMVK;ACACA
ubiquinone metabolic process (GO:0006743)	2/14	0.0445438	0.576922	5.8548	18.2159	UBIAD1;COQ2
lipid particle organization (GO:0034389)	2/14	0.0445438	0.575461	5.8548	18.2159	FAF2;FITM2
regulation of phosphate metabolic process (GO:0019220)	2/14	0.0445438	0.574008	5.8548	18.2159	RICTOR;SMG6
pore complex assembly (GO:0046931)	2/14	0.0445438	0.572562	5.8548	18.2159	AHCTF1;RTN4
regulation of monocyte differentiation (GO:0045655)	2/14	0.0445438	0.571123	5.8548	18.2159	ACIN1;FOXP1
positive regulation of mitochondrial fission (GO:0090141)	2/14	0.0445438	0.569692	5.8548	18.2159	VPS35;MARCH5
regulation of defense response to virus (GO:0050688)	2/14	0.0445438	0.568268	5.8548	18.2159	TRAF3;PCBP2
quinone biosynthetic process (GO:1901663)	2/14	0.0445438	0.566851	5.8548	18.2159	UBIAD1;COQ2
negative regulation of endoplasmic reticulum stress-induced intrinsic apoptotic signaling pathway (GO:1902236)	2/14	0.0445438	0.565441	5.8548	18.2159	OPA1;SYVN1
cellular response to nitrogen compound (GO:1901699)	2/14	0.0445438	0.564038	5.8548	18.2159	DAXX;ATRX
regulation of protein modification by small protein conjugation or removal (GO:1903320)	2/14	0.0445438	0.562641	5.8548	18.2159	DAXX;HSP90AB1
regulation of mRNA catabolic process (GO:0061013)	2/14	0.0445438	0.561252	5.8548	18.2159	UPF1;CNOT1
regulation of mitotic cell cycle spindle assembly checkpoint (GO:0090266)	2/14	0.0445438	0.55987	5.8548	18.2159	NDC80;MAD2L1
regulation of RNA splicing (GO:0043484)	4/55	0.0450058	0.564286	2.98063	9.24282	SETX;POLR2A;DYRK1A;CLK3
mitotic cell cycle phase transition (GO:0044772)	10/221	0.0452964	0.566538	1.85446	5.73868	PPP1CB;PPP6C;WEE1;CDC23;CUL5;CUL3;POLE2;RPA1;DYNLL1;PKMYT1
positive regulation of cellular catabolic process (GO:0031331)	6/106	0.0454268	0.56678	2.31983	7.1721	UPF1;CNOT1;NPRL2;VPS11;VPS35;HIF1A
response to endoplasmic reticulum stress (GO:0034976)	6/106	0.0454268	0.565398	2.31983	7.1721	CEBPB;TMEM259;SEL1L;BCL2;SYVN1;RNF185
RNA splicing (GO:0008380)	6/106	0.0454268	0.564022	2.31983	7.1721	DBR1;SFPQ;LSM1;SNRNP35;SRSF11;SNRPB
platelet aggregation (GO:0070527)	3/33	0.0458784	0.568246	3.72578	11.482	FIBP;GNAS;ILK
regulation of autophagosome assembly (GO:2000785)	3/33	0.0458784	0.56687	3.72578	11.482	NPRL2;NPRL3;SEC22B
nucleic acid metabolic process (GO:0090304)	5/80	0.0459085	0.565872	2.56148	7.89217	POLR2A;PCBP2;LSM1;CASC3;TK1
intracellular protein transport (GO:0006886)	14/347	0.0464489	0.571154	1.65352	5.07531	VPS29;COG7;TMED10;NUP133;TSC2;DSCR3;CTAGE5;SNX17;CHORDC1;TMED2;VPS35;PREB;TBC1D10B;SEC31A
negative regulation of cellular macromolecule biosynthetic process (GO:2000113)	19/512	0.047205	0.579056	1.52088	4.64362	HEXIM1;DAXX;NDUFA13;THRA;SHC1;NR1H2;TSC1;CNOT10;PPM1F;FOXP1;ARNTL;SFPQ;TFAP4;CDK5;ZIC2;CNOT1;CNOT2;BHLHE40;BCOR
DNA-dependent DNA replication (GO:0006261)	4/56	0.0475711	0.582148	2.9274	8.91548	RFC3;RFC4;POLE2;RPA1
phosphatidylinositol-mediated signaling (GO:0048015)	4/56	0.0475711	0.580755	2.9274	8.91548	ERBB2;PIK3C3;PI4KB;FGFR1
glycerophospholipid biosynthetic process (GO:0046474)	8/164	0.0483074	0.588335	1.9992	6.05792	ARF1;PCYT2;PCYT1A;DGKQ;PIK3R4;PIK3C3;PI4KB;CEPT1
nucleotide-excision repair (GO:0006289)	6/108	0.0489755	0.595052	2.27687	6.86802	DDB1;RFC3;RFC4;POLR2A;UBE2N;RPA1
positive regulation of cytokinesis (GO:0032467)	3/34	0.0494378	0.599243	3.6162	10.8741	CDC42;CUL3;KIF23
cellular macromolecular complex assembly (GO:0034622)	3/34	0.0494378	0.597823	3.6162	10.8741	TMED10;CTAGE5;TMED2
regulation of mitotic cell cycle (GO:0007346)	8/165	0.0497401	0.600056	1.98708	5.96313	DDB1;TFAP4;GBF1;IQGAP1;PKMYT1;PAK2;CKS1B;MAD2L1
mitotic sister chromatid segregation (GO:0000070)	5/82	0.0501297	0.60333	2.499	7.47986	CDC23;CUL3;KIF23;NDC80;CHMP5
positive regulation of ubiquitin protein ligase activity (GO:1904668)	5/82	0.0501297	0.60191	2.499	7.47986	CDC23;ANAPC7;PSMC3;ANAPC11;MAD2L1
positive regulation of cell cycle arrest (GO:0071158)	5/82	0.0501297	0.600497	2.499	7.47986	CNOT11;CNOT1;CNOT2;CNOT10;E2F8
epidermal growth factor receptor signaling pathway (GO:0007173)	4/57	0.050216	0.600122	2.87604	8.60346	DGKD;SHC1;IQGAP1;EGFR
ubiquinone biosynthetic process (GO:0006744)	2/15	0.0505846	0.603115	5.46448	16.3066	UBIAD1;COQ2
phosphatidylethanolamine biosynthetic process (GO:0006646)	2/15	0.0505846	0.601709	5.46448	16.3066	PCYT2;CEPT1
regulation of B cell differentiation (GO:0045577)	2/15	0.0505846	0.60031	5.46448	16.3066	PPP2R3C;ZFP36L2
transport along microtubule (GO:0010970)	2/15	0.0505846	0.598917	5.46448	16.3066	CDC42;DYNLL1
intracellular lipid transport (GO:0032365)	2/15	0.0505846	0.597531	5.46448	16.3066	COL4A3BP;ACACA
negative regulation of release of cytochrome c from mitochondria (GO:0090201)	2/15	0.0505846	0.596151	5.46448	16.3066	OPA1;BCL2L1
pyrimidine-containing compound metabolic process (GO:0072527)	2/15	0.0505846	0.594777	5.46448	16.3066	SLC25A19;ERH
cellular response to virus (GO:0098586)	2/15	0.0505846	0.59341	5.46448	16.3066	ARF1;GBF1
negative regulation of anoikis (GO:2000811)	2/15	0.0505846	0.592049	5.46448	16.3066	BCL2;MCL1
negative regulation of protein kinase activity (GO:0006469)	6/109	0.0508121	0.59335	2.25598	6.72196	DUSP10;CHORDC1;AKT1S1;TSC2;PAK2;PPM1F
regulation of signal transduction by p53 class mediator (GO:1901796)	7/138	0.0526419	0.613314	2.07888	6.12072	HEXIM1;RFC3;RFC4;CDK5;TAF12;RPA1;ATRIP
regulation of epidermal growth factor receptor signaling pathway (GO:0042058)	4/58	0.0529399	0.615382	2.82646	8.30581	CDC42;HGS;SHC1;EGFR
regulation of mitochondrial membrane potential (GO:0051881)	3/35	0.0531279	0.616163	3.51288	10.3105	BCL2;NDUFS1;BCL2L1
positive regulation of telomerase activity (GO:0051973)	3/35	0.0531279	0.614766	3.51288	10.3105	HSP90AB1;PTGES3;MAPK3
protein kinase B signaling (GO:0043491)	3/35	0.0531279	0.613375	3.51288	10.3105	SETX;AKT1S1;TSC2
cellular response to growth factor stimulus (GO:0071363)	7/139	0.0543276	0.62581	2.06392	6.01163	SETX;SHC1;ERBB2;IQGAP1;ZFP36L2;EGFR;BMPR1A
regulation of protein metabolic process (GO:0051246)	4/59	0.0557428	0.640665	2.77855	8.02169	TRAF3;HGS;SPOP;VPS35
dicarboxylic acid metabolic process (GO:0043648)	4/59	0.0557428	0.639226	2.77855	8.02169	GOT2;OGDH;DLST;SDHA
protein modification by small protein removal (GO:0070646)	11/261	0.0562232	0.643289	1.72728	4.97184	TADA2B;USP8;PSMC3;HGS;TRAF3;USP34;KEAP1;HIF1A;SENP3;BAP1;SENP1
regulation of type I interferon production (GO:0032479)	5/85	0.056875	0.649291	2.4108	6.91152	CREBBP;TRAF3;DHX36;PCBP2;DDX41
peptidyl-threonine dephosphorylation (GO:0035970)	2/16	0.0568995	0.64812	5.12295	14.6848	DUSP10;PPM1F
C21-steroid hormone biosynthetic process (GO:0006700)	2/16	0.0568995	0.646677	5.12295	14.6848	FDX1;TSPO
DNA strand elongation involved in DNA replication (GO:0006271)	2/16	0.0568995	0.64524	5.12295	14.6848	RFC3;RFC4
regulation of cell cycle phase transition (GO:1901987)	2/16	0.0568995	0.643809	5.12295	14.6848	DDB1;TFAP4
cytoplasmic sequestering of transcription factor (GO:0042994)	2/16	0.0568995	0.642385	5.12295	14.6848	KEAP1;CCDC22
regulation of histone H3-K4 methylation (GO:0051569)	2/16	0.0568995	0.640967	5.12295	14.6848	PAXIP1;BCOR
heme biosynthetic process (GO:0006783)	2/16	0.0568995	0.639555	5.12295	14.6848	UROD;TSPO
neuron apoptotic process (GO:0051402)	2/16	0.0568995	0.638149	5.12295	14.6848	CDK5;BCL2
regulation of steroid metabolic process (GO:0019218)	2/16	0.0568995	0.63675	5.12295	14.6848	DGKQ;STUB1
protein localization to chromatin (GO:0071168)	2/16	0.0568995	0.635357	5.12295	14.6848	MAU2;RAD21
mitochondrial fusion (GO:0008053)	2/16	0.0568995	0.633969	5.12295	14.6848	AFG3L2;OPA1
negative regulation of lipid storage (GO:0010888)	2/16	0.0568995	0.632588	5.12295	14.6848	OSBPL8;NR1H2
positive regulation of DNA-templated transcription, initiation (GO:2000144)	2/16	0.0568995	0.631213	5.12295	14.6848	SETX;PAXIP1
regulation of response to DNA damage stimulus (GO:2001020)	3/36	0.0569466	0.630365	3.4153	9.78703	SMG1;UBE2N;MCL1
mRNA catabolic process (GO:0006402)	3/36	0.0569466	0.629001	3.4153	9.78703	UPF1;CNOT10;ZFP36L2
histone deacetylation (GO:0016575)	3/36	0.0569466	0.627642	3.4153	9.78703	RBM14;SFPQ;MORF4L2
endosome organization (GO:0007032)	3/36	0.0569466	0.626289	3.4153	9.78703	USP8;VPS18;VPS11
acylglycerol metabolic process (GO:0006639)	3/36	0.0569466	0.624943	3.4153	9.78703	DGKD;DGKQ;SEL1L
apoptotic process (GO:0006915)	10/231	0.0577385	0.632274	1.77418	5.05967	DAXX;CDK5;BCL2;TSPO;TSC2;NDUFS1;DDX41;CFLAR;RTN4;BCL2L1
double-strand break repair (GO:0006302)	7/141	0.0577994	0.631586	2.03465	5.80032	SETX;SFPQ;KDM2A;PAXIP1;RAD21;UBE2N;RPA1
regulation of organelle organization (GO:0033043)	6/113	0.0585758	0.638701	2.17612	6.1746	VPS11;VPS35;PREB;TBC1D10B;CAMSAP2;MAPK3
positive regulation of kinase activity (GO:0033674)	6/113	0.0585758	0.637339	2.17612	6.1746	DAXX;ERBB2;JTB;IQGAP1;EGFR;FGFR1
response to reactive oxygen species (GO:0000302)	4/60	0.0586241	0.636508	2.73224	7.7503	TXNRD1;SOD2;EGFR;MAPK3
protein K63-linked ubiquitination (GO:0070534)	3/37	0.0608916	0.659724	3.323	9.29993	ARIH2;UBE2N;STUB1
regulation of vesicle fusion (GO:0031338)	4/61	0.0615835	0.665806	2.68745	7.49089	VPS18;VPS11;TBC1D10B;VPS16
peptidyl-lysine modification (GO:0018205)	6/115	0.0627091	0.676542	2.13828	5.92142	LIPT2;LIPT1;NUP133;LIAS;SENP3;SENP1
regulation of cellular protein catabolic process (GO:1903362)	2/17	0.0634715	0.683323	4.8216	13.2939	VPS11;VPS35
positive regulation of transcription initiation from RNA polymerase II promoter (GO:0060261)	2/17	0.0634715	0.681885	4.8216	13.2939	PAXIP1;PSMC3
positive regulation of focal adhesion assembly (GO:0051894)	2/17	0.0634715	0.680452	4.8216	13.2939	TSC1;PPM1F
N-terminal protein amino acid modification (GO:0031365)	2/17	0.0634715	0.679025	4.8216	13.2939	NAA30;NAA35
protein mannosylation (GO:0035268)	2/17	0.0634715	0.677605	4.8216	13.2939	DPM1;DPM2
histone H2A monoubiquitination (GO:0035518)	2/17	0.0634715	0.67619	4.8216	13.2939	DDB1;BCOR
positive regulation of cellular protein catabolic process (GO:1903364)	2/17	0.0634715	0.674782	4.8216	13.2939	VPS11;VPS35
embryo development ending in birth or egg hatching (GO:0009792)	2/17	0.0634715	0.673379	4.8216	13.2939	RICTOR;FGFR1
regulation of transcription from RNA polymerase I promoter (GO:0006356)	2/17	0.0634715	0.671982	4.8216	13.2939	ERBB2;UBTF
serine family amino acid metabolic process (GO:0009069)	2/17	0.0634715	0.67059	4.8216	13.2939	SEPSECS;SEPHS2
chaperone-mediated protein complex assembly (GO:0051131)	2/17	0.0634715	0.669205	4.8216	13.2939	HSP90AB1;PTGES3
positive chemotaxis (GO:0050918)	2/17	0.0634715	0.667825	4.8216	13.2939	SEMA5A;TSC2
regulation of proteasomal ubiquitin-dependent protein catabolic process (GO:0032434)	5/88	0.0641163	0.673222	2.32861	6.39683	HSP90AB1;ARIH2;KEAP1;STUB1;ARIH1
negative regulation of translation (GO:0017148)	5/88	0.0641163	0.671839	2.32861	6.39683	CNOT1;CNOT2;AGO2;TSC1;CNOT10
positive regulation of catabolic process (GO:0009896)	4/62	0.0646204	0.675733	2.6441	7.2428	DDB1;NDUFA13;TIPARP;SEC22B
regulation of macroautophagy (GO:0016241)	6/116	0.0648387	0.67663	2.11984	5.79957	CDK5;NPRL2;NPRL3;TSC2;VPS35;TSC1
homotypic cell-cell adhesion (GO:0034109)	3/38	0.0649608	0.67652	3.23555	8.8459	FIBP;GNAS;ILK
peptidyl-serine phosphorylation (GO:0018105)	7/145	0.0651462	0.67707	1.97852	5.40357	MORC3;SMG1;CDK5;DGKQ;DYRK1A;RICTOR;PAK2
protein autophosphorylation (GO:0046777)	8/175	0.0655844	0.680238	1.87354	5.10429	SMG1;WNK3;ERBB2;DYRK1A;PAK2;EGFR;FGFR1;MAPK3
negative regulation of cellular protein metabolic process (GO:0032269)	5/89	0.0666399	0.689784	2.30245	6.23607	CDK5;CNOT1;CNOT2;TSC1;CNOT10
inositol lipid-mediated signaling (GO:0048017)	3/39	0.0691516	0.714333	3.15259	8.42199	PIK3C3;PI4KB;FGFR1
acyl-CoA metabolic process (GO:0006637)	3/39	0.0691516	0.71289	3.15259	8.42199	OGDH;DLST;ACACA
protein phosphorylation (GO:0006468)	17/470	0.0700807	0.721011	1.48239	3.94034	SMG1;MORC3;DYRK1A;PIK3R4;ILK;EGFR;CLK3;CDK5;DGKQ;WNK3;ERBB2;RICTOR;PIK3C3;PAK2;FGFR1;BMPR1A;MAPK3
porphyrin-containing compound biosynthetic process (GO:0006779)	2/18	0.0702845	0.721653	4.55373	12.0911	UROD;TSPO
organelle fusion (GO:0048284)	2/18	0.0702845	0.720204	4.55373	12.0911	AFG3L2;OPA1
posttranscriptional gene silencing by RNA (GO:0035194)	2/18	0.0702845	0.718761	4.55373	12.0911	CNOT1;AGO2
endoplasmic reticulum calcium ion homeostasis (GO:0032469)	2/18	0.0702845	0.717324	4.55373	12.0911	BCAP31;BCL2
regulation of mitochondrial membrane permeability (GO:0046902)	2/18	0.0702845	0.715892	4.55373	12.0911	BCL2;BCL2L1
regulation of oxidative stress-induced intrinsic apoptotic signaling pathway (GO:1902175)	2/18	0.0702845	0.714466	4.55373	12.0911	SFPQ;SOD2
positive regulation of actin cytoskeleton reorganization (GO:2000251)	2/18	0.0702845	0.713045	4.55373	12.0911	CDC42;CDK5
negative regulation of oxidative stress-induced intrinsic apoptotic signaling pathway (GO:1902176)	2/18	0.0702845	0.71163	4.55373	12.0911	SOD2;HIF1A
regulation of epithelial cell differentiation (GO:0030856)	2/18	0.0702845	0.710221	4.55373	12.0911	CEBPB;ARNTL
snRNA metabolic process (GO:0016073)	2/18	0.0702845	0.708818	4.55373	12.0911	INTS10;RPAP2
response to organophosphorus (GO:0046683)	2/18	0.0702845	0.70742	4.55373	12.0911	RFC3;DGKQ
mRNA destabilization (GO:0061157)	2/18	0.0702845	0.706027	4.55373	12.0911	UPF1;ZFP36L2
positive regulation of cellular protein metabolic process (GO:0032270)	5/91	0.0718509	0.720344	2.25185	5.92948	NR1H2;ERBB2;VPS11;VPS35;VIM
protein-DNA complex assembly (GO:0065004)	5/91	0.0718509	0.718931	2.25185	5.92948	DDB1;DAXX;ATRX;HIST1H2BK;RPA1
negative regulation of epidermal growth factor receptor signaling pathway (GO:0042059)	3/40	0.0734617	0.733611	3.07377	8.02559	CDC42;HGS;EGFR
regulation of protein dephosphorylation (GO:0035304)	3/40	0.0734617	0.732178	3.07377	8.02559	ANKLE2;CNEP1R1;TSC1
regulation of myeloid cell differentiation (GO:0045637)	4/65	0.0741901	0.737996	2.52207	6.56021	KMT2D;CREBBP;CBFB;ASH2L
regulation of cell division (GO:0051302)	4/65	0.0741901	0.736561	2.52207	6.56021	AHCTF1;PIK3R4;PIK3C3;BCL2L1
organonitrogen compound biosynthetic process (GO:1901566)	8/181	0.0764355	0.757379	1.81143	4.65774	COL4A3BP;SPTLC1;PCYT1A;SPTLC2;GOT2;KDSR;SPTSSA;CEPT1
regulation of mitotic spindle assembly (GO:1901673)	2/19	0.0773228	0.764686	4.31406	11.043	STAG2;CHMP5
negative regulation of phosphate metabolic process (GO:0045936)	2/19	0.0773228	0.763207	4.31406	11.043	ANKLE2;DYNLL1
production of small RNA involved in gene silencing by RNA (GO:0070918)	2/19	0.0773228	0.761734	4.31406	11.043	AGO2;MRPL44
regulation of mitochondrial fission (GO:0090140)	2/19	0.0773228	0.760266	4.31406	11.043	VPS35;MARCH5
mitochondrial calcium ion homeostasis (GO:0051560)	2/19	0.0773228	0.758804	4.31406	11.043	BCAP31;AFG3L2
regulation of catenin import into nucleus (GO:0035412)	2/19	0.0773228	0.757348	4.31406	11.043	SEMA5A;EGFR
response to interferon-beta (GO:0035456)	2/19	0.0773228	0.755897	4.31406	11.043	NDUFA13;UBE2G2
positive regulation of neuron apoptotic process (GO:0043525)	2/19	0.0773228	0.754452	4.31406	11.043	CDK5;MCL1
intracellular steroid hormone receptor signaling pathway (GO:0030518)	4/66	0.0775308	0.755037	2.48385	6.35142	RBM14;DAXX;NCOA6;SAFB
positive regulation of cell division (GO:0051781)	3/41	0.0778884	0.757075	2.9988	7.65437	CDC42;CUL3;KIF23
spliceosomal complex assembly (GO:0000245)	3/41	0.0778884	0.755636	2.9988	7.65437	SETX;SRSF1;SRSF5
regulation of transcription, DNA-templated (GO:0006355)	48/1598	0.0782098	0.757315	1.23105	3.13715	KMT2D;CEBPB;NDUFA13;CBFB;THRA;SHC1;ILK;ASH2L;CHD2;HIF1A;EGFR;PPM1F;ETS2;ARNTL;CKS1B;POLR2A;ZIC2;RAD21;ERBB2;UBTF;ATXN7L3;HEXIM1;ESRRA;SREBF1;DAXX;CREBBP;CDX2;NUP133;NCOA6;NR1H2;CNBP;NFYC;ATRX;VEZF1;SAFB;SOD2;FOXP1;TADA2B;KLF6;SFPQ;TFAP4;CDK5;MED21;DGKQ;CNOT2;BHLHE40;BCOR;BLZF1
axon development (GO:0061564)	5/94	0.0800734	0.773891	2.17998	5.50404	SEMA5A;AFG3L2;CDK5;RTN4;CAMSAP2
positive regulation of endothelial cell proliferation (GO:0001938)	4/67	0.0809456	0.780842	2.44678	6.15116	SEMA5A;SIRT6;HIF1A;FGFR1
extrinsic apoptotic signaling pathway (GO:0097191)	4/67	0.0809456	0.779368	2.44678	6.15116	DAXX;BCL2;MCL1;BCL2L1
regulation of cyclin-dependent protein serine/threonine kinase activity (GO:0000079)	4/67	0.0809456	0.777901	2.44678	6.15116	HEXIM1;TFAP4;PKMYT1;CKS1B
regulation of protein localization to plasma membrane (GO:1903076)	4/67	0.0809456	0.776438	2.44678	6.15116	CDK5;WNK3;EGFR;BCL2L1
ceramide metabolic process (GO:0006672)	3/42	0.082429	0.789184	2.9274	7.30626	SPTLC1;SPTLC2;SPTSSA
cellular response to retinoic acid (GO:0071300)	3/42	0.082429	0.787706	2.9274	7.30626	SETX;NDUFA13;RARG
cholesterol metabolic process (GO:0008203)	4/68	0.0844336	0.805355	2.4108	5.95899	SNX17;CNBP;FDX1;PMVK
regulation of endoplasmic reticulum stress-induced intrinsic apoptotic signaling pathway (GO:1902235)	2/20	0.0845714	0.805164	4.09836	10.1236	OPA1;SYVN1
regulation of regulatory T cell differentiation (GO:0045589)	2/20	0.0845714	0.803664	4.09836	10.1236	DUSP10;CBFB
regulation of cholesterol transport (GO:0032374)	2/20	0.0845714	0.802171	4.09836	10.1236	NR1H2;TSPO
phosphatidylethanolamine metabolic process (GO:0046337)	2/20	0.0845714	0.800682	4.09836	10.1236	PCYT2;CEPT1
regulation of anoikis (GO:2000209)	2/20	0.0845714	0.7992	4.09836	10.1236	BCL2;MCL1
positive regulation of gene silencing by miRNA (GO:2000637)	2/20	0.0845714	0.797722	4.09836	10.1236	AGO2;EGFR
organelle disassembly (GO:1903008)	2/20	0.0845714	0.796251	4.09836	10.1236	GBF1;KLC1
entrainment of circadian clock by photoperiod (GO:0043153)	2/20	0.0845714	0.794784	4.09836	10.1236	PPP1CB;BHLHE40
positive regulation of protein metabolic process (GO:0051247)	5/96	0.0858224	0.805058	2.13456	5.24137	DDB1;NDUFA13;TIPARP;NR1H2;SEC22B
protein dephosphorylation (GO:0006470)	6/125	0.0858876	0.804191	1.96721	4.82895	PPP1CB;PPP6C;DUSP10;DUSP28;RPAP2;PPM1F
response to unfolded protein (GO:0006986)	3/43	0.0870807	0.81387	2.85932	6.97937	DNAJA1;DAXX;HSP90AB1
positive regulation of protein localization to plasma membrane (GO:1903078)	3/43	0.0870807	0.812382	2.85932	6.97937	WNK3;ACSL3;EGFR
antigen processing and presentation of exogenous peptide antigen via MHC class II (GO:0019886)	5/97	0.0887761	0.826687	2.11256	5.11585	ARF1;KIF23;KLC1;DYNLL1;SEC31A
antigen processing and presentation of exogenous peptide antigen (GO:0002478)	5/97	0.0887761	0.825182	2.11256	5.11585	ARF1;KIF23;KLC1;DYNLL1;SEC31A
positive regulation of endothelial cell migration (GO:0010595)	4/70	0.0916259	0.850122	2.34192	5.59729	SEMA5A;HIF1A;FOXP1;FGFR1
snRNA transcription (GO:0009301)	4/70	0.0916259	0.848579	2.34192	5.59729	POLR2A;ICE2;INTS10;RPAP2
snRNA transcription from RNA polymerase II promoter (GO:0042795)	4/70	0.0916259	0.847042	2.34192	5.59729	POLR2A;ICE2;INTS10;RPAP2
positive regulation of gene expression (GO:0010628)	25/771	0.0917001	0.846195	1.32891	3.17508	SHC1;ILK;HIF1A;EGFR;PPM1F;ETS2;ARNTL;CKS1B;POLR2A;ZIC2;ERBB2;VPS35;ATXN7L3;MAPK3;CREBBP;NCOA6;NR1H2;CNBP;DYRK1A;SETX;KLF6;TFAP4;HGS;DGKQ;VIM
antigen processing and presentation of peptide antigen via MHC class II (GO:0002495)	5/98	0.0917821	0.845423	2.091	4.99401	ARF1;KIF23;KLC1;DYNLL1;SEC31A
histone modification (GO:0016570)	5/98	0.0917821	0.8439	2.091	4.99401	CREBBP;RBM14;MORF4L2;UBE2N;ATXN7L3
amide biosynthetic process (GO:0043604)	3/44	0.0918409	0.842921	2.79434	6.67203	SPTLC1;SPTLC2;SPTSSA
positive regulation of macroautophagy (GO:0016239)	3/44	0.0918409	0.841407	2.79434	6.67203	SPTLC1;SPTLC2;TSC2
positive regulation of transcription from RNA polymerase I promoter (GO:0045943)	2/21	0.0920159	0.8415	3.9032	9.31223	ERBB2;UBTF
nucleotide-excision repair, preincision complex stabilization (GO:0006293)	2/21	0.0920159	0.839995	3.9032	9.31223	DDB1;RPA1
negative regulation of cyclin-dependent protein kinase activity (GO:1904030)	2/21	0.0920159	0.838495	3.9032	9.31223	HEXIM1;TFAP4
photoperiodism (GO:0009648)	2/21	0.0920159	0.837	3.9032	9.31223	PPP1CB;BHLHE40
negative regulation of cell cycle arrest (GO:0071157)	2/21	0.0920159	0.835511	3.9032	9.31223	HSP90AB1;TFAP4
protein complex subunit organization (GO:0071822)	3/45	0.0967064	0.876542	2.73224	6.38272	AFG3L2;NUP133;NDC80
peptidyl-tyrosine autophosphorylation (GO:0038083)	3/45	0.0967064	0.874988	2.73224	6.38272	DYRK1A;EGFR;MAPK3
positive regulation of cell proliferation (GO:0008284)	15/424	0.097708	0.882485	1.44989	3.37212	KMT2D;RPS9;SHC1;CUL3;CNBP;COX17;DERL2;ASH2L;SIRT6;EGFR;FGF3;FOXP1;ERBB2;FGFR1;BMPR1A
negative regulation of transcription, DNA-templated (GO:0045892)	26/813	0.0977873	0.88164	1.31067	3.04725	RARG;CEBPB;NDUFA13;THRA;SHC1;PPM1F;ETS2;ARNTL;ZIC2;E2F8;HEXIM1;DAXX;CREBBP;DMRT1;CDX2;NR1H2;CNBP;FOXP1;SFPQ;NCOR1;TFAP4;CDK5;CNOT1;CNOT2;BHLHE40;BCOR
transcription, DNA-templated (GO:0006351)	13/356	0.0980119	0.882107	1.49659	3.47609	CEBPB;CDX2;CBFB;THRA;TAF12;NCOA6;ASH2L;VEZF1;HIF1A;SETX;NCOR1;POLR2A;UBTF
regulation of interferon-gamma-mediated signaling pathway (GO:0060334)	2/22	0.0996425	0.895204	3.72578	8.59227	HSP90AB1;NR1H2
regulation of vascular endothelial growth factor receptor signaling pathway (GO:0030947)	2/22	0.0996425	0.89363	3.72578	8.59227	HGS;HIF1A
positive regulation of protein targeting to membrane (GO:0090314)	2/22	0.0996425	0.892063	3.72578	8.59227	CHORDC1;ERBB2
positive regulation of proteolysis involved in cellular protein catabolic process (GO:1903052)	2/22	0.0996425	0.8905	3.72578	8.59227	KCNE2;CCDC22
nucleotide-excision repair, DNA incision, 3'-to lesion (GO:0006295)	2/22	0.0996425	0.888943	3.72578	8.59227	DDB1;RPA1
early endosome to late endosome transport (GO:0045022)	2/22	0.0996425	0.887392	3.72578	8.59227	PIK3C3;PTPN23
negative regulation of response to endoplasmic reticulum stress (GO:1903573)	2/22	0.0996425	0.885846	3.72578	8.59227	OPA1;SYVN1
regulation of transcription from RNA polymerase III promoter (GO:0006359)	2/22	0.0996425	0.884305	3.72578	8.59227	ICE2;ERBB2
regulation of ERBB signaling pathway (GO:1901184)	2/22	0.0996425	0.88277	3.72578	8.59227	ERBB2;EGFR
C21-steroid hormone metabolic process (GO:0008207)	2/22	0.0996425	0.88124	3.72578	8.59227	FDX1;TSPO
viral genome replication (GO:0019079)	2/22	0.0996425	0.879716	3.72578	8.59227	CDC42;PCBP2
protein deubiquitination (GO:0016579)	10/257	0.0998052	0.87963	1.59469	3.67503	TADA2B;USP8;PSMC3;HGS;TRAF3;USP34;KEAP1;ATXN7L3;HIF1A;BAP1
regulation of kinase activity (GO:0043549)	5/101	0.101109	0.889589	2.02889	4.64931	NPRL2;ERBB2;SMG8;EGFR;FGFR1
RNA secondary structure unwinding (GO:0010501)	3/46	0.101675	0.893021	2.67284	6.11006	DHX36;AGO2;DDX41
nucleic acid phosphodiester bond hydrolysis (GO:0090305)	4/73	0.10294	0.902584	2.24568	5.10579	DDB1;RFC3;RFC4;RPA1
protein transport (GO:0015031)	12/326	0.104208	0.912131	1.5086	3.4115	VPS29;DSCR3;COG7;SYS1;TMED10;ATP6AP1;SNX17;TMED2;VPS35;BLZF1;TBC1D10B;SEC31A
negative regulation of cellular process (GO:0048523)	18/534	0.105467	0.921576	1.38147	3.10741	SEMA5A;RARG;NDUFA13;CUL5;TSC2;UBR2;TSC1;SOD2;MARCH5;RTN4;TFAP4;NME6;HGS;BHLHE40;BCL2;NDUFS3;VPS35;BAP1
regulation of organelle assembly (GO:1902115)	3/47	0.106742	0.931122	2.61597	5.85282	NPRL2;NPRL3;VPS11
cellular response to heat (GO:0034605)	3/47	0.106742	0.929533	2.61597	5.85282	DAXX;STUB1;IER5
positive regulation of epithelial cell migration (GO:0010634)	4/74	0.106848	0.928866	2.21533	4.95425	HIF1A;RTN4;PPM1F;FOXP1
regulation of telomere capping (GO:1904353)	2/23	0.107438	0.932407	3.56379	7.95026	SMG6;MAPK3
TOR signaling (GO:0031929)	2/23	0.107438	0.930824	3.56379	7.95026	NPRL3;AKT1S1
vesicle-mediated transport between endosomal compartments (GO:0098927)	2/23	0.107438	0.929247	3.56379	7.95026	PIK3C3;PTPN23
protein localization to Golgi apparatus (GO:0034067)	2/23	0.107438	0.927674	3.56379	7.95026	COG7;GBF1
autophagosome maturation (GO:0097352)	2/23	0.107438	0.926107	3.56379	7.95026	VPS33A;VPS16
positive regulation of ion transmembrane transporter activity (GO:0032414)	2/23	0.107438	0.924546	3.56379	7.95026	COX17;WNK3
regulation of cell size (GO:0008361)	2/23	0.107438	0.922989	3.56379	7.95026	RARG;AKT1S1
positive regulation of cell junction assembly (GO:1901890)	2/23	0.107438	0.921438	3.56379	7.95026	TSC1;PPM1F
negative regulation of axon extension (GO:0030517)	2/23	0.107438	0.919892	3.56379	7.95026	SEMA5A;RTN4
negative regulation of phosphorylation (GO:0042326)	4/75	0.110821	0.947273	2.18579	4.80838	ANKLE2;NPRL2;CHORDC1;DYNLL1
negative regulation of cellular amide metabolic process (GO:0034249)	4/75	0.110821	0.945689	2.18579	4.80838	CNOT1;CNOT2;TSC1;CNOT10
negative regulation of mitotic cell cycle (GO:0045930)	3/48	0.111907	0.953355	2.56148	5.60986	NME6;ZFP36L2;MAD2L1
protein K48-linked ubiquitination (GO:0070936)	3/48	0.111907	0.951766	2.56148	5.60986	ARIH2;SYVN1;UBE2G2
regulation of cell cycle arrest (GO:0071156)	3/48	0.111907	0.950182	2.56148	5.60986	HSP90AB1;TFAP4;CDK5
regulation of mitochondrion organization (GO:0010821)	3/48	0.111907	0.948604	2.56148	5.60986	SREBF1;VPS35;MARCH5
intrinsic apoptotic signaling pathway in response to DNA damage (GO:0008630)	3/48	0.111907	0.947031	2.56148	5.60986	BCL2;MCL1;BCL2L1
positive regulation of apoptotic signaling pathway (GO:2001235)	4/76	0.11486	0.970416	2.15703	4.6679	BCAP31;BCL2;PAK2;BCL2L1
hemopoiesis (GO:0030097)	4/76	0.11486	0.968812	2.15703	4.6679	NCOA6;PRRC2C;ASH2L;ZFP36L2
negative regulation of extrinsic apoptotic signaling pathway (GO:2001237)	4/76	0.11486	0.967214	2.15703	4.6679	BCL2;CFLAR;MCL1;BCL2L1
dendritic spine organization (GO:0097061)	2/24	0.115389	0.970069	3.4153	7.37515	CDC42;ARF1
Golgi to plasma membrane protein transport (GO:0043001)	2/24	0.115389	0.968474	3.4153	7.37515	SYS1;BLZF1
negative regulation of developmental growth (GO:0048640)	2/24	0.115389	0.966883	3.4153	7.37515	DUSP10;RTN4
regulation of actin filament bundle assembly (GO:0032231)	2/24	0.115389	0.965298	3.4153	7.37515	CDC42;TSC1
intrinsic apoptotic signaling pathway in response to endoplasmic reticulum stress (GO:0070059)	2/24	0.115389	0.963718	3.4153	7.37515	CEBPB;BCL2
negative regulation of cyclin-dependent protein serine/threonine kinase activity (GO:0045736)	2/24	0.115389	0.962144	3.4153	7.37515	HEXIM1;TFAP4
positive regulation of dephosphorylation (GO:0035306)	2/24	0.115389	0.960574	3.4153	7.37515	ANKLE2;CNEP1R1
non-recombinational repair (GO:0000726)	3/49	0.117164	0.973763	2.5092	5.38017	KDM2A;PAXIP1;UBE2N
regulation of megakaryocyte differentiation (GO:0045652)	3/49	0.117164	0.972179	2.5092	5.38017	KMT2D;CBFB;ASH2L
protein autoubiquitination (GO:0051865)	3/49	0.117164	0.970601	2.5092	5.38017	STUB1;MARCH5;RNF185
establishment of protein localization to mitochondrion (GO:0072655)	3/49	0.117164	0.969028	2.5092	5.38017	NDUFB8;TSPO;TIMM23
positive regulation of epithelial cell proliferation (GO:0050679)	5/107	0.121111	1	1.91512	4.04291	SEMA5A;ERBB2;HIF1A;RTN4;EGFR
regulation of cellular protein metabolic process (GO:0032268)	3/50	0.122513	1	2.45902	5.1628	NR1H2;VPS35;TSC1
double-strand break repair via nonhomologous end joining (GO:0006303)	3/50	0.122513	1	2.45902	5.1628	KDM2A;PAXIP1;UBE2N
negative regulation of cell communication (GO:0010648)	4/78	0.123128	1	2.10172	4.40213	BRAP;ERBB2;EGFR;FGFR1
peptidyl-serine modification (GO:0018209)	7/170	0.123195	1	1.68756	3.53373	MORC3;SMG1;CDK5;DGKQ;DYRK1A;RICTOR;PAK2
organophosphate ester transport (GO:0015748)	2/25	0.123485	1	3.27869	6.85783	OSBPL8;SLC25A19
regulation of spindle assembly (GO:0090169)	2/25	0.123485	1	3.27869	6.85783	STAG2;CHMP5
positive regulation of phosphatidylinositol 3-kinase activity (GO:0043552)	2/25	0.123485	1	3.27869	6.85783	PIK3R4;AMBRA1
respiratory chain complex IV assembly (GO:0008535)	2/25	0.123485	1	3.27869	6.85783	COX17;COX11
prostaglandin metabolic process (GO:0006693)	2/25	0.123485	1	3.27869	6.85783	ABHD16A;PTGES3
RNA splicing, via transesterification reactions (GO:0000375)	2/25	0.123485	1	3.27869	6.85783	DBR1;LSM1
response to alcohol (GO:0097305)	2/25	0.123485	1	3.27869	6.85783	PMVK;GOT2
long-chain fatty acid transport (GO:0015909)	2/25	0.123485	1	3.27869	6.85783	ACSL3;ACACA
negative regulation of insulin receptor signaling pathway (GO:0046627)	2/25	0.123485	0.998641	3.27869	6.85783	TSC2;TSC1
regulation of nervous system development (GO:0051960)	2/25	0.123485	0.997061	3.27869	6.85783	RTN4;ARNTL
peptidyl-tyrosine dephosphorylation (GO:0035335)	2/25	0.123485	0.995486	3.27869	6.85783	DUSP10;DUSP28
signal transduction in response to DNA damage (GO:0042770)	2/25	0.123485	0.993915	3.27869	6.85783	PAXIP1;ATRX
regulation of autophagy (GO:0010506)	8/203	0.124846	1	1.61512	3.36054	SREBF1;CDK5;NPRL2;BCL2;VPS35;DEPDC5;EIF4G2;MCL1
peptidyl-tyrosine phosphorylation (GO:0018108)	4/79	0.127354	1	2.07512	4.27637	DYRK1A;EGFR;MAPK3;FGFR1
steroid biosynthetic process (GO:0006694)	4/79	0.127354	1	2.07512	4.27637	FDX1;PMVK;TSPO;HSD17B4
peptidyl-tyrosine modification (GO:0018212)	3/51	0.127949	1	2.4108	4.95691	DYRK1A;EGFR;FGFR1
response to organonitrogen compound (GO:0010243)	3/51	0.127949	1	2.4108	4.95691	SEL1L;SYVN1;RNF185
circulatory system development (GO:0072359)	5/109	0.128161	1	1.87998	3.86236	RARG;NCOA6;TSC2;SMG9;BCOR
positive regulation of cysteine-type endopeptidase activity involved in apoptotic process (GO:0043280)	5/109	0.128161	1	1.87998	3.86236	BCAP31;NDUFA13;CFLAR;PPM1F;SENP1
regulation of cellular component organization (GO:0051128)	6/140	0.128261	1	1.75644	3.60718	SNX17;TSC2;FITM2;BLZF1;BAP1;CAMSAP2
negative regulation of nucleic acid-templated transcription (GO:1903507)	15/444	0.12892	1	1.38458	2.8364	HEXIM1;DAXX;NDUFA13;THRA;SHC1;NR1H2;PPM1F;FOXP1;ARNTL;SFPQ;TFAP4;CDK5;ZIC2;BHLHE40;BCOR
regulation of phosphatidylinositol 3-kinase signaling (GO:0014066)	4/80	0.131641	1	2.04918	4.15507	TSC2;EGFR;MAPK3;FGFR1
response to growth factor (GO:0070848)	2/26	0.131712	1	3.15259	6.39072	SHC1;ERBB2
lipid modification (GO:0030258)	2/26	0.131712	1	3.15259	6.39072	DGKD;DGKQ
internal peptidyl-lysine acetylation (GO:0018393)	2/26	0.131712	1	3.15259	6.39072	CREBBP;MORF4L2
negative regulation of cellular response to insulin stimulus (GO:1900077)	2/26	0.131712	1	3.15259	6.39072	TSC2;TSC1
regulation of microtubule-based process (GO:0032886)	2/26	0.131712	1	3.15259	6.39072	ERBB2;KLHL42
GPI anchor metabolic process (GO:0006505)	2/26	0.131712	1	3.15259	6.39072	DPM1;DPM2
positive regulation of establishment of protein localization to mitochondrion (GO:1903749)	5/110	0.131755	1	1.86289	3.77573	VPS11;BCL2;ARIH2;DYNLL1;BAP1
positive regulation of mitotic cell cycle (GO:0045931)	3/52	0.133469	1	2.36444	4.76172	DMRT1;NDC80;MAD2L1
positive regulation of phosphorylation (GO:0042327)	8/208	0.137675	1	1.57629	3.12556	DAXX;PTGES3;ERBB2;ILK;HIF1A;EGFR;FGFR1;MAPK3
negative regulation of cholesterol storage (GO:0010887)	1/6	0.137771	1	6.8306	13.5394	NR1H2
hindlimb morphogenesis (GO:0035137)	1/6	0.137771	1	6.8306	13.5394	RARG
granzyme-mediated apoptotic signaling pathway (GO:0008626)	1/6	0.137771	1	6.8306	13.5394	UBE4B
response to granulocyte macrophage colony-stimulating factor (GO:0097012)	1/6	0.137771	1	6.8306	13.5394	ZFP36L2
negative regulation of transforming growth factor beta production (GO:0071635)	1/6	0.137771	1	6.8306	13.5394	HSP90AB1
positive regulation of hormone metabolic process (GO:0032352)	1/6	0.137771	1	6.8306	13.5394	HIF1A
vitamin K metabolic process (GO:0042373)	1/6	0.137771	1	6.8306	13.5394	UBIAD1
intracellular pH elevation (GO:0051454)	1/6	0.137771	1	6.8306	13.5394	BCL2
SRP-dependent cotranslational protein targeting to membrane, translocation (GO:0006616)	1/6	0.137771	1	6.8306	13.5394	SRP72
regulation of skeletal muscle satellite cell proliferation (GO:0014842)	1/6	0.137771	1	6.8306	13.5394	CFLAR
N-terminal peptidyl-methionine acetylation (GO:0017196)	1/6	0.137771	1	6.8306	13.5394	NAA30
establishment of mitochondrion localization, microtubule-mediated (GO:0034643)	1/6	0.137771	1	6.8306	13.5394	LRPPRC
regulation of nuclear cell cycle DNA replication (GO:0033262)	1/6	0.137771	1	6.8306	13.5394	ATRX
cellular triglyceride homeostasis (GO:0035356)	1/6	0.137771	1	6.8306	13.5394	FITM2
negative regulation of meiotic cell cycle (GO:0051447)	1/6	0.137771	1	6.8306	13.5394	DMRT1
negative regulation of cytokinesis (GO:0032466)	1/6	0.137771	1	6.8306	13.5394	E2F8
ceramide transport (GO:0035627)	1/6	0.137771	1	6.8306	13.5394	COL4A3BP
negative regulation of endoplasmic reticulum calcium ion concentration (GO:0032471)	1/6	0.137771	1	6.8306	13.5394	BCAP31
negative regulation of glucocorticoid receptor signaling pathway (GO:2000323)	1/6	0.137771	1	6.8306	13.5394	ARNTL
vesicle fusion with endoplasmic reticulum-Golgi intermediate compartment (ERGIC) membrane (GO:1990668)	1/6	0.137771	1	6.8306	13.5394	SEC22B
regulation of protein targeting (GO:1903533)	1/6	0.137771	1	6.8306	13.5394	SREBF1
rRNA transport (GO:0051029)	1/6	0.137771	1	6.8306	13.5394	TSC1
positive regulation of protein acetylation (GO:1901985)	1/6	0.137771	1	6.8306	13.5394	ARNTL
azole transport (GO:0045117)	1/6	0.137771	1	6.8306	13.5394	SLC25A19
negative regulation of interferon-gamma-mediated signaling pathway (GO:0060336)	1/6	0.137771	1	6.8306	13.5394	NR1H2
negative regulation of response to interferon-gamma (GO:0060331)	1/6	0.137771	1	6.8306	13.5394	NR1H2
negative regulation of cell size (GO:0045792)	1/6	0.137771	1	6.8306	13.5394	AKT1S1
blood vessel endothelial cell proliferation involved in sprouting angiogenesis (GO:0002043)	1/6	0.137771	1	6.8306	13.5394	SEMA5A
regulation of chemokine-mediated signaling pathway (GO:0070099)	1/6	0.137771	1	6.8306	13.5394	HIF1A
regulation of interleukin-12 secretion (GO:2001182)	1/6	0.137771	1	6.8306	13.5394	FOXP1
regulation of interferon-alpha secretion (GO:1902739)	1/6	0.137771	1	6.8306	13.5394	DHX36
Golgi disassembly (GO:0090166)	1/6	0.137771	1	6.8306	13.5394	GBF1
response to UV-A (GO:0070141)	1/6	0.137771	1	6.8306	13.5394	EGFR
definitive hemopoiesis (GO:0060216)	1/6	0.137771	1	6.8306	13.5394	ZFP36L2
positive regulation of microtubule motor activity (GO:2000576)	1/6	0.137771	1	6.8306	13.5394	DYNLL1
mRNA 5'-splice site recognition (GO:0000395)	1/6	0.137771	1	6.8306	13.5394	SRSF1
positive regulation of axon guidance (GO:1902669)	1/6	0.137771	1	6.8306	13.5394	SEMA5A
positive regulation of histone phosphorylation (GO:0033129)	1/6	0.137771	1	6.8306	13.5394	MAPK3
regulation of transforming growth factor beta2 production (GO:0032909)	1/6	0.137771	1	6.8306	13.5394	HIF1A
regulation of tooth mineralization (GO:0070170)	1/6	0.137771	1	6.8306	13.5394	BCOR
retrograde transport, vesicle recycling within Golgi (GO:0000301)	1/6	0.137771	1	6.8306	13.5394	SYS1
vesicle fusion with Golgi apparatus (GO:0048280)	1/6	0.137771	1	6.8306	13.5394	SEC22B
ventricular compact myocardium morphogenesis (GO:0003223)	1/6	0.137771	1	6.8306	13.5394	BMPR1A
negative regulation of systemic arterial blood pressure (GO:0003085)	1/6	0.137771	1	6.8306	13.5394	SOD2
regulation of cortisol biosynthetic process (GO:2000064)	1/6	0.137771	1	6.8306	13.5394	DGKQ
GDP-mannose metabolic process (GO:0019673)	1/6	0.137771	1	6.8306	13.5394	PMM2
positive regulation of sodium ion transmembrane transport (GO:1902307)	1/6	0.137771	1	6.8306	13.5394	WNK3
positive regulation of interferon-alpha secretion (GO:1902741)	1/6	0.137771	1	6.8306	13.5394	DHX36
negative regulation of delayed rectifier potassium channel activity (GO:1902260)	1/6	0.137771	1	6.8306	13.5394	KCNE2
monoubiquitinated protein deubiquitination (GO:0035520)	1/6	0.137771	1	6.8306	13.5394	BAP1
negative regulation of meiotic nuclear division (GO:0045835)	1/6	0.137771	0.998642	6.8306	13.5394	DMRT1
positive regulation of oxidative stress-induced cell death (GO:1903209)	1/6	0.137771	0.997225	6.8306	13.5394	SFPQ
positive regulation of intracellular estrogen receptor signaling pathway (GO:0033148)	1/6	0.137771	0.995813	6.8306	13.5394	KMT2D
positive regulation of trophoblast cell migration (GO:1901165)	1/6	0.137771	0.994404	6.8306	13.5394	AGO2
negative regulation of cell cycle phase transition (GO:1901988)	1/6	0.137771	0.993	6.8306	13.5394	ZFP36L2
cellular response to granulocyte macrophage colony-stimulating factor stimulus (GO:0097011)	1/6	0.137771	0.991599	6.8306	13.5394	ZFP36L2
peptidyl-serine autophosphorylation (GO:0036289)	1/6	0.137771	0.990203	6.8306	13.5394	DYRK1A
long term synaptic depression (GO:0060292)	1/6	0.137771	0.98881	6.8306	13.5394	ARF1
snRNA transcription from RNA polymerase III promoter (GO:0042796)	1/6	0.137771	0.987421	6.8306	13.5394	ICE2
endoplasmic reticulum membrane organization (GO:0090158)	1/6	0.137771	0.986036	6.8306	13.5394	RTN4
regulation of osteoclast development (GO:2001204)	1/6	0.137771	0.984655	6.8306	13.5394	ATP6AP1
positive regulation of protein import into nucleus (GO:0042307)	3/53	0.13907	0.992551	2.31983	4.5765	SEMA5A;EGFR;BMPR1A
phosphatidylinositol metabolic process (GO:0046488)	5/112	0.139077	0.991217	1.82963	3.60935	ARF1;SMG1;PIK3R4;PIK3C3;PI4KB
positive regulation of lipid kinase activity (GO:0090218)	2/27	0.140061	0.996832	3.03582	5.96746	PIK3R4;AMBRA1
cristae formation (GO:0042407)	2/27	0.140061	0.995444	3.03582	5.96746	AFG3L2;ATP5O
negative regulation of microtubule polymerization or depolymerization (GO:0031111)	2/27	0.140061	0.994059	3.03582	5.96746	DYRK1A;CAMSAP2
modulation by host of viral transcription (GO:0043921)	2/27	0.140061	0.992679	3.03582	5.96746	TFAP4;PSMC3
extrinsic apoptotic signaling pathway via death domain receptors (GO:0008625)	2/27	0.140061	0.991302	3.03582	5.96746	DAXX;BCL2
regulation of protein transport (GO:0051223)	2/27	0.140061	0.989929	3.03582	5.96746	DNAJA1;CHORDC1
regulation of protein targeting to membrane (GO:0090313)	2/27	0.140061	0.98856	3.03582	5.96746	CHORDC1;ERBB2
protein targeting to vacuole (GO:0006623)	2/27	0.140061	0.987194	3.03582	5.96746	HGS;PIK3R4
negative regulation of organelle assembly (GO:1902116)	2/27	0.140061	0.985833	3.03582	5.96746	RBM14;SEC22B
regulation of protein localization to cell surface (GO:2000008)	2/27	0.140061	0.984475	3.03582	5.96746	HSP90AB1;GBF1
cellular response to topologically incorrect protein (GO:0035967)	2/27	0.140061	0.983121	3.03582	5.96746	DAXX;STUB1
regulation of anatomical structure morphogenesis (GO:0022603)	4/82	0.140389	0.984076	1.9992	3.9251	CDX2;ERBB2;FITM2;MARCH5
cellular protein complex assembly (GO:0043623)	6/144	0.141004	0.98703	1.70765	3.34523	AHCTF1;HSP90AB1;NDUFAF7;PTGES3;NDUFAF1;RTN4
positive regulation of canonical Wnt signaling pathway (GO:0090263)	5/113	0.142804	0.99826	1.81343	3.52945	USP8;PSMC3;USP34;ILK;ARNTL
regulation of apoptotic process (GO:0042981)	25/815	0.143016	0.99837	1.25717	2.44494	ANKLE2;RARG;SHC1;EGFR;RTN4;OPA1;ERBB2;PAK2;MCL1;CREBBP;CFLAR;KLHL20;SETX;DNAJA1;TFAP4;CDK5;IL2RB;WNK3;AKT1S1;BCL2;NAA35;NAA38;BCL2L1;MAD2L1;FGFR1
positive regulation of response to stimulus (GO:0048584)	3/54	0.144749	1	2.27687	4.40062	ILK;IER5;EGFR
membrane fusion (GO:0061025)	3/54	0.144749	1	2.27687	4.40062	AFG3L2;OPA1;CHORDC1
negative regulation of signaling (GO:0023057)	4/83	0.144848	1	1.97511	3.81605	BRAP;ERBB2;EGFR;FGFR1
establishment of protein localization to membrane (GO:0090150)	4/83	0.144848	1	1.97511	3.81605	SYS1;BLZF1;EGFR;SEC63
negative regulation of neuron death (GO:1901215)	4/83	0.144848	1	1.97511	3.81605	CDK5;BCL2;VPS35;SOD2
neuron projection extension (GO:1990138)	2/28	0.148519	1	2.9274	5.58268	CDK5;IQGAP1
hydrogen ion transmembrane transport (GO:1902600)	2/28	0.148519	1	2.9274	5.58268	ATP6AP1;ATP5O
negative regulation of response to DNA damage stimulus (GO:2001021)	2/28	0.148519	1	2.9274	5.58268	DYRK1A;BCL2L1
lytic vacuole organization (GO:0080171)	2/28	0.148519	1	2.9274	5.58268	VPS18;VPS11
positive regulation of phospholipid metabolic process (GO:1903727)	2/28	0.148519	1	2.9274	5.58268	PIK3R4;AMBRA1
regulation of NIK/NF-kappaB signaling (GO:1901222)	2/28	0.148519	1	2.9274	5.58268	ILK;EGFR
positive regulation of cell communication (GO:0010647)	2/28	0.148519	1	2.9274	5.58268	ILK;PTPN23
production of miRNAs involved in gene silencing by miRNA (GO:0035196)	2/28	0.148519	1	2.9274	5.58268	AGO2;MRPL44
antigen processing and presentation of peptide antigen via MHC class I (GO:0002474)	2/28	0.148519	1	2.9274	5.58268	BCAP31;SEC31A
regulation of defense response to virus by virus (GO:0050690)	2/28	0.148519	1	2.9274	5.58268	ARF1;PAK2
protein modification process (GO:0036211)	4/84	0.149362	1	1.9516	3.71073	LIPT1;UBE2N;BAP1;UBE2M
positive regulation of cysteine-type endopeptidase activity (GO:2001056)	3/55	0.150504	1	2.23547	4.23346	BCAP31;NDUFA13;PPM1F
regulation of gene silencing by RNA (GO:0060966)	3/55	0.150504	1	2.23547	4.23346	NUP133;POLR2A;AGO2
regulation of posttranscriptional gene silencing (GO:0060147)	3/55	0.150504	1	2.23547	4.23346	NUP133;POLR2A;AGO2
sphingolipid metabolic process (GO:0006665)	5/116	0.15424	1	1.76653	3.30209	COL4A3BP;SPTLC1;SPTLC2;KDSR;SPTSSA
chromatin remodeling (GO:0006338)	5/116	0.15424	1	1.76653	3.30209	TADA2B;DAXX;MORF4L2;ATRX;UBTF
chromosome organization (GO:0051276)	3/56	0.15633	1	2.19555	4.07447	DDB1;NUP133;NDC80
negative regulation of cellular catabolic process (GO:0031330)	3/56	0.15633	1	2.19555	4.07447	BCL2;EIF4G2;MCL1
nucleotide-excision repair, preincision complex assembly (GO:0006294)	2/29	0.157077	1	2.82646	5.23182	DDB1;RPA1
cortical cytoskeleton organization (GO:0030865)	2/29	0.157077	1	2.82646	5.23182	CDC42;PPP2R3C
positive regulation of transcription from RNA polymerase II promoter in response to stress (GO:0036003)	2/29	0.157077	1	2.82646	5.23182	CEBPB;HIF1A
lysosome localization (GO:0032418)	2/29	0.157077	1	2.82646	5.23182	VPS33A;MAP6D1
striated muscle tissue development (GO:0014706)	2/29	0.157077	1	2.82646	5.23182	CFLAR;NDUFV2
heart development (GO:0007507)	6/149	0.157718	1	1.65035	3.0481	RARG;NCOA6;TSC2;SMG9;BCOR;NDUFV2
intracellular sterol transport (GO:0032366)	1/7	0.158815	1	5.8548	10.7729	SERAC1
negative regulation of production of miRNAs involved in gene silencing by miRNA (GO:1903799)	1/7	0.158815	1	5.8548	10.7729	NCOR1
response to misfolded protein (GO:0051788)	1/7	0.158815	1	5.8548	10.7729	STUB1
rRNA-containing ribonucleoprotein complex export from nucleus (GO:0071428)	1/7	0.158815	1	5.8548	10.7729	TSC1
regulation of dendritic spine maintenance (GO:1902950)	1/7	0.158815	1	5.8548	10.7729	VPS35
mitral valve development (GO:0003174)	1/7	0.158815	1	5.8548	10.7729	BMPR1A
dorsal aorta development (GO:0035907)	1/7	0.158815	1	5.8548	10.7729	BMPR1A
bone cell development (GO:0098751)	1/7	0.158815	1	5.8548	10.7729	FOXP1
regulation of endothelial cell chemotaxis to fibroblast growth factor (GO:2000544)	1/7	0.158815	1	5.8548	10.7729	FGFR1
posttranslational protein targeting to endoplasmic reticulum membrane (GO:0006620)	1/7	0.158815	1	5.8548	10.7729	SEC63
cytoplasmic sequestering of NF-kappaB (GO:0007253)	1/7	0.158815	1	5.8548	10.7729	CCDC22
negative regulation of striated muscle tissue development (GO:0045843)	1/7	0.158815	1	5.8548	10.7729	FGF3
transcription-dependent tethering of RNA polymerase II gene DNA at nuclear periphery (GO:0000972)	1/7	0.158815	1	5.8548	10.7729	NUP133
negative regulation of telomere capping (GO:1904354)	1/7	0.158815	1	5.8548	10.7729	SMG6
miRNA loading onto RISC involved in gene silencing by miRNA (GO:0035280)	1/7	0.158815	1	5.8548	10.7729	AGO2
protein import into mitochondrial inner membrane (GO:0045039)	1/7	0.158815	1	5.8548	10.7729	NDUFA13
regulation of sterol transport (GO:0032371)	1/7	0.158815	1	5.8548	10.7729	TSPO
positive regulation of cyclin-dependent protein serine/threonine kinase activity involved in G1/S transition of mitotic cell cycle (GO:0031659)	1/7	0.158815	1	5.8548	10.7729	EGFR
regulation of isotype switching (GO:0045191)	1/7	0.158815	1	5.8548	10.7729	PAXIP1
retinoic acid receptor signaling pathway (GO:0048384)	1/7	0.158815	1	5.8548	10.7729	RARG
positive regulation of B cell differentiation (GO:0045579)	1/7	0.158815	1	5.8548	10.7729	PPP2R3C
positive regulation of phospholipid biosynthetic process (GO:0071073)	1/7	0.158815	1	5.8548	10.7729	ACSL3
positive regulation of ER-associated ubiquitin-dependent protein catabolic process (GO:1903071)	1/7	0.158815	1	5.8548	10.7729	BCAP31
negative regulation of protein kinase activity by regulation of protein phosphorylation (GO:0044387)	1/7	0.158815	1	5.8548	10.7729	PPM1F
establishment of protein localization to peroxisome (GO:0072663)	1/7	0.158815	1	5.8548	10.7729	PEX1
cellular response to hydroxyurea (GO:0072711)	1/7	0.158815	1	5.8548	10.7729	ATRX
cellular lipid biosynthetic process (GO:0097384)	1/7	0.158815	1	5.8548	10.7729	AGPS
regulation of transcription from RNA polymerase II promoter involved in heart development (GO:1901213)	1/7	0.158815	1	5.8548	10.7729	BMPR1A
regulation by virus of viral protein levels in host cell (GO:0046719)	1/7	0.158815	1	5.8548	10.7729	DDB1
negative regulation of cardiocyte differentiation (GO:1905208)	1/7	0.158815	1	5.8548	10.7729	EGFR
regulation of meiotic nuclear division (GO:0040020)	1/7	0.158815	1	5.8548	10.7729	DMRT1
regulation of pinocytosis (GO:0048548)	1/7	0.158815	1	5.8548	10.7729	NR1H2
regulation of glucocorticoid receptor signaling pathway (GO:2000322)	1/7	0.158815	1	5.8548	10.7729	ARNTL
thiamine-containing compound metabolic process (GO:0042723)	1/7	0.158815	1	5.8548	10.7729	SLC25A19
negative regulation of B cell apoptotic process (GO:0002903)	1/7	0.158815	1	5.8548	10.7729	FOXP1
positive regulation of sequestering of triglyceride (GO:0010890)	1/7	0.158815	1	5.8548	10.7729	FITM2
regulation of establishment of protein localization (GO:0070201)	1/7	0.158815	1	5.8548	10.7729	DNAJA1
pharyngeal arch artery morphogenesis (GO:0061626)	1/7	0.158815	1	5.8548	10.7729	BMPR1A
dorsal aorta morphogenesis (GO:0035912)	1/7	0.158815	1	5.8548	10.7729	BMPR1A
mannose metabolic process (GO:0006013)	1/7	0.158815	1	5.8548	10.7729	PMM2
regulation of anion transport (GO:0044070)	1/7	0.158815	1	5.8548	10.7729	NCOR1
adenylate cyclase-activating dopamine receptor signaling pathway (GO:0007191)	1/7	0.158815	1	5.8548	10.7729	GNAS
alditol metabolic process (GO:0019400)	1/7	0.158815	1	5.8548	10.7729	COQ2
protein maturation by iron-sulfur cluster transfer (GO:0097428)	1/7	0.158815	1	5.8548	10.7729	ISCA1
response to increased oxygen levels (GO:0036296)	1/7	0.158815	1	5.8548	10.7729	ATP6AP1
negative regulation of retinoic acid receptor signaling pathway (GO:0048387)	1/7	0.158815	1	5.8548	10.7729	CNOT1
negative regulation of cardiac muscle tissue development (GO:0055026)	1/7	0.158815	1	5.8548	10.7729	FGF3
glyoxylate metabolic process (GO:0046487)	1/7	0.158815	1	5.8548	10.7729	GOT2
regulation of protein heterodimerization activity (GO:0043497)	1/7	0.158815	1	5.8548	10.7729	BCL2
regulation of transcription involved in cell fate commitment (GO:0060850)	1/7	0.158815	1	5.8548	10.7729	CEBPB
membrane invagination (GO:0010324)	1/7	0.158815	0.999303	5.8548	10.7729	HGS
long-chain fatty acid import (GO:0044539)	1/7	0.158815	0.998072	5.8548	10.7729	ACSL3
regulation of cellular response to insulin stimulus (GO:1900076)	1/7	0.158815	0.996845	5.8548	10.7729	TSC2
protein homotetramerization (GO:0051289)	3/57	0.162225	1	2.15703	3.92314	TK1;SOD2;ACACA
response to retinoic acid (GO:0032526)	3/57	0.162225	1	2.15703	3.92314	SETX;NDUFA13;RARG
regulation of MAP kinase activity (GO:0043405)	4/87	0.163219	1	1.8843	3.41561	HGS;ERBB2;EGFR;FGFR1
regulation of actin cytoskeleton reorganization (GO:2000249)	2/30	0.165726	1	2.73224	4.91099	CDC42;CDK5
regulation of protein insertion into mitochondrial membrane involved in apoptotic signaling pathway (GO:1900739)	2/30	0.165726	1	2.73224	4.91099	BCL2;DYNLL1
negative regulation of stress-activated MAPK cascade (GO:0032873)	2/30	0.165726	1	2.73224	4.91099	DUSP10;NCOR1
replication fork processing (GO:0031297)	2/30	0.165726	1	2.73224	4.91099	ATRX;BHLHE40
positive regulation of cyclin-dependent protein serine/threonine kinase activity (GO:0045737)	2/30	0.165726	1	2.73224	4.91099	EGFR;CKS1B
cellular response to drug (GO:0035690)	2/30	0.165726	1	2.73224	4.91099	KCNE2;PPM1F
activation of protein kinase B activity (GO:0032148)	2/30	0.165726	1	2.73224	4.91099	OSBPL8;RICTOR
multivesicular body assembly (GO:0036258)	2/30	0.165726	1	2.73224	4.91099	HGS;CHMP5
protein localization to lysosome (GO:0061462)	2/30	0.165726	1	2.73224	4.91099	SZT2;HGS
positive regulation of phospholipase C activity (GO:0010863)	2/30	0.165726	1	2.73224	4.91099	EGFR;FGFR1
positive regulation of protein insertion into mitochondrial membrane involved in apoptotic signaling pathway (GO:1900740)	2/30	0.165726	1	2.73224	4.91099	BCL2;DYNLL1
brain development (GO:0007420)	5/119	0.166041	1	1.722	3.09189	RARG;THRA;ZIC2;NCOA6;SMG9
regulation of protein targeting to mitochondrion (GO:1903214)	4/88	0.167938	1	1.86289	3.3237	SREBF1;ARIH2;VPS11;BAP1
positive regulation of protein complex assembly (GO:0031334)	4/88	0.167938	1	1.86289	3.3237	DDB1;SETX;RPA1;STUB1
positive regulation of intracellular protein transport (GO:0090316)	6/152	0.168143	1	1.61777	2.8844	TMEM30A;CHORDC1;ERBB2;VPS11;ARIH2;BAP1
integrin-mediated signaling pathway (GO:0007229)	3/58	0.168186	1	2.11984	3.779	CDC42;CUL3;ILK
macromolecular complex assembly (GO:0065003)	5/120	0.170052	1	1.70765	3.02536	AFG3L2;CREBBP;TFAP4;IL2RB;NDUFAF1
regulation of neuron apoptotic process (GO:0043523)	4/89	0.172705	1	1.84196	3.2348	CDK5;AKT1S1;BCL2;SOD2
mitotic cytokinesis (GO:0000281)	3/59	0.17421	1	2.08391	3.64162	USP8;JTB;KIF23
cell junction assembly (GO:0034329)	3/59	0.17421	1	2.08391	3.64162	CDC42;LIM2;ILK
positive regulation of ubiquitin-protein transferase activity (GO:0051443)	2/31	0.174454	1	2.6441	4.61685	DCUN1D1;UBE2N
regulation of ubiquitin-protein transferase activity (GO:0051438)	2/31	0.174454	1	2.6441	4.61685	DCUN1D1;UBE2N
organelle transport along microtubule (GO:0072384)	2/31	0.174454	1	2.6441	4.61685	CDC42;LRPPRC
skeletal system morphogenesis (GO:0048705)	2/31	0.174454	1	2.6441	4.61685	RARG;FGFR1
negative regulation of extrinsic apoptotic signaling pathway via death domain receptors (GO:1902042)	2/31	0.174454	1	2.6441	4.61685	CFLAR;BCL2L1
multivesicular body organization (GO:0036257)	2/31	0.174454	1	2.6441	4.61685	HGS;CHMP5
nucleobase-containing small molecule interconversion (GO:0015949)	2/31	0.174454	1	2.6441	4.61685	NME6;TXNRD1
protein destabilization (GO:0031648)	2/31	0.174454	1	2.6441	4.61685	CREBBP;CUL3
gene silencing by miRNA (GO:0035195)	2/31	0.174454	1	2.6441	4.61685	CNOT1;AGO2
proton transport (GO:0015992)	2/31	0.174454	1	2.6441	4.61685	ATP6AP1;ATP5O
cellular protein localization (GO:0034613)	11/327	0.177859	1	1.37865	2.38061	VPS29;DSCR3;COG7;TMED10;SNX17;HGS;TMED2;VPS35;EGFR;TBC1D10B;SEC31A
regulation of stress-activated protein kinase signaling cascade (GO:0070302)	1/8	0.179347	1	5.12295	8.80343	MAPK3
late endosome to vacuole transport (GO:0045324)	1/8	0.179347	1	5.12295	8.80343	PIK3R4
positive regulation of mitochondrial calcium ion concentration (GO:0051561)	1/8	0.179347	1	5.12295	8.80343	BCAP31
stress-induced premature senescence (GO:0090400)	1/8	0.179347	1	5.12295	8.80343	ARNTL
4-hydroxyproline metabolic process (GO:0019471)	1/8	0.179347	1	5.12295	8.80343	GOT2
positive regulation of isotype switching (GO:0045830)	1/8	0.179347	1	5.12295	8.80343	PAXIP1
regulation of amyloid precursor protein catabolic process (GO:1902991)	1/8	0.179347	1	5.12295	8.80343	TMED10
negative regulation of protein homooligomerization (GO:0032463)	1/8	0.179347	1	5.12295	8.80343	PEX5
ventricular cardiac muscle cell membrane repolarization (GO:0099625)	1/8	0.179347	1	5.12295	8.80343	KCNE2
glomerular visceral epithelial cell development (GO:0072015)	1/8	0.179347	1	5.12295	8.80343	IQGAP1
positive regulation of DNA recombination (GO:0045911)	1/8	0.179347	1	5.12295	8.80343	PAXIP1
regulation of protein deacetylation (GO:0090311)	1/8	0.179347	1	5.12295	8.80343	DYRK1A
positive regulation of RNA polymerase II transcriptional preinitiation complex assembly (GO:0045899)	1/8	0.179347	1	5.12295	8.80343	PSMC3
establishment of Golgi localization (GO:0051683)	1/8	0.179347	1	5.12295	8.80343	CDC42
DNA damage induced protein phosphorylation (GO:0006975)	1/8	0.179347	1	5.12295	8.80343	MAPK3
regulation of cytoplasmic transport (GO:1903649)	1/8	0.179347	1	5.12295	8.80343	MAPK3
regulation of transcription from RNA polymerase II promoter in response to oxidative stress (GO:0043619)	1/8	0.179347	1	5.12295	8.80343	HIF1A
negative regulation of voltage-gated potassium channel activity (GO:1903817)	1/8	0.179347	1	5.12295	8.80343	KCNE2
deadenylation-dependent decapping of nuclear-transcribed mRNA (GO:0000290)	1/8	0.179347	1	5.12295	8.80343	LSM1
positive regulation of protein localization to cell surface (GO:2000010)	1/8	0.179347	1	5.12295	8.80343	HSP90AB1
response to hydroxyurea (GO:0072710)	1/8	0.179347	1	5.12295	8.80343	ATRX
regulation of metaphase/anaphase transition of cell cycle (GO:1902099)	1/8	0.179347	1	5.12295	8.80343	CDC23
negative regulation of centriole replication (GO:0046600)	1/8	0.179347	1	5.12295	8.80343	RBM14
negative regulation of establishment of protein localization (GO:1904950)	1/8	0.179347	1	5.12295	8.80343	DNAJA1
protein localization to endosome (GO:0036010)	1/8	0.179347	1	5.12295	8.80343	TMEM30A
regulation of type B pancreatic cell development (GO:2000074)	1/8	0.179347	1	5.12295	8.80343	ARNTL
amyloid precursor protein catabolic process (GO:0042987)	1/8	0.179347	1	5.12295	8.80343	DYRK1A
positive regulation of regulatory T cell differentiation (GO:0045591)	1/8	0.179347	1	5.12295	8.80343	DUSP10
positive regulation of immunoglobulin mediated immune response (GO:0002891)	1/8	0.179347	1	5.12295	8.80343	PAXIP1
positive regulation of monocyte differentiation (GO:0045657)	1/8	0.179347	1	5.12295	8.80343	ACIN1
ventricular trabecula myocardium morphogenesis (GO:0003222)	1/8	0.179347	1	5.12295	8.80343	BMPR1A
glomerular epithelial cell development (GO:0072310)	1/8	0.179347	1	5.12295	8.80343	IQGAP1
monocyte activation (GO:0042117)	1/8	0.179347	1	5.12295	8.80343	FOXP1
peroxisomal transport (GO:0043574)	1/8	0.179347	1	5.12295	8.80343	PEX1
regulation of ERAD pathway (GO:1904292)	1/8	0.179347	1	5.12295	8.80343	TMEM259
positive regulation of production of miRNAs involved in gene silencing by miRNA (GO:1903800)	1/8	0.179347	1	5.12295	8.80343	EGFR
positive regulation of chromatin silencing (GO:0031937)	1/8	0.179347	1	5.12295	8.80343	SIRT6
positive regulation of lipoprotein lipase activity (GO:0051006)	1/8	0.179347	1	5.12295	8.80343	NR1H2
peptidyl-lysine acetylation (GO:0018394)	1/8	0.179347	1	5.12295	8.80343	CREBBP
regulation of dopamine receptor signaling pathway (GO:0060159)	1/8	0.179347	1	5.12295	8.80343	VPS35
phosphatidylinositol-3-phosphate biosynthetic process (GO:0036092)	1/8	0.179347	1	5.12295	8.80343	PIK3C3
peptidyl-lysine monomethylation (GO:0018026)	1/8	0.179347	1	5.12295	8.80343	SETD4
histone H3-K36 demethylation (GO:0070544)	1/8	0.179347	1	5.12295	8.80343	KDM2A
succinate metabolic process (GO:0006105)	1/8	0.179347	1	5.12295	8.80343	SDHA
nucleosome assembly (GO:0006334)	3/60	0.180294	1	2.04918	3.51059	DAXX;ATRX;HIST1H2BK
regulation of stress fiber assembly (GO:0051492)	3/60	0.180294	1	2.04918	3.51059	CDC42;TSC1;PPM1F
ribonucleoprotein complex assembly (GO:0022618)	6/156	0.182477	1	1.57629	2.68148	SETX;HSP90AB1;PTGES3;SRSF1;SRSF5;SNRPB
dendrite morphogenesis (GO:0048813)	2/32	0.183255	1	2.56148	4.34651	CDC42;MAP6D1
protein deacetylation (GO:0006476)	2/32	0.183255	1	2.56148	4.34651	RBM14;MORF4L2
phosphatidylcholine biosynthetic process (GO:0006656)	2/32	0.183255	1	2.56148	4.34651	PCYT1A;CEPT1
GPI anchor biosynthetic process (GO:0006506)	2/32	0.183255	1	2.56148	4.34651	DPM1;DPM2
negative regulation of fat cell differentiation (GO:0045599)	2/32	0.183255	1	2.56148	4.34651	ZFP36L2;ARNTL
global genome nucleotide-excision repair (GO:0070911)	2/32	0.183255	1	2.56148	4.34651	DDB1;UBE2N
protein targeting to membrane (GO:0006612)	3/61	0.186434	1	2.01559	3.38554	PEX3;PEX5;SEC63
positive regulation of cellular metabolic process (GO:0031325)	4/92	0.187278	1	1.7819	2.98496	LIPT2;NR1H2;HIF1A;ACACA
negative regulation of mitochondrion organization (GO:0010823)	2/33	0.192118	1	2.48385	4.09749	OPA1;BCL2L1
positive regulation of calcium ion transport (GO:0051928)	2/33	0.192118	1	2.48385	4.09749	P2RX2;WNK3
regulation of cell-substrate adhesion (GO:0010810)	2/33	0.192118	1	2.48385	4.09749	TSC1;PPM1F
positive regulation of cell-matrix adhesion (GO:0001954)	2/33	0.192118	1	2.48385	4.09749	TSC1;PPM1F
intra-Golgi vesicle-mediated transport (GO:0006891)	2/33	0.192118	1	2.48385	4.09749	COG6;COG5
transcription initiation from RNA polymerase I promoter (GO:0006361)	2/33	0.192118	1	2.48385	4.09749	UBTF;MAPK3
exonucleolytic nuclear-transcribed mRNA catabolic process involved in deadenylation-dependent decay (GO:0043928)	2/33	0.192118	1	2.48385	4.09749	LSM7;LSM1
transcription from RNA polymerase I promoter (GO:0006360)	2/33	0.192118	1	2.48385	4.09749	UBTF;MAPK3
regulation of phosphatidylinositol 3-kinase activity (GO:0043551)	2/33	0.192118	1	2.48385	4.09749	PIK3R4;AMBRA1
positive regulation of locomotion (GO:0040017)	2/33	0.192118	1	2.48385	4.09749	DDB1;PPM1F
positive regulation of type I interferon production (GO:0032481)	3/62	0.192628	1	1.98308	3.26612	CREBBP;DHX36;DDX41
regulation of actin filament-based process (GO:0032970)	3/62	0.192628	1	1.98308	3.26612	CDC42;TSC1;RICTOR
regulation of translational initiation (GO:0006446)	3/62	0.192628	1	1.98308	3.26612	EIF5B;AGO2;EIF4G2
regulation of cell proliferation (GO:0042127)	22/740	0.198291	1	1.21843	1.97144	KMT2D;RARG;RPS9;CUL5;SHC1;CUL3;CNBP;COX17;DERL2;TSC2;ASH2L;TSC1;SOD2;EGFR;FGF3;TFAP4;HGS;BHLHE40;IER5;BAP1;BMPR1A;FGFR1
regulation of proteolysis (GO:0030162)	3/63	0.198872	1	1.9516	3.15201	CDK5;TRAF3;SPOP
negative regulation of neuron apoptotic process (GO:0043524)	3/63	0.198872	1	1.9516	3.15201	BCL2;SOD2;HIF1A
negative regulation of response to stimulus (GO:0048585)	5/127	0.199136	1	1.61353	2.60385	BRAP;NCOR1;ERBB2;EGFR;FGFR1
negative regulation of circadian rhythm (GO:0042754)	1/9	0.199379	1	4.55373	7.34311	SFPQ
removal of superoxide radicals (GO:0019430)	1/9	0.199379	1	4.55373	7.34311	SOD2
small RNA loading onto RISC (GO:0070922)	1/9	0.199379	1	4.55373	7.34311	AGO2
dynamin family protein polymerization involved in membrane fission (GO:0003373)	1/9	0.199379	1	4.55373	7.34311	OPA1
regulation of protein acetylation (GO:1901983)	1/9	0.199379	1	4.55373	7.34311	ARNTL
positive regulation of voltage-gated potassium channel activity (GO:1903818)	1/9	0.199379	1	4.55373	7.34311	ALG10B
poly-N-acetyllactosamine biosynthetic process (GO:0030311)	1/9	0.199379	1	4.55373	7.34311	B3GNT2
anoikis (GO:0043276)	1/9	0.199379	1	4.55373	7.34311	TSC2
regulation of interleukin-1 secretion (GO:0050704)	1/9	0.199379	1	4.55373	7.34311	FOXP1
negative regulation of mitotic nuclear division (GO:0045839)	1/9	0.199379	1	4.55373	7.34311	NME6
sterol catabolic process (GO:0016127)	1/9	0.199379	1	4.55373	7.34311	SNX17
potassium ion export (GO:0071435)	1/9	0.199379	1	4.55373	7.34311	KCNE2
vasodilation (GO:0042311)	1/9	0.199379	1	4.55373	7.34311	SOD2
regulation of ER-associated ubiquitin-dependent protein catabolic process (GO:1903069)	1/9	0.199379	1	4.55373	7.34311	BCAP31
regulation of endothelial cell differentiation (GO:0045601)	1/9	0.199379	1	4.55373	7.34311	VEZF1
cellular response to dopamine (GO:1903351)	1/9	0.199379	1	4.55373	7.34311	MAPK3
regulation of morphogenesis of an epithelium (GO:1905330)	1/9	0.199379	1	4.55373	7.34311	FOXP1
Cdc42 protein signal transduction (GO:0032488)	1/9	0.199379	1	4.55373	7.34311	CDC42
positive regulation of ion transmembrane transport (GO:0034767)	1/9	0.199379	1	4.55373	7.34311	WNK3
peptidyl-arginine omega-N-methylation (GO:0035247)	1/9	0.199379	1	4.55373	7.34311	NDUFAF7
response to dopamine (GO:1903350)	1/9	0.199379	1	4.55373	7.34311	MAPK3
response to leucine (GO:0043201)	1/9	0.199379	1	4.55373	7.34311	UBR2
virion attachment to host cell (GO:0019062)	1/9	0.199379	1	4.55373	7.34311	HSP90AB1
negative regulation of phosphatidylinositol 3-kinase signaling (GO:0014067)	1/9	0.199379	1	4.55373	7.34311	TSC2
regulation of skeletal muscle cell differentiation (GO:2001014)	1/9	0.199379	1	4.55373	7.34311	ARNTL
columnar/cuboidal epithelial cell differentiation (GO:0002065)	1/9	0.199379	1	4.55373	7.34311	CDX2
mitochondrial calcium uptake (GO:0036444)	1/9	0.199379	1	4.55373	7.34311	AFG3L2
cellular response to oxygen levels (GO:0071453)	1/9	0.199379	1	4.55373	7.34311	ATP6AP1
negative regulation of histone methylation (GO:0031061)	1/9	0.199379	1	4.55373	7.34311	BCOR
protein localization to vacuole (GO:0072665)	1/9	0.199379	1	4.55373	7.34311	SZT2
oogenesis (GO:0048477)	1/9	0.199379	1	4.55373	7.34311	KMT2D
mitochondrial protein processing (GO:0034982)	1/9	0.199379	1	4.55373	7.34311	AFG3L2
negative regulation of lymphocyte apoptotic process (GO:0070229)	1/9	0.199379	1	4.55373	7.34311	FOXP1
cellular response to superoxide (GO:0071451)	1/9	0.199379	1	4.55373	7.34311	SOD2
negative regulation of vascular endothelial growth factor receptor signaling pathway (GO:0030948)	1/9	0.199379	1	4.55373	7.34311	HGS
protein autoprocessing (GO:0016540)	1/9	0.199379	1	4.55373	7.34311	AFG3L2
cholesterol catabolic process (GO:0006707)	1/9	0.199379	1	4.55373	7.34311	SNX17
ether lipid metabolic process (GO:0046485)	1/9	0.199379	1	4.55373	7.34311	AGPS
regulation of hair cycle (GO:0042634)	1/9	0.199379	1	4.55373	7.34311	ARNTL
B cell homeostasis (GO:0001782)	1/9	0.199379	1	4.55373	7.34311	PPP2R3C
cellular response to leucine (GO:0071233)	1/9	0.199379	1	4.55373	7.34311	UBR2
negative regulation of lipid localization (GO:1905953)	1/9	0.199379	1	4.55373	7.34311	NR1H2
mitral valve morphogenesis (GO:0003183)	1/9	0.199379	1	4.55373	7.34311	BMPR1A
dynamin family protein polymerization involved in mitochondrial fission (GO:0003374)	1/9	0.199379	1	4.55373	7.34311	OPA1
cellular response to acidic pH (GO:0071468)	1/9	0.199379	1	4.55373	7.34311	CHORDC1
negative regulation of microtubule polymerization (GO:0031115)	1/9	0.199379	1	4.55373	7.34311	DYRK1A
neuron projection organization (GO:0106027)	1/9	0.199379	1	4.55373	7.34311	ARF1
mitochondrial fragmentation involved in apoptotic process (GO:0043653)	1/9	0.199379	1	4.55373	7.34311	VPS35
lipoprotein biosynthetic process (GO:0042158)	1/9	0.199379	1	4.55373	7.34311	PIK3C3
establishment of epithelial cell apical/basal polarity (GO:0045198)	1/9	0.199379	1	4.55373	7.34311	CDC42
positive regulation of triglyceride lipase activity (GO:0061365)	1/9	0.199379	1	4.55373	7.34311	NR1H2
Golgi inheritance (GO:0048313)	1/9	0.199379	1	4.55373	7.34311	GBF1
embryonic limb morphogenesis (GO:0030326)	2/34	0.201035	1	2.4108	3.86759	RARG;CREBBP
positive regulation of exocytosis (GO:0045921)	2/34	0.201035	1	2.4108	3.86759	ATP6AP1;HGS
regulation of JUN kinase activity (GO:0043506)	2/34	0.201035	1	2.4108	3.86759	DNAJA1;DUSP10
bone development (GO:0060348)	2/34	0.201035	1	2.4108	3.86759	RARG;GNAS
regulation of insulin receptor signaling pathway (GO:0046626)	2/34	0.201035	1	2.4108	3.86759	TSC2;TSC1
endoplasmic reticulum organization (GO:0007029)	2/34	0.201035	1	2.4108	3.86759	RTN4;SEC31A
regulation of cytoskeleton organization (GO:0051493)	4/95	0.20223	1	1.72563	2.75815	CDC42;TSC1;RICTOR;MAPK3
regulation of mRNA stability (GO:0043488)	5/128	0.203425	1	1.60092	2.5494	CARHSP1;FASTKD1;PSMC3;VIM;ZFP36L2
positive regulation of mitochondrion organization (GO:0010822)	5/128	0.203425	1	1.60092	2.5494	VPS11;ARIH2;VPS35;MARCH5;BAP1
cellular response to decreased oxygen levels (GO:0036294)	3/64	0.205165	1	1.92111	3.04292	TSC1;STUB1;HIF1A
protein localization to nucleus (GO:0034504)	4/96	0.207291	1	1.70765	2.68721	MORC3;NUP133;CNEP1R1;TSC2
regulation of cell death (GO:0010941)	4/96	0.207291	1	1.70765	2.68721	CHORDC1;RRAS2;VPS35;TSC1
neuron projection morphogenesis (GO:0048812)	6/163	0.208661	1	1.5086	2.36404	CDC42;AFG3L2;CDK5;MAP6D1;IQGAP1;RTN4
positive regulation of protein phosphorylation (GO:0001934)	13/412	0.209168	1	1.29317	2.02332	DAXX;SHC1;ILK;IQGAP1;EGFR;DGKQ;WNK3;ERBB2;JTB;PAK2;FGFR1;BMPR1A;MAPK3
positive regulation of NIK/NF-kappaB signaling (GO:1901224)	2/35	0.209999	1	2.34192	3.65492	ILK;EGFR
nuclear-transcribed mRNA catabolic process, exonucleolytic (GO:0000291)	2/35	0.209999	1	2.34192	3.65492	LSM7;LSM1
regulation of microtubule polymerization (GO:0031113)	2/35	0.209999	1	2.34192	3.65492	DYRK1A;CAMSAP2
anatomical structure homeostasis (GO:0060249)	2/35	0.209999	1	2.34192	3.65492	PTGES3;RPA1
positive regulation of DNA replication (GO:0045740)	2/35	0.209999	1	2.34192	3.65492	SHC1;EGFR
negative regulation of protein complex assembly (GO:0031333)	2/35	0.209999	1	2.34192	3.65492	CDC42;THRA
negative regulation of epithelial cell migration (GO:0010633)	2/35	0.209999	1	2.34192	3.65492	DUSP10;PTPN23
regulation of mitotic spindle organization (GO:0060236)	2/35	0.209999	1	2.34192	3.65492	STAG2;CHMP5
cholesterol biosynthetic process (GO:0006695)	2/35	0.209999	1	2.34192	3.65492	CNBP;PMVK
regulation of phosphoprotein phosphatase activity (GO:0043666)	2/35	0.209999	1	2.34192	3.65492	HSP90AB1;TSC1
DNA-dependent DNA replication maintenance of fidelity (GO:0045005)	2/35	0.209999	1	2.34192	3.65492	ATRX;BHLHE40
positive regulation of osteoblast differentiation (GO:0045669)	2/35	0.209999	1	2.34192	3.65492	ATP6AP1;BMPR1A
chromatin assembly (GO:0031497)	3/65	0.211502	1	1.89155	2.93856	DAXX;ATRX;HIST1H2BK
positive regulation of protein modification by small protein conjugation or removal (GO:1903322)	3/65	0.211502	1	1.89155	2.93856	PAXIP1;CUL3;STUB1
cellular response to reactive oxygen species (GO:0034614)	3/65	0.211502	1	1.89155	2.93856	SETX;EGFR;MAPK3
DNA synthesis involved in DNA repair (GO:0000731)	3/65	0.211502	1	1.89155	2.93856	RFC3;RFC4;RPA1
fatty acid catabolic process (GO:0009062)	3/65	0.211502	1	1.89155	2.93856	ABHD16A;ACAD9;HSD17B4
cell morphogenesis involved in neuron differentiation (GO:0048667)	4/97	0.212389	1	1.69005	2.61845	AFG3L2;CDK5;MAP6D1;RTN4
protein targeting to ER (GO:0045047)	4/97	0.212389	1	1.69005	2.61845	RPS9;SRP72;PMM2;SEC63
purine ribonucleotide metabolic process (GO:0009150)	3/66	0.217882	1	1.86289	2.83868	OPA1;NDUFAF7;NDUFS1
positive regulation of cellular protein localization (GO:1903829)	3/66	0.217882	1	1.86289	2.83868	HSP90AB1;RTN4;NDC80
regulation of B cell apoptotic process (GO:0002902)	1/10	0.218923	1	4.09836	6.22555	FOXP1
regulation of phospholipase C activity (GO:1900274)	1/10	0.218923	1	4.09836	6.22555	FGFR1
thyroid gland development (GO:0030878)	1/10	0.218923	1	4.09836	6.22555	THRA
mitotic spindle midzone assembly (GO:0051256)	1/10	0.218923	1	4.09836	6.22555	KIF23
negative regulation of oxidative stress-induced neuron death (GO:1903204)	1/10	0.218923	1	4.09836	6.22555	HIF1A
regulation of mammary gland epithelial cell proliferation (GO:0033599)	1/10	0.218923	1	4.09836	6.22555	RTN4
energy coupled proton transmembrane transport, against electrochemical gradient (GO:0015988)	1/10	0.218923	1	4.09836	6.22555	NDUFS7
regulation of attachment of spindle microtubules to kinetochore (GO:0051988)	1/10	0.218923	1	4.09836	6.22555	CDC42
regulation of Arp2/3 complex-mediated actin nucleation (GO:0034315)	1/10	0.218923	1	4.09836	6.22555	ARF1
mitotic nuclear envelope reassembly (GO:0007084)	1/10	0.218923	1	4.09836	6.22555	ANKLE2
regulation of platelet-derived growth factor receptor signaling pathway (GO:0010640)	1/10	0.218923	1	4.09836	6.22555	HGS
response to acidic pH (GO:0010447)	1/10	0.218923	1	4.09836	6.22555	CHORDC1
contractile actin filament bundle assembly (GO:0030038)	1/10	0.218923	1	4.09836	6.22555	CUL3
galactose metabolic process (GO:0006012)	1/10	0.218923	1	4.09836	6.22555	SLC35A2
positive regulation of bone remodeling (GO:0046852)	1/10	0.218923	1	4.09836	6.22555	ATP6AP1
aspartate family amino acid metabolic process (GO:0009066)	1/10	0.218923	1	4.09836	6.22555	GOT2
positive regulation of glucose import in response to insulin stimulus (GO:2001275)	1/10	0.218923	1	4.09836	6.22555	OSBPL8
ESCRT III complex disassembly (GO:1904903)	1/10	0.218923	1	4.09836	6.22555	CHMP5
regulation of protein exit from endoplasmic reticulum (GO:0070861)	1/10	0.218923	1	4.09836	6.22555	TMEM30A
RNA phosphodiester bond hydrolysis, endonucleolytic (GO:0090502)	1/10	0.218923	1	4.09836	6.22555	MRPL44
regulation of transforming growth factor beta production (GO:0071634)	1/10	0.218923	1	4.09836	6.22555	HIF1A
positive regulation of intracellular steroid hormone receptor signaling pathway (GO:0033145)	1/10	0.218923	1	4.09836	6.22555	KMT2D
positive regulation of lipase activity (GO:0060193)	1/10	0.218923	1	4.09836	6.22555	FGFR1
negative regulation of gene silencing by miRNA (GO:0060965)	1/10	0.218923	1	4.09836	6.22555	NCOR1
regulation of pH (GO:0006885)	1/10	0.218923	1	4.09836	6.22555	ATP6AP1
glycoprotein catabolic process (GO:0006516)	1/10	0.218923	1	4.09836	6.22555	EDEM2
glycerolipid metabolic process (GO:0046486)	1/10	0.218923	1	4.09836	6.22555	DGKQ
primary miRNA processing (GO:0031053)	1/10	0.218923	1	4.09836	6.22555	MRPL44
negative regulation of autophagosome assembly (GO:1902902)	1/10	0.218923	1	4.09836	6.22555	SEC22B
regulation of histone phosphorylation (GO:0033127)	1/10	0.218923	1	4.09836	6.22555	MAPK3
endosomal vesicle fusion (GO:0034058)	1/10	0.218923	1	4.09836	6.22555	VPS11
nucleoside metabolic process (GO:0009116)	1/10	0.218923	1	4.09836	6.22555	ERH
central nervous system projection neuron axonogenesis (GO:0021952)	1/10	0.218923	1	4.09836	6.22555	SZT2
positive regulation of reproductive process (GO:2000243)	1/10	0.218923	1	4.09836	6.22555	AGO2
insulin-like growth factor receptor signaling pathway (GO:0048009)	1/10	0.218923	1	4.09836	6.22555	TSC2
positive regulation of circadian rhythm (GO:0042753)	1/10	0.218923	1	4.09836	6.22555	ARNTL
IRES-dependent viral translational initiation (GO:0075522)	1/10	0.218923	1	4.09836	6.22555	PCBP2
cytochrome complex assembly (GO:0017004)	1/10	0.218923	1	4.09836	6.22555	COX11
negative regulation of centrosome duplication (GO:0010826)	1/10	0.218923	1	4.09836	6.22555	RBM14
positive regulation of bone resorption (GO:0045780)	1/10	0.218923	1	4.09836	6.22555	ATP6AP1
negative regulation of stem cell differentiation (GO:2000737)	1/10	0.218923	1	4.09836	6.22555	ZFP36L2
polarized epithelial cell differentiation (GO:0030859)	1/10	0.218923	1	4.09836	6.22555	CDC42
regulation of phospholipase activity (GO:0010517)	1/10	0.218923	1	4.09836	6.22555	FGFR1
ESCRT complex disassembly (GO:1904896)	1/10	0.218923	1	4.09836	6.22555	CHMP5
regulation of mitochondrial depolarization (GO:0051900)	1/10	0.218923	1	4.09836	6.22555	BCL2
stress fiber assembly (GO:0043149)	1/10	0.218923	1	4.09836	6.22555	CUL3
negative regulation of protein autophosphorylation (GO:0031953)	1/10	0.218923	1	4.09836	6.22555	CHORDC1
poly-N-acetyllactosamine metabolic process (GO:0030309)	1/10	0.218923	1	4.09836	6.22555	B3GNT2
T cell homeostasis (GO:0043029)	1/10	0.218923	1	4.09836	6.22555	PPP2R3C
very-low-density lipoprotein particle assembly (GO:0034379)	1/10	0.218923	1	4.09836	6.22555	ACSL3
medium-chain fatty acid metabolic process (GO:0051791)	1/10	0.218923	1	4.09836	6.22555	ACAD9
regulation of lysosomal lumen pH (GO:0035751)	1/10	0.218923	1	4.09836	6.22555	VPS33A
intracellular cholesterol transport (GO:0032367)	1/10	0.218923	1	4.09836	6.22555	SERAC1
protein acylation (GO:0043543)	2/36	0.219002	1	2.27687	3.45782	NAT6;CREBBP
regulation of nitric-oxide synthase activity (GO:0050999)	2/36	0.219002	1	2.27687	3.45782	HIF1A;EGFR
positive regulation of signaling (GO:0023056)	2/36	0.219002	1	2.27687	3.45782	ILK;PTPN23
organophosphate biosynthetic process (GO:0090407)	2/36	0.219002	1	2.27687	3.45782	PCYT2;FITM2
axonal transport (GO:0098930)	2/36	0.219002	1	2.27687	3.45782	OPA1;HIF1A
cardiac muscle tissue development (GO:0048738)	2/36	0.219002	1	2.27687	3.45782	NDUFV2;BMPR1A
secondary alcohol biosynthetic process (GO:1902653)	2/36	0.219002	1	2.27687	3.45782	CNBP;PMVK
negative regulation of transcription from RNA polymerase II promoter (GO:0000122)	17/565	0.22082	1	1.23314	1.86253	HEXIM1;CREBBP;RARG;CEBPB;DMRT1;CDX2;NR1H2;CNBP;ATRX;ETS2;SFPQ;NCOR1;CNOT1;CNOT2;BHLHE40;BCOR;E2F8
small GTPase mediated signal transduction (GO:0007264)	4/99	0.222686	1	1.6559	2.48715	BRAP;USP8;SHC1;CHORDC1
regulation of gene silencing by miRNA (GO:0060964)	3/67	0.224301	1	1.83509	2.74303	NUP133;POLR2A;AGO2
cellular response to organic substance (GO:0071310)	5/133	0.225309	1	1.54074	2.29613	SHC1;TIPARP;ERBB2;PTPN23;MAPK3
cellular response to metal ion (GO:0071248)	4/100	0.227884	1	1.63934	2.42446	DAXX;IQGAP1;EGFR;MAPK3
regulation of lipid metabolic process (GO:0019216)	4/100	0.227884	1	1.63934	2.42446	CREBBP;NCOR1;NCOA6;TXNRD1
protein monoubiquitination (GO:0006513)	2/37	0.228037	1	2.21533	3.2748	CUL3;ATXN7L3
regulation of DNA repair (GO:0006282)	2/37	0.228037	1	2.21533	3.2748	UBE2N;EGFR
positive regulation of mitochondrial outer membrane permeabilization involved in apoptotic signaling pathway (GO:1901030)	2/37	0.228037	1	2.21533	3.2748	BCL2;DYNLL1
regulation of dendrite development (GO:0050773)	2/37	0.228037	1	2.21533	3.2748	RTN4IP1;CAMSAP2
positive regulation of smooth muscle cell proliferation (GO:0048661)	2/37	0.228037	1	2.21533	3.2748	FOXP1;BMPR1A
phospholipid biosynthetic process (GO:0008654)	2/37	0.228037	1	2.21533	3.2748	PCYT2;FITM2
regulation of peptidyl-threonine phosphorylation (GO:0010799)	2/37	0.228037	1	2.21533	3.2748	DGKQ;WNK3
positive regulation of stress fiber assembly (GO:0051496)	2/37	0.228037	1	2.21533	3.2748	CDC42;PPM1F
regulation of MAPK cascade (GO:0043408)	7/203	0.228314	1	1.41323	2.08739	HGS;SHC1;ERBB2;PAK2;EGFR;FGFR1;MAPK3
positive regulation of neuron death (GO:1901216)	2/38	0.237097	1	2.15703	3.10459	DAXX;CDK5
regulation of cellular amide metabolic process (GO:0034248)	2/38	0.237097	1	2.15703	3.10459	TMED10;TSC1
positive regulation of DNA repair (GO:0045739)	2/38	0.237097	1	2.15703	3.10459	UBE2N;EGFR
regulation of histone H3-K9 methylation (GO:0051570)	1/11	0.237991	1	3.72578	5.34844	ATRX
negative regulation of defense response to virus (GO:0050687)	1/11	0.237991	1	3.72578	5.34844	PCBP2
drug transmembrane transport (GO:0006855)	1/11	0.237991	1	3.72578	5.34844	TMEM30A
regulation of trophoblast cell migration (GO:1901163)	1/11	0.237991	1	3.72578	5.34844	AGO2
negative regulation of protein localization to nucleus (GO:1900181)	1/11	0.237991	1	3.72578	5.34844	CHORDC1
intracellular protein transmembrane transport (GO:0065002)	1/11	0.237991	1	3.72578	5.34844	SRP72
embryonic eye morphogenesis (GO:0048048)	1/11	0.237991	1	3.72578	5.34844	RARG
UV-damage excision repair (GO:0070914)	1/11	0.237991	1	3.72578	5.34844	DDB1
negative regulation of bone mineralization (GO:0030502)	1/11	0.237991	1	3.72578	5.34844	BCOR
T-helper cell differentiation (GO:0042093)	1/11	0.237991	1	3.72578	5.34844	FOXP1
carnitine shuttle (GO:0006853)	1/11	0.237991	1	3.72578	5.34844	ACACA
T cell differentiation in thymus (GO:0033077)	1/11	0.237991	1	3.72578	5.34844	ZFP36L2
positive regulation of receptor biosynthetic process (GO:0010870)	1/11	0.237991	1	3.72578	5.34844	HIF1A
positive regulation of protein deacetylation (GO:0090312)	1/11	0.237991	1	3.72578	5.34844	DYRK1A
regulation of actin filament depolymerization (GO:0030834)	1/11	0.237991	1	3.72578	5.34844	SEMA5A
biotin metabolic process (GO:0006768)	1/11	0.237991	1	3.72578	5.34844	ACACA
positive regulation of transcription from RNA polymerase II promoter in response to endoplasmic reticulum stress (GO:1990440)	1/11	0.237991	1	3.72578	5.34844	CEBPB
attachment of mitotic spindle microtubules to kinetochore (GO:0051315)	1/11	0.237991	1	3.72578	5.34844	NDC80
negative regulation of myotube differentiation (GO:0010832)	1/11	0.237991	1	3.72578	5.34844	CFLAR
positive regulation of chromosome segregation (GO:0051984)	1/11	0.237991	1	3.72578	5.34844	RAD21
positive regulation of actin filament depolymerization (GO:0030836)	1/11	0.237991	1	3.72578	5.34844	SEMA5A
transcytosis (GO:0045056)	1/11	0.237991	1	3.72578	5.34844	VPS35
negative regulation of cell division (GO:0051782)	1/11	0.237991	1	3.72578	5.34844	E2F8
response to sterol (GO:0036314)	1/11	0.237991	1	3.72578	5.34844	PMVK
rhodopsin mediated signaling pathway (GO:0016056)	1/11	0.237991	1	3.72578	5.34844	RNF7
negative regulation of nucleocytoplasmic transport (GO:0046823)	1/11	0.237991	1	3.72578	5.34844	CHORDC1
macrophage differentiation (GO:0030225)	1/11	0.237991	1	3.72578	5.34844	CDC42
positive regulation of fatty acid biosynthetic process (GO:0045723)	1/11	0.237991	1	3.72578	5.34844	NR1H2
protein kinase C signaling (GO:0070528)	1/11	0.237991	1	3.72578	5.34844	DGKQ
fatty acid transmembrane transport (GO:1902001)	1/11	0.237991	1	3.72578	5.34844	ACACA
regulation of synaptic vesicle cycle (GO:0098693)	1/11	0.237991	1	3.72578	5.34844	CDK5
establishment of synaptic vesicle localization (GO:0097480)	1/11	0.237991	1	3.72578	5.34844	CDK5
cellular response to increased oxygen levels (GO:0036295)	1/11	0.237991	1	3.72578	5.34844	ATP6AP1
glycerol metabolic process (GO:0006071)	1/11	0.237991	1	3.72578	5.34844	COQ2
mitotic spindle elongation (GO:0000022)	1/11	0.237991	1	3.72578	5.34844	KIF23
cyclooxygenase pathway (GO:0019371)	1/11	0.237991	1	3.72578	5.34844	PTGES3
negative regulation of translation, ncRNA-mediated (GO:0040033)	1/11	0.237991	1	3.72578	5.34844	AGO2
regulation of receptor biosynthetic process (GO:0010869)	1/11	0.237991	1	3.72578	5.34844	HIF1A
miRNA mediated inhibition of translation (GO:0035278)	1/11	0.237991	1	3.72578	5.34844	AGO2
alcohol catabolic process (GO:0046164)	1/11	0.237991	1	3.72578	5.34844	SNX17
membrane repolarization during action potential (GO:0086011)	1/11	0.237991	1	3.72578	5.34844	KCNE2
RNA polymerase II transcriptional preinitiation complex assembly (GO:0051123)	1/11	0.237991	1	3.72578	5.34844	TAF12
positive regulation of angiogenesis (GO:0045766)	4/103	0.243653	1	1.5916	2.24735	SEMA5A;AGO2;SIRT6;HIF1A
cytoskeleton-dependent cytokinesis (GO:0061640)	3/70	0.243766	1	1.75644	2.4793	USP8;JTB;KIF23
signal transduction by p53 class mediator (GO:0072331)	2/39	0.246175	1	2.10172	2.94601	PAXIP1;ATRX
negative regulation of protein catabolic process (GO:0042177)	2/39	0.246175	1	2.10172	2.94601	EGFR;MAD2L1
regulation of extrinsic apoptotic signaling pathway via death domain receptors (GO:1902041)	2/39	0.246175	1	2.10172	2.94601	CFLAR;BCL2L1
purine ribonucleoside monophosphate metabolic process (GO:0009167)	2/39	0.246175	1	2.10172	2.94601	NDUFAF7;NDUFS1
DNA replication-independent nucleosome assembly (GO:0006336)	2/39	0.246175	1	2.10172	2.94601	ATRX;CENPN
positive regulation of nucleic acid-templated transcription (GO:1903508)	15/502	0.246734	1	1.22461	1.71377	CREBBP;SHC1;NCOA6;NR1H2;CNBP;ILK;HIF1A;EGFR;ETS2;ARNTL;CKS1B;KLF6;TFAP4;ZIC2;ATXN7L3
response to cytokine (GO:0034097)	5/138	0.247852	1	1.48491	2.07134	BCL2;PTPN23;MCL1;KLHL20;BCL2L1
recombinational repair (GO:0000725)	3/71	0.250314	1	1.7317	2.39847	SFPQ;RPA1;UBE2N
histone acetylation (GO:0016573)	3/71	0.250314	1	1.7317	2.39847	CREBBP;TAF12;MORF4L2
nuclear import (GO:0051170)	3/71	0.250314	1	1.7317	2.39847	NUP133;TSC2;SNRPB
regulation of primary metabolic process (GO:0080090)	5/139	0.252429	1	1.47423	2.02946	CREBBP;NCOR1;PSMC3;NCOA6;TXNRD1
positive regulation of mitotic cell cycle phase transition (GO:1901992)	2/40	0.255265	1	2.04918	2.79806	CUL3;ANAPC11
sterol biosynthetic process (GO:0016126)	2/40	0.255265	1	2.04918	2.79806	CNBP;PMVK
regulation of release of cytochrome c from mitochondria (GO:0090199)	2/40	0.255265	1	2.04918	2.79806	OPA1;BCL2L1
negative regulation of catabolic process (GO:0009895)	2/40	0.255265	1	2.04918	2.79806	EGFR;MAD2L1
neuron migration (GO:0001764)	2/40	0.255265	1	2.04918	2.79806	CDK5;FGFR1
regulation of viral transcription (GO:0046782)	2/40	0.255265	1	2.04918	2.79806	POLR2A;PSMC3
negative regulation of signal transduction (GO:0009968)	9/283	0.25584	1	1.30337	1.77675	BRAP;HGS;CNOT1;ERBB2;BCL2;TSC2;TSC1;EGFR;FGFR1
positive regulation of protein depolymerization (GO:1901881)	1/12	0.256594	1	3.4153	4.64569	SEMA5A
cardiac right ventricle morphogenesis (GO:0003215)	1/12	0.256594	1	3.4153	4.64569	BMPR1A
regulation of myoblast fusion (GO:1901739)	1/12	0.256594	1	3.4153	4.64569	CFLAR
peptidyl-arginine modification (GO:0018195)	1/12	0.256594	1	3.4153	4.64569	NDUFAF5
skeletal myofibril assembly (GO:0014866)	1/12	0.256594	1	3.4153	4.64569	CFLAR
establishment of apical/basal cell polarity (GO:0035089)	1/12	0.256594	1	3.4153	4.64569	CDC42
positive regulation of establishment of protein localization (GO:1904951)	1/12	0.256594	1	3.4153	4.64569	CHORDC1
pyrimidine nucleoside salvage (GO:0043097)	1/12	0.256594	1	3.4153	4.64569	TK1
carbohydrate derivative transport (GO:1901264)	1/12	0.256594	1	3.4153	4.64569	SLC25A19
cellular modified amino acid catabolic process (GO:0042219)	1/12	0.256594	1	3.4153	4.64569	GOT2
protein insertion into membrane (GO:0051205)	1/12	0.256594	1	3.4153	4.64569	EGFR
Golgi localization (GO:0051645)	1/12	0.256594	1	3.4153	4.64569	CDC42
regulation of cholesterol storage (GO:0010885)	1/12	0.256594	1	3.4153	4.64569	NR1H2
positive regulation of skeletal muscle tissue development (GO:0048643)	1/12	0.256594	1	3.4153	4.64569	ARNTL
cellular response to arsenic-containing substance (GO:0071243)	1/12	0.256594	1	3.4153	4.64569	DAXX
serine family amino acid biosynthetic process (GO:0009070)	1/12	0.256594	1	3.4153	4.64569	SEPHS2
regulation of cholesterol homeostasis (GO:2000188)	1/12	0.256594	1	3.4153	4.64569	NR1H2
histone H3 deacetylation (GO:0070932)	1/12	0.256594	1	3.4153	4.64569	SFPQ
regulation of protein localization to cell periphery (GO:1904375)	1/12	0.256594	1	3.4153	4.64569	CDK5
negative regulation by host of viral transcription (GO:0043922)	1/12	0.256594	1	3.4153	4.64569	TFAP4
positive regulation of pseudopodium assembly (GO:0031274)	1/12	0.256594	1	3.4153	4.64569	CDC42
cargo loading into COPII-coated vesicle (GO:0090110)	1/12	0.256594	1	3.4153	4.64569	SEC31A
kinetochore organization (GO:0051383)	1/12	0.256594	1	3.4153	4.64569	NDC80
regulation of pseudopodium assembly (GO:0031272)	1/12	0.256594	1	3.4153	4.64569	CDC42
positive regulation of peptidase activity (GO:0010952)	1/12	0.256594	1	3.4153	4.64569	NDUFA13
collagen metabolic process (GO:0032963)	1/12	0.256594	1	3.4153	4.64569	HIF1A
negative regulation of DNA damage response, signal transduction by p53 class mediator (GO:0043518)	1/12	0.256594	1	3.4153	4.64569	DYRK1A
peptidyl-methionine modification (GO:0018206)	1/12	0.256594	1	3.4153	4.64569	NAA30
establishment of protein localization to mitochondrial membrane (GO:0090151)	1/12	0.256594	1	3.4153	4.64569	NDUFA13
positive regulation of cyclase activity (GO:0031281)	1/12	0.256594	1	3.4153	4.64569	MAPK3
regulation of antigen receptor-mediated signaling pathway (GO:0050854)	1/12	0.256594	1	3.4153	4.64569	CBFB
pyrimidine-containing compound salvage (GO:0008655)	1/12	0.256594	1	3.4153	4.64569	TK1
negative regulation of androgen receptor signaling pathway (GO:0060766)	1/12	0.256594	1	3.4153	4.64569	FOXP1
regulation of sister chromatid cohesion (GO:0007063)	1/12	0.256594	1	3.4153	4.64569	RAD21
protein kinase C-activating G-protein coupled receptor signaling pathway (GO:0007205)	1/12	0.256594	1	3.4153	4.64569	DGKD
positive regulation of vascular endothelial growth factor receptor signaling pathway (GO:0030949)	1/12	0.256594	1	3.4153	4.64569	HIF1A
regulation of catabolic process (GO:0009894)	1/12	0.256594	1	3.4153	4.64569	HGS
positive regulation of SMAD protein import into nucleus (GO:0060391)	1/12	0.256594	1	3.4153	4.64569	BMPR1A
response to metal ion (GO:0010038)	3/72	0.256889	1	1.70765	2.32089	BCL2;HIF1A;SEC31A
regulation of phosphatase activity (GO:0010921)	3/72	0.256889	1	1.70765	2.32089	CHORDC1;TSC1;PKMYT1
regulation of fat cell differentiation (GO:0045598)	3/72	0.256889	1	1.70765	2.32089	CEBPB;ZFP36L2;ARNTL
regulation of epithelial cell proliferation (GO:0050678)	3/72	0.256889	1	1.70765	2.32089	DUSP10;ERBB2;EGFR
negative regulation of cell cycle (GO:0045786)	3/72	0.256889	1	1.70765	2.32089	HEXIM1;TFAP4;MAD2L1
negative regulation of sequence-specific DNA binding transcription factor activity (GO:0043433)	5/140	0.257028	1	1.4637	1.98854	TRAF3;CHORDC1;BHLHE40;KEAP1;COMMD6
positive regulation of Wnt signaling pathway (GO:0030177)	5/140	0.257028	1	1.4637	1.98854	USP8;PSMC3;USP34;ILK;ARNTL
transmembrane receptor protein tyrosine kinase signaling pathway (GO:0007169)	12/396	0.262214	1	1.24193	1.66244	SETX;CDC42;FIBP;POLR2A;ATP6AP1;SHC1;ERBB2;TSC2;PAK2;FGF3;FGFR1;MAPK3
regulation of stress-activated MAPK cascade (GO:0032872)	2/41	0.264361	1	1.9992	2.65981	EGFR;MAPK3
telomere organization (GO:0032200)	2/41	0.264361	1	1.9992	2.65981	PTGES3;RPA1
positive regulation of viral transcription (GO:0050434)	2/41	0.264361	1	1.9992	2.65981	TFAP4;POLR2A
gluconeogenesis (GO:0006094)	2/41	0.264361	1	1.9992	2.65981	SLC25A1;GOT2
positive regulation of MAP kinase activity (GO:0043406)	6/177	0.264516	1	1.38927	1.84753	SHC1;ERBB2;UBE2N;EGFR;FGFR1;MAPK3
positive regulation of macromolecule biosynthetic process (GO:0010557)	5/142	0.266285	1	1.44308	1.90947	SHC1;ERBB2;VIM;HIF1A;EGFR
cellular response to lipid (GO:0071396)	6/178	0.26865	1	1.38147	1.81573	SETX;UPF1;NDUFA13;RARG;NR1H2;EGFR
negative regulation of protein phosphorylation (GO:0001933)	6/178	0.26865	1	1.38147	1.81573	DGKQ;CHORDC1;AKT1S1;TSC2;PAK2;PPM1F
regulation of G-protein coupled receptor protein signaling pathway (GO:0008277)	3/74	0.270105	1	1.6615	2.17481	DGKQ;GRK6;RNF7
nitrogen compound transport (GO:0071705)	3/74	0.270105	1	1.6615	2.17481	COL4A3BP;TMEM30A;SLC7A11
glycolipid biosynthetic process (GO:0009247)	2/42	0.273458	1	1.9516	2.53046	DPM1;DPM2
negative regulation of cell proliferation (GO:0008285)	11/363	0.274291	1	1.24193	1.60651	RARG;MORC3;TFAP4;DUSP10;CUL5;HGS;BHLHE40;TSC2;TSC1;SOD2;BAP1
DNA-templated transcriptional preinitiation complex assembly (GO:0070897)	1/13	0.274744	1	3.15259	4.07287	TAF12
regulation of interleukin-1 beta production (GO:0032651)	1/13	0.274744	1	3.15259	4.07287	FOXP1
positive regulation of histone H3-K4 methylation (GO:0051571)	1/13	0.274744	1	3.15259	4.07287	PAXIP1
negative regulation of macrophage derived foam cell differentiation (GO:0010745)	1/13	0.274744	1	3.15259	4.07287	NR1H2
regulation of acyl-CoA biosynthetic process (GO:0050812)	1/13	0.274744	1	3.15259	4.07287	DLD
regulation of plasma membrane bounded cell projection organization (GO:0120035)	1/13	0.274744	1	3.15259	4.07287	VPS35
positive regulation of sodium ion transport (GO:0010765)	1/13	0.274744	1	3.15259	4.07287	WNK3
positive regulation of cardiac muscle cell proliferation (GO:0060045)	1/13	0.274744	1	3.15259	4.07287	BMPR1A
cellular response to nitrogen starvation (GO:0006995)	1/13	0.274744	1	3.15259	4.07287	NPRL2
DNA replication-independent nucleosome organization (GO:0034724)	1/13	0.274744	1	3.15259	4.07287	ATRX
regulation of glucose import in response to insulin stimulus (GO:2001273)	1/13	0.274744	1	3.15259	4.07287	OSBPL8
viral translation (GO:0019081)	1/13	0.274744	1	3.15259	4.07287	PCBP2
endoplasmic reticulum tubular network organization (GO:0071786)	1/13	0.274744	1	3.15259	4.07287	RTN4
multivesicular body sorting pathway (GO:0071985)	1/13	0.274744	1	3.15259	4.07287	CHMP5
regulation of acetyl-CoA biosynthetic process from pyruvate (GO:0010510)	1/13	0.274744	1	3.15259	4.07287	DLD
placenta development (GO:0001890)	1/13	0.274744	1	3.15259	4.07287	E2F8
DNA damage response, signal transduction by p53 class mediator resulting in transcription of p21 class mediator (GO:0006978)	1/13	0.274744	1	3.15259	4.07287	TFAP4
positive regulation of cholesterol efflux (GO:0010875)	1/13	0.274744	1	3.15259	4.07287	NR1H2
positive regulation of protein complex disassembly (GO:0043243)	1/13	0.274744	1	3.15259	4.07287	SETX
alpha-linolenic acid metabolic process (GO:0036109)	1/13	0.274744	1	3.15259	4.07287	HSD17B4
synaptic vesicle localization (GO:0097479)	1/13	0.274744	1	3.15259	4.07287	CDK5
regulation of execution phase of apoptosis (GO:1900117)	1/13	0.274744	1	3.15259	4.07287	BCL2L1
ER-associated misfolded protein catabolic process (GO:0071712)	1/13	0.274744	1	3.15259	4.07287	RNF185
establishment of chromosome localization (GO:0051303)	1/13	0.274744	1	3.15259	4.07287	NDC80
membrane repolarization (GO:0086009)	1/13	0.274744	1	3.15259	4.07287	KCNE2
regulation of endothelial cell chemotaxis (GO:2001026)	1/13	0.274744	1	3.15259	4.07287	SEMA5A
regulation of necrotic cell death (GO:0010939)	1/13	0.274744	1	3.15259	4.07287	CFLAR
dicarboxylic acid catabolic process (GO:0043649)	1/13	0.274744	1	3.15259	4.07287	GOT2
prostanoid biosynthetic process (GO:0046457)	1/13	0.274744	1	3.15259	4.07287	PTGES3
positive regulation of lamellipodium assembly (GO:0010592)	1/13	0.274744	1	3.15259	4.07287	CDC42
regulation of retinoic acid receptor signaling pathway (GO:0048385)	1/13	0.274744	1	3.15259	4.07287	CNOT1
regulation of transcription initiation from RNA polymerase II promoter (GO:0060260)	1/13	0.274744	1	3.15259	4.07287	PAXIP1
glomerular visceral epithelial cell differentiation (GO:0072112)	1/13	0.274744	1	3.15259	4.07287	IQGAP1
negative regulation of ubiquitin-protein transferase activity (GO:0051444)	1/13	0.274744	1	3.15259	4.07287	MAD2L1
regulation of synaptic vesicle transport (GO:1902803)	1/13	0.274744	1	3.15259	4.07287	CDK5
ribonucleoprotein complex disassembly (GO:0032988)	1/13	0.274744	1	3.15259	4.07287	KLC1
cellular response to nitrogen levels (GO:0043562)	1/13	0.274744	1	3.15259	4.07287	NPRL2
Wnt signaling pathway (GO:0016055)	4/109	0.275858	1	1.50399	1.93693	VPS29;RARG;USP34;VPS35
regulation of actin cytoskeleton organization (GO:0032956)	3/75	0.276742	1	1.63934	2.10601	CDC42;TSC1;RICTOR
negative regulation of protein metabolic process (GO:0051248)	2/43	0.28255	1	1.90621	2.40927	EGFR;MAD2L1
RNA catabolic process (GO:0006401)	2/43	0.28255	1	1.90621	2.40927	CNOT10;ZFP36L2
double-strand break repair via homologous recombination (GO:0000724)	3/76	0.283395	1	1.61777	2.03987	SFPQ;RPA1;UBE2N
positive regulation of cytoskeleton organization (GO:0051495)	3/77	0.290061	1	1.59676	1.97626	SEMA5A;CDC42;CDK5
regulation of focal adhesion assembly (GO:0051893)	2/44	0.291631	1	1.86289	2.29558	TSC1;PPM1F
sprouting angiogenesis (GO:0002040)	2/44	0.291631	1	1.86289	2.29558	SEMA5A;E2F8
hexose biosynthetic process (GO:0019319)	2/44	0.291631	1	1.86289	2.29558	SLC25A1;GOT2
negative regulation of type I interferon production (GO:0032480)	2/44	0.291631	1	1.86289	2.29558	TRAF3;PCBP2
positive regulation of transport (GO:0051050)	2/44	0.291631	1	1.86289	2.29558	CHORDC1;ACSL3
regulation of intracellular pH (GO:0051453)	2/44	0.291631	1	1.86289	2.29558	VPS33A;CHORDC1
mitotic nuclear envelope disassembly (GO:0007077)	2/44	0.291631	1	1.86289	2.29558	NUP133;CNEP1R1
positive regulation of actin filament bundle assembly (GO:0032233)	2/44	0.291631	1	1.86289	2.29558	CDC42;PPM1F
positive regulation of viral process (GO:0048524)	2/44	0.291631	1	1.86289	2.29558	DDB1;POLR2A
myeloid cell differentiation (GO:0030099)	2/44	0.291631	1	1.86289	2.29558	NCOA6;ACIN1
nucleoside salvage (GO:0043174)	1/14	0.292452	1	2.9274	3.59911	TK1
ncRNA transcription (GO:0098781)	1/14	0.292452	1	2.9274	3.59911	RPAP2
positive regulation of osteoclast differentiation (GO:0045672)	1/14	0.292452	1	2.9274	3.59911	ATP6AP1
establishment of mitotic spindle orientation (GO:0000132)	1/14	0.292452	1	2.9274	3.59911	NDC80
establishment or maintenance of actin cytoskeleton polarity (GO:0030950)	1/14	0.292452	1	2.9274	3.59911	RICTOR
regulation of secretion (GO:0051046)	1/14	0.292452	1	2.9274	3.59911	ACSL3
negative regulation of Rho protein signal transduction (GO:0035024)	1/14	0.292452	1	2.9274	3.59911	CUL3
regulation of calcineurin-NFAT signaling cascade (GO:0070884)	1/14	0.292452	1	2.9274	3.59911	CHORDC1
cell surface receptor signaling pathway involved in heart development (GO:0061311)	1/14	0.292452	1	2.9274	3.59911	BMPR1A
oligodendrocyte differentiation (GO:0048709)	1/14	0.292452	1	2.9274	3.59911	CDK5
copper ion transport (GO:0006825)	1/14	0.292452	1	2.9274	3.59911	COX17
regulation of lymphocyte differentiation (GO:0045619)	1/14	0.292452	1	2.9274	3.59911	ZFP36L2
negative regulation of biomineral tissue development (GO:0070168)	1/14	0.292452	1	2.9274	3.59911	BCOR
amyloid-beta metabolic process (GO:0050435)	1/14	0.292452	1	2.9274	3.59911	DYRK1A
regulation of cyclin-dependent protein serine/threonine kinase activity involved in G1/S transition of mitotic cell cycle (GO:0031657)	1/14	0.292452	1	2.9274	3.59911	EGFR
response to ethanol (GO:0045471)	1/14	0.292452	1	2.9274	3.59911	GOT2
regulation of ventricular cardiac muscle cell membrane repolarization (GO:0060307)	1/14	0.292452	1	2.9274	3.59911	KCNE2
Golgi to vacuole transport (GO:0006896)	1/14	0.292452	1	2.9274	3.59911	VPS52
DNA damage response, signal transduction resulting in transcription (GO:0042772)	1/14	0.292452	1	2.9274	3.59911	TFAP4
regulation of transferase activity (GO:0051338)	1/14	0.292452	1	2.9274	3.59911	SMG6
positive regulation of vascular smooth muscle cell proliferation (GO:1904707)	1/14	0.292452	1	2.9274	3.59911	BMPR1A
fatty acid transport (GO:0015908)	1/14	0.292452	1	2.9274	3.59911	GOT2
regulation of synapse organization (GO:0050807)	1/14	0.292452	1	2.9274	3.59911	VPS35
regulation of histone modification (GO:0031056)	1/14	0.292452	1	2.9274	3.59911	UBE2N
negative regulation of smooth muscle cell migration (GO:0014912)	1/14	0.292452	1	2.9274	3.59911	BMPR1A
positive regulation of transporter activity (GO:0032411)	1/14	0.292452	1	2.9274	3.59911	WNK3
regulation of response to interferon-gamma (GO:0060330)	1/14	0.292452	1	2.9274	3.59911	HSP90AB1
estrogen metabolic process (GO:0008210)	1/14	0.292452	1	2.9274	3.59911	HSD17B4
response to ATP (GO:0033198)	1/14	0.292452	1	2.9274	3.59911	DGKQ
positive regulation of translation (GO:0045727)	3/78	0.296738	1	1.57629	1.91504	RPS9;ERBB2;VIM
regulation of transcription from RNA polymerase II promoter in response to hypoxia (GO:0061418)	3/78	0.296738	1	1.57629	1.91504	CREBBP;PSMC3;HIF1A
hexose metabolic process (GO:0019318)	2/45	0.300697	1	1.82149	2.1888	SLC35A2;PMM2
positive regulation of blood vessel endothelial cell migration (GO:0043536)	2/45	0.300697	1	1.82149	2.1888	HIF1A;FGFR1
nucleus organization (GO:0006997)	2/45	0.300697	1	1.82149	2.1888	NUP133;CHMP5
mitochondrial gene expression (GO:0140053)	2/45	0.300697	1	1.82149	2.1888	MRPS18A;MRPL23
nucleosome organization (GO:0034728)	3/79	0.303425	1	1.55634	1.85612	DAXX;ATRX;HIST1H2BK
cellular response to interleukin-1 (GO:0071347)	5/150	0.303978	1	1.36612	1.62677	UPF1;PSMC3;UBE2N;HIF1A;MAPK3
regulation of protein phosphorylation (GO:0001932)	8/261	0.306327	1	1.2562	1.48622	DAXX;CHORDC1;ERBB2;ILK;SMG8;PAK2;EGFR;MAPK3
negative regulation of cell growth (GO:0030308)	4/115	0.308705	1	1.42552	1.67551	NDUFA13;NME6;NDUFS3;RTN4
atrioventricular valve morphogenesis (GO:0003181)	1/15	0.309728	1	2.73224	3.20235	BMPR1A
myeloid cell development (GO:0061515)	1/15	0.309728	1	2.73224	3.20235	FOXP1
membrane repolarization during cardiac muscle cell action potential (GO:0086013)	1/15	0.309728	1	2.73224	3.20235	KCNE2
regulation of mRNA metabolic process (GO:1903311)	1/15	0.309728	1	2.73224	3.20235	SAFB
fatty acid beta-oxidation using acyl-CoA oxidase (GO:0033540)	1/15	0.309728	1	2.73224	3.20235	HSD17B4
negative regulation of peptidyl-threonine phosphorylation (GO:0010801)	1/15	0.309728	1	2.73224	3.20235	DGKQ
selective autophagy (GO:0061912)	1/15	0.309728	1	2.73224	3.20235	AMBRA1
maintenance of protein location in nucleus (GO:0051457)	1/15	0.309728	1	2.73224	3.20235	MORC3
endocardial cushion morphogenesis (GO:0003203)	1/15	0.309728	1	2.73224	3.20235	BMPR1A
positive regulation of glycolytic process (GO:0045821)	1/15	0.309728	1	2.73224	3.20235	HIF1A
negative regulation of platelet-derived growth factor receptor signaling pathway (GO:0010642)	1/15	0.309728	1	2.73224	3.20235	HGS
mitotic sister chromatid cohesion (GO:0007064)	1/15	0.309728	1	2.73224	3.20235	MAU2
pyrimidine nucleoside biosynthetic process (GO:0046134)	1/15	0.309728	1	2.73224	3.20235	TK1
protein localization to chromosome, telomeric region (GO:0070198)	1/15	0.309728	1	2.73224	3.20235	ATRX
phototransduction, visible light (GO:0007603)	1/15	0.309728	1	2.73224	3.20235	RNF7
positive regulation of coenzyme metabolic process (GO:0051197)	1/15	0.309728	1	2.73224	3.20235	HIF1A
regulation of interleukin-4 production (GO:0032673)	1/15	0.309728	1	2.73224	3.20235	CEBPB
ventricular cardiac muscle cell action potential (GO:0086005)	1/15	0.309728	1	2.73224	3.20235	KCNE2
regulation of centriole replication (GO:0046599)	1/15	0.309728	1	2.73224	3.20235	RBM14
negative regulation of cell aging (GO:0090344)	1/15	0.309728	1	2.73224	3.20235	March5
mesenchyme morphogenesis (GO:0072132)	1/15	0.309728	1	2.73224	3.20235	BMPR1A
pyrimidine nucleoside metabolic process (GO:0006213)	1/15	0.309728	1	2.73224	3.20235	ERH
positive regulation of phosphoprotein phosphatase activity (GO:0032516)	1/15	0.309728	1	2.73224	3.20235	HSP90AB1
response to cholesterol (GO:0070723)	1/15	0.309728	1	2.73224	3.20235	PMVK
regulation of mitotic sister chromatid separation (GO:0010965)	1/15	0.309728	1	2.73224	3.20235	CDC23
regulation of exit from mitosis (GO:0007096)	1/15	0.309728	1	2.73224	3.20235	CDC23
regulation of delayed rectifier potassium channel activity (GO:1902259)	1/15	0.309728	1	2.73224	3.20235	KCNE2
positive regulation of viral release from host cell (GO:1902188)	1/15	0.309728	1	2.73224	3.20235	DDB1
negative regulation of signal transduction by p53 class mediator (GO:1901797)	1/15	0.309728	1	2.73224	3.20235	DYRK1A
negative regulation of axon extension involved in axon guidance (GO:0048843)	1/15	0.309728	1	2.73224	3.20235	SEMA5A
positive regulation of cellular response to insulin stimulus (GO:1900078)	1/15	0.309728	1	2.73224	3.20235	OSBPL8
cofactor transport (GO:0051181)	1/15	0.309728	1	2.73224	3.20235	SLC25A19
positive regulation of interleukin-4 production (GO:0032753)	1/15	0.309728	1	2.73224	3.20235	CEBPB
negative regulation of DNA-dependent DNA replication (GO:2000104)	1/15	0.309728	1	2.73224	3.20235	STAG2
positive regulation of collagen metabolic process (GO:0010714)	1/15	0.309728	1	2.73224	3.20235	VIM
negative regulation of RNA metabolic process (GO:0051253)	1/15	0.309728	1	2.73224	3.20235	NCOR1
positive regulation of exosomal secretion (GO:1903543)	1/15	0.309728	1	2.73224	3.20235	HGS
JAK-STAT cascade involved in growth hormone signaling pathway (GO:0060397)	1/15	0.309728	1	2.73224	3.20235	MAPK3
positive regulation of collagen biosynthetic process (GO:0032967)	1/15	0.309728	1	2.73224	3.20235	VIM
regulation of protein complex disassembly (GO:0043244)	1/15	0.309728	1	2.73224	3.20235	UPF1
cytoplasmic sequestering of protein (GO:0051220)	1/15	0.309728	1	2.73224	3.20235	KEAP1
regulation of cell junction assembly (GO:1901888)	1/15	0.309728	1	2.73224	3.20235	CBFB
establishment of protein localization to endoplasmic reticulum (GO:0072599)	1/15	0.309728	1	2.73224	3.20235	PMM2
cellular response to corticosteroid stimulus (GO:0071384)	1/15	0.309728	1	2.73224	3.20235	ZFP36L2
protein complex disassembly (GO:0043241)	2/46	0.309744	1	1.7819	2.0884	VPS33A;VPS16
positive regulation of protein localization to cell periphery (GO:1904377)	2/46	0.309744	1	1.7819	2.0884	WNK3;EGFR
negative regulation of protein modification by small protein conjugation or removal (GO:1903321)	2/46	0.309744	1	1.7819	2.0884	DNAJA1;CHORDC1
nuclear envelope disassembly (GO:0051081)	2/46	0.309744	1	1.7819	2.0884	NUP133;CNEP1R1
regulation of cellular component movement (GO:0051270)	2/46	0.309744	1	1.7819	2.0884	ERBB2;EGFR
positive regulation of protein targeting to mitochondrion (GO:1903955)	3/81	0.316815	1	1.51791	1.74474	ARIH2;VPS11;BAP1
positive regulation of organelle assembly (GO:1902117)	2/47	0.318766	1	1.74398	1.99389	CNOT1;CNOT2
fatty acid biosynthetic process (GO:0006633)	2/47	0.318766	1	1.74398	1.99389	LIAS;ACACA
activation of MAPK activity (GO:0000187)	4/117	0.319747	1	1.40115	1.59762	DAXX;SHC1;UBE2N;MAPK3
negative regulation of NF-kappaB transcription factor activity (GO:0032088)	3/82	0.323515	1	1.4994	1.69209	TRAF3;CHORDC1;COMMD6
positive regulation of cell cycle (GO:0045787)	3/82	0.323515	1	1.4994	1.69209	HSP90AB1;TFAP4;CKS1B
positive regulation of protein serine/threonine kinase activity (GO:0071902)	4/118	0.32528	1	1.38927	1.56025	ERBB2;EGFR;FGFR1;CKS1B
regulation of actin nucleation (GO:0051125)	1/16	0.326583	1	2.56148	2.86647	ARF1
negative regulation of NF-kappaB import into nucleus (GO:0042347)	1/16	0.326583	1	2.56148	2.86647	CCDC22
positive regulation of secretion (GO:0051047)	1/16	0.326583	1	2.56148	2.86647	ACSL3
positive regulation of cardiac muscle tissue growth (GO:0055023)	1/16	0.326583	1	2.56148	2.86647	BMPR1A
negative regulation of immune effector process (GO:0002698)	1/16	0.326583	1	2.56148	2.86647	PCBP2
DNA alkylation (GO:0006305)	1/16	0.326583	1	2.56148	2.86647	ATRX
embryonic digit morphogenesis (GO:0042733)	1/16	0.326583	1	2.56148	2.86647	CREBBP
hyaluronan catabolic process (GO:0030214)	1/16	0.326583	1	2.56148	2.86647	CHORDC1
histone H2A acetylation (GO:0043968)	1/16	0.326583	1	2.56148	2.86647	MORF4L2
regulation of exosomal secretion (GO:1903541)	1/16	0.326583	1	2.56148	2.86647	HGS
positive regulation of lymphocyte differentiation (GO:0045621)	1/16	0.326583	1	2.56148	2.86647	PPP2R3C
guanosine-containing compound metabolic process (GO:1901068)	1/16	0.326583	1	2.56148	2.86647	OPA1
regulation of bicellular tight junction assembly (GO:2000810)	1/16	0.326583	1	2.56148	2.86647	CBFB
DNA methylation or demethylation (GO:0044728)	1/16	0.326583	1	2.56148	2.86647	ATRX
negative regulation of translational initiation (GO:0045947)	1/16	0.326583	1	2.56148	2.86647	AGO2
cellular response to pH (GO:0071467)	1/16	0.326583	1	2.56148	2.86647	CHORDC1
peptidyl-lysine methylation (GO:0018022)	1/16	0.326583	1	2.56148	2.86647	SETD4
dendritic spine morphogenesis (GO:0060997)	1/16	0.326583	1	2.56148	2.86647	CDC42
miRNA metabolic process (GO:0010586)	1/16	0.326583	1	2.56148	2.86647	AGO2
bone morphogenesis (GO:0060349)	1/16	0.326583	1	2.56148	2.86647	RARG
regulation of SMAD protein import into nucleus (GO:0060390)	1/16	0.326583	1	2.56148	2.86647	BMPR1A
positive regulation of nitric-oxide synthase activity (GO:0051000)	1/16	0.326583	1	2.56148	2.86647	HIF1A
regulation of protein homodimerization activity (GO:0043496)	1/16	0.326583	1	2.56148	2.86647	BCL2
mRNA transcription from RNA polymerase II promoter (GO:0042789)	1/16	0.326583	1	2.56148	2.86647	HIF1A
regulation of necroptotic process (GO:0060544)	1/16	0.326583	1	2.56148	2.86647	CFLAR
aorta morphogenesis (GO:0035909)	1/16	0.326583	1	2.56148	2.86647	BMPR1A
regulation of membrane repolarization (GO:0060306)	1/16	0.326583	1	2.56148	2.86647	KCNE2
positive regulation of response to endoplasmic reticulum stress (GO:1905898)	1/16	0.326583	1	2.56148	2.86647	TMEM259
regulation of intrinsic apoptotic signaling pathway in response to DNA damage (GO:1902229)	1/16	0.326583	1	2.56148	2.86647	BCL2L1
cytoplasmic microtubule organization (GO:0031122)	2/48	0.32776	1	1.70765	1.90484	CHORDC1;CAMSAP2
glycoprotein metabolic process (GO:0009100)	2/48	0.32776	1	1.70765	1.90484	EDEM2;HIF1A
interstrand cross-link repair (GO:0036297)	2/48	0.32776	1	1.70765	1.90484	RPA1;ATRIP
positive regulation of chemotaxis (GO:0050921)	2/48	0.32776	1	1.70765	1.90484	SEMA5A;PPM1F
regulation of programmed cell death (GO:0043067)	8/268	0.331645	1	1.22339	1.35025	CREBBP;RARG;CDK5;OPA1;AKT1S1;CFLAR;PAK2;RTN4
negative regulation of growth (GO:0045926)	4/120	0.336362	1	1.36612	1.48848	NDUFA13;NME6;NDUFS3;RTN4
positive regulation of cell differentiation (GO:0045597)	6/194	0.336569	1	1.26753	1.38028	CDC42;CEBPB;HSP90AB1;ATP6AP1;ARNTL;BMPR1A
organic hydroxy compound biosynthetic process (GO:1901617)	2/49	0.336721	1	1.6728	1.82084	PMVK;HSD17B4
positive regulation of response to DNA damage stimulus (GO:2001022)	2/49	0.336721	1	1.6728	1.82084	UBE2N;EGFR
stimulatory C-type lectin receptor signaling pathway (GO:0002223)	4/121	0.34191	1	1.35483	1.45402	CREBBP;PSMC3;UBE2N;PAK2
regulation of cell differentiation (GO:0045595)	4/121	0.34191	1	1.35483	1.45402	CREBBP;HSP90AB1;CBFB;FGFR1
positive regulation of cholesterol transport (GO:0032376)	1/17	0.343028	1	2.4108	2.57942	NR1H2
negative regulation of axon guidance (GO:1902668)	1/17	0.343028	1	2.4108	2.57942	SEMA5A
positive regulation of G-protein coupled receptor protein signaling pathway (GO:0045745)	1/17	0.343028	1	2.4108	2.57942	VPS35
regulation of telomere maintenance via telomere lengthening (GO:1904356)	1/17	0.343028	1	2.4108	2.57942	SMG6
response to interferon-alpha (GO:0035455)	1/17	0.343028	1	2.4108	2.57942	KLHL20
positive regulation of nitrogen compound metabolic process (GO:0051173)	1/17	0.343028	1	2.4108	2.57942	ACSL3
cardiac muscle cell contraction (GO:0086003)	1/17	0.343028	1	2.4108	2.57942	KCNE2
preassembly of GPI anchor in ER membrane (GO:0016254)	1/17	0.343028	1	2.4108	2.57942	DPM2
positive regulation of fatty acid metabolic process (GO:0045923)	1/17	0.343028	1	2.4108	2.57942	NR1H2
RNA stabilization (GO:0043489)	1/17	0.343028	1	2.4108	2.57942	DHX36
regulation of transposition (GO:0010528)	1/17	0.343028	1	2.4108	2.57942	UBR2
negative regulation of telomere maintenance (GO:0032205)	1/17	0.343028	1	2.4108	2.57942	SMG6
mRNA cis splicing, via spliceosome (GO:0045292)	1/17	0.343028	1	2.4108	2.57942	SRSF1
N-glycan processing (GO:0006491)	1/17	0.343028	1	2.4108	2.57942	EDEM2
peptidyl-lysine trimethylation (GO:0018023)	1/17	0.343028	1	2.4108	2.57942	SETD4
regulation of collagen biosynthetic process (GO:0032965)	1/17	0.343028	1	2.4108	2.57942	VIM
pharyngeal system development (GO:0060037)	1/17	0.343028	1	2.4108	2.57942	BMPR1A
regulation of protein localization to membrane (GO:1905475)	1/17	0.343028	1	2.4108	2.57942	CDK5
response to purine-containing compound (GO:0014074)	1/17	0.343028	1	2.4108	2.57942	DGKQ
positive regulation of signal transduction by p53 class mediator (GO:1901798)	1/17	0.343028	1	2.4108	2.57942	HEXIM1
macrophage activation (GO:0042116)	1/17	0.343028	1	2.4108	2.57942	FOXP1
virion assembly (GO:0019068)	1/17	0.343028	1	2.4108	2.57942	CHMP5
heterocycle biosynthetic process (GO:0018130)	1/17	0.343028	1	2.4108	2.57942	LIAS
positive regulation by host of viral transcription (GO:0043923)	1/17	0.343028	1	2.4108	2.57942	TFAP4
regulation of lamellipodium organization (GO:1902743)	1/17	0.343028	1	2.4108	2.57942	CDC42
synaptic vesicle transport (GO:0048489)	1/17	0.343028	1	2.4108	2.57942	CDK5
regulation of B cell receptor signaling pathway (GO:0050855)	1/17	0.343028	1	2.4108	2.57942	CBFB
positive regulation of telomere capping (GO:1904355)	1/17	0.343028	1	2.4108	2.57942	MAPK3
cellular response to inorganic substance (GO:0071241)	1/17	0.343028	1	2.4108	2.57942	ATRX
positive regulation of cation transmembrane transport (GO:1904064)	1/17	0.343028	1	2.4108	2.57942	COX17
positive regulation of transcription of Notch receptor target (GO:0007221)	1/17	0.343028	1	2.4108	2.57942	CREBBP
cellular response to glucocorticoid stimulus (GO:0071385)	1/17	0.343028	1	2.4108	2.57942	ZFP36L2
regulation of peptidyl-tyrosine phosphorylation (GO:0050730)	3/85	0.343607	1	1.44648	1.54521	DGKQ;PAK2;EGFR
regulation of bone mineralization (GO:0030500)	2/50	0.345647	1	1.63934	1.74154	BCOR;BMPR1A
myeloid leukocyte differentiation (GO:0002573)	2/50	0.345647	1	1.63934	1.74154	CDC42;FOXP1
regulation of blood vessel endothelial cell migration (GO:0043535)	2/50	0.345647	1	1.63934	1.74154	HIF1A;FGFR1
negative regulation of protein ubiquitination (GO:0031397)	2/50	0.345647	1	1.63934	1.74154	DNAJA1;CHORDC1
toll-like receptor signaling pathway (GO:0002224)	3/86	0.350296	1	1.42966	1.49968	TRAF3;PIK3R4;PIK3C3
tumor necrosis factor-mediated signaling pathway (GO:0033209)	4/123	0.353011	1	1.3328	1.38779	PSMC3;TRAF3;ILK;TXNDC17
regulation of telomere maintenance via telomerase (GO:0032210)	2/51	0.354532	1	1.6072	1.6666	SMG6;MAPK3
telomere maintenance (GO:0000723)	2/51	0.354532	1	1.6072	1.6666	PTGES3;RPA1
innate immune response activating cell surface receptor signaling pathway (GO:0002220)	4/124	0.358562	1	1.32205	1.35597	CREBBP;PSMC3;UBE2N;PAK2
dephosphorylation (GO:0016311)	4/124	0.358562	1	1.32205	1.35597	PPP1CB;PPP6C;DUSP10;DUSP28
regulation of adherens junction organization (GO:1903391)	1/18	0.359072	1	2.27687	2.33204	PTPN23
membrane lipid metabolic process (GO:0006643)	1/18	0.359072	1	2.27687	2.33204	SPTLC1
regulation of amyloid-beta formation (GO:1902003)	1/18	0.359072	1	2.27687	2.33204	TMED10
nuclear envelope reassembly (GO:0031468)	1/18	0.359072	1	2.27687	2.33204	ANKLE2
anion transmembrane transport (GO:0098656)	1/18	0.359072	1	2.27687	2.33204	SLC35A2
calcium-mediated signaling using intracellular calcium source (GO:0035584)	1/18	0.359072	1	2.27687	2.33204	BCAP31
maintenance of protein localization in organelle (GO:0072595)	1/18	0.359072	1	2.27687	2.33204	MORC3
anterior/posterior axis specification (GO:0009948)	1/18	0.359072	1	2.27687	2.33204	CDX2
negative regulation of fibroblast proliferation (GO:0048147)	1/18	0.359072	1	2.27687	2.33204	MORC3
establishment of mitotic spindle localization (GO:0040001)	1/18	0.359072	1	2.27687	2.33204	NDC80
regulation of chemokine production (GO:0032642)	1/18	0.359072	1	2.27687	2.33204	HIF1A
regulation of dephosphorylation (GO:0035303)	1/18	0.359072	1	2.27687	2.33204	SMG6
positive regulation of metabolic process (GO:0009893)	1/18	0.359072	1	2.27687	2.33204	ACACA
ubiquitin-dependent protein catabolic process via the multivesicular body sorting pathway (GO:0043162)	1/18	0.359072	1	2.27687	2.33204	PTPN23
prostaglandin biosynthetic process (GO:0001516)	1/18	0.359072	1	2.27687	2.33204	PTGES3
negative regulation of microtubule depolymerization (GO:0007026)	1/18	0.359072	1	2.27687	2.33204	CAMSAP2
regulation of cardiac muscle cell proliferation (GO:0060043)	1/18	0.359072	1	2.27687	2.33204	BMPR1A
regulation of cholesterol efflux (GO:0010874)	1/18	0.359072	1	2.27687	2.33204	NR1H2
regulation of cardiac muscle cell membrane repolarization (GO:0099623)	1/18	0.359072	1	2.27687	2.33204	KCNE2
negative regulation of peptidyl-serine phosphorylation (GO:0033137)	1/18	0.359072	1	2.27687	2.33204	PPM1F
heart trabecula morphogenesis (GO:0061384)	1/18	0.359072	1	2.27687	2.33204	BMPR1A
acute-phase response (GO:0006953)	1/18	0.359072	1	2.27687	2.33204	CEBPB
phosphatidylglycerol acyl-chain remodeling (GO:0036148)	1/18	0.359072	1	2.27687	2.33204	SERAC1
DNA methylation (GO:0006306)	1/18	0.359072	1	2.27687	2.33204	ATRX
regulation of microtubule polymerization or depolymerization (GO:0031110)	1/18	0.359072	1	2.27687	2.33204	CAMSAP2
positive regulation of carbohydrate metabolic process (GO:0045913)	1/18	0.359072	1	2.27687	2.33204	HIF1A
regulation of peptidase activity (GO:0052547)	1/18	0.359072	1	2.27687	2.33204	NDUFA13
establishment of epithelial cell polarity (GO:0090162)	1/18	0.359072	1	2.27687	2.33204	CDC42
regulation of smooth muscle cell migration (GO:0014910)	1/18	0.359072	1	2.27687	2.33204	BMPR1A
positive regulation of morphogenesis of an epithelium (GO:1905332)	1/18	0.359072	1	2.27687	2.33204	SIRT6
negative regulation of calcium-mediated signaling (GO:0050849)	1/18	0.359072	1	2.27687	2.33204	CHORDC1
positive regulation of ossification (GO:0045778)	2/52	0.363375	1	1.57629	1.59571	ATP6AP1;BMPR1A
regulation of calcium ion transport (GO:0051924)	2/52	0.363375	1	1.57629	1.59571	WNK3;BCL2
positive regulation of cell-substrate adhesion (GO:0010811)	2/52	0.363375	1	1.57629	1.59571	CDC42;PPM1F
regulation of stem cell differentiation (GO:2000736)	3/88	0.363649	1	1.39717	1.41333	CBFB;PSMC3;ZFP36L2
positive regulation of I-kappaB kinase/NF-kappaB signaling (GO:0043123)	5/163	0.366603	1	1.25717	1.26154	GOLT1B;TFG;UBE2N;CCDC22;CFLAR
positive regulation of ERK1 and ERK2 cascade (GO:0070374)	6/201	0.366942	1	1.22339	1.22651	ATP6AP1;SHC1;ERBB2;EGFR;FGFR1;MAPK3
G2/M transition of mitotic cell cycle (GO:0000086)	4/126	0.369662	1	1.30107	1.29478	PPP1CB;WEE1;PKMYT1;DYNLL1
cytoskeleton organization (GO:0007010)	4/126	0.369662	1	1.30107	1.29478	CDC42;PPP2R3C;FITM2;KLHL20
SRP-dependent cotranslational protein targeting to membrane (GO:0006614)	3/89	0.37031	1	1.38147	1.37237	RPS9;SRP72;SEC63
positive regulation of multicellular organismal process (GO:0051240)	6/202	0.371295	1	1.21733	1.20609	PAXIP1;AGO2;HIF1A;RTN4;PPM1F;BMPR1A
regulation of cellular macromolecule biosynthetic process (GO:2000112)	17/631	0.372623	1	1.10415	1.09001	ESRRA;KMT2D;DAXX;CREBBP;CEBPB;NUP133;CNBP;NFYC;ATRX;ASH2L;TSC1;HIF1A;ARNTL;SFPQ;POLR2A;BHLHE40;UBTF
positive regulation of transforming growth factor beta receptor signaling pathway (GO:0030511)	1/19	0.374724	1	2.15703	2.11727	HSP90AB1
protein import into mitochondrial matrix (GO:0030150)	1/19	0.374724	1	2.15703	2.11727	TIMM23
regulation of gluconeogenesis (GO:0006111)	1/19	0.374724	1	2.15703	2.11727	DGKQ
protein ADP-ribosylation (GO:0006471)	1/19	0.374724	1	2.15703	2.11727	SIRT6
negative regulation of protein localization to plasma membrane (GO:1903077)	1/19	0.374724	1	2.15703	2.11727	BCL2L1
protein targeting to lysosome (GO:0006622)	1/19	0.374724	1	2.15703	2.11727	HGS
negative regulation of transposition (GO:0010529)	1/19	0.374724	1	2.15703	2.11727	UBR2
sulfur compound transport (GO:0072348)	1/19	0.374724	1	2.15703	2.11727	SLC25A19
negative regulation of response to biotic stimulus (GO:0002832)	1/19	0.374724	1	2.15703	2.11727	PCBP2
positive regulation of oxidoreductase activity (GO:0051353)	1/19	0.374724	1	2.15703	2.11727	COX17
endocardial cushion development (GO:0003197)	1/19	0.374724	1	2.15703	2.11727	BMPR1A
positive regulation of lipid storage (GO:0010884)	1/19	0.374724	1	2.15703	2.11727	FITM2
osteoclast differentiation (GO:0030316)	1/19	0.374724	1	2.15703	2.11727	FOXP1
positive regulation of interferon-alpha production (GO:0032727)	1/19	0.374724	1	2.15703	2.11727	DHX36
cellular polysaccharide biosynthetic process (GO:0033692)	1/19	0.374724	1	2.15703	2.11727	B3GNT2
histone deubiquitination (GO:0016578)	1/19	0.374724	1	2.15703	2.11727	ATXN7L3
macromolecule biosynthetic process (GO:0009059)	1/19	0.374724	1	2.15703	2.11727	EIF4G2
negative regulation of protein localization to cell periphery (GO:1904376)	1/19	0.374724	1	2.15703	2.11727	BCL2L1
positive regulation of immunoglobulin production (GO:0002639)	1/19	0.374724	1	2.15703	2.11727	PAXIP1
nucleotide-sugar biosynthetic process (GO:0009226)	1/19	0.374724	1	2.15703	2.11727	PMM2
positive regulation of phospholipase activity (GO:0010518)	1/19	0.374724	1	2.15703	2.11727	FGFR1
positive regulation of pri-miRNA transcription from RNA polymerase II promoter (GO:1902895)	1/19	0.374724	1	2.15703	2.11727	HIF1A
DNA double-strand break processing (GO:0000729)	1/19	0.374724	1	2.15703	2.11727	UBE2N
drug transport (GO:0015893)	1/19	0.374724	1	2.15703	2.11727	TMEM30A
positive regulation of epithelial cell differentiation (GO:0030858)	1/19	0.374724	1	2.15703	2.11727	VEZF1
innate immune response in mucosa (GO:0002227)	1/19	0.374724	1	2.15703	2.11727	HIST1H2BK
regulation of cAMP biosynthetic process (GO:0030817)	1/19	0.374724	1	2.15703	2.11727	CAP2
positive regulation of cellular response to transforming growth factor beta stimulus (GO:1903846)	1/19	0.374724	1	2.15703	2.11727	HSP90AB1
positive regulation of axon extension (GO:0045773)	1/19	0.374724	1	2.15703	2.11727	SEMA5A
vesicle organization (GO:0016050)	4/127	0.375207	1	1.29082	1.26536	USP8;VPS18;VPS11;SEC22B
cell cycle G2/M phase transition (GO:0044839)	4/127	0.375207	1	1.29082	1.26536	PPP1CB;WEE1;PKMYT1;DYNLL1
protein tetramerization (GO:0051262)	3/90	0.376958	1	1.36612	1.33282	TK1;SOD2;ACACA
regulation of JNK cascade (GO:0046328)	3/90	0.376958	1	1.36612	1.33282	DUSP10;NCOR1;EGFR
cytokine-mediated signaling pathway (GO:0019221)	17/633	0.377545	1	1.10067	1.07212	ARF1;SHC1;ILK;SOD2;HIF1A;TXNDC17;CDC42;PSMC3;TRAF3;IL2RB;BCL2;UBE2N;VIM;PAK2;MCL1;BCL2L1;MAPK3
cellular response to nutrient levels (GO:0031669)	2/54	0.380918	1	1.51791	1.46504	SREBF1;TSC1
negative regulation of supramolecular fiber organization (GO:1902904)	2/54	0.380918	1	1.51791	1.46504	DYRK1A;CAMSAP2
cellular response to acid chemical (GO:0071229)	3/91	0.383592	1	1.35111	1.2946	SETX;NDUFA13;RARG
long-chain fatty acid metabolic process (GO:0001676)	2/55	0.389613	1	1.49031	1.40477	ACAD9;HSD17B4
cell projection assembly (GO:0030031)	1/20	0.389996	1	2.04918	1.92955	CDC42
negative regulation of intracellular protein transport (GO:0090317)	1/20	0.389996	1	2.04918	1.92955	CHORDC1
regulation of epidermal cell differentiation (GO:0045604)	1/20	0.389996	1	2.04918	1.92955	CBFB
regulation of lipoprotein lipase activity (GO:0051004)	1/20	0.389996	1	2.04918	1.92955	NR1H2
mitochondrial respiratory chain complex IV assembly (GO:0033617)	1/20	0.389996	1	2.04918	1.92955	COX17
axon extension (GO:0048675)	1/20	0.389996	1	2.04918	1.92955	CDK5
androgen metabolic process (GO:0008209)	1/20	0.389996	1	2.04918	1.92955	HSD17B4
regulation of cell development (GO:0060284)	1/20	0.389996	1	2.04918	1.92955	ARNTL
negative regulation of protein depolymerization (GO:1901880)	1/20	0.389996	1	2.04918	1.92955	CAMSAP2
regulation of response to cytokine stimulus (GO:0060759)	1/20	0.389996	1	2.04918	1.92955	CBFB
growth hormone receptor signaling pathway (GO:0060396)	1/20	0.389996	1	2.04918	1.92955	MAPK3
inactivation of MAPK activity (GO:0000188)	1/20	0.389996	1	2.04918	1.92955	DUSP10
melanosome localization (GO:0032400)	1/20	0.389996	1	2.04918	1.92955	VPS33A
eye morphogenesis (GO:0048592)	1/20	0.389996	1	2.04918	1.92955	RARG
cellular response to estradiol stimulus (GO:0071392)	1/20	0.389996	1	2.04918	1.92955	EGFR
mitochondrial RNA metabolic process (GO:0000959)	1/20	0.389996	1	2.04918	1.92955	FASTKD1
protein localization to plasma membrane (GO:0072659)	4/130	0.391815	1	1.26103	1.18155	SYS1;WNK3;TMED2;BLZF1
cellular transition metal ion homeostasis (GO:0046916)	3/93	0.396809	1	1.32205	1.22197	ARF1;ATP6AP1;CCDC22
regulation of cysteine-type endopeptidase activity involved in apoptotic process (GO:0043281)	3/93	0.396809	1	1.32205	1.22197	BCAP31;NDUFA13;PPM1F
cotranslational protein targeting to membrane (GO:0006613)	3/93	0.396809	1	1.32205	1.22197	RPS9;SRP72;SEC63
regulation of transcription from RNA polymerase II promoter in response to stress (GO:0043618)	3/93	0.396809	1	1.32205	1.22197	CREBBP;PSMC3;HIF1A
regulation of ERK1 and ERK2 cascade (GO:0070372)	7/247	0.398046	1	1.16148	1.06994	DUSP10;ATP6AP1;SHC1;ERBB2;EGFR;FGFR1;MAPK3
positive regulation of protein transport (GO:0051222)	2/56	0.398253	1	1.4637	1.34758	CHORDC1;ACSL3
protein import (GO:0017038)	2/56	0.398253	1	1.4637	1.34758	NUP133;TSC2
autophagosome organization (GO:1905037)	2/56	0.398253	1	1.4637	1.34758	PIK3C3;AMBRA1
cellular response to hypoxia (GO:0071456)	4/132	0.402852	1	1.24193	1.12914	CREBBP;PSMC3;STUB1;HIF1A
hyaluronan metabolic process (GO:0030212)	1/21	0.404895	1	1.9516	1.7645	CHORDC1
positive regulation of transcription from RNA polymerase II promoter involved in cellular response to chemical stimulus (GO:1901522)	1/21	0.404895	1	1.9516	1.7645	HIF1A
mRNA transcription (GO:0009299)	1/21	0.404895	1	1.9516	1.7645	HIF1A
GTP metabolic process (GO:0046039)	1/21	0.404895	1	1.9516	1.7645	OPA1
establishment of protein localization to vacuole (GO:0072666)	1/21	0.404895	1	1.9516	1.7645	PIK3R4
histone lysine demethylation (GO:0070076)	1/21	0.404895	1	1.9516	1.7645	KDM2A
establishment of spindle orientation (GO:0051294)	1/21	0.404895	1	1.9516	1.7645	NDC80
mitochondrial fission (GO:0000266)	1/21	0.404895	1	1.9516	1.7645	OPA1
phospholipid translocation (GO:0045332)	1/21	0.404895	1	1.9516	1.7645	TMEM30A
positive regulation of lamellipodium organization (GO:1902745)	1/21	0.404895	1	1.9516	1.7645	CDC42
branched-chain amino acid catabolic process (GO:0009083)	1/21	0.404895	1	1.9516	1.7645	DLD
regulation of nuclear division (GO:0051783)	1/21	0.404895	1	1.9516	1.7645	PKMYT1
response to nicotine (GO:0035094)	1/21	0.404895	1	1.9516	1.7645	BCL2
mitochondrial respiratory chain complex IV biogenesis (GO:0097034)	1/21	0.404895	1	1.9516	1.7645	COX17
cellular response to copper ion (GO:0071280)	1/21	0.404895	1	1.9516	1.7645	DAXX
mitochondrial calcium ion transmembrane transport (GO:0006851)	1/21	0.404895	1	1.9516	1.7645	AFG3L2
phosphatidylserine acyl-chain remodeling (GO:0036150)	1/21	0.404895	1	1.9516	1.7645	OSBPL8
ERK1 and ERK2 cascade (GO:0070371)	1/21	0.404895	1	1.9516	1.7645	ZFP36L2
hepaticobiliary system development (GO:0061008)	1/21	0.404895	1	1.9516	1.7645	RARG
glutamate metabolic process (GO:0006536)	1/21	0.404895	1	1.9516	1.7645	GOT2
regulation of glycolytic process (GO:0006110)	2/57	0.406836	1	1.43802	1.29328	NUP133;HIF1A
positive regulation of cell death (GO:0010942)	2/57	0.406836	1	1.43802	1.29328	RARG;DAXX
interleukin-1-mediated signaling pathway (GO:0070498)	3/95	0.409948	1	1.29422	1.15409	PSMC3;UBE2N;MAPK3
regulation of nucleic acid-templated transcription (GO:1903506)	16/607	0.411938	1	1.08029	0.958092	ESRRA;KMT2D;DAXX;CREBBP;CEBPB;NUP133;CNBP;NFYC;ATRX;ASH2L;HIF1A;ARNTL;SFPQ;POLR2A;BHLHE40;UBTF
phospholipid transport (GO:0015914)	2/58	0.415359	1	1.41323	1.24168	OSBPL8;TMEM30A
autophagosome assembly (GO:0000045)	2/58	0.415359	1	1.41323	1.24168	PIK3C3;AMBRA1
epithelial cell differentiation (GO:0030855)	3/96	0.416486	1	1.28074	1.1218	RARG;TAGLN2;E2F8
regulation of canonical Wnt signaling pathway (GO:0060828)	6/213	0.419179	1	1.15447	1.00376	USP8;PSMC3;CUL3;USP34;ILK;ARNTL
regulation of calcium ion transport into cytosol (GO:0010522)	1/22	0.41943	1	1.86289	1.61859	P2RX2
regulation of calcium ion import (GO:0090279)	1/22	0.41943	1	1.86289	1.61859	WNK3
negative regulation of protein polymerization (GO:0032272)	1/22	0.41943	1	1.86289	1.61859	DYRK1A
lipid translocation (GO:0034204)	1/22	0.41943	1	1.86289	1.61859	TMEM30A
activation of phospholipase C activity (GO:0007202)	1/22	0.41943	1	1.86289	1.61859	EGFR
outflow tract septum morphogenesis (GO:0003148)	1/22	0.41943	1	1.86289	1.61859	BMPR1A
hematopoietic progenitor cell differentiation (GO:0002244)	1/22	0.41943	1	1.86289	1.61859	PRRC2C
regulation of DNA biosynthetic process (GO:2000278)	1/22	0.41943	1	1.86289	1.61859	SMG6
cytosolic calcium ion transport (GO:0060401)	1/22	0.41943	1	1.86289	1.61859	AFG3L2
positive regulation of erythrocyte differentiation (GO:0045648)	1/22	0.41943	1	1.86289	1.61859	HIF1A
nucleotide-excision repair, DNA duplex unwinding (GO:0000717)	1/22	0.41943	1	1.86289	1.61859	DDB1
phosphatidylglycerol metabolic process (GO:0046471)	1/22	0.41943	1	1.86289	1.61859	SERAC1
branched-chain amino acid metabolic process (GO:0009081)	1/22	0.41943	1	1.86289	1.61859	DLD
regulation of microtubule depolymerization (GO:0031114)	1/22	0.41943	1	1.86289	1.61859	CAMSAP2
negative regulation of protein import into nucleus (GO:0042308)	1/22	0.41943	1	1.86289	1.61859	CHORDC1
cellular response to unfolded protein (GO:0034620)	1/22	0.41943	1	1.86289	1.61859	DAXX
negative regulation of GTPase activity (GO:0034260)	1/22	0.41943	1	1.86289	1.61859	TMED2
regulation of bone resorption (GO:0045124)	1/22	0.41943	1	1.86289	1.61859	ATP6AP1
positive regulation of phosphatase activity (GO:0010922)	1/22	0.41943	1	1.86289	1.61859	HSP90AB1
regulation of extrinsic apoptotic signaling pathway (GO:2001236)	2/59	0.423821	1	1.38927	1.19262	CFLAR;PAK2
sterol metabolic process (GO:0016125)	2/59	0.423821	1	1.38927	1.19262	FDX1;PMVK
response to UV (GO:0009411)	3/98	0.429488	1	1.2546	1.06034	CREBBP;UBE4B;EGFR
regulation of axon extension involved in axon guidance (GO:0048841)	1/23	0.433612	1	1.7819	1.48896	SEMA5A
cellular response to catecholamine stimulus (GO:0071870)	1/23	0.433612	1	1.7819	1.48896	MAPK3
chromosome condensation (GO:0030261)	1/23	0.433612	1	1.7819	1.48896	ACIN1
negative regulation of viral transcription (GO:0032897)	1/23	0.433612	1	1.7819	1.48896	TFAP4
positive regulation of ERBB signaling pathway (GO:1901186)	1/23	0.433612	1	1.7819	1.48896	RTN4
cellular amino acid catabolic process (GO:0009063)	1/23	0.433612	1	1.7819	1.48896	DLD
glutamine family amino acid metabolic process (GO:0009064)	1/23	0.433612	1	1.7819	1.48896	GOT2
nucleotide-excision repair, DNA damage recognition (GO:0000715)	1/23	0.433612	1	1.7819	1.48896	DDB1
positive regulation of ATP metabolic process (GO:1903580)	1/23	0.433612	1	1.7819	1.48896	HIF1A
cellular response to ammonium ion (GO:0071242)	1/23	0.433612	1	1.7819	1.48896	MAPK3
apoptotic nuclear changes (GO:0030262)	1/23	0.433612	1	1.7819	1.48896	ACIN1
regulation of dendritic spine morphogenesis (GO:0061001)	1/23	0.433612	1	1.7819	1.48896	CDK5
response to alkaloid (GO:0043279)	1/23	0.433612	1	1.7819	1.48896	BCL2
negative regulation of axonogenesis (GO:0050771)	1/23	0.433612	1	1.7819	1.48896	RTN4
regulation of monooxygenase activity (GO:0032768)	1/23	0.433612	1	1.7819	1.48896	EGFR
negative regulation of transcription factor import into nucleus (GO:0042992)	1/23	0.433612	1	1.7819	1.48896	KEAP1
cellular response to amyloid-beta (GO:1904646)	1/23	0.433612	1	1.7819	1.48896	CDK5
positive regulation of monooxygenase activity (GO:0032770)	1/23	0.433612	1	1.7819	1.48896	HIF1A
viral budding (GO:0046755)	1/23	0.433612	1	1.7819	1.48896	CHMP5
regulation of androgen receptor signaling pathway (GO:0060765)	1/23	0.433612	1	1.7819	1.48896	FOXP1
regulation of ion homeostasis (GO:2000021)	1/23	0.433612	1	1.7819	1.48896	WNK3
regulation of angiogenesis (GO:0045765)	5/177	0.434203	1	1.15773	0.965828	SEMA5A;HGS;AGO2;ERBB2;HIF1A
regulation of vesicle-mediated transport (GO:0060627)	4/138	0.435712	1	1.18793	0.986901	SNX17;TSC2;TBC1D10B;MAPK3
steroid metabolic process (GO:0008202)	3/99	0.435951	1	1.24193	1.03108	FDX1;TSPO;HSD17B4
cellular response to cytokine stimulus (GO:0071345)	12/456	0.436137	1	1.07852	0.894952	UPF1;NDUFA13;SHC1;IL2RB;BCL2;PTPN23;UBE2G2;VIM;HIF1A;ZFP36L2;MCL1;BCL2L1
negative regulation of MAP kinase activity (GO:0043407)	2/61	0.44055	1	1.34372	1.10149	DNAJA1;DUSP10
regulation of DNA replication (GO:0006275)	2/61	0.44055	1	1.34372	1.10149	SHC1;EGFR
positive regulation of cellular amide metabolic process (GO:0034250)	2/61	0.44055	1	1.34372	1.10149	ERBB2;VIM
cellular response to transforming growth factor beta stimulus (GO:0071560)	3/100	0.442386	1	1.22951	1.00275	ZFP36L2;UBE2M;BMPR1A
response to lipid (GO:0033993)	4/140	0.446558	1	1.17096	0.944012	RARG;NR1H2;LIAS;FOXP1
positive regulation of histone methylation (GO:0031062)	1/24	0.447448	1	1.70765	1.37329	PAXIP1
negative regulation of protein localization to membrane (GO:1905476)	1/24	0.447448	1	1.70765	1.37329	BCL2L1
response to glucocorticoid (GO:0051384)	1/24	0.447448	1	1.70765	1.37329	ZFP36L2
proteasomal ubiquitin-independent protein catabolic process (GO:0010499)	1/24	0.447448	1	1.70765	1.37329	KEAP1
macromolecule modification (GO:0043412)	1/24	0.447448	1	1.70765	1.37329	LRPPRC
receptor catabolic process (GO:0032801)	1/24	0.447448	1	1.70765	1.37329	PIK3R4
regulation of epidermal growth factor-activated receptor activity (GO:0007176)	1/24	0.447448	1	1.70765	1.37329	SHC1
regulation of transmembrane transport (GO:0034762)	1/24	0.447448	1	1.70765	1.37329	BCL2
regulation of chemotaxis (GO:0050920)	1/24	0.447448	1	1.70765	1.37329	PPM1F
negative regulation of oxidative stress-induced cell death (GO:1903202)	1/24	0.447448	1	1.70765	1.37329	SOD2
cellular senescence (GO:0090398)	1/24	0.447448	1	1.70765	1.37329	OPA1
negative regulation of endothelial cell apoptotic process (GO:2000352)	1/24	0.447448	1	1.70765	1.37329	SEMA5A
mucosal immune response (GO:0002385)	1/24	0.447448	1	1.70765	1.37329	HIST1H2BK
DNA replication initiation (GO:0006270)	1/24	0.447448	1	1.70765	1.37329	POLE2
positive regulation of vascular endothelial growth factor production (GO:0010575)	1/24	0.447448	1	1.70765	1.37329	HIF1A
chaperone mediated protein folding requiring cofactor (GO:0051085)	1/24	0.447448	1	1.70765	1.37329	PTGES3
negative regulation of proteasomal ubiquitin-dependent protein catabolic process (GO:0032435)	1/24	0.447448	1	1.70765	1.37329	HSP90AB1
negative regulation of T cell proliferation (GO:0042130)	1/24	0.447448	1	1.70765	1.37329	CEBPB
negative regulation of intrinsic apoptotic signaling pathway in response to DNA damage (GO:1902230)	1/24	0.447448	1	1.70765	1.37329	BCL2L1
cytoplasmic pattern recognition receptor signaling pathway (GO:0002753)	1/24	0.447448	1	1.70765	1.37329	UBE2N
regulation of cellular senescence (GO:2000772)	1/24	0.447448	1	1.70765	1.37329	ARNTL
organic cation transport (GO:0015695)	1/24	0.447448	1	1.70765	1.37329	SLC25A19
stress-activated MAPK cascade (GO:0051403)	2/62	0.448814	1	1.32205	1.05916	UBE2N;MAPK3
establishment of protein localization to organelle (GO:0072594)	2/62	0.448814	1	1.32205	1.05916	NUP133;TSC2
viral process (GO:0016032)	6/220	0.449446	1	1.11773	0.893896	ARF1;RPS9;NUP133;PCBP2;PAK2;CHMP5
positive regulation of cell migration (GO:0030335)	6/221	0.453745	1	1.11268	0.87926	AGO2;SOD2;HIF1A;EGFR;RTN4;PPM1F
regulation of intracellular signal transduction (GO:1902531)	11/422	0.454855	1	1.06829	0.841577	CDC42;RFC3;RFC4;CDK5;TAF12;RPA1;RICTOR;ATRIP;PAK2;EGFR;MAPK3
oligosaccharide metabolic process (GO:0009311)	2/63	0.457009	1	1.30107	1.0188	MGAT2;MPDU1
negative regulation of dephosphorylation (GO:0035305)	2/63	0.457009	1	1.30107	1.0188	CHORDC1;PKMYT1
Fc-epsilon receptor signaling pathway (GO:0038095)	5/182	0.458028	1	1.12592	0.87915	PSMC3;SHC1;UBE2N;PAK2;MAPK3
negative regulation of wound healing (GO:0061045)	1/25	0.460946	1	1.63934	1.26963	DUSP10
regulation of centrosome duplication (GO:0010824)	1/25	0.460946	1	1.63934	1.26963	CHMP5
response to copper ion (GO:0046688)	1/25	0.460946	1	1.63934	1.26963	DAXX
glial cell differentiation (GO:0010001)	1/25	0.460946	1	1.63934	1.26963	CDK5
nucleotide-binding domain, leucine rich repeat containing receptor signaling pathway (GO:0035872)	1/25	0.460946	1	1.63934	1.26963	UBE2N
regulation of protein ubiquitination involved in ubiquitin-dependent protein catabolic process (GO:2000058)	1/25	0.460946	1	1.63934	1.26963	CCDC22
response to amyloid-beta (GO:1904645)	1/25	0.460946	1	1.63934	1.26963	CDK5
positive regulation of nuclear division (GO:0051785)	1/25	0.460946	1	1.63934	1.26963	DMRT1
regulation of DNA damage response, signal transduction by p53 class mediator (GO:0043516)	1/25	0.460946	1	1.63934	1.26963	DYRK1A
positive regulation of filopodium assembly (GO:0051491)	1/25	0.460946	1	1.63934	1.26963	CDC42
regulation of lamellipodium assembly (GO:0010591)	1/25	0.460946	1	1.63934	1.26963	CDC42
regulation of glucose metabolic process (GO:0010906)	1/25	0.460946	1	1.63934	1.26963	DGKQ
negative regulation of cellular protein localization (GO:1903828)	1/25	0.460946	1	1.63934	1.26963	DNAJA1
female gamete generation (GO:0007292)	1/25	0.460946	1	1.63934	1.26963	KMT2D
regulation of apoptotic signaling pathway (GO:2001233)	1/25	0.460946	1	1.63934	1.26963	BCL2
regulation of viral release from host cell (GO:1902186)	1/25	0.460946	1	1.63934	1.26963	DDB1
regulation of potassium ion transmembrane transporter activity (GO:1901016)	1/25	0.460946	1	1.63934	1.26963	KCNE2
regulation of vascular smooth muscle cell proliferation (GO:1904705)	1/25	0.460946	1	1.63934	1.26963	BMPR1A
regulation of cellular protein localization (GO:1903827)	1/25	0.460946	1	1.63934	1.26963	GBF1
positive regulation of nitric oxide biosynthetic process (GO:0045429)	1/25	0.460946	1	1.63934	1.26963	HSP90AB1
positive regulation of peptidyl-threonine phosphorylation (GO:0010800)	1/25	0.460946	1	1.63934	1.26963	WNK3
positive regulation of nitric oxide metabolic process (GO:1904407)	1/25	0.460946	1	1.63934	1.26963	HSP90AB1
regulation of protein import into nucleus (GO:0042306)	1/25	0.460946	1	1.63934	1.26963	CHORDC1
phosphate-containing compound metabolic process (GO:0006796)	5/183	0.46276	1	1.11977	0.862835	DUSP10;CDK5;DUSP28;PAK2;MAPK3
Fc receptor signaling pathway (GO:0038093)	5/183	0.46276	1	1.11977	0.862835	PSMC3;SHC1;UBE2N;PAK2;MAPK3
glucose metabolic process (GO:0006006)	2/64	0.465133	1	1.28074	0.980318	SLC25A1;GOT2
positive regulation of cell adhesion (GO:0045785)	2/64	0.465133	1	1.28074	0.980318	ERBB2;PPM1F
positive regulation of vasculature development (GO:1904018)	3/104	0.467827	1	1.18222	0.89808	SEMA5A;AGO2;HIF1A
transmembrane receptor protein serine/threonine kinase signaling pathway (GO:0007178)	4/144	0.468048	1	1.13843	0.864282	STUB1;UBE2M;BMPR1A;MAPK3
positive regulation of cyclin-dependent protein kinase activity (GO:1904031)	1/26	0.474115	1	1.57629	1.17639	CKS1B
bile acid biosynthetic process (GO:0006699)	1/26	0.474115	1	1.57629	1.17639	HSD17B4
positive regulation of glucose import (GO:0046326)	1/26	0.474115	1	1.57629	1.17639	OSBPL8
cytoskeleton-dependent intracellular transport (GO:0030705)	1/26	0.474115	1	1.57629	1.17639	DYNLL1
snRNA processing (GO:0016180)	1/26	0.474115	1	1.57629	1.17639	INTS10
regulation of centrosome cycle (GO:0046605)	1/26	0.474115	1	1.57629	1.17639	CHMP5
regulation of pri-miRNA transcription from RNA polymerase II promoter (GO:1902893)	1/26	0.474115	1	1.57629	1.17639	HIF1A
regulation of p38MAPK cascade (GO:1900744)	1/26	0.474115	1	1.57629	1.17639	DUSP10
negative chemotaxis (GO:0050919)	1/26	0.474115	1	1.57629	1.17639	SEMA5A
regulation of supramolecular fiber organization (GO:1902903)	1/26	0.474115	1	1.57629	1.17639	CAMSAP2
fat-soluble vitamin metabolic process (GO:0006775)	1/26	0.474115	1	1.57629	1.17639	UBIAD1
endocrine system development (GO:0035270)	1/26	0.474115	1	1.57629	1.17639	THRA
regulation of rhodopsin mediated signaling pathway (GO:0022400)	1/26	0.474115	1	1.57629	1.17639	RNF7
cellular response to light stimulus (GO:0071482)	2/66	0.481163	1	1.24193	0.908532	CREBBP;RNF7
JNK cascade (GO:0007254)	2/66	0.481163	1	1.24193	0.908532	DAXX;UBE2N
viral life cycle (GO:0019058)	3/107	0.486565	1	1.14907	0.827775	HSP90AB1;NUP133;CHMP5
regulation of response to external stimulus (GO:0032101)	3/107	0.486565	1	1.14907	0.827775	TRAF3;RNF7;FOXP1
regulation of intracellular steroid hormone receptor signaling pathway (GO:0033143)	1/27	0.486964	1	1.51791	1.09224	CBFB
negative regulation of synaptic transmission (GO:0050805)	1/27	0.486964	1	1.51791	1.09224	ARF1
regulation of double-strand break repair via homologous recombination (GO:0010569)	1/27	0.486964	1	1.51791	1.09224	SIRT6
transition metal ion transport (GO:0000041)	1/27	0.486964	1	1.51791	1.09224	COX17
transcription from RNA polymerase III promoter (GO:0006383)	1/27	0.486964	1	1.51791	1.09224	ICE2
purine ribonucleoside triphosphate biosynthetic process (GO:0009206)	1/27	0.486964	1	1.51791	1.09224	ATP5O
phosphatidylserine metabolic process (GO:0006658)	1/27	0.486964	1	1.51791	1.09224	OSBPL8
positive regulation of substrate adhesion-dependent cell spreading (GO:1900026)	1/27	0.486964	1	1.51791	1.09224	CDC42
regulation of vascular endothelial growth factor production (GO:0010574)	1/27	0.486964	1	1.51791	1.09224	HIF1A
regulation of autophagy of mitochondrion (GO:1903146)	1/27	0.486964	1	1.51791	1.09224	SREBF1
negative regulation of protein serine/threonine kinase activity (GO:0071901)	2/67	0.489066	1	1.22339	0.87504	HEXIM1;TFAP4
insulin receptor signaling pathway (GO:0008286)	2/67	0.489066	1	1.22339	0.87504	ATP6AP1;SHC1
positive regulation of autophagy (GO:0010508)	2/67	0.489066	1	1.22339	0.87504	NPRL2;TSC2
cellular response to UV (GO:0034644)	2/67	0.489066	1	1.22339	0.87504	DDB1;CREBBP
DNA-templated transcription, elongation (GO:0006354)	3/108	0.49274	1	1.13843	0.805753	POLR2A;TAF12;UBTF
monocarboxylic acid metabolic process (GO:0032787)	3/108	0.49274	1	1.13843	0.805753	GOT2;DLD;ACACA
regulation of cytokine production (GO:0001817)	3/108	0.49274	1	1.13843	0.805753	TRAF3;DDX41;FOXP1
negative regulation of hydrolase activity (GO:0051346)	3/108	0.49274	1	1.13843	0.805753	CHORDC1;TMED2;PKMYT1
protein homooligomerization (GO:0051260)	5/190	0.495517	1	1.07852	0.757284	DGKD;P2RX2;TK1;SOD2;ACACA
protein sumoylation (GO:0016925)	2/68	0.496894	1	1.2054	0.843032	NUP133;SENP1
negative regulation of phosphatase activity (GO:0010923)	2/68	0.496894	1	1.2054	0.843032	CHORDC1;PKMYT1
monocarboxylic acid biosynthetic process (GO:0072330)	2/68	0.496894	1	1.2054	0.843032	HSD17B4;ACACA
peptidyl-threonine phosphorylation (GO:0018107)	2/68	0.496894	1	1.2054	0.843032	CDK5;DYRK1A
regulation of vasculature development (GO:1901342)	1/28	0.499499	1	1.4637	1.01603	ERBB2
negative regulation of endocytosis (GO:0045806)	1/28	0.499499	1	1.4637	1.01603	NR1H2
cellular response to hydrogen peroxide (GO:0070301)	1/28	0.499499	1	1.4637	1.01603	SETX
negative regulation of homeostatic process (GO:0032845)	1/28	0.499499	1	1.4637	1.01603	BCL2
carboxylic acid catabolic process (GO:0046395)	1/28	0.499499	1	1.4637	1.01603	CHORDC1
RNA phosphodiester bond hydrolysis (GO:0090501)	1/28	0.499499	1	1.4637	1.01603	MRPL44
negative regulation of proteasomal protein catabolic process (GO:1901799)	1/28	0.499499	1	1.4637	1.01603	HSP90AB1
acute inflammatory response (GO:0002526)	1/28	0.499499	1	1.4637	1.01603	CEBPB
cellular amino acid biosynthetic process (GO:0008652)	1/28	0.499499	1	1.4637	1.01603	GOT2
regulation of mRNA processing (GO:0050684)	1/28	0.499499	1	1.4637	1.01603	SAFB
regulation of receptor internalization (GO:0002090)	1/28	0.499499	1	1.4637	1.01603	ARF1
positive regulation of extrinsic apoptotic signaling pathway (GO:2001238)	1/28	0.499499	1	1.4637	1.01603	PAK2
organelle fission (GO:0048285)	1/28	0.499499	1	1.4637	1.01603	OPA1
cardiac muscle cell action potential involved in contraction (GO:0086002)	1/28	0.499499	1	1.4637	1.01603	KCNE2
positive regulation of calcium-mediated signaling (GO:0050850)	1/28	0.499499	1	1.4637	1.01603	P2RX2
regulation of lipid biosynthetic process (GO:0046890)	1/28	0.499499	1	1.4637	1.01603	FITM2
triglyceride homeostasis (GO:0070328)	1/28	0.499499	1	1.4637	1.01603	FITM2
dopamine receptor signaling pathway (GO:0007212)	1/28	0.499499	1	1.4637	1.01603	GNAS
regulation of fatty acid biosynthetic process (GO:0042304)	1/28	0.499499	1	1.4637	1.01603	NR1H2
nucleotide-binding oligomerization domain containing signaling pathway (GO:0070423)	1/28	0.499499	1	1.4637	1.01603	UBE2N
calcium ion import (GO:0070509)	1/28	0.499499	1	1.4637	1.01603	AFG3L2
regulation of adenylate cyclase activity (GO:0045761)	1/28	0.499499	1	1.4637	1.01603	CAP2
protein K63-linked deubiquitination (GO:0070536)	1/28	0.499499	1	1.4637	1.01603	USP8
regulation of cell morphogenesis (GO:0022604)	1/28	0.499499	1	1.4637	1.01603	FITM2
protein export from nucleus (GO:0006611)	1/28	0.499499	1	1.4637	1.01603	CHORDC1
primary neural tube formation (GO:0014020)	1/28	0.499499	1	1.4637	1.01603	TSC2
transcription elongation from RNA polymerase I promoter (GO:0006362)	1/28	0.499499	1	1.4637	1.01603	UBTF
negative regulation of cell differentiation (GO:0045596)	4/150	0.499689	1	1.0929	0.758217	NR1H2;ZFP36L2;EGFR;ARNTL
translation (GO:0006412)	6/232	0.500431	1	1.05992	0.733768	EEFSEC;EEF1G;RPS9;AGO2;MRPS18A;MRPL23
cellular response to oxygen-containing compound (GO:1901701)	7/274	0.5045	1	1.04703	0.716362	SETX;UPF1;RARG;NDUFA13;NR1H2;EGFR;MAPK3
activation of protein kinase activity (GO:0032147)	6/233	0.50461	1	1.05537	0.721842	OSBPL8;SHC1;UBE2N;RICTOR;PAK2;MAPK3
regulation of endocytosis (GO:0030100)	2/69	0.504644	1	1.18793	0.812427	SNX17;TSC2
regulation of osteoblast differentiation (GO:0045667)	2/69	0.504644	1	1.18793	0.812427	ATP6AP1;BMPR1A
response to organic cyclic compound (GO:0014070)	2/69	0.504644	1	1.18793	0.812427	TIPARP;BCL2
regulation of macrophage derived foam cell differentiation (GO:0010743)	1/29	0.511728	1	1.41323	0.946809	NR1H2
very long-chain fatty acid metabolic process (GO:0000038)	1/29	0.511728	1	1.41323	0.946809	ACAD9
synaptic vesicle endocytosis (GO:0048488)	1/29	0.511728	1	1.41323	0.946809	CDK5
keratan sulfate biosynthetic process (GO:0018146)	1/29	0.511728	1	1.41323	0.946809	B3GNT2
TRIF-dependent toll-like receptor signaling pathway (GO:0035666)	1/29	0.511728	1	1.41323	0.946809	TRAF3
tube closure (GO:0060606)	1/29	0.511728	1	1.41323	0.946809	TSC2
superoxide metabolic process (GO:0006801)	1/29	0.511728	1	1.41323	0.946809	SOD2
cardiac muscle cell action potential (GO:0086001)	1/29	0.511728	1	1.41323	0.946809	KCNE2
positive regulation of myeloid cell differentiation (GO:0045639)	1/29	0.511728	1	1.41323	0.946809	HIF1A
protein alkylation (GO:0008213)	1/29	0.511728	1	1.41323	0.946809	SNRPB
negative regulation of Notch signaling pathway (GO:0045746)	1/29	0.511728	1	1.41323	0.946809	EGFR
regulation of embryonic development (GO:0045995)	1/29	0.511728	1	1.41323	0.946809	CDX2
negative regulation of lymphocyte proliferation (GO:0050672)	1/29	0.511728	1	1.41323	0.946809	CEBPB
regulation of chromosome segregation (GO:0051983)	1/29	0.511728	1	1.41323	0.946809	CDC42
regulation of keratinocyte differentiation (GO:0045616)	1/29	0.511728	1	1.41323	0.946809	CBFB
coenzyme biosynthetic process (GO:0009108)	1/29	0.511728	1	1.41323	0.946809	LIAS
negative regulation of epithelial cell apoptotic process (GO:1904036)	1/29	0.511728	1	1.41323	0.946809	SEMA5A
B cell proliferation (GO:0042100)	1/29	0.511728	1	1.41323	0.946809	BCL2
synaptic vesicle recycling (GO:0036465)	1/29	0.511728	1	1.41323	0.946809	CDK5
skeletal muscle organ development (GO:0060538)	1/29	0.511728	1	1.41323	0.946809	CFLAR
amino acid transmembrane transport (GO:0003333)	1/29	0.511728	1	1.41323	0.946809	SLC7A11
regulation of cellular biosynthetic process (GO:0031326)	1/29	0.511728	1	1.41323	0.946809	FITM2
carbohydrate derivative biosynthetic process (GO:1901137)	1/29	0.511728	1	1.41323	0.946809	ALG8
regulation of Notch signaling pathway (GO:0008593)	2/70	0.512317	1	1.17096	0.783151	CREBBP;EGFR
stress-activated protein kinase signaling cascade (GO:0031098)	2/70	0.512317	1	1.17096	0.783151	PAK2;MAPK3
vascular endothelial growth factor receptor signaling pathway (GO:0048010)	2/70	0.512317	1	1.17096	0.783151	CDC42;PAK2
phospholipid metabolic process (GO:0006644)	2/70	0.512317	1	1.17096	0.783151	PCYT2;FITM2
calcium-mediated signaling (GO:0019722)	2/70	0.512317	1	1.17096	0.783151	BCAP31;EGFR
cellular response to tumor necrosis factor (GO:0071356)	5/194	0.5139	1	1.05628	0.703193	PSMC3;TRAF3;ILK;ZFP36L2;TXNDC17
phosphatidylcholine metabolic process (GO:0046470)	2/71	0.519911	1	1.15447	0.755134	PCYT1A;CEPT1
acylglycerol catabolic process (GO:0046464)	1/30	0.523659	1	1.36612	0.883763	ABHD16A
negative regulation of transferase activity (GO:0051348)	1/30	0.523659	1	1.36612	0.883763	NPRL2
activation of JUN kinase activity (GO:0007257)	1/30	0.523659	1	1.36612	0.883763	DAXX
regulation of cation transmembrane transport (GO:1904062)	1/30	0.523659	1	1.36612	0.883763	KCNE2
'de novo' posttranslational protein folding (GO:0051084)	1/30	0.523659	1	1.36612	0.883763	PTGES3
MyD88-independent toll-like receptor signaling pathway (GO:0002756)	1/30	0.523659	1	1.36612	0.883763	TRAF3
phosphatidylinositol 3-kinase signaling (GO:0014065)	1/30	0.523659	1	1.36612	0.883763	ERBB2
artery morphogenesis (GO:0048844)	1/30	0.523659	1	1.36612	0.883763	BMPR1A
response to estradiol (GO:0032355)	1/30	0.523659	1	1.36612	0.883763	EGFR
positive regulation of B cell proliferation (GO:0030890)	1/30	0.523659	1	1.36612	0.883763	BCL2
regulation of protein polymerization (GO:0032271)	1/30	0.523659	1	1.36612	0.883763	CAMSAP2
CENP-A containing nucleosome assembly (GO:0034080)	1/30	0.523659	1	1.36612	0.883763	CENPN
CENP-A containing chromatin organization (GO:0061641)	1/30	0.523659	1	1.36612	0.883763	CENPN
bile acid metabolic process (GO:0008206)	1/30	0.523659	1	1.36612	0.883763	HSD17B4
negative regulation of cell morphogenesis involved in differentiation (GO:0010771)	1/30	0.523659	1	1.36612	0.883763	RTN4
positive regulation of reactive oxygen species biosynthetic process (GO:1903428)	1/30	0.523659	1	1.36612	0.883763	HSP90AB1
response to lipopolysaccharide (GO:0032496)	4/155	0.525422	1	1.05764	0.680649	UPF1;NR1H2;LIAS;FOXP1
Rho protein signal transduction (GO:0007266)	2/72	0.527426	1	1.13843	0.728308	CDC42;PAK2
SCF-dependent proteasomal ubiquitin-dependent protein catabolic process (GO:0031146)	2/72	0.527426	1	1.13843	0.728308	PSMC3;RNF7
B cell activation (GO:0042113)	2/73	0.534861	1	1.12284	0.702614	KLF6;BCL2
protein O-linked glycosylation (GO:0006493)	3/115	0.534888	1	1.06914	0.668958	DPM1;DPM2;B3GNT2
regulation of dendritic spine development (GO:0060998)	1/31	0.535299	1	1.32205	0.826189	CDK5
regulation of protein tyrosine kinase activity (GO:0061097)	1/31	0.535299	1	1.32205	0.826189	SHC1
secondary alcohol metabolic process (GO:1902652)	1/31	0.535299	1	1.32205	0.826189	FDX1
positive regulation of viral genome replication (GO:0045070)	1/31	0.535299	1	1.32205	0.826189	DDB1
regulation of protein autophosphorylation (GO:0031952)	1/31	0.535299	1	1.32205	0.826189	CHORDC1
termination of RNA polymerase I transcription (GO:0006363)	1/31	0.535299	1	1.32205	0.826189	UBTF
regulation of cytokine secretion (GO:0050707)	1/31	0.535299	1	1.32205	0.826189	FOXP1
positive regulation of bone mineralization (GO:0030501)	1/31	0.535299	1	1.32205	0.826189	BMPR1A
mitotic spindle organization (GO:0007052)	2/74	0.542216	1	1.10767	0.677992	KIF23;NDC80
7-methylguanosine mRNA capping (GO:0006370)	1/32	0.546655	1	1.28074	0.773484	POLR2A
positive regulation of calcium ion transport into cytosol (GO:0010524)	1/32	0.546655	1	1.28074	0.773484	P2RX2
cellular response to amino acid stimulus (GO:0071230)	1/32	0.546655	1	1.28074	0.773484	UBR2
sister chromatid segregation (GO:0000819)	1/32	0.546655	1	1.28074	0.773484	NDC80
chromatin remodeling at centromere (GO:0031055)	1/32	0.546655	1	1.28074	0.773484	CENPN
microtubule bundle formation (GO:0001578)	1/32	0.546655	1	1.28074	0.773484	CHORDC1
cyclic-nucleotide-mediated signaling (GO:0019935)	1/32	0.546655	1	1.28074	0.773484	DGKQ
7-methylguanosine RNA capping (GO:0009452)	1/32	0.546655	1	1.28074	0.773484	POLR2A
regulation of potassium ion transmembrane transport (GO:1901379)	1/32	0.546655	1	1.28074	0.773484	KCNE2
ATP biosynthetic process (GO:0006754)	1/32	0.546655	1	1.28074	0.773484	ATP5O
positive regulation of TOR signaling (GO:0032008)	1/32	0.546655	1	1.28074	0.773484	RICTOR
activation of adenylate cyclase activity (GO:0007190)	1/32	0.546655	1	1.28074	0.773484	CAP2
endodermal cell differentiation (GO:0035987)	1/32	0.546655	1	1.28074	0.773484	COL8A1
substrate adhesion-dependent cell spreading (GO:0034446)	1/32	0.546655	1	1.28074	0.773484	ILK
positive regulation of telomere maintenance via telomerase (GO:0032212)	1/32	0.546655	1	1.28074	0.773484	MAPK3
positive regulation of T cell differentiation (GO:0045582)	1/32	0.546655	1	1.28074	0.773484	DUSP10
regulation of erythrocyte differentiation (GO:0045646)	1/32	0.546655	1	1.28074	0.773484	HIF1A
regulation of nitric oxide biosynthetic process (GO:0045428)	1/32	0.546655	1	1.28074	0.773484	HSP90AB1
mismatch repair (GO:0006298)	1/32	0.546655	1	1.28074	0.773484	RPA1
positive regulation of myeloid leukocyte differentiation (GO:0002763)	1/32	0.546655	1	1.28074	0.773484	ACIN1
regulation of defense response (GO:0031347)	2/75	0.549489	1	1.0929	0.65439	TRAF3;FOXP1
antigen processing and presentation of exogenous peptide antigen via MHC class I, TAP-dependent (GO:0002479)	2/75	0.549489	1	1.0929	0.65439	PSMC3;SEC22B
gland development (GO:0048732)	2/75	0.549489	1	1.0929	0.65439	RARG;THRA
cAMP-mediated signaling (GO:0019933)	2/75	0.549489	1	1.0929	0.65439	DGKQ;GNAS
transforming growth factor beta receptor signaling pathway (GO:0007179)	2/76	0.556681	1	1.07852	0.631755	BMPR1A;UBE2M
regulation of hematopoietic stem cell differentiation (GO:1902036)	2/76	0.556681	1	1.07852	0.631755	CBFB;PSMC3
nucleic acid-templated transcription (GO:0097659)	2/76	0.556681	1	1.07852	0.631755	POLR2A;ASH2L
response to interleukin-1 (GO:0070555)	2/76	0.556681	1	1.07852	0.631755	UPF1;HIF1A
positive regulation of adenylate cyclase activity (GO:0045762)	1/33	0.557735	1	1.24193	0.725126	CAP2
positive regulation of cell-cell adhesion (GO:0022409)	1/33	0.557735	1	1.24193	0.725126	PTPN23
positive regulation of cytokine-mediated signaling pathway (GO:0001961)	1/33	0.557735	1	1.24193	0.725126	HIF1A
regulation of T cell differentiation (GO:0045580)	1/33	0.557735	1	1.24193	0.725126	CBFB
oligosaccharide biosynthetic process (GO:0009312)	1/33	0.557735	1	1.24193	0.725126	MPDU1
neural tube closure (GO:0001843)	1/33	0.557735	1	1.24193	0.725126	TSC2
tRNA-containing ribonucleoprotein complex export from nucleus (GO:0071431)	1/33	0.557735	1	1.24193	0.725126	NUP133
tRNA export from nucleus (GO:0006409)	1/33	0.557735	1	1.24193	0.725126	NUP133
embryonic organ morphogenesis (GO:0048562)	1/33	0.557735	1	1.24193	0.725126	RARG
positive regulation of catalytic activity (GO:0043085)	1/33	0.557735	1	1.24193	0.725126	MAPK3
establishment or maintenance of epithelial cell apical/basal polarity (GO:0045197)	1/33	0.557735	1	1.24193	0.725126	CDC42
regulation of DNA recombination (GO:0000018)	1/33	0.557735	1	1.24193	0.725126	SIRT6
positive regulation of biomineral tissue development (GO:0070169)	1/33	0.557735	1	1.24193	0.725126	BMPR1A
positive regulation of Notch signaling pathway (GO:0045747)	1/33	0.557735	1	1.24193	0.725126	CREBBP
negative regulation of multi-organism process (GO:0043901)	1/33	0.557735	1	1.24193	0.725126	PCBP2
regulation of interleukin-12 production (GO:0032655)	1/33	0.557735	1	1.24193	0.725126	FOXP1
positive regulation of B cell activation (GO:0050871)	3/119	0.558063	1	1.0332	0.602648	PAXIP1;PPP2R3C;BCL2
regulation of neuron projection development (GO:0010975)	3/119	0.558063	1	1.0332	0.602648	SETX;RTN4IP1;CAMSAP2
regulation of I-kappaB kinase/NF-kappaB signaling (GO:0043122)	5/204	0.558569	1	1.0045	0.584998	TFG;GOLT1B;UBE2N;CCDC22;CFLAR
water-soluble vitamin metabolic process (GO:0006767)	2/77	0.56379	1	1.06451	0.610041	SLC25A19;ACACA
regulation of hematopoietic progenitor cell differentiation (GO:1901532)	2/77	0.56379	1	1.06451	0.610041	CBFB;PSMC3
regulation of double-strand break repair (GO:2000779)	1/34	0.568544	1	1.2054	0.680662	SIRT6
negative regulation of DNA binding (GO:0043392)	1/34	0.568544	1	1.2054	0.680662	TFAP4
ncRNA metabolic process (GO:0034660)	1/34	0.568544	1	1.2054	0.680662	AGO2
keratan sulfate metabolic process (GO:0042339)	1/34	0.568544	1	1.2054	0.680662	B3GNT2
positive regulation of muscle cell differentiation (GO:0051149)	1/34	0.568544	1	1.2054	0.680662	CDC42
positive regulation of telomere maintenance via telomere lengthening (GO:1904358)	1/34	0.568544	1	1.2054	0.680662	MAPK3
positive regulation of DNA binding (GO:0043388)	1/34	0.568544	1	1.2054	0.680662	MAU2
ventricular cardiac muscle tissue morphogenesis (GO:0055010)	1/34	0.568544	1	1.2054	0.680662	BMPR1A
negative regulation of T cell activation (GO:0050868)	1/34	0.568544	1	1.2054	0.680662	CEBPB
regulation of axon extension (GO:0030516)	1/34	0.568544	1	1.2054	0.680662	RTN4
positive regulation of cell development (GO:0010720)	1/34	0.568544	1	1.2054	0.680662	ATP6AP1
positive regulation of chemokine production (GO:0032722)	1/34	0.568544	1	1.2054	0.680662	HIF1A
regulation of interleukin-1 beta secretion (GO:0050706)	1/34	0.568544	1	1.2054	0.680662	FOXP1
anterior/posterior pattern specification (GO:0009952)	1/34	0.568544	1	1.2054	0.680662	CDX2
regulation of interferon-beta production (GO:0032648)	1/34	0.568544	1	1.2054	0.680662	TRAF3
macromolecule catabolic process (GO:0009057)	1/34	0.568544	1	1.2054	0.680662	PIK3R4
negative regulation of cell migration (GO:0030336)	3/121	0.569388	1	1.01612	0.572273	DUSP10;PTPN23;BMPR1A
sensory perception of mechanical stimulus (GO:0050954)	2/78	0.570818	1	1.05086	0.589202	NDUFB9;P2RX2
antigen processing and presentation of exogenous peptide antigen via MHC class I (GO:0042590)	2/78	0.570818	1	1.05086	0.589202	PSMC3;SEC22B
visual perception (GO:0007601)	2/78	0.570818	1	1.05086	0.589202	OPA1;ZIC2
negative regulation of mitotic cell cycle phase transition (GO:1901991)	2/79	0.577763	1	1.03756	0.569196	PSMC3;ZFP36L2
activation of cysteine-type endopeptidase activity involved in apoptotic process (GO:0006919)	2/79	0.577763	1	1.03756	0.569196	CFLAR;SENP1
regulation of endothelial cell proliferation (GO:0001936)	2/79	0.577763	1	1.03756	0.569196	SEMA5A;HIF1A
response to calcium ion (GO:0051592)	2/79	0.577763	1	1.03756	0.569196	IQGAP1;SEC31A
regulation of transforming growth factor beta receptor signaling pathway (GO:0017015)	2/79	0.577763	1	1.03756	0.569196	HSP90AB1;STUB1
regulation of cyclin-dependent protein kinase activity (GO:1904029)	1/35	0.579089	1	1.17096	0.639694	PKMYT1
regulation of heart rate by cardiac conduction (GO:0086091)	1/35	0.579089	1	1.17096	0.639694	KCNE2
antibacterial humoral response (GO:0019731)	1/35	0.579089	1	1.17096	0.639694	HIST1H2BK
negative regulation of protein kinase B signaling (GO:0051898)	1/35	0.579089	1	1.17096	0.639694	TSC2
regulation of endothelial cell apoptotic process (GO:2000351)	1/35	0.579089	1	1.17096	0.639694	SEMA5A
erythrocyte differentiation (GO:0030218)	1/35	0.579089	1	1.17096	0.639694	ACIN1
tRNA transport (GO:0051031)	1/35	0.579089	1	1.17096	0.639694	NUP133
regulation of sodium ion transport (GO:0002028)	1/35	0.579089	1	1.17096	0.639694	WNK3
regulation of synapse assembly (GO:0051963)	1/35	0.579089	1	1.17096	0.639694	VPS35
regulation of ion transmembrane transport (GO:0034765)	1/35	0.579089	1	1.17096	0.639694	KCNE2
positive regulation of ATPase activity (GO:0032781)	1/35	0.579089	1	1.17096	0.639694	DYNLL1
carboxylic acid transmembrane transport (GO:1905039)	1/35	0.579089	1	1.17096	0.639694	SLC7A11
NIK/NF-kappaB signaling (GO:0038061)	2/80	0.584626	1	1.02459	0.549982	PSMC3;UBE2M
regulation of protein serine/threonine kinase activity (GO:0071900)	2/80	0.584626	1	1.02459	0.549982	HGS;PKMYT1
negative regulation of defense response (GO:0031348)	2/80	0.584626	1	1.02459	0.549982	PCBP2;VPS35
negative regulation of macromolecule metabolic process (GO:0010605)	3/124	0.586035	1	0.991539	0.529854	TIPARP;DGKQ;HIF1A
regulation of potassium ion transport (GO:0043266)	1/36	0.589377	1	1.13843	0.601877	KCNE2
actin polymerization or depolymerization (GO:0008154)	1/36	0.589377	1	1.13843	0.601877	CAP2
regulation of receptor-mediated endocytosis (GO:0048259)	1/36	0.589377	1	1.13843	0.601877	ARF1
histone exchange (GO:0043486)	1/36	0.589377	1	1.13843	0.601877	CENPN
carbohydrate biosynthetic process (GO:0016051)	1/36	0.589377	1	1.13843	0.601877	MPDU1
regulation of smoothened signaling pathway (GO:0008589)	1/36	0.589377	1	1.13843	0.601877	CREBBP
regulation of muscle cell differentiation (GO:0051147)	1/36	0.589377	1	1.13843	0.601877	CDC42
transferrin transport (GO:0033572)	1/36	0.589377	1	1.13843	0.601877	ATP6AP1
lymphocyte proliferation (GO:0046651)	1/36	0.589377	1	1.13843	0.601877	BCL2
endoderm formation (GO:0001706)	1/36	0.589377	1	1.13843	0.601877	COL8A1
regulation of filopodium assembly (GO:0051489)	1/36	0.589377	1	1.13843	0.601877	CDC42
vesicle-mediated transport in synapse (GO:0099003)	1/36	0.589377	1	1.13843	0.601877	CDK5
ferric iron transport (GO:0015682)	1/36	0.589377	1	1.13843	0.601877	ATP6AP1
centromere complex assembly (GO:0034508)	1/36	0.589377	1	1.13843	0.601877	CENPN
Wnt signaling pathway, calcium modulating pathway (GO:0007223)	1/36	0.589377	1	1.13843	0.601877	AGO2
BMP signaling pathway (GO:0030509)	2/81	0.591406	1	1.01194	0.531524	MAPK3;BMPR1A
sensory perception of light stimulus (GO:0050953)	2/81	0.591406	1	1.01194	0.531524	OPA1;ZIC2
negative regulation of cell death (GO:0060548)	2/81	0.591406	1	1.01194	0.531524	CDK5;VPS35
sensory perception of sound (GO:0007605)	2/81	0.591406	1	1.01194	0.531524	NDUFB9;P2RX2
protein catabolic process (GO:0030163)	2/81	0.591406	1	1.01194	0.531524	DDB1;UBE2G2
negative regulation of multicellular organismal process (GO:0051241)	3/125	0.591493	1	0.983607	0.516498	DUSP10;PTPN23;EGFR
positive regulation of transmembrane receptor protein serine/threonine kinase signaling pathway (GO:0090100)	2/82	0.598103	1	0.9996	0.513786	HSP90AB1;BMPR1A
epithelial to mesenchymal transition (GO:0001837)	1/37	0.599415	1	1.10767	0.566905	HIF1A
spliceosomal snRNP assembly (GO:0000387)	1/37	0.599415	1	1.10767	0.566905	SNRPB
base-excision repair (GO:0006284)	1/37	0.599415	1	1.10767	0.566905	RPA1
positive regulation of receptor activity (GO:2000273)	1/37	0.599415	1	1.10767	0.566905	ALG10B
regulation of sodium ion transmembrane transporter activity (GO:2000649)	1/37	0.599415	1	1.10767	0.566905	WNK3
regulation of osteoclast differentiation (GO:0045670)	1/37	0.599415	1	1.10767	0.566905	CEBPB
regulation of carbohydrate catabolic process (GO:0043470)	1/37	0.599415	1	1.10767	0.566905	NUP133
negative regulation of Ras protein signal transduction (GO:0046580)	1/37	0.599415	1	1.10767	0.566905	CUL3
regulation of metal ion transport (GO:0010959)	1/37	0.599415	1	1.10767	0.566905	BCL2
positive regulation of multi-organism process (GO:0043902)	1/37	0.599415	1	1.10767	0.566905	AGO2
organic cyclic compound biosynthetic process (GO:1901362)	1/37	0.599415	1	1.10767	0.566905	LIAS
protein lipidation (GO:0006497)	3/127	0.602267	1	0.968117	0.490888	DPM1;DPM2;PIK3C3
non-canonical Wnt signaling pathway (GO:0035567)	3/127	0.602267	1	0.968117	0.490888	CDC42;PSMC3;AGO2
positive regulation of protein kinase activity (GO:0045860)	4/172	0.607695	1	0.953107	0.474726	DAXX;JTB;IQGAP1;PAK2
potassium ion import (GO:0010107)	1/38	0.609207	1	1.07852	0.534509	KCNE2
T cell differentiation (GO:0030217)	1/38	0.609207	1	1.07852	0.534509	ZFP36L2
muscle filament sliding (GO:0030049)	1/38	0.609207	1	1.07852	0.534509	VIM
mitochondrion disassembly (GO:0061726)	1/38	0.609207	1	1.07852	0.534509	AMBRA1
actin-myosin filament sliding (GO:0033275)	1/38	0.609207	1	1.07852	0.534509	VIM
DNA damage checkpoint (GO:0000077)	1/38	0.609207	1	1.07852	0.534509	ATRIP
regulation of cellular pH (GO:0030641)	1/38	0.609207	1	1.07852	0.534509	CHORDC1
chemical homeostasis (GO:0048878)	1/38	0.609207	1	1.07852	0.534509	NR1H2
activation of GTPase activity (GO:0090630)	2/84	0.61125	1	0.9758	0.480337	TSC1;TBC1D10B
cellular response to molecule of bacterial origin (GO:0071219)	2/84	0.61125	1	0.9758	0.480337	UPF1;NR1H2
regulation of macromolecule metabolic process (GO:0060255)	3/129	0.612852	1	0.953107	0.466671	ARF1;HIF1A;MAPK3
peptide biosynthetic process (GO:0043043)	4/174	0.616784	1	0.942152	0.455282	RPS9;AGO2;MRPS18A;MRPL23
generation of neurons (GO:0048699)	3/130	0.618073	1	0.945776	0.455058	CDK5;FGFR1;ARNTL
skeletal muscle tissue development (GO:0007519)	1/39	0.618761	1	1.05086	0.504452	CFLAR
regulation of type I interferon-mediated signaling pathway (GO:0060338)	1/39	0.618761	1	1.05086	0.504452	HSP90AB1
regulation of proteasomal protein catabolic process (GO:0061136)	1/39	0.618761	1	1.05086	0.504452	KCNE2
clathrin-dependent endocytosis (GO:0072583)	1/39	0.618761	1	1.05086	0.504452	CDK5
purine ribonucleoside monophosphate biosynthetic process (GO:0009168)	1/39	0.618761	1	1.05086	0.504452	ATP5O
positive regulation of fat cell differentiation (GO:0045600)	1/39	0.618761	1	1.05086	0.504452	CEBPB
regulation of plasma membrane bounded cell projection assembly (GO:0120032)	1/39	0.618761	1	1.05086	0.504452	CDC42
regulation of RNA metabolic process (GO:0051252)	1/39	0.618761	1	1.05086	0.504452	CLK3
alpha-amino acid catabolic process (GO:1901606)	1/39	0.618761	1	1.05086	0.504452	GOT2
DNA biosynthetic process (GO:0071897)	1/39	0.618761	1	1.05086	0.504452	RFC3
regulation of coenzyme metabolic process (GO:0051196)	1/39	0.618761	1	1.05086	0.504452	NUP133
regulation of peptidyl-serine phosphorylation (GO:0033135)	2/86	0.624066	1	0.953107	0.44939	EGFR;PPM1F
positive regulation of apoptotic process (GO:0043065)	7/307	0.624684	1	0.93448	0.439682	BCAP31;DNAJA1;RARG;NDUFA13;TFAP4;CDK5;PPM1F
positive regulation of cytokine production (GO:0001819)	5/220	0.625488	1	0.931446	0.437055	CREBBP;CEBPB;DHX36;DDX41;HIF1A
negative regulation of transport (GO:0051051)	1/40	0.628081	1	1.02459	0.476523	NR1H2
intraciliary transport involved in cilium assembly (GO:0035735)	1/40	0.628081	1	1.02459	0.476523	DYNLL1
cognition (GO:0050890)	1/40	0.628081	1	1.02459	0.476523	GNAS
sensory organ development (GO:0007423)	1/40	0.628081	1	1.02459	0.476523	SMG9
autophagy of mitochondrion (GO:0000422)	1/40	0.628081	1	1.02459	0.476523	AMBRA1
positive regulation of mitotic nuclear division (GO:0045840)	1/40	0.628081	1	1.02459	0.476523	DMRT1
response to cAMP (GO:0051591)	1/40	0.628081	1	1.02459	0.476523	DGKQ
androgen receptor signaling pathway (GO:0030521)	1/40	0.628081	1	1.02459	0.476523	DAXX
response to peptide hormone (GO:0043434)	1/40	0.628081	1	1.02459	0.476523	TSC1
negative regulation of ERK1 and ERK2 cascade (GO:0070373)	1/40	0.628081	1	1.02459	0.476523	DUSP10
phosphatidic acid biosynthetic process (GO:0006654)	1/40	0.628081	1	1.02459	0.476523	DGKQ
negative regulation of cytokine-mediated signaling pathway (GO:0001960)	1/40	0.628081	1	1.02459	0.476523	NR1H2
JAK-STAT cascade (GO:0007259)	1/40	0.628081	1	1.02459	0.476523	MAPK3
cellular response to BMP stimulus (GO:0071773)	2/87	0.63035	1	0.942152	0.434784	MAPK3;BMPR1A
Fc-gamma receptor signaling pathway involved in phagocytosis (GO:0038096)	3/133	0.63345	1	0.924442	0.422077	CDC42;HSP90AB1;MAPK3
regulation of gene expression (GO:0010468)	24/1037	0.635662	1	0.948512	0.429759	ESRRA;KMT2D;DAXX;CREBBP;CEBPB;NUP133;TIPARP;CNBP;NFYC;ATRX;ASH2L;SAFB;HIF1A;PPM1F;CLK3;ARNTL;SFPQ;POLR2A;HGS;DGKQ;BHLHE40;UBTF;VPS35;MAPK3
Wnt signaling pathway, planar cell polarity pathway (GO:0060071)	2/88	0.636553	1	0.931446	0.420723	CDC42;PSMC3
odontogenesis (GO:0042476)	1/41	0.637174	1	0.9996	0.450532	BCOR
mesenchymal cell differentiation (GO:0048762)	1/41	0.637174	1	0.9996	0.450532	HIF1A
phosphatidic acid metabolic process (GO:0046473)	1/41	0.637174	1	0.9996	0.450532	DGKQ
regulation of calcium-mediated signaling (GO:0050848)	1/41	0.637174	1	0.9996	0.450532	P2RX2
DNA duplex unwinding (GO:0032508)	1/41	0.637174	1	0.9996	0.450532	DDB1
regulation of substrate adhesion-dependent cell spreading (GO:1900024)	1/41	0.637174	1	0.9996	0.450532	CDC42
cellular response to peptide (GO:1901653)	1/41	0.637174	1	0.9996	0.450532	CDK5
negative regulation of STAT cascade (GO:1904893)	1/41	0.637174	1	0.9996	0.450532	HGS
negative regulation of proteolysis (GO:0045861)	1/41	0.637174	1	0.9996	0.450532	CDK5
Ras protein signal transduction (GO:0007265)	5/223	0.637338	1	0.918915	0.41393	BRAP;CDC42;USP8;SHC1;PAK2
axonogenesis (GO:0007409)	5/223	0.637338	1	0.918915	0.41393	AFG3L2;CDK5;SHC1;RTN4;MAPK3
Fc-gamma receptor signaling pathway (GO:0038094)	3/134	0.638479	1	0.917543	0.411672	CDC42;HSP90AB1;MAPK3
regulation of establishment of planar polarity (GO:0090175)	2/89	0.642673	1	0.92098	0.407183	CDC42;PSMC3
peptidyl-threonine modification (GO:0018210)	2/89	0.642673	1	0.92098	0.407183	CDK5;DYRK1A
[truncated: 269 more rows]

## Sheet: Table 3
Supplementary Table 3. The sequences of primers used in qPCR assay.
	Forward	Reverse
Mouse Xbp1s	GAGTCCGCAGCAGGTG	GTGTCAGAGTCCATGGGA
Mouse Atf4	GCCGGTTTAAGTTGTGTGCT	CTGGATTCGAGGAATGTGCT
Mouse Chop	CGGAACCTGAGGAGAGAGTG	CGTTTCCTGGGGATGAGATA
Mouse Gadd34	AGGACCCCGAGATTCCTCTA	CCTGGAATCAGGGGTAAGGT
Mouse Atf6	GATGCAGCACATGAGGCTTA	CAGGAACGTGCTGAGTTGAA
Mouse Ubc	ACCAGCAGAGGCTGATCTTT	ACCTCTGAGGCGAAGGACTA
Human XBP1s	TGCTGAGTCCGCAGCAGGTG	GCTGGCAGGCTCTGGGGAAG
Human ATF4	AGATGACCTGGAAACCATGC	AGGGATCATGGCAACGTAAG
Human CHOP	AGCAGAGGTCACAAGCACCT	TTCATGCTTGGTGCAGATTC
Human GADD34	GCCCAGAAACCCCTACTCAT	ACAGAGGAGGAAGGCAAGGT
Human ATF6	GCTTTACATTCCTCCACCTCCTTG	ATTTGAGCCCTGTTCCAGAGCAC
Human GAPDH	ACCACAGTCCATGCCATCAC	TCCACCACCCTGTTGCTGTA

## Sheet: Table 4
Supplementary Table 4. sgRNA oligonucleotide sequences for SYVN1/SEL1L knockout.
SYVN1 sg1	ATCACAGCATCCTGACCCGT
SYVN1 sg2	CGTACCAGGAACGTTCCAGA
SYVN1 sg3	GTCATCCCGAAAAACGGTGA
SEL1L sg1	ATACTGACCCGAGGACGCCG
SEL1L sg2	GGGCAATCTAATAGCCCACA
SEL1L sg3	GTAAAGGACCATACTACTGC

## Sheet: Table 5
Supplementary Table 5. PCR primers used to validate genomic knockout of SYVN1 and SEL1L
		product size
SYVN1 exon3-F	GCAGCAGAGATGGAGGTAAGAT	264bp
SYVN1 exon3-R	CCTTGACTCACAAAGTCCACAC
SYVN1 exon5-F	CCACAGCTCTTATGTTCCTCCT	190bp
SYVN1 exon5-R	AGGAAGGGTCTGTTGGGTTATT
SEL1L exon1-F	GACAGCTCTAGGGGTTGGC	287bp
SEL1L exon1-R	CACCTTCCTAAATAGCCCCTTT
SEL1L exon3-F	GGAAAGTCTTGGCATTGTTGAT	280bp
SEL1L exon3-R	CCTGGTTTCCGTACTTTCTTTG
SEL1L exon7-F	GCTTTCTGTATGCCTCTGGACT	290bp
SEL1L exon7-R	TCTGGATCATGAAAGCTGAAAA
